# Supplementary material for: Iron triggers colony formation in Phaeocystis antarctica : connecting molecular mechanisms with iron biogeochemistry
Source: Copernicus journal article supplement (doi:10.5194/bg-2017-558), 2018-01-26
Supplement: Supplementary file 1 [file bg-2017-558-supplement.zip]

Archive with 3 entries (3 files):
- Supplemental Data 1 Aug 22 17.xls
- Supplemental Doc Dec 23_Version4.pdf
- Supplemental Data 2 Aug 22 17.xls
