# Supplementary material for: Iron triggers colony formation in Phaeocystis antarctica : connecting molecular mechanisms with iron biogeochemistry
Source: Copernicus journal article supplement (doi:10.5194/bg-2017-558), 2018-01-26
Supplement: Supplementary file 1 [file Supplemental Data 1 Aug 22 17.xls]

## Sheet: Dataset S1
Contig ID	P. antarctica strain	2pM treatment A	2pM treatment B	2pM treatment C	41pM treatment A	41pM treatment B	41pM treatment C	120pM treatment A	120pM treatment B	120pM treatment C	740pM treatment A	740pM treatment B	740pM treatment B	1200pM treatment A	1200pM treatment B	1200pM treatment C	3900pM treatment A	3900pM treatment B	3900pM treatment C	2pM average	41pM average	120pM average	740pM average	1200pM average	3900pM average	2pM stddev	41pM stddev	120pM stddev	740pM stddev	1200pM stddev	3900pM stddev	Change in transcript abundance (3900/41pM)	P-value (3900/41pM)	P-value (41/3900pM)	contig length	open reading frame length	KEGG hit	KEGG description	KEGG pathway	KO	KO description	KO pathway	EC	UniProt	KOG ID	KOG description	KOG class	KOG group	Pfam
contig_116716_375_886_-	1374	7.9075	7.8357	9.2088	8.8064	9.342	8.9121	7.8176	8.8215	10.237	7.1519	7.1106	7.8178	1.9386	1.9079	2.8277	5.2321	7.0938	5.1533	8.31733	9.02017	8.9587	7.3601	2.22473	5.8264	0.772867	0.283682	1.21552	0.396917	0.52241	1.09831	0.597473	1	0	886	512
contig_132760_1086_2995_+	1374	12.85	13.713	13.302	20.255	20.383	24.306	14.518	15.438	19.45	4.7679	3.9503	3.9089	0	0	2.8277	1.744	1.7735	0	13.2883	21.648	16.4687	4.20903	0.942567	1.1725	0.431662	2.30279	2.62257	0.484435	1.63257	1.01552	-5.0997	0	1	6846	1910	pti:PHATR_46929	hypothetical protein						B5Y488
contig_15218_109_546_+	1374	0.98843	0.97947	2.0464	0.88064	0.84928	0.81019	0	0	0	4.7679	5.5304	4.6907	2.9078	1.9079	0.94256	1.744	0	1.7178	1.3381	0.846703	0	4.99633	1.91942	1.15393	0.613422	0.0352956	0	0.464123	0.982671	0.999421	0.873875	1	0	2086	438	ppp:PHYPADRAFT_119898	hypothetical protein; K02898 large subunit ribosomal protein L26e	ppp03010	K02898	large subunit ribosomal protein L26e	Ribosome		A9RV92	KOG3401	60S ribosomal protein L26	Translation, ribosomal structure and biogenesis	INFORMATION STORAGE AND PROCESSING	_GAP_||PF00467||_GAP_
contig_159184_121_1370_+	1374	6.919	7.8357	6.1392	5.2838	5.0957	4.8611	4.4672	1.1027	4.0948	2.384	2.3702	1.5636	0	0.95395	0	0	0	0	6.96463	5.0802	3.22157	2.10593	0.317983	0	0.84917	0.211776	1.84442	0.469725	0.550763	0	0.0708391	0	0	3445	1250	hsa:5232	PGK2, PGKB, PGKPS, dJ417L20.2; phosphoglycerate kise 2 (EC:2.7.2.3); K00927 phosphoglycerate kise [EC:2.7.2.3]							KOG1367	3-phosphoglycerate kise	Carbohydrate transport and metabolism	METABOLISM	PF00162
contig_16003_72_848_+	1374	2.9653	3.9179	5.116	2.6419	4.2464	4.051	8.9344	8.8215	9.2134	3.9733	5.5304	4.6907	10.662	10.493	8.483	1.744	1.7735	1.7178	3.99973	3.64643	8.98977	4.73147	9.87933	1.7451	1.07768	0.87542	0.201731	0.77935	1.21221	0.0278663	0.0456786	0	0	1042	777													PF01549
contig_160684_1_610_+	1374	8.8959	6.8563	8.1856	7.0451	5.9449	8.9121	11.168	9.9242	11.261	8.7412	9.4807	10.945	3.8771	1.9079	3.7702	8.7202	10.641	12.024	7.97927	7.3007	10.7844	9.7223	3.18507	10.4617	1.03534	1.50002	0.746405	1.12159	1.10735	1.65918	1.26672	1	0	1021	610	pti:PHATRDRAFT_46347	hypothetical protein						B7G0W9					_GAP_||PF05981
contig_162650_133_783_+	1374	1.9769	1.9589	2.0464	2.6419	2.5478	2.4306	5.584	4.4108	4.0948	6.3572	6.3205	5.4725	4.8464	5.7237	5.6553	1.744	1.7735	1.7178	1.99407	2.5401	4.69653	6.05007	5.40847	1.7451	0.046207	0.10586	0.784641	0.500524	0.487964	0.0278663	0.474629	1	0	985	651	ppp:PHYPADRAFT_180214	hypothetical protein; K02865 large subunit ribosomal protein L10Ae	ppp03010	K02865	large subunit ribosomal protein L10Ae	Ribosome		A9S177	KOG1570	60S ribosomal protein L10A	Translation, ribosomal structure and biogenesis	INFORMATION STORAGE AND PROCESSING	PF00687
contig_180311_2068_2717_+	1374	1.9769	0.97947	1.0232	2.6419	3.3971	3.2408	3.3504	3.3081	4.0948	2.384	2.3702	3.1271	2.9078	3.8158	4.7128	6.9762	7.0938	8.5888	1.32652	3.09327	3.58443	2.6271	3.81213	7.55293	0.563667	0.398631	0.442496	0.433068	0.902506	0.899012
contig_184956_73_1560_+	1374	4.9422	4.8973	6.1392	6.1644	5.9449	7.2917	2.2336	5.5134	3.0711	1.5893	0.79006	1.5636	5.8157	6.6777	8.483	0	1.7735	0	5.32623	6.467	3.60603	1.31432	6.99213	0.591167	0.704408	0.722594	1.70408	0.454204	1.36117	1.02393	0.86658	1	0	2270	1488									KOG2265	Nuclear distribution protein NUDC	Sigl transduction mechanisms	CELLULAR PROCESSES AND SIGLING	PF14050||_GAP_||PF04969||_GAP_
contig_186502_1_1307_+	1374	0.98843	0.97947	1.0232	3.5225	3.3971	1.6204	1.1168	3.3081	4.0948	3.9733	3.1602	1.5636	5.8157	3.8158	3.7702	5.2321	3.5469	6.871	0.997033	2.84667	2.8399	2.89903	4.46723	5.21667	0.0230996	1.06383	1.54322	1.2259	1.16803	1.6621	-0.283676	0	0	2015	1307									KOG3511	Sortilin and related receptors	General function prediction only	POORLY CHARACTERIZED	_GAP_||PF14870
contig_190844_1_438_+	1374	0.98843	0	0	0	0	0	1.1168	0	3.0711	6.3572	5.5304	6.2542	7.7543	5.7237	8.483	0	0	0	0.329477	0	1.39597	6.04727	7.32033	0	0.57067	0	1.55447	0.450573	1.42992	0	0.969504	0.999997	0	783	438									KOG0878	60S ribosomal protein L32	Translation, ribosomal structure and biogenesis	INFORMATION STORAGE AND PROCESSING	PF01655
contig_198865_35_811_+	1374	8.8959	7.8357	10.232	8.8064	7.6435	8.1019	3.3504	3.3081	3.0711	2.384	3.1602	3.1271	0	0	0	0	0	0	8.98787	8.18393	3.2432	2.89043	0	0	1.20079	0.585774	0.150536	0.438896	0	0	-0.266984	0	0.00062429	2160	777													_GAP_||PF00504
contig_199594_1_1845_+	1374	0	0	0	0	0	0.81019	1.1168	0	0	0.79465	0	0.78178	3.8771	2.8619	3.7702	3.4881	7.0938	1.7178	0	0.270063	0.372267	0.525477	3.50307	4.0999	0	0.467763	0.644785	0.455122	0.557833	2.73972	-0.406785	0	0.504962	2138	1845	tps:THAPSDRAFT_13556	hypothetical protein; K01210 glucan 1,3-beta-glucosidase [EC:3.2.1.58]	tps00500	K01210	glucan 1,3-beta-glucosidase [EC:3.2.1.58]	Starch and sucrose metabolism	3.2.1.58	B8BUM3					_GAP_||PF00150||_GAP_
contig_25903_56_729_+	1374	3.9537	2.9384	2.0464	1.7613	1.6986	1.6204	1.1168	2.2054	2.0474	2.384	3.1602	3.1271	2.9078	1.9079	1.8851	5.2321	5.3204	3.4355	2.9795	1.69343	1.78987	2.89043	2.2336	4.66267	0.954314	0.0705919	0.588222	0.438896	0.583986	1.06367	0.720164	1	0	729	674	tps:THAPS_6817	hypothetical protein						B5YMK1
contig_339_897_1472_-	1374	2.9653	2.9384	4.0928	1.7613	2.5478	2.4306	5.584	4.4108	4.0948	1.5893	1.5801	1.5636	5.8157	4.7698	3.7702	3.4881	3.5469	3.4355	3.33217	2.24657	4.69653	1.57767	4.78523	3.49017	0.658865	0.424319	0.784641	0.0130216	1.02284	0.0557287	-1.62524	0	1	1667	576
contig_34468_32_987_+	1374	1.9769	2.9384	2.0464	10.568	13.588	14.583	18.986	24.259	18.427	8.7412	9.4807	9.3814	3.8771	1.9079	2.8277	3.4881	3.5469	1.7178	2.32057	12.913	20.5573	9.2011	2.8709	2.9176	0.536187	2.09088	3.2179	0.401368	0.985311	1.03947	-0.399748	0	0.271616	987	956	tet:TTHERM_00836580 || tet:TTHERM_00348510	Tubulin/FtsZ family, GTPase domain containing protein; K07375 tubulin beta || Tubulin beta chain, putative; K07375 tubulin beta							KOG1375	Beta tubulin	Cytoskeleton	CELLULAR PROCESSES AND SIGLING	PF00091||_GAP_||PF03953
contig_38255_1_556_+	1374	11.861	10.774	13.302	10.568	9.342	8.1019	8.9344	8.8215	9.2134	13.509	11.851	12.508	1.9386	1.9079	1.8851	3.4881	5.3204	5.1533	11.979	9.3373	8.98977	12.6227	1.91053	4.65393	1.26812	1.23306	0.201731	0.834927	0.026847	1.01309	0.624615	0.999999	0	556	556	dal:Dalk_4145	peptidyl-prolyl cis-trans isomerase cyclophilin type						B8FMV9					PF00160
contig_56647_66_983_+	1374	4.9422	3.9179	4.0928	1.7613	1.6986	1.6204	1.1168	1.1027	1.0237	8.7412	7.9006	7.036	0	0	0	0	0	0	4.31763	1.69343	1.08107	7.8926	0	0	0.547914	0.0705919	0.0501787	0.852628	0	0	1.25046	1	0	1061	918	cyb:CYB_0967	chloroplast envelope protein translocase (CEPT or Tic-Toc) family protein						Q2JMT7					PF04278||_GAP_
contig_57020_389_1024_+	1374	8.8959	7.8357	8.1856	7.9257	10.191	8.9121	0	0	0	11.125	11.851	13.29	7.7543	7.6316	6.5979	8.7202	8.8673	0	8.30573	9.0096	0	12.0887	7.32793	5.8625	0.540213	1.13579	0	1.10189	0.635197	5.07761	0.558377	1	0	1203	636	pde:Pden_0685	TolA family protein; K03646 colicin import membrane protein		K03646	colicin import membrane protein			A1AZV3
contig_59676_1_1086_+	1374	0	0	0	0	0.84928	0.81019	0	0	0	0	0	0	0.96928	0.95395	1.8851	3.4881	3.5469	3.4355	0	0.553157	0	0	1.26944	3.49017	0	0.479446	0	0	0.533229	0.0557287	-0.769581	0	0.992033	1287	1086	pti:PHATR_46929	hypothetical protein						B5Y488
contig_86538_1_875_+	1374	0	0	0	0	0	0	0	0	0	0	0	0	5.8157	6.6777	4.7128	19.185	15.961	17.178	0	0	0	0	5.7354	17.4413	0	0	0	0	0.984908	1.62805	1.79451	1	4.24e-22	875	875	vcn:VOLCADRAFT_93060	hypothetical protein											_GAP_||PF07648||_GAP_
contig_112128_1_1411_+	1374	0	0	0	0.88064	0	0.81019	0	0	0	3.1786	0.79006	1.5636	0.96928	0.95395	0.94256	0	1.7735	0	0	0.56361	0	1.84409	0.955263	0.591167	0	0.48937	0	1.21872	0.0134083	1.02393	-0.929608	0	0.998659	1412	1411									KOG2566	Beta-glucocerebrosidase	Carbohydrate transport and metabolism	METABOLISM	PF02055
contig_156050_329_808_-	1374	1.9769	1.9589	1.0232	1.7613	0.84928	0.81019	1.1168	2.2054	1.0237	3.9733	2.3702	2.3453	0	0	0	0	0	0	1.653	1.14026	1.44863	2.89627	0	0	0.545497	0.538194	0.65703	0.932821	0	0	1.16064	1	0	808	480	acd:AOLE_03520	hypothetical protein						D8JDG6					_GAP_||PF01906
contig_164871_268_939_-	1374	0	0	0	0	0	0	0	0	0	0	0	0	1.9386	1.9079	1.8851	0	0	0	0	0	0	0	1.91053	0	0	0	0	0	0.026847	0	0.419051	0.537593	0	939	672	syp:SYNPCC7002_A0110	branched-chain alpha-keto acid dehydrogese subunit E2; K00627 pyruvate dehydrogese E2 component (dihydrolipoamide acetyltransferase) [EC:2.3.1.12]	syp01110||syp00620||syp01100||syp00010||syp00020||syp01120	K00627	pyruvate dehydrogese E2 component (dihydrolipoamide acetyltransferase) [EC:2.3.1.12]	Glycolysis / Gluconeogenesis || Citrate cycle (TCA cycle) || Pyruvate metabolism || Carbon metabolism	2.3.1.12	B1XLG5					PF00198
contig_167900_42_668_+	1374	0	0	0	0	0	0	0	0	0	1.5893	0	0.78178	0	0	0	0	0	0	0	0	0	0.79036	0	0	0	0	0	0.794685	0	0	0.652876	1	0	1286	627	cre:CHLREDRAFT_184730 || cre:CHLREDRAFT_184731	LHCSR3; stress-related chlorophyll a/b binding protein 3; K08907 light-harvesting complex I chlorophyll a/b binding protein 1 || LHCSR2; stress-related chlorophyll a/b binding protein 2	cre00196	K08907	light-harvesting complex I chlorophyll a/b binding protein 1	Photosynthesis - anten proteins		A8J431					_GAP_||PF00504
contig_180136_1_758_+	1374	0.98843	0.97947	2.0464	0.88064	0	0	0	0	1.0237	0	0.79006	0	1.9386	0.95395	1.8851	1.744	1.7735	1.7178	1.3381	0.293547	0.341233	0.263353	1.59255	1.7451	0.613422	0.508438	0.591033	0.456141	0.55369	0.0278663	0.410684	0.518426	0	2515	758	pti:PHATRDRAFT_44273	hypothetical protein						B7FTJ4					_GAP_||PF07386||_GAP_
contig_186880_1_715_+	1374	0	0	0	0	0	0	0	0	0	0	0	0	1.9386	1.9079	1.8851	0	0	0	0	0	0	0	1.91053	0	0	0	0	0	0.026847	0	0.754427	1	0	876	715	olu:OSTLU_13461	PRPL11; Plastid ribosomal protein L11 large ribosomal subunit; K02867 large subunit ribosomal protein L11	olu03010	K02867	large subunit ribosomal protein L11	Ribosome		A4SAW7					_GAP_||PF03946||PF00298
contig_200363_297_773_-	1374	0	0	0	0	0	0	3.3504	2.2054	3.0711	0	0	0	1.9386	1.9079	1.8851	0	0	0	0	0	2.87563	0	1.91053	0	0	0	0.597002	0	0.026847	0	0.11378	0.00220381	0	1559	477
contig_99387_57_809_-	1374	2.9653	1.9589	3.0696	3.5225	2.5478	1.6204	0	0	0	2.384	0.79006	0.78178	0	0	0	0	0	0	2.6646	2.56357	0	1.31861	0	0	0.613375	0.951148	0	0.922661	0	0	0.825939	1	0	842	753
contig_37137_1_731_+	1871	0	0	0	0	0	0	5.7345	4.5462	1.4386	4.6903	1.3146	2.1282	3.69	3.2912	2.8899	5.084	4.8188	5.2355	0	0	3.90643	2.71103	3.29037	5.0461	0	0	2.21826	1.76171	0.400051	0.210919	2.1664	1	0	860	731	pti:PHATRDRAFT_9654	hypothetical protein						B7FPZ7					PF00815
contig_68751_1_1019_-	1871	0	0	0	0	0	0	2.8672	1.5154	1.4386	6.5664	6.5731	6.3846	2.214	0.82279	1.4449	3.6314	0.80313	1.9633	0	0	1.9404	6.50803	1.4939	2.13261	0	0	0.80355	0.106949	0.696898	1.42172	-0.519443	0	0.778458	1020	1019	tps:THAPSDRAFT_8775	hypothetical protein						B8LC05
contig_101945_2009_2947_+	1871	0	0	0	1.7875	1.1851	2.6126	0	0	0	0	0	0	0	0	0	0	0	0	0	1.86173	0	0	0	0	0	0.716639	0	0	0	0	1.46379	1	0	3204	939	cre:CHLREDRAFT_151480	hypothetical protein						A8J8K5					_GAP_||PF00153
contig_103235_40_1035_+	1871	0	0	0	0	0	0	0	0	0	0	0	1.0641	0.738	1.6456	0.72247	0	0	0	0	0	0	0.3547	1.03536	0	0	0	0	0.614358	0.528543	0	2.17503	1	0	1324	996
contig_42907_111_1603_-	1871	0	0	0	0	0	0	0	0	0	0.93805	0	1.0641	0	0.82279	1.4449	0	0	0	0	0	0	0.667383	0.755897	0	0	0	0	0.581397	0.724769	0	0.901977	0.999859	0	1634	1493													_GAP_||PF01565||_GAP_
contig_98104_1422_1889_-	1871	0	0	0	1.7875	1.1851	0	0	0	0	0	0	0	0.738	0	0.72247	0.72629	0.80313	1.3089	0	0.990867	0	0	0.486823	0.946107	0	0.909442	0	0	0.421673	0.316529
contig_98960_952_1980_-	1871	0	0	0	0	0	0	0	1.5154	1.4386	0	0	0	0	0.82279	1.4449	2.1789	1.6063	1.3089	0	0	0.984667	0	0.755897	1.69803	0	0	0.853611	0	0.724769	0.442195	-0.395713	0	0.470355	2146	1029													PF00933||_GAP_
contig_10394_383_979_-	1374	4.9422	4.8973	5.116	5.2838	5.0957	4.8611	6.7008	5.5134	4.0948	6.3572	6.3205	6.2542	5.8157	5.7237	5.6553	6.9762	8.8673	5.1533	4.98517	5.0802	5.43633	6.31063	5.73157	6.99893	0.115508	0.211776	1.30471	0.0522041	0.0804888	1.8571	0.559591	1	0	1245	597	pti:PHATRDRAFT_14529	hypothetical protein; K01507 inorganic pyrophosphatase [EC:3.6.1.1]	pti00190	K01507	inorganic pyrophosphatase [EC:3.6.1.1]	Oxidative phosphorylation	3.6.1.1	B7G529	KOG1626	Inorganic pyrophosphatase/Nucleosome remodeling factor, subunit NURF38	Energy production and conversion	METABOLISM	PF00719
contig_108252_3241_3711_+	1374	0	0	0	0.88064	0.84928	0	1.1168	1.1027	0	3.1786	4.7404	5.4725	9.6928	8.5856	10.368	3.4881	1.7735	1.7178	0	0.57664	0.739833	4.46383	9.5488	2.32647	0	0.499631	0.640753	1.17169	0.899883	1.00639	-0.213799	6.21e-06	0.0919694	5369	471	cya:CYA_1300	rpsG; 30S ribosomal protein S7; K02992 small subunit ribosomal protein S7	cya03010	K02992	small subunit ribosomal protein S7	Ribosome		Q2JUX6	KOG3291	Ribosomal protein S7	Translation, ribosomal structure and biogenesis	INFORMATION STORAGE AND PROCESSING	PF00177
contig_109057_32_2002_-	1374	0.98843	1.9589	1.0232	0.88064	1.6986	0.81019	1.1168	1.1027	1.0237	0.79465	0.79006	0	2.9078	2.8619	4.7128	3.4881	1.7735	1.7178	1.32351	1.12981	1.08107	0.528237	3.49417	2.32647	0.550538	0.493844	0.0501787	0.457472	1.05562	1.00639	-0.161513	0	0.000818394	2004	1971	mpo:Mpop_0274	hypothetical protein						B1ZH54
contig_109246_59_1006_+	1374	14.827	13.713	11.255	21.135	16.986	17.014	12.285	13.232	13.308	9.5358	11.851	9.3814	6.785	8.5856	8.483	3.4881	0	1.7178	13.265	18.3783	12.9417	10.2561	7.9512	1.7353	1.82766	2.38738	0.569958	1.38341	1.01126	1.74412	-0.425823	0	0.780887	1251	948	pti:PHATRDRAFT_42018	hypothetical protein; K02641 ferredoxin--DP+ reductase [EC:1.18.1.2]	pti01100||pti00195	K02641	ferredoxin--DP+ reductase [EC:1.18.1.2]	Photosynthesis	1.18.1.2	B7G0M5					_GAP_||PF00175
contig_10979_247_957_-	1374	0	1.9589	2.0464	0.88064	0.84928	0.81019	0	0	1.0237	1.5893	3.1602	3.9089	1.9386	1.9079	1.8851	5.2321	5.3204	5.1533	1.3351	0.846703	0.341233	2.88613	1.91053	5.23527	1.15706	0.0352956	0.591033	1.18384	0.026847	0.083595	0.252517	0.0149395	0	1103	711	tps:THAPSDRAFT_bd1762	hypothetical protein						B8LE09
contig_116247_132_710_+	1374	2.9653	1.9589	2.0464	2.6419	2.5478	2.4306	3.3504	2.2054	2.0474	3.9733	6.3205	6.2542	5.8157	4.7698	3.7702	1.744	1.7735	1.7178	2.32353	2.5401	2.5344	5.516	4.78523	1.7451	0.557506	0.10586	0.711079	1.33643	1.02284	0.0278663	0.964707	1	0	829	579									KOG1696	60s ribosomal protein L19	Translation, ribosomal structure and biogenesis	INFORMATION STORAGE AND PROCESSING	PF01280||_GAP_
contig_116472_87_1270_+	1374	17.792	15.671	17.394	17.613	16.136	21.065	12.285	14.335	13.308	15.098	20.542	18.763	8.7235	9.5395	7.5404	3.4881	7.0938	6.871	16.9523	18.2713	13.3093	18.1343	8.60113	5.81763	1.12737	2.52959	1.025	2.77591	1.00515	2.02051	0.310818	0.00286194	0	1678	1184	tps:THAPSDRAFT_9021	PbgD; porphobilinogen deamise (EC:2.5.1.61); K01749 hydroxymethylbilane synthase [EC:2.5.1.61]	tps01100||tps01110||tps00860	K01749	hydroxymethylbilane synthase [EC:2.5.1.61]	Porphyrin and chlorophyll metabolism	2.5.1.61	B8CA57	KOG2892	Porphobilinogen deamise	Coenzyme transport and metabolism	METABOLISM	_GAP_||PF01379||PF03900||_GAP_
contig_116674_107_358_+	1374	0	0	0	0	0	0	0	0	0	3.1786	3.9503	3.9089	0.96928	1.9079	1.8851	1.744	1.7735	1.7178	0	0	0	3.67927	1.58743	1.7451	0	0	0	0.434084	0.535452	0.0278663	1.22791	1	0	593	252	ppp:PHYPADRAFT_104663	hypothetical protein						A9RIX9	KOG3489	Mitochondrial import inner membrane translocase, subunit TIM8	Intracellular trafficking, secretion, and vesicular transport	CELLULAR PROCESSES AND SIGLING	PF02953
contig_116725_106_561_+	1374	0.98843	1.9589	0	2.6419	2.5478	1.6204	3.3504	3.3081	2.0474	3.1786	3.9503	3.9089	2.9078	3.8158	2.8277	0	0	0	0.982443	2.27003	2.90197	3.67927	3.18377	0	0.979464	0.564563	0.740379	0.434084	0.54882	0	0.956927	1	0	751	456	ppp:PHYPADRAFT_175978 || ppp:PHYPADRAFT_214095 || ppp:PHYPADRAFT_109710	hypothetical protein || hypothetical protein; K02953 small subunit ribosomal protein S13e || hypothetical protein; K02953 small subunit ribosomal protein S13e	ppp03010	K02953	small subunit ribosomal protein S13e	Ribosome		A9RKW1	KOG0400	40S ribosomal protein S13	Translation, ribosomal structure and biogenesis	INFORMATION STORAGE AND PROCESSING	PF08069||PF00312
contig_116813_1_991_-	1374	9.8843	9.7947	11.255	9.687	9.342	7.2917	13.402	12.13	12.285	7.1519	7.1106	7.036	6.785	8.5856	7.5404	1.744	1.7735	1.7178	10.3113	8.77357	12.6057	7.0995	7.637	1.7451	0.818466	1.29488	0.693986	0.0587419	0.904178	0.0278663	-0.205972	0	0.000389553	1021	991	olu:OSTLU_16870	hypothetical protein; K12524 bifunctiol aspartokise / homoserine dehydrogese 1 [EC:2.7.2.4 1.1.1.3]	olu00260||olu01110||olu00270||olu00300||olu01100	K12524	bifunctiol aspartokise / homoserine dehydrogese 1 [EC:2.7.2.4 1.1.1.3]	Glycine, serine and threonine metabolism || Cysteine and methionine metabolism || Lysine biosynthesis || Biosynthesis of amino acids	2.7.2.4||1.1.1.3	A4S2Z7	KOG0455	Homoserine dehydrogese	Amino acid transport and metabolism	METABOLISM	_GAP_||PF03447||PF00742
contig_127506_1_483_+	1374	4.9422	3.9179	3.0696	5.2838	4.2464	6.4815	8.9344	7.7188	8.1897	8.7412	7.1106	7.8178	9.6928	9.5395	10.368	3.4881	5.3204	5.1533	3.97657	5.33723	8.28097	7.88987	9.86677	4.65393	0.937677	1.11851	0.612918	0.817685	0.440796	1.01309	1.0701	1	0	483	483	ppp:PHYPADRAFT_176556 || ppp:PHYPADRAFT_195032	hypothetical protein; K02960 small subunit ribosomal protein S16e || hypothetical protein; K02960 small subunit ribosomal protein S16e	ppp03010	K02960	small subunit ribosomal protein S16e	Ribosome		A9RMV9	KOG1753	40S ribosomal protein S16	Translation, ribosomal structure and biogenesis	INFORMATION STORAGE AND PROCESSING	_GAP_||PF00380
contig_132760_5084_6399_+	1374	11.861	11.754	9.2088	11.448	13.588	9.7223	8.9344	7.7188	8.1897	3.1786	4.7404	3.1271	0.96928	0.95395	1.8851	1.744	0	0	10.9413	11.5861	8.28097	3.68203	1.26944	0.581333	1.50131	1.93655	0.612918	0.916934	0.533229	1.0069	-4.76395	0	1	6846	1316	pti:PHATR_46929	hypothetical protein						B5Y488
contig_134039_1_457_+	1374	0	0	0	0	0	0	3.3504	3.3081	5.1185	3.1786	5.5304	3.9089	1.9386	3.8158	2.8277	0	0	0	0	0	3.92567	4.20597	2.8607	0	0	0	1.03324	1.20371	0.939035	0	0.681059	1	0	3785	457									KOG3424	40S ribosomal protein S24	Translation, ribosomal structure and biogenesis	INFORMATION STORAGE AND PROCESSING	_GAP_||PF01282
contig_134365_289_1466_-	1374	8.8959	8.8152	7.1624	9.687	8.4928	10.532	8.9344	8.8215	8.1897	14.304	13.431	15.636	0.96928	0.95395	1.8851	0	0	0	8.29117	9.5706	8.64853	14.457	1.26944	0	0.978373	1.02457	0.401351	1.11043	0.533229	0	1.02141	1	0	1467	1178
contig_134861_579_1163_-	1374	10.873	15.671	15.348	8.8064	11.041	8.9121	3.3504	3.3081	3.0711	5.5626	4.7404	7.8178	2.9078	4.7698	2.8277	6.9762	5.3204	3.4355	13.964	9.5865	3.2432	6.04027	3.50177	5.24403	2.68175	1.26074	0.150536	1.59334	1.09888	1.77158	0.337756	2.74e-06	0	1164	585	olu:OSTLU_27592	hypothetical protein						A4S7R6					_GAP_||PF14347
contig_135790_26_1255_+	1374	2.9653	0.97947	2.0464	2.6419	2.5478	4.051	11.168	12.13	12.285	5.5626	6.3205	7.036	3.8771	5.7237	4.7128	10.464	7.0938	6.871	1.99706	3.08023	11.861	6.30637	4.7712	8.14293	0.993834	0.842024	0.605139	0.736802	0.924684	2.01319	-0.203642	0	0	1414	1230									KOG0621	Phospholipid scramblase	Cell wall/membrane/envelope biogenesis	CELLULAR PROCESSES AND SIGLING	PF03803||_GAP_
contig_141893_145_789_-	1374	5.9306	5.8768	5.116	5.2838	5.0957	6.4815	2.2336	2.2054	2.0474	4.7679	3.9503	3.9089	3.8771	3.8158	3.7702	5.2321	3.5469	3.4355	5.64113	5.62033	2.16213	4.20903	3.82103	4.0715	0.455574	0.751699	0.100357	0.484435	0.0536418	1.00665	0.530384	0.999622	0	1360	645
contig_144266_1_463_+	1374	8.8959	8.8152	10.232	9.687	10.191	8.9121	6.7008	6.6161	6.1423	7.9465	7.9006	7.036	4.8464	4.7698	4.7128	8.7202	8.8673	10.307	9.31437	9.5967	6.4864	7.6277	4.77633	9.29817	0.795717	0.644214	0.300994	0.512941	0.0670392	0.876766	0.806409	1	0	464	463	tps:THAPSDRAFT_bd1863	hypothetical protein						B8LEJ5
contig_150395_1508_2017_-	1374	4.9422	2.9384	4.0928	4.4032	4.2464	4.051	1.1168	2.2054	1.0237	7.1519	7.1106	6.2542	7.7543	7.6316	7.5404	1.744	3.5469	3.4355	3.99113	4.23353	1.44863	6.8389	7.6421	2.9088	1.00576	0.176452	0.65703	0.506786	0.107336	1.01028	0.907293	1	0	2019	510									KOG1742	60s ribosomal protein L15/L27	Translation, ribosomal structure and biogenesis	INFORMATION STORAGE AND PROCESSING	_GAP_||PF00828
contig_150569_298_861_+	1374	0.98843	1.9589	2.0464	1.7613	1.6986	1.6204	2.2336	1.1027	4.0948	3.1786	3.9503	3.1271	1.9386	1.9079	0.94256	5.2321	1.7735	1.7178	1.66458	1.69343	2.47703	3.41867	1.59635	2.9078	0.587192	0.0705919	1.51083	0.461127	0.56641	2.0131	0.235179	0.120104	6.7e-06	966	564	pti:PHATRDRAFT_50111	hypothetical protein						B7GCZ4
contig_152985_369_614_+	1374	1.9769	0.97947	1.0232	0.88064	0.84928	1.6204	2.2336	3.3081	4.0948	4.7679	3.9503	4.6907	7.7543	6.6777	6.5979	5.2321	7.0938	8.5888	1.32652	1.11677	3.21217	4.46963	7.00997	6.97157	0.563667	0.436435	0.934301	0.451409	0.645845	1.68169
contig_153614_1_672_+	1374	30.641	25.466	25.58	24.658	22.081	25.116	34.621	35.286	33.782	30.197	28.442	28.926	34.894	33.388	32.047	38.369	35.469	37.791	27.229	23.9517	34.563	29.1883	33.443	37.2097	2.95543	1.63615	0.753676	0.906433	1.4243	1.53491	1.15081	0.999999	0	820	672	tps:THAPSDRAFT_bd2073	hypothetical protein; K02704 photosystem II CP47 chlorophyll apoprotein	tps01100||tps00195	K02704	photosystem II CP47 chlorophyll apoprotein	Photosynthesis		A0T0P5					PF00421
contig_157605_72_1624_+	1374	2.9653	3.9179	5.116	1.7613	1.6986	1.6204	4.4672	4.4108	4.0948	1.5893	0.79006	0.78178	7.7543	3.8158	6.5979	8.7202	7.0938	6.871	3.99973	1.69343	4.32427	1.05371	6.056	7.56167	1.07768	0.0705919	0.200715	0.46385	2.0244	1.00948	0.134337	0	0	2189	1553	tps:THAPSDRAFT_40393	PYK1; pyruvate kise (EC:2.7.1.40); K00873 pyruvate kise [EC:2.7.1.40]	tps01100||tps00230||tps01110||tps00010||tps00620	K00873	pyruvate kise [EC:2.7.1.40]	Glycolysis / Gluconeogenesis || Purine metabolism || Pyruvate metabolism || Carbon metabolism || Biosynthesis of amino acids || Type II diabetes mellitus || Viral carcinogenesis	2.7.1.40	B8BZT6	KOG2323	Pyruvate kise	Carbohydrate transport and metabolism	METABOLISM	PF00224||PF02887
contig_157911_954_2033_-	1374	0	0	1.0232	3.5225	3.3971	5.6713	1.1168	1.1027	3.0711	3.9733	3.9503	4.6907	2.9078	3.8158	1.8851	0	1.7735	0	0.341067	4.19697	1.76353	4.20477	2.86957	0.591167	0.590745	1.27835	1.13241	0.420988	0.965918	1.02393	0.576092	0.999988	0	3065	1080									KOG1557	Fructose-biphosphate aldolase	Carbohydrate transport and metabolism	METABOLISM	PF00274
contig_159182_50_1248_+	1374	2.9653	2.9384	3.0696	0.88064	0.84928	0	2.2336	4.4108	4.0948	1.5893	1.5801	0	3.8771	4.7698	3.7702	0	0	0	2.9911	0.57664	3.57973	1.05647	4.13903	0	0.0693007	0.499631	1.17644	0.914939	0.548869	0	0.665092	1	0	1592	1199	ppp:PHYPADRAFT_170836	hypothetical protein						A9TMB0	KOG2776	Metallopeptidase	General function prediction only	POORLY CHARACTERIZED	_GAP_||PF00557||_GAP_
contig_15944_1_450_+	1374	7.9075	8.8152	7.1624	3.5225	5.0957	4.051	2.2336	3.3081	5.1185	3.9733	3.9503	3.1271	0.96928	2.8619	0.94256	3.4881	3.5469	0	7.9617	4.22307	3.5534	3.68357	1.59125	2.345	0.827732	0.80059	1.45801	0.482051	1.1005	2.03104	0.608183	1	0	624	450									KOG1735	Actin depolymerizing factor	Cytoskeleton	CELLULAR PROCESSES AND SIGLING	PF00241
contig_15954_129_716_-	1374	0.98843	1.9589	1.0232	4.4032	5.0957	4.051	6.7008	4.4108	7.166	7.9465	7.1106	8.5996	7.7543	7.6316	8.483	1.744	1.7735	1.7178	1.32351	4.51663	6.09253	7.88557	7.9563	1.7451	0.550538	0.531507	1.47488	0.746368	0.460243	0.0278663	0.961939	1	0	941	588	vcn:VOLCADRAFT_120316	rps5; component of cytosolic 80S ribosome and 40S small subunit; K02989 small subunit ribosomal protein S5e							KOG3291	Ribosomal protein S7	Translation, ribosomal structure and biogenesis	INFORMATION STORAGE AND PROCESSING	_GAP_||PF00177
contig_162092_1161_2107_+	1374	9.8843	10.774	10.232	8.8064	11.041	9.7223	7.8176	8.8215	8.1897	7.9465	8.6907	8.5996	3.8771	2.8619	4.7128	1.744	1.7735	1.7178	10.2968	9.85657	8.27627	8.41227	3.81727	1.7451	0.448372	1.12333	0.507518	0.405929	0.9269	0.0278663	-0.138446	0	3.22e-05	2763	947	tps:THAPSDRAFT_8775	hypothetical protein						B8LC05					_GAP_||PF00326||_GAP_
contig_162376_1_861_+	1374	4.9422	4.8973	5.116	5.2838	5.9449	6.4815	4.4672	2.2054	3.0711	3.9733	3.9503	3.1271	7.7543	7.6316	7.5404	10.464	10.641	6.871	4.98517	5.9034	3.2479	3.68357	7.6421	9.32533	0.115508	0.599928	1.14122	0.482051	0.107336	2.12736	-0.115183	0	0.000112854	1142	861	pti:PHATR_43945	hypothetical protein						B5Y4V2
contig_162597_1_704_+	1374	0	0	0	0	0.84928	0.81019	0	0	0	1.5893	2.3702	1.5636	2.9078	3.8158	2.8277	5.2321	3.5469	6.871	0	0.553157	0	1.84103	3.18377	5.21667	0	0.479446	0	0.458452	0.54882	1.6621	0.4036	0.480772	0	2174	704	tps:THAPSDRAFT_31451	hypothetical protein						B8BRC8					_GAP_||PF00828
contig_16321_197_919_-	1374	6.919	3.9179	8.1856	4.4032	5.0957	4.051	6.7008	7.7188	5.1185	8.7412	5.5304	6.2542	4.8464	3.8158	3.7702	5.2321	5.3204	6.871	6.34083	4.51663	6.5127	6.84193	4.14413	5.80783	2.19181	0.531507	1.31032	1.68416	0.608608	0.921787	0.453906	0.992058	0	919	723	ppp:PHYPADRAFT_193235	RabB14; Rab2/RabB-family small GTPase; K07877 Ras-related protein Rab-2A		K07877	Ras-related protein Rab-2A	AMPK sigling pathway		A9TAX5	KOG0098	GTPase Rab2, small G protein superfamily	Intracellular trafficking, secretion, and vesicular transport	CELLULAR PROCESSES AND SIGLING	_GAP_||PF00071||_GAP_
contig_166876_181_937_-	1374	1.9769	4.8973	3.0696	0	0.84928	0	1.1168	1.1027	0	1.5893	0.79006	0.78178	7.7543	6.6777	7.5404	5.2321	8.8673	8.5888	3.3146	0.283093	0.739833	1.05371	7.32413	7.56273	1.47553	0.490332	0.640753	0.46385	0.569952	2.02319	0.543467	1	0	937	757	tps:THAPSDRAFT_27618	hypothetical protein; K02864 large subunit ribosomal protein L10	tps03010	K02864	large subunit ribosomal protein L10	Ribosome		B8BYW1					_GAP_||PF00466||_GAP_
contig_166959_211_1113_-	1374	8.8959	7.8357	7.1624	7.9257	6.7942	6.4815	0	1.1027	0	6.3572	7.1106	7.8178	8.7235	8.5856	11.311	15.696	14.188	13.742	7.96467	7.06713	0.367567	7.0952	9.54003	14.542	0.873916	0.759801	0.636644	0.730422	1.53525	1.02397	-0.155464	0	0	1114	903	olu:OSTLU_7124	hypothetical protein						A4S697					_GAP_||PF00121
contig_167953_16_747_+	1374	1.9769	1.9589	2.0464	2.6419	2.5478	1.6204	1.1168	1.1027	2.0474	1.5893	1.5801	2.3453	5.8157	4.7698	4.7128	8.7202	8.8673	8.5888	1.99407	2.27003	1.4223	1.83823	5.09943	8.72543	0.046207	0.564563	0.541398	0.439157	0.62096	0.139324	0.497739	0.964705	0	933	732	pti:PHATRDRAFT_45332	hypothetical protein						B7FXB4
contig_17494_75_458_+	1374	3.9537	3.9179	4.0928	4.4032	3.3971	4.051	2.2336	4.4108	4.0948	1.5893	1.5801	2.3453	0.96928	0.95395	0.94256	1.744	1.7735	0	3.98813	3.95043	3.57973	1.83823	0.955263	1.1725	0.0923945	0.510534	1.17644	0.439157	0.0134083	1.01552	0.711247	1	0	735	384	ppp:PHYPADRAFT_203227	hypothetical protein; K02151 V-type H+-transporting ATPase subunit F [EC:3.6.3.14]	ppp00190||ppp01100||ppp04145	K02151	V-type H+-transporting ATPase subunit F	Oxidative phosphorylation || Phagosome || Syptic vesicle cycle || Collecting duct acid secretion || Vibrio cholerae infection || Epithelial cell sigling in Helicobacter pylori infection || Rheumatoid arthritis	3.6.3.14	A9RKS6	KOG3432	Vacuolar H+-ATPase V1 sector, subunit F	Energy production and conversion	METABOLISM	PF01990
contig_186100_235_813_-	1374	3.9537	4.8973	6.1392	2.6419	5.0957	1.6204	1.1168	3.3081	3.0711	3.9733	2.3702	3.1271	2.9078	0.95395	0.94256	1.744	3.5469	0	4.99673	3.11933	2.49867	3.15687	1.60144	1.76363	1.09614	1.78616	1.20258	0.801964	1.13136	1.77353	0.456999	0.956331	0	1568	579	smm:Smp_039000	ATP synthase delta chain ; K02137 F-type H+-transporting ATPase oligomycin sensitivity conferral protein [EC:3.6.3.14]	smm00190||smm01100	K02137	F-type H+-transporting ATPase subunit O	Oxidative phosphorylation || Alzheimer's disease || Parkinson's disease || Huntington's disease	3.6.3.14	C4Q7S1	KOG1662	Mitochondrial F1F0-ATP synthase, subunit OSCP/ATP5	Energy production and conversion	METABOLISM	PF00213
contig_186631_868_1461_+	1374	2.9653	3.9179	4.0928	3.5225	2.5478	4.051	0	0	0	3.1786	3.1602	3.1271	0	0.95395	0.94256	1.744	1.7735	1.7178	3.65867	3.37377	0	3.1553	0.63217	1.7451	0.606808	0.762557	0	0.0260973	0.547505	0.0278663	0.479801	0.960969	0	2844	594
contig_186780_1_975_-	1374	0	0	0	0	0	0	0	0	0	1.5893	1.5801	0.78178	0.96928	0.95395	0.94256	1.744	3.5469	6.871	0	0	0	1.31706	0.955263	4.05397	0	0	0	0.463589	0.0134083	2.60084	-0.605319	1.07e-06	0.838916	975	975	zga:zobellia_3523	carbohydrate esterase / Alpha-galactosidase (EC:3.1.1.-)											PF03629||_GAP_
contig_190623_1_1079_+	1374	3.9537	3.9179	4.0928	4.4032	1.6986	1.6204	2.2336	2.2054	3.0711	6.3572	7.1106	6.2542	4.8464	3.8158	3.7702	8.7202	7.0938	5.1533	3.98813	2.57407	2.50337	6.574	4.14413	6.9891	0.0923945	1.58456	0.491874	0.467554	0.608608	1.78575	0.529659	0.865171	0	1080	1079	tps:THAPSDRAFT_22096	hypothetical protein						B8C108					_GAP_||PF04832
contig_190762_16_534_+	1374	3.9537	3.9179	3.0696	2.6419	3.3971	3.2408	4.4672	3.3081	5.1185	3.1786	2.3702	3.1271	1.9386	1.9079	1.8851	1.744	0	0	3.64707	3.09327	4.29793	2.89197	1.91053	0.581333	0.500421	0.398631	0.916993	0.452596	0.026847	1.0069	0.66062	1	0	646	519									KOG0865	Cyclophilin type peptidyl-prolyl cis-trans isomerase	Posttranslatiol modification, protein turnover, chaperones	CELLULAR PROCESSES AND SIGLING	PF00160
contig_200470_143_697_+	1374	2.9653	3.9179	4.0928	7.0451	5.9449	4.8611	0	2.2054	2.0474	12.714	13.431	11.727	6.785	7.6316	7.5404	3.4881	0	0	3.65867	5.95037	1.4176	12.624	7.319	1.1627	0.606808	1.09201	1.23022	0.855558	0.4647	2.01386	0.696824	1	0	1424	555	cre:CHLREDRAFT_24354	RPL21; ribosomal protein L21, component of cytosolic 80S ribosome and 60S large subunit; K02889 large subunit ribosomal protein L21e	cre03010	K02889	large subunit ribosomal protein L21e	Ribosome		A8J951	KOG1732	60S ribosomal protein L21	Translation, ribosomal structure and biogenesis	INFORMATION STORAGE AND PROCESSING	PF01157||_GAP_
contig_200941_124_1295_-	1374	19.769	17.63	21.487	17.613	17.835	17.014	29.037	31.978	28.664	13.509	12.641	12.508	22.293	22.895	24.506	26.161	31.922	29.202	19.6287	17.4873	29.893	12.886	23.2313	29.095	1.93233	0.424681	1.81527	0.543617	1.1442	2.88199	0.849641	1	0	1629	1172
contig_35158_131_743_-	1374	0	0	0	1.7613	1.6986	0.81019	2.2336	2.2054	5.1185	2.384	5.5304	5.4725	0.96928	0	0.94256	0	0	0	0	1.42336	3.18583	4.4623	0.63728	0	0	0.531948	1.6738	1.80009	0.552062	0	0.856854	1	0	743	613	ppp:PHYPADRAFT_185033	hypothetical protein; K02940 large subunit ribosomal protein L9e	ppp03010	K02940	large subunit ribosomal protein L9e	Ribosome		A9SHH6	KOG3255	60S ribosomal protein L9	Translation, ribosomal structure and biogenesis	INFORMATION STORAGE AND PROCESSING	PF00347
contig_40225_828_1414_-	1374	2.9653	2.9384	2.0464	7.0451	4.2464	4.8611	11.168	9.9242	10.237	8.7412	11.061	10.163	9.6928	12.401	10.368	1.744	0	1.7178	2.65003	5.3842	10.4431	9.9884	10.8206	1.15393	0.522935	1.47085	0.646999	1.16971	1.40969	0.999421	0.965706	1	0	1579	587									KOG3301	Ribosomal protein S4	Translation, ribosomal structure and biogenesis	INFORMATION STORAGE AND PROCESSING	PF00163||PF01479||_GAP_
contig_43856_54_518_+	1374	1.9769	2.9384	5.116	6.1644	7.6435	5.6713	10.051	9.9242	8.1897	10.33	10.271	7.8178	11.631	12.401	13.196	3.4881	3.5469	3.4355	3.34377	6.49307	9.3883	9.47293	12.4093	3.49017	1.60833	1.02636	1.03995	1.43369	0.782533	0.0557287	0.74659	1	0	805	465									KOG3311	Ribosomal protein S18	Translation, ribosomal structure and biogenesis	INFORMATION STORAGE AND PROCESSING	PF00416
contig_45961_1_492_+	1374	0	0	0	0	0	0	0	0	0	0.79465	0.79006	0.78178	0	0	0	5.2321	3.5469	5.1533	0	0	0	0.78883	0	4.6441	0	0	0	0.00652257	0	0.95102	1.57837	1	0	706	492
contig_56736_415_1556_-	1374	3.9537	3.9179	4.0928	4.4032	4.2464	4.8611	1.1168	1.1027	2.0474	5.5626	2.3702	3.1271	0.96928	0.95395	0.94256	1.744	1.7735	1.7178	3.98813	4.50357	1.4223	3.68663	0.955263	1.7451	0.0923945	0.319404	0.541398	1.66813	0.0134083	0.0278663	-0.0182571	0	0	1632	1142
contig_59651_987_1592_-	1374	1.9769	2.9384	4.0928	2.6419	2.5478	2.4306	2.2336	2.2054	3.0711	3.1786	3.1602	2.3453	0.96928	2.8619	1.8851	1.744	1.7735	1.7178	3.0027	2.5401	2.50337	2.8947	1.90543	1.7451	1.05941	0.10586	0.491874	0.475883	0.946474	0.0278663	-0.410118	0	0.516336	1621	606	acp:A2cp1_1286	arginine biosynthesis bifunctiol protein ArgJ (EC:2.3.1.1); K00620 glutamate N-acetyltransferase / amino-acid N-acetyltransferase [EC:2.3.1.35 2.3.1.1]	acp00330||acp01110||acp01100	K00620	glutamate N-acetyltransferase / amino-acid N-acetyltransferase [EC:2.3.1.35 2.3.1.1]	Arginine and proline metabolism || 2-Oxocarboxylic acid metabolism || Biosynthesis of amino acids	2.3.1.35||2.3.1.1	B8JGF9					_GAP_||PF01960
contig_9895_55_717_+	1374	26.688	28.404	30.696	30.822	33.122	32.408	30.154	26.465	30.711	22.25	25.282	26.581	32.956	32.434	33.932	47.089	47.883	42.944	28.596	32.1173	29.11	24.7043	33.1073	45.972	2.01089	1.17723	2.30751	2.22254	0.76038	2.65221	0.950828	1	0	915	663													_GAP_||PF05757
contig_109874_60_1201_+	1374	0.98843	2.9384	1.0232	2.6419	1.6986	1.6204	2.2336	2.2054	2.0474	2.384	1.5801	2.3453	1.9386	2.8619	1.8851	1.744	0	0	1.65001	1.98697	2.16213	2.10313	2.22853	0.581333	1.11591	0.568535	0.100357	0.453373	0.549164	1.0069	0.522718	0.99892	0	1516	1142	npu:Npun_R0752	histidinol-phosphate aminotransferase (EC:2.6.1.9); K00817 histidinol-phosphate aminotransferase [EC:2.6.1.9]	npu01110||npu01100||npu00400||npu00350||npu00360||npu00401||npu00340	K00817	histidinol-phosphate aminotransferase [EC:2.6.1.9]	Histidine metabolism || Tyrosine metabolism || Phenylalanine metabolism || Phenylalanine, tyrosine and tryptophan biosynthesis || Novobiocin biosynthesis || Tropane, piperidine and pyridine alkaloid biosynthesis || Biosynthesis of amino acids	2.6.1.9	B2IT06					PF00155
contig_114227_177_959_-	1374	2.9653	0	1.0232	0.88064	0	0.81019	0	0	0	0	0	0.78178	0	0	0	0	0	0	1.3295	0.56361	0	0.260593	0	0	1.50619	0.48937	0	0.451361	0	0	-1.54935	0	0.999998	1116	783
contig_134482_34_927_+	1374	2.9653	0.97947	1.0232	0.88064	0	0	0	0	0	3.1786	2.3702	2.3453	1.9386	1.9079	1.8851	3.4881	1.7735	3.4355	1.65599	0.293547	0	2.63137	1.91053	2.89903	1.13411	0.508438	0	0.474081	0.026847	0.975095	-0.00330149	0	0	1315	894	tps:THAPSDRAFT_9110	hypothetical protein						B8CAE2
contig_147429_1_1078_+	1374	0.98843	0.97947	1.0232	2.6419	0.84928	0	2.2336	2.2054	2.0474	2.384	2.3702	1.5636	2.9078	0.95395	2.8277	0	0	1.7178	0.997033	1.16373	2.16213	2.10593	2.22982	0.5726	0.0230996	1.34873	0.100357	0.469725	1.10566	0.991772	-0.328724	0	0.239712	1179	1078	ppp:PHYPADRAFT_136699	hypothetical protein; K13289 cathepsin A (carboxypeptidase C) [EC:3.4.16.5]		K13289	cathepsin A (carboxypeptidase C) [EC:3.4.16.5]	Lysosome || Renin-angiotensin system	3.4.16.5	A9SX32	KOG1282	Serine carboxypeptidases (lysosomal cathepsin A)	Posttranslatiol modification, protein turnover, chaperones	CELLULAR PROCESSES AND SIGLING	_GAP_||PF00450
contig_159090_1506_2656_-	1374	0	0.97947	0	0.88064	0	0.81019	1.1168	1.1027	2.0474	1.5893	0.79006	0.78178	0	0	0	0	0	0	0.32649	0.56361	1.4223	1.05371	0	0	0.565497	0.48937	0.541398	0.46385	0	0	0.299535	0.143711	0	2676	1151	ppp:PHYPADRAFT_200440	hypothetical protein; K01100 sedoheptulose-bisphosphatase [EC:3.1.3.37]	ppp00710||ppp01100	K01100	sedoheptulose-bisphosphatase [EC:3.1.3.37]	Carbon fixation in photosynthetic organisms || Carbon metabolism	3.1.3.37	A9U222	KOG1458	Fructose-1,6-bisphosphatase	Carbohydrate transport and metabolism	METABOLISM	_GAP_||PF00316
contig_159326_54_1055_+	1374	0	0	0	0	0.84928	0.81019	0	0	0	0.79465	1.5801	0	0	0	0	0	0	0	0	0.553157	0	0.791583	0	0	0	0.479446	0	0.790054	0	0	0.437707	0.895545	0	2314	1002													PF01012||_GAP_||PF00766||_GAP_
contig_162538_211_899_-	1374	0	0	1.0232	0	0	0	1.1168	1.1027	0	0	0	0	0.96928	2.8619	0.94256	1.744	0	1.7178	0.341067	0	0.739833	0	1.59125	1.15393	0.590745	0	0.640753	0	1.1005	0.999421	0.786556	0.999974	0	899	689	lch:Lcho_0417	3-dehydroquite dehydratase (EC:4.2.1.10); K03786 3-dehydroquite dehydratase II [EC:4.2.1.10]	lch00400||lch01110||lch01100	K03786	3-dehydroquite dehydratase II [EC:4.2.1.10]	Phenylalanine, tyrosine and tryptophan biosynthesis || Biosynthesis of amino acids	4.2.1.10	B1XX46					_GAP_||PF01220||_GAP_
contig_179345_912_3867_-	1374	0	0	0	0.88064	0.84928	0.81019	0	1.1027	1.0237	0.79465	0.79006	1.5636	2.9078	0.95395	2.8277	0	0	0	0	0.846703	0.7088	1.04944	2.22982	0	0	0.0352956	0.615108	0.445284	1.10566	0	-0.786369	0	1	5148	2956	pti:PHATRDRAFT_24195	CPS III, carbamoyl-phosphate synthase mitochindrial precursor; K01948 carbamoyl-phosphate synthase (ammonia) [EC:6.3.4.16]	pti01100||pti00330||pti00910||pti00250	K01948	carbamoyl-phosphate synthase (ammonia) [EC:6.3.4.16]	Alanine, aspartate and glutamate metabolism || Arginine and proline metabolism || Nitrogen metabolism || Carbon metabolism || Biosynthesis of amino acids	6.3.4.16	B7GEG8					_GAP_||PF00289||PF02786||_GAP_||PF02787||PF00289||PF02786||_GAP_
contig_179533_1_503_+	1374	0.98843	0.97947	1.0232	0.88064	0.84928	0.81019	0	0	0	1.5893	0.79006	2.3453	0	0	0	0	0	0	0.997033	0.846703	0	1.57489	0	0	0.0230996	0.0352956	0	0.77772	0	0	0.870806	1	0	1672	503
contig_186684_224_1149_+	1374	0.98843	0.97947	1.0232	1.7613	0	0.81019	1.1168	1.1027	2.0474	1.5893	0.79006	0	0.96928	0.95395	1.8851	1.744	0	0	0.997033	0.857163	1.4223	0.79312	1.26944	0.581333	0.0230996	0.881589	0.541398	0.794654	0.533229	1.0069	0.0233783	0	0	1318	926	tps:THAPSDRAFT_4049	hypothetical protein						B8BWQ1
contig_198803_1_708_+	1374	0	0	0	0	0	0	2.2336	2.2054	2.0474	0	0	0	0	0.95395	0.94256	0	0	0	0	0	2.16213	0	0.63217	0	0	0	0.100357	0	0.547505	0	-0.517938	0	0.983975	947	708
contig_199348_204_2074_-	1374	0	0	0	1.7613	0	0	1.1168	2.2054	1.0237	3.9733	1.5801	1.5636	0	0	0	0	0	0	0	0.5871	1.44863	2.37233	0	0	0	1.01689	0.65703	1.3865	0	0	-0.00608542	0	0	2146	1871	nve:NEMVE_v1g246966	hypothetical protein ; K02145 V-type H+-transporting ATPase subunit A [EC:3.6.3.14]	nve04145||nve00190||nve01100	K02145	V-type H+-transporting ATPase subunit A [EC:3.6.3.14]	Oxidative phosphorylation || Phagosome || Syptic vesicle cycle || Collecting duct acid secretion || Vibrio cholerae infection || Epithelial cell sigling in Helicobacter pylori infection || Rheumatoid arthritis	3.6.3.14	A7SRN1	KOG1352	Vacuolar H+-ATPase V1 sector, subunit A	Energy production and conversion	METABOLISM	PF02874||_GAP_||PF00006||PF00306
contig_201011_1_667_-	1374	0	0	0	0	0	0	0	0	0	0	0	0	1.9386	0.95395	1.8851	0	0	0	0	0	0	0	1.59255	0	0	0	0	0	0.55369	0	0.10883	0.00159443	0	745	667
contig_31840_1_1134_+	1374	1.9769	0.97947	2.0464	1.7613	0.84928	1.6204	1.1168	1.1027	2.0474	2.384	1.5801	3.1271	1.9386	1.9079	1.8851	0	0	0	1.66759	1.41033	1.4223	2.36373	1.91053	0	0.596942	0.490962	0.541398	0.773699	0.026847	0	0.561845	1	0	3120	1134	fsy:FsymDg_3402	cobalamin synthesis protein P47K											PF02492||_GAP_||PF07683||_GAP_
contig_44301_1_800_+	1374	0.98843	0	1.0232	1.7613	1.6986	0.81019	2.2336	1.1027	3.0711	1.5893	0.79006	0.78178	0.96928	0.95395	0.94256	1.744	1.7735	1.7178	0.670543	1.42336	2.1358	1.05371	0.955263	1.7451	0.580968	0.531948	0.987838	0.46385	0.0134083	0.0278663	0.487461	0.78855	0	1068	800	ppp:PHYPADRAFT_114138	hypothetical protein							KOG0257	Kynurenine aminotransferase, glutamine transamise K	Amino acid transport and metabolism	METABOLISM	PF00155
contig_103467_1_999_+	1871	0	0	0	0	0	0	0	0	0	0.93805	0	1.0641	1.476	1.6456	1.4449	5.8103	8.8344	6.5444	0	0	0	0.667383	1.52217	7.06303	0	0	0	0.581397	0.108021	1.57735	1.58817	1	0	1199	999	pti:PHATRDRAFT_10068	FABI; enoyl-acp reductase; K00208 enoyl-[acyl-carrier protein] reductase I [EC:1.3.1.9]	pti01100||pti00061	K00208	enoyl-[acyl-carrier protein] reductase I [EC:1.3.1.9 1.3.1.10]	Fatty acid biosynthesis || Biotin metabolism || Fatty acid metabolism	1.3.1.9	B7FS72	KOG0725	Reductases with broad range of substrate specificities	General function prediction only	POORLY CHARACTERIZED	_GAP_||PF13561
contig_112181_180_1912_+	1871	0	0	0	0	0	0	0	0	0	0	0	0	3.69	4.9367	5.0573	15.978	16.866	13.743	0	0	0	0	4.56133	15.529	0	0	0	0	0.757002	1.60919	5.1213	1	0	2070	1733
contig_14972_951_2648_-	1871	0	0	0	0	0	0	0	0	0	0.93805	1.3146	2.1282	2.214	2.4684	2.8899	4.3577	3.2125	3.9266	0	0	0	1.46028	2.5241	3.83227	0	0	0	0.608303	0.341375	0.578399	1.84372	1	0	2650	1698	pti:PHATRDRAFT_54465	ISIP2A; iron starvation induced protein						B7FYL2					_GAP_||PF07692
contig_41610_1_686_+	1871	0	0	0	3.5751	3.5552	6.5314	0	0	0	0	0	0	0	0	0	0	0	0	0	4.5539	0	0	0	0	0	1.71259	0	0	0	0	0.816515	1	0	2691	686													_GAP_||PF00504
contig_67380_310_5018_-	1871	19.297	24.142	21.392	7.1502	7.1103	6.5314	14.336	10.608	17.263	8.4425	7.8877	6.3846	0	0.82279	0	0	0	0	21.6103	6.93063	14.069	7.5716	0.274263	0	2.42987	0.346321	3.33552	1.06474	0.475038	0	-1.94802	0	1	5023	4709	rrs:RoseRS_0010	WD40 domain-containing protein						A5UPA0
contig_104357_224_994_-	1871	0.77189	0	0	0	0	0	1.4336	0	0	1.8761	0	0	2.214	0	1.4449	2.1789	0	1.3089	0.257297	0	0.477867	0.625367	1.21963	1.1626	0.445651	0	0.827689	1.08317	1.12406	1.09679	0.702581	0.999664	0	2433	771	olu:OSTLU_28057	hypothetical protein; K01057 6-phosphogluconolactose [EC:3.1.1.31]	olu01110||olu00030||olu01100	K01057	6-phosphogluconolactose [EC:3.1.1.31]	Pentose phosphate pathway || Carbon metabolism	3.1.1.31	A4S930	KOG3147	6-phosphogluconolactose - like protein	Carbohydrate transport and metabolism	METABOLISM	PF01182||_GAP_
contig_117625_318_968_-	1871	0	0	0	0	0	0	0	0	0	0.93805	0	0	2.214	1.6456	2.1674	1.4526	0	1.3089	0	0	0	0.312683	2.009	0.9205	0	0	0	0.541583	0.315575	0.800408	0.886903	1	0	1172	651									KOG0087	GTPase Rab11/YPT3, small G protein superfamily	Intracellular trafficking, secretion, and vesicular transport	CELLULAR PROCESSES AND SIGLING	PF00071||_GAP_
contig_121299_1_484_-	1871	1.5438	0	0	0	0	0	0	0	0	0	0	0	0	0	0	0	0	0	0.5146	0	0	0	0	0	0.891313	0	0	0	0	0	0.670455	0.99821	0	532	484	pti:PHATRDRAFT_46347	hypothetical protein						B7G0W9					_GAP_||PF05981
contig_125260_1_814_-	1871	0	0	0	0	0	0	0	0	0	0	0	0	1.476	0.82279	2.8899	2.1789	1.6063	1.3089	0	0	0	0	1.72956	1.69803	0	0	0	0	1.05663	0.442195	3.22323	1	1.67e-51	863	814
contig_41527_45_1819_+	1871	0	0	0	0	0	0	0	0	0	0	0	0	0.738	1.6456	1.4449	0	0	0	0	0	0	0	1.27617	0	0	0	0	0	0.476747	0	0.869674	1	0	1929	1775									KOG0625	Phosphoglucomutase	Carbohydrate transport and metabolism	METABOLISM	PF02878||_GAP_||PF02879||PF02880||PF00408||_GAP_
contig_43676_411_1252_+	1871	6.947	1.8571	0	1.7875	0	0	0	0	0	0	0	0	0	0	0	0	0	0	2.9347	0.595833	0	0	0	0	3.59668	1.03201	0	0	0	0	2.38504	1	1.67e-40	1377	842	cyc:PCC7424_3706	rplB; 50S ribosomal protein L2; K02886 large subunit ribosomal protein L2	cyc03010	K02886	large subunit ribosomal protein L2	Ribosome		B7KHZ0					_GAP_||PF00181||PF03947
contig_45216_214_1487_-	1871	0	0	0	4.4689	2.3701	1.3063	0	0	0	0	0	0	0	0	0	0	0	0	0	2.7151	0	0	0	0	0	1.60928	0	0	0	0	-0.265756	0	0.002846	1533	1274	tps:THAPSDRAFT_24887	phosphoadenosine-phosphosulphate reductase						B8CCL3					_GAP_||PF01507||_GAP_||PF00085
contig_46314_1245_1937_-	1871	0.77189	0	0	0	0	0	0	0	0	1.8761	0	0	0	0	0	2.1789	1.6063	1.9633	0.257297	0	0	0.625367	0	1.91617	0.445651	0	0	1.08317	0	0.289195	1.0767	1	0	2515	693									KOG0455	Homoserine dehydrogese	Amino acid transport and metabolism	METABOLISM	PF00742
contig_68429_12_1394_-	1871	1.5438	0	1.9448	0	0	0	0	0	1.4386	1.8761	0	0	0.738	0.82279	0.72247	0.72629	1.6063	0.65444	1.16287	0	0.479533	0.625367	0.761087	0.995677	1.02684	0	0.830576	1.08317	0.0539979	0.530034	1.51854	1	0	1395	1383	ote:Oter_0692	arginine biosynthesis bifunctiol protein ArgJ (EC:2.3.1.35); K00620 glutamate N-acetyltransferase / amino-acid N-acetyltransferase [EC:2.3.1.35 2.3.1.1]	ote00330||ote01110||ote01100	K00620	glutamate N-acetyltransferase / amino-acid N-acetyltransferase [EC:2.3.1.35 2.3.1.1]	Arginine and proline metabolism || 2-Oxocarboxylic acid metabolism || Biosynthesis of amino acids	2.3.1.35||2.3.1.1	B1ZUD8					_GAP_||PF01960
contig_73428_1_782_+	1871	0	0	0	1.7875	2.3701	1.3063	0	0	0	0.93805	0	1.0641	0	0	0	0	0	0.65444	0	1.8213	0	0.667383	0	0.218147	0	0.532705	0	0.581397	0	0.377841	0.687461	1	0	1058	782									KOG1646	40S ribosomal protein S6	Translation, ribosomal structure and biogenesis	INFORMATION STORAGE AND PROCESSING	PF01092||_GAP_
contig_82553_1_747_-	1871	0	0	0	0	0	0	0	0	0	0	0	0	0	0	0	1.4526	0	0	0	0	0	0	0	0.4842	0	0	0	0	0	0.838659	1.46587	1	0	747	747	tps:THAPSDRAFT_34125	hypothetical protein						B8C250					PF10563||_GAP_
contig_10399_69_440_+	1374	2.9653	3.9179	3.0696	4.4032	3.3971	3.2408	2.2336	2.2054	2.0474	3.1786	3.1602	3.1271	1.9386	1.9079	1.8851	5.2321	5.3204	5.1533	3.3176	3.68037	2.16213	3.1553	1.91053	5.23527	0.522484	0.630851	0.100357	0.0260973	0.026847	0.083595	0.842628	1	0	2622	372													_GAP_||PF00313
contig_108537_178_1598_-	1374	2.9653	0.97947	3.0696	9.687	5.0957	4.051	2.2336	7.7188	10.237	3.9733	6.3205	2.3453	3.8771	4.7698	4.7128	0	0	1.7178	2.33812	6.2779	6.7298	4.21303	4.45323	0.5726	1.17778	2.99822	4.09233	1.99841	0.499759	0.991772	0.491961	0.99756	0	1937	1421									KOG2666	UDP-glucose/GDP-mannose dehydrogese	Carbohydrate transport and metabolism	METABOLISM	PF03721||PF00984||PF03720
contig_109071_255_1366_-	1374	2.9653	2.9384	3.0696	0.88064	1.6986	1.6204	0	1.1027	1.0237	1.5893	2.3702	2.3453	3.8771	4.7698	4.7128	8.7202	7.0938	8.5888	2.9911	1.39988	0.7088	2.1016	4.45323	8.13427	0.0693007	0.451372	0.615108	0.443839	0.499759	0.903463	-0.47853	0	0.948321	1463	1112	pti:PHATRDRAFT_bd542	CysK; hypothetical protein; K01738 cysteine synthase A [EC:2.5.1.47]	pti01100||pti00920||pti00270	K01738	cysteine synthase A [EC:2.5.1.47]	Cysteine and methionine metabolism || Sulfur metabolism || Carbon metabolism || Biosynthesis of amino acids	2.5.1.47	B7S487					_GAP_||PF00291
contig_109329_236_1090_-	1374	10.873	12.733	10.232	4.4032	4.2464	4.8611	3.3504	5.5134	6.1423	5.5626	7.1106	4.6907	0.96928	1.9079	1.8851	3.4881	3.5469	3.4355	11.2793	4.50357	5.00203	5.78797	1.58743	3.49017	1.29907	0.319404	1.46451	1.22559	0.535452	0.0557287	0.860173	1	0	1091	855	tps:THAPSDRAFT_8968	hypothetical protein						B8CA04	KOG4470	Proteasome activator subunit	Posttranslatiol modification, protein turnover, chaperones	CELLULAR PROCESSES AND SIGLING	_GAP_||PF02252
contig_109463_69_873_-	1374	1.9769	4.8973	5.116	1.7613	2.5478	2.4306	0	0	0	5.5626	3.9503	3.1271	0	0	0	0	0	0	3.99673	2.24657	0	4.21333	0	0	1.75264	0.424319	0	1.23887	0	0	0.510494	0.998228	0	873	805	olu:OSTLU_12518	hypothetical protein; K00939 adenylate kise [EC:2.7.4.3]	olu01110||olu00230||olu01100	K00939	adenylate kise [EC:2.7.4.3]	Purine metabolism	2.7.4.3	A4RX06	KOG3078	Adenylate kise	Nucleotide transport and metabolism	METABOLISM	_GAP_||PF00406
contig_111681_200_839_-	1374	4.9422	5.8768	4.0928	4.4032	7.6435	5.6713	7.8176	9.9242	8.1897	5.5626	6.3205	6.2542	4.8464	4.7698	3.7702	3.4881	7.0938	5.1533	4.9706	5.906	8.64383	6.04577	4.46213	5.24507	0.892339	1.63285	1.12433	0.419746	0.600455	1.8046	0.541494	0.990905	0	839	640	tps:THAPSDRAFT_31785	hypothetical protein; K03152 4-methyl-5(b-hydroxyethyl)-thiazole monophosphate biosynthesis		K03152	4-methyl-5(b-hydroxyethyl)-thiazole monophosphate biosynthesis			B8BUW9					_GAP_||PF01965
contig_132760_1_1056_+	1374	0.98843	2.9384	3.0696	5.2838	3.3971	4.8611	2.2336	2.2054	1.0237	1.5893	0.79006	0.78178	0	0	0	0	0	0	2.33214	4.514	1.8209	1.05371	0	0	1.16554	0.990085	0.690539	0.46385	0	0	-4.08952	0	1	6846	1056	geo:Geob_3131	fibronectin type III domain protein						B9M3Q3
contig_132760_4047_5081_+	1374	2.9653	3.9179	4.0928	6.1644	4.2464	4.8611	4.4672	3.3081	3.0711	1.5893	1.5801	1.5636	0	0	0	0	0	0	3.65867	5.09063	3.61547	1.57767	0	0	0.606808	0.979385	0.747081	0.0130216	0	0	-5.10202	0	1	6846	1035	pti:PHATR_46929	hypothetical protein						B5Y488
contig_132767_3435_3923_+	1374	1.9769	1.9589	2.0464	4.4032	4.2464	3.2408	2.2336	3.3081	2.0474	2.384	1.5801	2.3453	1.9386	1.9079	2.8277	1.744	1.7735	1.7178	1.99407	3.96347	2.5297	2.10313	2.22473	1.7451	0.046207	0.630739	0.680513	0.453373	0.52241	0.0278663	0.166014	0	0	4121	489	pti:PHATRDRAFT_32684	hypothetical protein						B7FSC1
contig_133447_988_1743_-	1374	1.9769	1.9589	2.0464	2.6419	1.6986	0.81019	2.2336	2.2054	3.0711	3.9733	3.9503	3.1271	2.9078	3.8158	3.7702	0	1.7735	0	1.99407	1.7169	2.50337	3.68357	3.49793	0.591167	0.046207	0.915992	0.491874	0.482051	0.511579	1.02393	-0.348516	0	0.0324713	2623	756	tps:THAPSDRAFT_21918	hypothetical protein						B8BYQ9					_GAP_||PF01145
contig_137333_85_441_-	1374	0	0.97947	1.0232	1.7613	1.6986	2.4306	2.2336	2.2054	2.0474	2.384	3.1602	2.3453	1.9386	1.9079	2.8277	1.744	3.5469	5.1533	0.667557	1.9635	2.16213	2.62983	2.22473	3.4814	0.578534	0.405733	0.100357	0.459718	0.52241	1.70559	1.10853	1	0	1009	357	ppp:PHYPADRAFT_139008	hypothetical protein; K02942 large subunit ribosomal protein LP1	ppp03010	K02942	large subunit ribosomal protein LP1	Ribosome		A9T1W7	KOG1762	60s acidic ribosomal protein P1	Translation, ribosomal structure and biogenesis	INFORMATION STORAGE AND PROCESSING	PF00428
contig_137539_177_449_-	1374	2.9653	3.9179	3.0696	0.88064	0.84928	0	3.3504	2.2054	2.0474	0.79465	0.79006	0	2.9078	2.8619	2.8277	1.744	1.7735	1.7178	3.3176	0.57664	2.5344	0.528237	2.8658	1.7451	0.522484	0.499631	0.711079	0.457472	0.0401922	0.0278663	1.32467	1	0	543	273	ppp:PHYPADRAFT_106560 || ppp:PHYPADRAFT_110323	hypothetical protein; K11097 small nuclear ribonucleoprotein E || hypothetical protein	ppp03040	K11097	small nuclear ribonucleoprotein E	Spliceosome		A9SJB1	KOG1774	Small nuclear ribonucleoprotein E	R processing and modification	INFORMATION STORAGE AND PROCESSING	PF01423
contig_140163_54_625_+	1374	9.8843	9.7947	11.255	7.9257	5.9449	7.2917	4.4672	4.4108	3.0711	1.5893	0.79006	1.5636	0.96928	0	0.94256	0	0	0	10.3113	7.0541	3.98303	1.31432	0.63728	0	0.818466	1.01155	0.790261	0.454204	0.552062	0
contig_1434_148_1069_-	1374	0.98843	0.97947	0	0	0	0	0	1.1027	0	3.1786	3.9503	4.6907	0.96928	0	0	0	0	0	0.655967	0	0.367567	3.93987	0.323093	0	0.568101	0	0.636644	0.756104	0.559614	0	0.594112	0.999934	0	1070	922	tps:THAPSDRAFT_269759	hypothetical protein						B8CCD1					_GAP_||PF05879||_GAP_
contig_144247_83_565_-	1374	5.9306	4.8973	6.1392	4.4032	5.0957	5.6713	4.4672	3.3081	3.0711	11.92	11.851	11.727	7.7543	8.5856	9.4256	5.2321	7.0938	6.871	5.6557	5.05673	3.61547	11.8327	8.5885	6.39897	0.665024	0.634947	0.747081	0.0977974	0.835654	1.01666	0.886766	1	0	608	483	ppp:PHYPADRAFT_187092	hypothetical protein; K02901 large subunit ribosomal protein L27e	ppp03010	K02901	large subunit ribosomal protein L27e	Ribosome		A9SPG7	KOG3418	60S ribosomal protein L27	Translation, ribosomal structure and biogenesis	INFORMATION STORAGE AND PROCESSING	_GAP_||PF01777
contig_145905_97_933_-	1374	0.98843	1.9589	2.0464	3.5225	2.5478	1.6204	3.3504	3.3081	4.0948	5.5626	5.5304	5.4725	2.9078	2.8619	3.7702	0	1.7735	0	1.66458	2.56357	3.58443	5.52183	3.17997	0.591167	0.587192	0.951148	0.442496	0.0456568	0.511672	1.02393	0.724246	1	0	1032	837	vcn:VOLCADRAFT_109242	rps2; component of cytosolic 80S ribosome and 40S small subunit; K02981 small subunit ribosomal protein S2e							KOG0877	40S ribosomal protein S2/30S ribosomal protein S5	Translation, ribosomal structure and biogenesis	INFORMATION STORAGE AND PROCESSING	_GAP_||PF00333||PF03719||_GAP_
contig_148482_46_2122_+	1374	0	0	0	0.88064	0.84928	0.81019	0	1.1027	2.0474	2.384	2.3702	3.9089	3.8771	3.8158	5.6553	1.744	1.7735	3.4355	0	0.846703	1.05003	2.8877	4.4494	2.31767	0	0.0352956	1.02472	0.884412	1.04479	0.968184	0.81753	1	0	2366	2077	pti:PHATRDRAFT_41702	hypothetical protein; K01694 tryptophan synthase [EC:4.2.1.20]	pti01100||pti00400||pti00260||pti01110	K01694	tryptophan synthase [EC:4.2.1.20]	Glycine, serine and threonine metabolism || Phenylalanine, tyrosine and tryptophan biosynthesis || Biosynthesis of amino acids	4.2.1.20	B7FQI2					PF00290||_GAP_||PF00291
contig_149051_102_932_-	1374	0.98843	1.9589	1.0232	2.6419	2.5478	4.051	3.3504	4.4108	2.0474	7.1519	6.3205	5.4725	6.785	5.7237	5.6553	1.744	3.5469	1.7178	1.32351	3.08023	3.26953	6.31497	6.05467	2.33623	0.550538	0.842024	1.18377	0.839714	0.633411	1.04855	0.642061	1	0	1396	831									KOG0746	60S ribosomal protein L3 and related proteins	Translation, ribosomal structure and biogenesis	INFORMATION STORAGE AND PROCESSING	PF00297||_GAP_
contig_157893_262_1430_-	1374	6.919	7.8357	6.1392	6.1644	9.342	6.4815	1.1168	2.2054	2.0474	7.1519	7.1106	8.5996	3.8771	3.8158	3.7702	5.2321	3.5469	3.4355	6.96463	7.3293	1.78987	7.6207	3.82103	4.0715	0.84917	1.75025	0.588222	0.848004	0.0536418	1.00665	0.187387	0	0	1431	1169	pti:PHATRDRAFT_43716	hypothetical protein						B7FT77
contig_158990_1891_3979_-	1374	3.9537	2.9384	3.0696	4.4032	3.3971	2.4306	11.168	9.9242	10.237	4.7679	5.5304	6.2542	13.57	12.401	12.253	17.44	14.188	12.024	3.32057	3.4103	10.4431	5.5175	12.7413	14.5507	0.55222	0.986366	0.646999	0.743234	0.721452	2.72615	-0.468386	0	0.999823	4282	2089	isc:IscW_ISCW001647	hypothetical protein		K15377	solute carrier family 44 (choline transporter-like protein), member 2/4/5			B7P7C4	KOG1362	Choline transporter-like protein	Lipid transport and metabolism	METABOLISM	_GAP_||PF04515||_GAP_
contig_159085_1_764_+	1374	10.873	10.774	12.278	13.21	12.739	13.773	7.8176	11.027	11.261	13.509	13.431	13.29	5.8157	5.7237	7.5404	3.4881	5.3204	6.871	11.3083	13.2407	10.0352	13.41	6.35993	5.2265	0.841214	0.517682	1.92406	0.111	1.02335	1.6934	0.744646	1	0	1063	764													_GAP_||PF00926
contig_159115_257_922_-	1374	0	0	0	0	0	0	0	0	0	2.384	0	1.5636	8.7235	8.5856	11.311	22.673	23.055	20.613	0	0	0	1.31587	9.54003	22.1137	0	0	0	1.21115	1.53525	1.31358	0.478203	0.988165	0	1040	666	ppp:PHYPADRAFT_17333	hypothetical protein						A9TAZ7					PF00573
contig_161830_121_2000_+	1374	7.9075	5.8768	8.1856	8.8064	7.6435	7.2917	3.3504	3.3081	3.0711	5.5626	5.5304	4.6907	9.6928	10.493	8.483	1.744	1.7735	1.7178	7.3233	7.91387	3.2432	5.26123	9.55627	1.7451	1.2604	0.792719	0.150536	0.494359	1.01193	0.0278663	-0.61175	0	1	4581	1880									KOG1362	Choline transporter-like protein	Lipid transport and metabolism	METABOLISM	_GAP_||PF04515
contig_166753_157_979_-	1374	23.722	24.487	22.51	9.687	10.191	12.963	14.518	11.027	15.356	11.92	10.271	10.945	12.601	11.447	14.138	10.464	8.8673	8.5888	23.573	10.947	13.6337	11.0453	12.7287	9.3067	0.996887	1.764	2.296	0.829066	1.35003	1.01188	0.339209	2.74e-06	0	979	823	pti:PHATRDRAFT_25308	TPI/GapC3; triosephosphate isomerase/glyceraldehyde-3-phosphate dehydrogese precursor; K00134 glyceraldehyde 3-phosphate dehydrogese [EC:1.2.1.12]	pti01100||pti00010||pti01110	K00134	glyceraldehyde 3-phosphate dehydrogese [EC:1.2.1.12]	Glycolysis / Gluconeogenesis || Carbon fixation in photosynthetic organisms || Carbon metabolism || Biosynthesis of amino acids || HIF-1 sigling pathway || Alzheimer's disease	1.2.1.12	B7FSI3	KOG1643	Triosephosphate isomerase	Carbohydrate transport and metabolism	METABOLISM	PF00121
contig_17092_128_1132_-	1374	7.9075	8.8152	7.1624	7.0451	5.9449	4.8611	5.584	7.7188	7.166	9.5358	9.4807	9.3814	20.355	19.079	18.851	20.929	23.055	18.895	7.9617	5.95037	6.82293	9.46597	19.4283	20.9597	0.827732	1.09201	1.10798	0.0782473	0.810573	2.08017	0.884567	1	0	1133	1005	pti:PHATRDRAFT_37468	hypothetical protein						B7G3W5
contig_171812_1_461_+	1374	2.9653	3.9179	4.0928	2.6419	3.3971	2.4306	3.3504	2.2054	3.0711	3.9733	3.9503	3.1271	2.9078	1.9079	0.94256	1.744	1.7735	1.7178	3.65867	2.8232	2.87563	3.68357	1.91942	1.7451	0.606808	0.508117	0.597002	0.482051	0.982671	0.0278663	0.672049	0.999972	0	674	461									KOG0907	Thioredoxin	Posttranslatiol modification, protein turnover, chaperones	CELLULAR PROCESSES AND SIGLING	_GAP_||PF00085
contig_181057_1_512_+	1374	1.9769	1.9589	2.0464	4.4032	5.0957	4.051	2.2336	1.1027	2.0474	4.7679	4.7404	5.4725	0.96928	0.95395	0	1.744	0	0	1.99407	4.51663	1.79457	4.9936	0.641077	0.581333	0.046207	0.531507	0.606364	0.414967	0.555242	1.0069	-0.0120382	0	0	755	512	cre:CHLREDRAFT_184730 || cre:CHLREDRAFT_184731	LHCSR3; stress-related chlorophyll a/b binding protein 3; K08907 light-harvesting complex I chlorophyll a/b binding protein 1 || LHCSR2; stress-related chlorophyll a/b binding protein 2	cre00196	K08907	light-harvesting complex I chlorophyll a/b binding protein 1	Photosynthesis - anten proteins		A8J431					PF00504
contig_188492_1_608_+	1374	1.9769	0.97947	2.0464	0.88064	0.84928	1.6204	3.3504	3.3081	3.0711	1.5893	3.1602	3.1271	2.9078	4.7698	4.7128	5.2321	5.3204	3.4355	1.66759	1.11677	3.2432	2.62553	4.13013	4.66267	0.596942	0.436435	0.150536	0.897557	1.05896	1.06367	0.658004	0.992214	0	1220	608	pti:PHATRDRAFT_33844	hypothetical protein						B7FU11					PF01789
contig_189887_158_1512_+	1374	7.9075	7.8357	4.0928	15.851	18.684	17.824	21.219	22.054	20.474	11.92	11.851	10.945	4.8464	4.7698	4.7128	0	0	0	6.612	17.453	21.249	11.572	4.77633	0	2.18199	1.45248	0.790427	0.544093	0.0670392	0	-0.407775	0	0.651907	1521	1355	vcn:VOLCADRAFT_109786 || vcn:VOLCADRAFT_77526	tubA2; alpha tubulin; K07374 tubulin alpha || tubA1; alpha tubulin							KOG1376	Alpha tubulin	Cytoskeleton	CELLULAR PROCESSES AND SIGLING	PF00091||_GAP_||PF03953||_GAP_
contig_19325_204_653_+	1374	0.98843	2.9384	3.0696	2.6419	3.3971	4.051	3.3504	2.2054	1.0237	5.5626	4.7404	5.4725	2.9078	2.8619	3.7702	0	0	0	2.33214	3.36333	2.19317	5.2585	3.17997	0	1.16554	0.705157	1.1634	0.450944	0.511672	0	1.09836	1	0	830	450	ppp:PHYPADRAFT_49186	hypothetical protein; K02903 large subunit ribosomal protein L28e	ppp03010	K02903	large subunit ribosomal protein L28e	Ribosome		A9SNS5	KOG3412	60S ribosomal protein L28	Translation, ribosomal structure and biogenesis	INFORMATION STORAGE AND PROCESSING	PF01778
contig_199100_1127_1890_-	1374	5.9306	5.8768	3.0696	5.2838	4.2464	6.4815	7.8176	6.6161	6.1423	4.7679	3.9503	3.9089	7.7543	8.5856	4.7128	8.7202	7.0938	8.5888	4.959	5.33723	6.85867	4.20903	7.01757	8.13427	1.63649	1.11851	0.863589	0.484435	2.03881	0.903463	0.272607	0.142746	0	1891	764
contig_201619_47_1620_+	1374	5.9306	3.9179	6.1392	5.2838	6.7942	6.4815	5.584	5.5134	6.1423	6.3572	6.3205	8.5996	14.539	13.355	14.138	10.464	12.414	13.742	5.32923	6.1865	5.74657	7.09243	14.0107	12.2067	1.22669	0.797243	0.344528	1.30537	0.602183	1.64881	-0.0329734	4.93e-08	1.49e-05	1888	1574	tbr:Tb10.70.5820	hexokise (EC:2.7.1.1); K00844 hexokise [EC:2.7.1.1]	tbr00051||tbr00500||tbr01100||tbr01110||tbr00520||tbr00010||tbr00052	K00844	hexokise [EC:2.7.1.1]	Glycolysis / Gluconeogenesis || Fructose and mannose metabolism || Galactose metabolism || Starch and sucrose metabolism || Amino sugar and nucleotide sugar metabolism || Streptomycin biosynthesis || Butirosin and neomycin biosynthesis || Carbon metabolism || HIF-1 sigling pathway || Insulin sigling pathway || Type II diabetes mellitus || Carbohydrate digestion and absorption	2.7.1.1	Q38C42	KOG1369	Hexokise	Carbohydrate transport and metabolism	METABOLISM	_GAP_||PF00349||PF03727
contig_32803_1_1086_+	1374	7.9075	7.8357	10.232	10.568	11.041	10.532	14.518	24.259	17.403	7.1519	5.5304	6.2542	8.7235	9.5395	11.311	3.4881	7.0938	5.1533	8.6584	10.7137	18.7267	6.31217	9.858	5.24507	1.36325	0.28405	5.00358	0.812303	1.32283	1.8046	-1.03319	0	1	1214	1086
contig_33851_1_616_+	1374	12.85	12.733	10.232	11.448	11.89	11.343	15.635	14.335	13.308	9.5358	13.431	11.727	11.631	13.355	13.196	19.185	15.961	13.742	11.9383	11.5603	14.426	11.5646	12.7273	16.296	1.47889	0.290287	1.16617	1.95267	0.952775	2.73692	0.685539	1	0	915	616	pti:PHATRDRAFT_9046	hypothetical protein						B7FPI8					_GAP_||PF13806
contig_55799_121_678_+	1374	2.9653	2.9384	3.0696	3.5225	2.5478	4.051	3.3504	4.4108	3.0711	4.7679	5.5304	5.4725	2.9078	3.8158	3.7702	1.744	1.7735	1.7178	2.9911	3.37377	3.61077	5.25693	3.49793	1.7451	0.0693007	0.762557	0.706783	0.424504	0.511579	0.0278663	1.23812	1	0	860	558	ppp:PHYPADRAFT_204626	hypothetical protein	ppp03010	K02966	small subunit ribosomal protein S19e	Ribosome		A9RQ90	KOG3411	40S ribosomal protein S19	Translation, ribosomal structure and biogenesis	INFORMATION STORAGE AND PROCESSING	_GAP_||PF01090
contig_62772_198_419_-	1374	0	0.97947	1.0232	0.88064	0.84928	0.81019	0	0	0	3.1786	2.3702	2.3453	4.8464	3.8158	3.7702	1.744	0	0	0.667557	0.846703	0	2.63137	4.14413	0.581333	0.578534	0.0352956	0	0.474081	0.608608	1.0069	1.0323	1	0	743	222	ppp:PHYPADRAFT_183322 || ppp:PHYPADRAFT_178018 || ppp:PHYPADRAFT_210714	hypothetical protein; K12845 U4/U6 small nuclear ribonucleoprotein SNU13 || hypothetical protein; K12845 U4/U6 small nuclear ribonucleoprotein SNU13 || hypothetical protein; K12845 U4/U6 small nuclear ribonucleoprotein SNU13	ppp03040||ppp03008	K12845	U4/U6 small nuclear ribonucleoprotein SNU13	Ribosome biogenesis in eukaryotes || Spliceosome		A9RTP6	KOG3387	60S ribosomal protein 15.5kD/SNU13, NHP2/L7A family (includes ribonuclease P subunit p38), involved in splicing	R processing and modification	INFORMATION STORAGE AND PROCESSING	PF01248
contig_82037_106_1145_+	1374	0.98843	0.97947	0	0.88064	0.84928	2.4306	2.2336	3.3081	1.0237	0.79465	1.5801	0.78178	4.8464	4.7698	4.7128	3.4881	1.7735	3.4355	0.655967	1.38684	2.18847	1.05218	4.77633	2.89903	0.568101	0.904059	1.14287	0.45724	0.0670392	0.975095	-0.281838	0	0.0335825	1146	1040
contig_84070_1_835_-	1374	4.9422	5.8768	7.1624	5.2838	5.9449	5.6713	3.3504	4.4108	3.0711	1.5893	1.5801	1.5636	1.9386	2.8619	2.8277	0	1.7735	1.7178	5.9938	5.63333	3.61077	1.57767	2.54273	1.16377	1.11471	0.332181	0.706783	0.0130216	0.523474	1.00824	-0.910649	0	1	835	835
contig_109852_1_1273_+	1374	2.9653	1.9589	2.0464	0.88064	0.84928	1.6204	0	0	0	0	0	0	0	0	0	0	0	0	2.32353	1.11677	0	0	0	0	0.557506	0.436435	0	0	0	0	-3.3018	0	1	1424	1273	tps:THAPSDRAFT_11118	hypothetical protein						B8LD43	KOG0028	Ca2+-binding protein (centrin/caltractin), EF-Hand superfamily protein	Cytoskeleton	CELLULAR PROCESSES AND SIGLING	_GAP_||PF13499||_GAP_
contig_159065_306_916_-	1374	2.9653	0.97947	2.0464	1.7613	2.5478	1.6204	0	0	0	2.384	1.5801	1.5636	0.96928	1.9079	0	0	0	1.7178	1.99706	1.9765	0	1.84257	0.95906	0.5726	0.993834	0.499751	0	0.468968	0.953991	0.991772	0.700723	1	0	916	611	tps:THAPSDRAFT_3113	hypothetical protein						B8BWU9
contig_159256_240_991_-	1374	0	0	0	0	0	0	0	0	0	0	0	0	0.96928	0	1.8851	0	0	0	0	0	0	0	0.95146	0	0	0	0	0	0.942676	0	0.606301	0.999999	0	991	752	pti:PHATRDRAFT_43689	hypothetical protein						B7FT47
contig_16213_286_856_-	1374	2.9653	1.9589	2.0464	0	0	0	0	0	1.0237	0	0.79006	0	0.96928	2.8619	3.7702	0	0	0	2.32353	0	0.341233	0.263353	2.53379	0	0.557506	0	0.591033	0.456141	1.429	0	0.742531	1	0	856	571	ppp:PHYPADRAFT_87691	hypothetical protein						A9T3R9	KOG0028	Ca2+-binding protein (centrin/caltractin), EF-Hand superfamily protein	Cytoskeleton	CELLULAR PROCESSES AND SIGLING	_GAP_||PF00036||PF13499||PF00036||PF13499||PF00036
contig_180796_73_609_+	1374	0	0	0	0	0	0	0	0	0	1.5893	0.79006	0	0	0	0	0	0	0	0	0	0	0.79312	0	0	0	0	0	0.794654	0	0	0.863499	1	0	877	537	ddi:DDB_G0269038	atp5D; ATP synthase F1 delta; K02134 F-type H+-transporting ATPase subunit delta [EC:3.6.3.14]	ddi01100||ddi00190	K02134	F-type H+-transporting ATPase subunit delta	Oxidative phosphorylation || Alzheimer's disease || Parkinson's disease || Huntington's disease	3.6.3.14	Q55F42	KOG1758	Mitochondrial F1F0-ATP synthase, subunit delta/ATP16	Energy production and conversion	METABOLISM	_GAP_||PF02823||_GAP_
contig_198945_40_540_+	1374	2.9653	1.9589	3.0696	0	0.84928	0	0	1.1027	1.0237	0.79465	1.5801	1.5636	2.9078	2.8619	2.8277	3.4881	1.7735	3.4355	2.6646	0.283093	0.7088	1.31278	2.8658	2.89903	0.613375	0.490332	0.615108	0.448792	0.0401922	0.975095	0.891172	1	0	2307	501	pkn:PKH_130290	eukaryotictranslation initiation factor 5a; K03263 translation initiation factor 5A		K03263	translation initiation factor 5A			B3LB29	KOG3271	Translation initiation factor 5A (eIF-5A)	Translation, ribosomal structure and biogenesis	INFORMATION STORAGE AND PROCESSING	PF08207||PF01287
contig_81844_1963_3665_-	1374	0	0	0	0	0	0	0	0	0	0	0	0	0.96928	0.95395	1.8851	1.744	1.7735	1.7178	0	0	0	0	1.26944	1.7451	0	0	0	0	0.533229	0.0278663	-0.773663	0	1	3802	1703	tad:TRIADDRAFT_52359	hypothetical protein ; K11644 paired amphipathic helix protein Sin3a		K11644	paired amphipathic helix protein Sin3a	Thyroid hormone sigling pathway || Huntington's disease || Transcriptiol misregulation in cancer		B3RI28	KOG4204	Histone deacetylase complex, SIN3 component	Chromatin structure and dymics	INFORMATION STORAGE AND PROCESSING	_GAP_||PF02671||_GAP_||PF08295
contig_106521_1_534_+	1871	3.0876	0	0	4.4689	3.5552	5.2251	0	0	0	0	0	0	0	0.82279	0	1.4526	1.6063	1.3089	1.0292	4.4164	0	0	0.274263	1.45593	1.78263	0.836187	0	0	0.475038	0.148728	1.7762	1	0	657	534	tro:trd_A0663	endoribonuclease L-PSP						B9L4E9					PF14588
contig_15813_1_680_-	1871	0	0	0	0	0	0	0	0	0	0	0	0	7.38	6.5823	6.5022	7.2629	10.441	9.8166	0	0	0	0	6.8215	9.1735	0	0	0	0	0.48533	1.68382	2.86359	1	0	829	680	ckn:Calkro_1338	von willebrand factor type A						E4SBS4					PF00092||_GAP_
contig_21874_1_480_+	1871	0	0	0	0	0	0	0	0	0	4.6903	1.3146	1.0641	3.69	4.1139	5.0573	5.8103	2.4094	4.5811	0	0	0	2.35633	4.28707	4.26693	0	0	0	2.02515	0.699905	1.72208	3.04037	1	0	670	480
contig_30604_1_905_-	1871	0	0	0	0	0	0	1.4336	0	1.4386	6.5664	6.5731	12.769	5.904	8.2279	8.6696	5.8103	10.441	7.8533	0	0	0.9574	8.63617	7.6005	8.03487	0	0	0.829136	3.57914	1.48572	2.32068	2.75573	1	0	905	905	pti:PHATRDRAFT_54465	ISIP2A; iron starvation induced protein						B7FYL2
contig_39899_237_1478_-	1871	0	0	0	9.8315	7.1103	6.5314	0	1.5154	0	0	0	0	0	0	0	0	0	0	0	7.8244	0.505133	0	0	0	0	1.76213	0.874917	0	0	0	1.24833	1	0	1479	1242	olu:OSTLU_37879	ATS1; ATP sulfurylase (sulfate adenylyltransferase); K00958 sulfate adenylyltransferase [EC:2.7.7.4]	olu00920||olu00450||olu00230||olu01100	K00958	sulfate adenylyltransferase [EC:2.7.7.4]	Purine metabolism || Selenocompound metabolism || Sulfur metabolism	2.7.7.4	A4S3B3					_GAP_||PF14306||PF01747
contig_67316_60_1043_+	1871	1.5438	1.8571	1.9448	0	0	0	5.7345	7.5769	4.3159	5.6283	3.9439	4.2564	9.594	9.0507	7.9471	7.2629	11.244	7.1988	1.7819	0	5.87577	4.60953	8.86393	8.56857	0.210812	0	1.63508	0.896007	0.839185	2.31721	-0.896842	0	1	2882	984	olu:OSTLU_25997	CPN60C; chaperonin 60, mitochondrial; K04077 chaperonin GroEL	olu03018	K04077	chaperonin GroEL	R degradation || Type I diabetes mellitus || Legionellosis || Tuberculosis		A4S3B4	KOG0356	Mitochondrial chaperonin, Cpn60/Hsp60p	Posttranslatiol modification, protein turnover, chaperones	CELLULAR PROCESSES AND SIGLING	_GAP_||PF00118
contig_82853_1_595_+	1871	0	0	0	0	0	0	0	0	0	3.7522	3.9439	3.1923	0.738	0.82279	0.72247	2.1789	2.4094	1.3089	0	0	0	3.62947	0.761087	1.96573	0	0	0	0.390542	0.0539979	0.580392	2.17255	1	0	595	595
contig_104223_346_1892_-	1871	0	0	0	0	0	0	0	0	0	1.8761	2.6292	3.1923	1.476	0.82279	0.72247	0.72629	3.2125	0.65444	0	0	0	2.56587	1.00709	1.53108	0	0	0	0.660382	0.409177	1.4566
contig_104785_31_1008_+	1871	0	0	0	0	0	0	0	0	0	1.8761	0	0	0	0	0	0	0	0	0	0	0	0.625367	0	0	0	0	0	1.08317	0	0	-1.9294	0	1	1792	978	pti:PHATRDRAFT_49857	hypothetical protein						B7GC34					PF08547||_GAP_
contig_108657_45_1034_+	1871	0	0	0	1.7875	1.1851	1.3063	0	0	0	0	0	0	0	0	0	0	0	0	0	1.4263	0	0	0	0	0	0.318624	0	0	0	0	3.23331	1	0	1159	990	tel:tll1511	chlI; magnesium-chelatase subunit; K03405 magnesium chelatase subunit I [EC:6.6.1.1]	tel01100||tel00860||tel01110	K03405	magnesium chelatase subunit I [EC:6.6.1.1]	Porphyrin and chlorophyll metabolism	6.6.1.1	Q8DIS0					_GAP_||PF01078||_GAP_
contig_40079_1237_2429_+	1871	0	0	0	2.6813	0	1.3063	0	0	0	0	0	0	0	0	0	0	0	0	0	1.3292	0	0	0	0	0	1.3408	0	0	0	0	-0.488752	0	0.809016	2675	1193	pla:Plav_3501	aspartate-semialdehyde dehydrogese; K00133 aspartate-semialdehyde dehydrogese [EC:1.2.1.11]	pla01110||pla01100||pla01120||pla00260||pla00270||pla00300	K00133	aspartate-semialdehyde dehydrogese [EC:1.2.1.11]	Glycine, serine and threonine metabolism || Cysteine and methionine metabolism || Lysine biosynthesis || 2-Oxocarboxylic acid metabolism || Biosynthesis of amino acids	1.2.1.11	A7HYW7	KOG4777	Aspartate-semialdehyde dehydrogese	Amino acid transport and metabolism	METABOLISM	_GAP_||PF01118||PF02774
contig_45289_283_531_-	1871	3.0876	0	0	3.5751	2.3701	1.3063	0	0	1.4386	0.93805	0	1.0641	3.69	1.6456	1.4449	0.72629	0.80313	1.3089	1.0292	2.41717	0.479533	0.667383	2.26017	0.946107	1.78263	1.13513	0.830576	0.581397	1.24233	0.316529	0.814753	1	0	1011	249									KOG3502	40S ribosomal protein S28	Translation, ribosomal structure and biogenesis	INFORMATION STORAGE AND PROCESSING	PF01200
contig_101667_117_701_-	1374	7.9075	9.7947	9.2088	12.329	11.041	8.9121	6.7008	5.5134	7.166	7.9465	7.9006	7.8178	11.631	8.5856	11.311	8.7202	5.3204	8.5888	8.97033	10.7607	6.46007	7.8883	10.5092	7.54313	0.965935	1.72561	0.852195	0.0652257	1.67355	1.92606	0.225667	0.000615859	0	753	585	tps:THAPSDRAFT_1254	hypothetical protein						B8BQE2
contig_109012_45_1228_+	1374	31.63	29.384	32.742	37.867	37.368	45.371	35.738	41.902	33.782	23.84	26.072	24.235	23.263	21.941	22.621	26.161	21.281	25.766	31.252	40.202	37.1407	24.7157	22.6083	24.4027	1.71062	4.48343	4.23783	1.19111	0.661091	2.71065	-1.76675	0	1	2231	1184									KOG1557	Fructose-biphosphate aldolase	Carbohydrate transport and metabolism	METABOLISM	_GAP_||PF00274
contig_110253_230_808_-	1374	4.9422	3.9179	6.1392	4.4032	4.2464	5.6713	0	0	0	8.7412	7.1106	7.8178	0	0.95395	0.94256	0	0	0	4.99977	4.77363	0	7.88987	0.63217	0	1.11177	0.781345	0	0.817685	0.547505	0	0.142691	3.97e-06	0	871	579	pti:PHATRDRAFT_43509	hypothetical protein						B7FSG7
contig_116214_159_785_+	1374	5.9306	3.9179	5.116	11.448	9.342	8.9121	14.518	11.027	12.285	13.509	11.851	13.29	12.601	12.401	12.253	6.9762	8.8673	6.871	4.98817	9.9007	12.61	12.8833	12.4183	7.5715	1.01242	1.35713	1.76805	0.900708	0.174646	1.12343	0.636081	1	0	1082	627	ppp:PHYPADRAFT_110504	hypothetical protein	ppp03010	K02995	small subunit ribosomal protein S8e	Ribosome		A9TQV8	KOG3283	40S ribosomal protein S8	Translation, ribosomal structure and biogenesis	INFORMATION STORAGE AND PROCESSING	PF01201
contig_117413_1_2050_+	1374	0.98843	2.9384	2.0464	0.88064	1.6986	0	1.1168	1.1027	1.0237	3.1786	1.5801	2.3453	3.8771	2.8619	2.8277	3.4881	1.7735	3.4355	1.99108	0.859747	1.08107	2.368	3.1889	2.89903	0.976161	0.849493	0.0501787	0.799492	0.596244	0.975095	-0.533485	0	0.999991	2664	2050													_GAP_||PF02225||_GAP_
contig_133342_321_950_-	1374	6.919	4.8973	5.116	8.8064	7.6435	8.9121	3.3504	3.3081	3.0711	8.7412	7.9006	9.3814	5.8157	6.6777	6.5979	5.2321	3.5469	3.4355	5.6441	8.454	3.2432	8.6744	6.36377	4.0715	1.1095	0.7039	0.150536	0.742657	0.476314	1.00665	-0.208374	0	0	2468	630	pti:PHATRDRAFT_48359	hypothetical protein; K02717 photosystem II oxygen-evolving enhancer protein 2	pti01100||pti00195	K02717	photosystem II oxygen-evolving enhancer protein 2	Photosynthesis		B7G6V4					_GAP_||PF01789
contig_135991_91_888_+	1374	5.9306	6.8563	7.1624	6.1644	8.4928	8.1019	2.2336	3.3081	2.0474	0	0	0	0	0	0	1.744	0	0	6.64977	7.58637	2.5297	0	0	0.581333	0.641346	1.24687	0.680513	0	0	1.0069	-2.88524	0	1	888	798
contig_136462_270_1441_-	1374	11.861	10.774	13.302	7.9257	11.89	12.153	13.402	12.13	14.332	14.304	12.641	12.508	16.478	14.309	16.023	22.673	19.508	18.895	11.979	10.6562	13.288	13.151	15.6033	20.3587	1.26812	2.36836	1.10542	1.00074	1.14378	2.02757	-0.590683	0	1	1442	1172													PF13905||_GAP_
contig_152863_61_539_-	1374	9.8843	9.7947	9.2088	7.0451	7.6435	6.4815	5.584	4.4108	5.1185	8.7412	8.6907	9.3814	9.6928	11.447	10.368	8.7202	10.641	13.742	9.62927	7.0567	5.03777	8.93777	10.5026	11.0344	0.36688	0.581087	0.590752	0.385027	0.884812	2.53391	1.8318	0.999972	3.8e-11	539	479	tps:THAPSDRAFT_bd1039	PsbV; cytochrome c550, PsbV; K02720 photosystem II cytochrome c550	tps01100||tps00195	K02720	photosystem II cytochrome c550	Photosynthesis		B8LES1					PF14495
contig_158852_180_1443_-	1374	1.9769	2.9384	3.0696	4.4032	5.9449	3.2408	2.2336	2.2054	2.0474	1.5893	3.1602	3.1271	0.96928	0.95395	0.94256	0	1.7735	0	2.66163	4.52963	2.16213	2.62553	0.955263	0.591167	0.596614	1.35648	0.100357	0.897557	0.0134083	1.02393	-0.635978	0	1	1444	1264	tps:THAPSDRAFT_26051	GL; hypothetical protein; K01915 glutamine synthetase [EC:6.3.1.2]	tps01100||tps00910||tps00250||tps00330	K01915	glutamine synthetase [EC:6.3.1.2]	Alanine, aspartate and glutamate metabolism || Arginine and proline metabolism || Glyoxylate and dicarboxylate metabolism || Nitrogen metabolism || Biosynthesis of amino acids || Two-component system || Glutamatergic sypse || GABAergic sypse	6.3.1.2	B8CFZ9	KOG0683	Glutamine synthetase	Amino acid transport and metabolism	METABOLISM	_GAP_||PF03951||PF00120
contig_162059_25_840_+	1374	2.9653	3.9179	3.0696	4.4032	5.0957	4.8611	2.2336	3.3081	2.0474	3.1786	4.7404	6.2542	1.9386	1.9079	0.94256	3.4881	3.5469	3.4355	3.3176	4.78667	2.5297	4.7244	1.59635	3.49017	0.522484	0.352199	0.680513	1.53786	0.56641	0.0557287	-0.119249	0	0	1409	816	pti:PHATRDRAFT_48938	hypothetical protein						B7G8Y0
contig_162397_233_817_-	1374	16.803	21.548	18.418	24.658	23.78	21.065	25.686	26.465	25.593	19.866	17.381	19.545	22.293	21.941	24.506	22.673	26.602	29.202	18.923	23.1677	25.9147	18.9307	22.9133	26.159	2.41247	1.87313	0.478866	1.35161	1.39047	3.28697	0.801951	1	0	847	585	tps:THAPSDRAFT_6290	NDK2; nucleoside diphosphate kise (EC:2.7.4.6); K00940 nucleoside-diphosphate kise [EC:2.7.4.6]	tps01100||tps00230||tps01110||tps00240	K00940	nucleoside-diphosphate kise [EC:2.7.4.6]	Purine metabolism || Pyrimidine metabolism	2.7.4.6	B8C642	KOG0888	Nucleoside diphosphate kise	Nucleotide transport and metabolism	METABOLISM	_GAP_||PF00334
contig_162639_154_624_+	1374	6.919	6.8563	6.1392	6.1644	5.9449	5.6713	3.3504	3.3081	2.0474	3.9733	3.9503	4.6907	2.9078	3.8158	3.7702	3.4881	1.7735	3.4355	6.63817	5.92687	2.90197	4.20477	3.49793	2.89903	0.433254	0.247044	0.740379	0.420988	0.511579	0.975095	0.509238	0.999878	0	1352	471	tps:THAPSDRAFT_18469	hypothetical protein						B8BZY5					PF01346||PF00254
contig_16264_1_630_+	1374	10.873	11.754	11.255	7.0451	7.6435	8.9121	8.9344	7.7188	8.1897	2.384	1.5801	1.5636	9.6928	8.5856	10.368	0	0	0	11.294	7.8669	8.28097	1.84257	9.5488	0	0.441793	0.953338	0.612918	0.468968	0.899883	0	0.691851	1	0	684	630	ppp:PHYPADRAFT_135679	hypothetical protein; K03626 scent polypeptide-associated complex subunit alpha		K03626	scent polypeptide-associated complex subunit alpha			A9SV00	KOG2239	Transcription factor containing C and TS-N domains	Transcription	INFORMATION STORAGE AND PROCESSING	_GAP_||PF01849||_GAP_||PF00627
contig_162987_17_853_+	1374	12.85	11.754	12.278	9.687	8.4928	10.532	4.4672	2.2054	6.1423	8.7412	7.9006	8.5996	10.662	9.5395	10.368	12.208	8.8673	8.5888	12.294	9.5706	4.27163	8.4138	10.1898	9.88803	0.548175	1.02457	1.97572	0.450048	0.582073	2.01397	0.217743	0.0114145	0	1076	837
contig_17088_1_1208_+	1374	14.827	15.671	14.325	22.016	24.629	24.306	26.803	25.362	18.427	21.456	17.381	16.417	10.662	15.263	12.253	10.464	14.188	15.46	14.941	23.6503	23.5307	18.418	12.726	13.3707	0.680203	1.42456	4.47825	2.67477	2.33669	2.59635	-0.4868	0	0.998427	1209	1208									KOG0657	Glyceraldehyde 3-phosphate dehydrogese	Carbohydrate transport and metabolism	METABOLISM	_GAP_||PF00044||PF02800||_GAP_
contig_17155_47_688_+	1374	2.9653	2.9384	2.0464	1.7613	1.6986	0	4.4672	3.3081	4.0948	4.7679	1.5801	3.1271	5.8157	6.6777	7.5404	3.4881	3.5469	8.5888	2.65003	1.1533	3.9567	3.15837	6.67793	5.20793	0.522935	0.999279	0.591762	1.59413	0.86235	2.92806	0.770043	1	0	727	642	pti:PHATRDRAFT_43556	hypothetical protein						B7FSM5					_GAP_||PF04536
contig_1766_1_288_-	1374	2.9653	2.9384	2.0464	2.6419	2.5478	1.6204	4.4672	4.4108	3.0711	2.384	3.9503	3.9089	3.8771	3.8158	2.8277	5.2321	5.3204	3.4355	2.65003	2.27003	3.98303	3.4144	3.50687	4.66267	0.522935	0.564563	0.790261	0.892593	0.588974	1.06367	0.0993383	0.00717985	3.92e-05	340	288									KOG0011	Nucleotide excision repair factor NEF2, RAD23 component	Replication, recombition and repair	INFORMATION STORAGE AND PROCESSING	PF00240
contig_181962_46_420_+	1374	0	0.97947	1.0232	0.88064	0.84928	0.81019	0	1.1027	0	1.5893	2.3702	1.5636	4.8464	4.7698	5.6553	5.2321	7.0938	8.5888	0.667557	0.846703	0.367567	1.84103	5.0905	6.97157	0.578534	0.0352956	0.636644	0.458452	0.490628	1.68169
contig_190951_1_553_+	1374	11.861	11.754	12.278	16.732	12.739	13.773	18.986	18.746	17.403	5.5626	6.3205	7.036	4.8464	4.7698	6.5979	3.4881	3.5469	5.1533	11.9643	14.4147	18.3783	6.30637	5.4047	4.06277	0.276862	2.07239	0.853145	0.736802	1.03405	0.944887	-3.6719	0	1	741	553	pmb:A9601_02871	hypothetical protein						A2BP64					PF07681||_GAP_
contig_199272_278_2861_-	1374	3.9537	4.8973	2.0464	3.5225	1.6986	2.4306	3.3504	2.2054	3.0711	0	0	0.78178	1.9386	3.8158	1.8851	0	0	0	3.63247	2.55057	2.87563	0.260593	2.5465	0	1.45234	0.917849	0.597002	0.451361	1.09957	0	-0.491567	0	0.999959	4419	2584	tps:THAPSDRAFT_5706	hypothetical protein						B8C3N6					_GAP_||PF02298||_GAP_
contig_199386_198_963_-	1374	0	0	0	1.7613	4.2464	4.051	0	1.1027	0	1.5893	2.3702	0.78178	5.8157	6.6777	6.5979	5.2321	3.5469	5.1533	0	3.3529	0.367567	1.58043	6.36377	4.6441	0	1.38182	0.636644	0.794247	0.476314	0.95102	0.701133	1	0	963	766									KOG1061	Vesicle coat complex AP-1/AP-2/AP-4, beta subunit	Intracellular trafficking, secretion, and vesicular transport	CELLULAR PROCESSES AND SIGLING	_GAP_||PF09066
contig_31723_2959_3930_-	1374	14.827	13.713	12.278	16.732	13.588	17.014	21.219	20.951	20.474	18.277	18.961	18.763	18.416	18.125	16.966	12.208	14.188	13.742	13.606	15.778	20.8813	18.667	17.8357	13.3793	1.27786	1.90183	0.377354	0.35196	0.767079	1.03863	-0.0520902	0	0	4527	972	ppp:PHYPADRAFT_226792	hypothetical protein; K04077 chaperonin GroEL	ppp03018	K04077	chaperonin GroEL	R degradation || Type I diabetes mellitus || Legionellosis || Tuberculosis		A9TYY1	KOG0356	Mitochondrial chaperonin, Cpn60/Hsp60p	Posttranslatiol modification, protein turnover, chaperones	CELLULAR PROCESSES AND SIGLING	PF00118
contig_3298_33_985_-	1374	0	0	0	0	0.84928	0	1.1168	0	0	11.92	11.851	11.727	2.9078	4.7698	4.7128	8.7202	7.0938	6.871	0	0.283093	0.372267	11.8327	4.13013	7.56167	0	0.490332	0.644785	0.0977974	1.05896	1.00948	1.48842	1	0	985	953	tel:tlr0960	petA; apocytochrome f; K02634 apocytochrome f	tel01100||tel00195	K02634	apocytochrome f	Photosynthesis		P0C8N5					_GAP_||PF01333
contig_37210_1_1091_+	1374	5.9306	5.8768	6.1392	7.9257	10.191	9.7223	11.168	9.9242	10.237	4.7679	6.3205	5.4725	1.9386	2.8619	2.8277	3.4881	1.7735	1.7178	5.9822	9.27967	10.4431	5.5203	2.54273	2.32647	0.138601	1.19576	0.646999	0.777403	0.523474	1.00639	-3.36159	0	1	1092	1091	tps:THAPSDRAFT_270092	hypothetical protein						B8CFP9					_GAP_||PF00504||_GAP_
contig_40020_260_679_+	1374	1.9769	2.9384	3.0696	3.5225	3.3971	2.4306	1.1168	0	1.0237	2.384	1.5801	2.3453	1.9386	0.95395	0.94256	1.744	1.7735	3.4355	2.66163	3.11673	0.7135	2.10313	1.27837	2.31767	0.596614	0.597508	0.61966	0.453373	0.571804	0.968184	0.0490103	0	0	1284	420	tps:THAPSDRAFT_21965	hypothetical protein; K09584 protein disulfide-isomerase A6 [EC:5.3.4.1]	tps04141	K09584	protein disulfide-isomerase A6 [EC:5.3.4.1]	Protein processing in endoplasmic reticulum	5.3.4.1	B8BW56	KOG0191	Thioredoxin/protein disulfide isomerase	Posttranslatiol modification, protein turnover, chaperones	CELLULAR PROCESSES AND SIGLING	PF00085||_GAP_
contig_83694_1_824_+	1374	0	0	1.0232	0	0	0	2.2336	2.2054	4.0948	0	0.79006	0.78178	3.8771	3.8158	5.6553	1.744	0	1.7178	0.341067	0	2.8446	0.523947	4.4494	1.15393	0.590745	0	1.0828	0.45377	1.04479	0.999421	-0.290831	0	0.00102025	824	824									KOG0104	Molecular chaperones GRP170/SIL1, HSP70 superfamily	Posttranslatiol modification, protein turnover, chaperones	CELLULAR PROCESSES AND SIGLING	PF00012
contig_96161_1_424_+	1374	2.9653	2.9384	4.0928	6.1644	5.0957	4.8611	7.8176	6.6161	7.166	7.1519	4.7404	6.2542	1.9386	1.9079	4.7128	1.744	1.7735	3.4355	3.33217	5.37373	7.1999	6.04883	2.8531	2.31767	0.658865	0.694712	0.601467	1.2188	1.61062	0.968184	0.699971	0.992305	0	424	424
contig_156003_556_894_+	1374	0	0	0	0	0	0	0	0	1.0237	2.384	1.5801	2.3453	1.9386	1.9079	0	0	0	0	0	0	0.341233	2.10313	1.28217	0	0	0	0.591033	0.453373	1.11049	0	0.913122	1	0	1355	339									KOG0187	40S ribosomal protein S17	Translation, ribosomal structure and biogenesis	INFORMATION STORAGE AND PROCESSING	PF00833
contig_159317_190_861_-	1374	0.98843	0.97947	0	0.88064	0	1.6204	0	0	0	0	0	0	0	0	0	0	0	0	0.655967	0.83368	0	0	0	0	0.568101	0.81122	0	0	0	0	-0.58667	0	0.999482	4958	672	pti:PHATRDRAFT_49857	hypothetical protein						B7GC34					_GAP_||PF08547
contig_163861_53_787_+	1374	0	0	0	0	0	0	0	0	0	2.384	1.5801	1.5636	0	2.8619	2.8277	0	0	0	0	0	0	1.84257	1.89653	0	0	0	0	0.468968	1.64254	0	0.810184	1	0	877	735	tdn:Suden_1392	5'-methylthioadenosine/S-adenosylhomocysteine nucleosidase (EC:3.2.2.9); K01243 S-adenosylhomocysteine/5'-methylthioadenosine nucleosidase [EC:3.2.2.9]	tdn01100||tdn00270	K01243	adenosylhomocysteine nucleosidase [EC:3.2.2.9]	Cysteine and methionine metabolism || Biosynthesis of amino acids	3.2.2.9	Q30QR2					PF01048
contig_23973_1_496_+	1374	0	0	0	0	0.84928	0	0	0	0	0.79465	1.5801	1.5636	0	0	0.94256	0	0	0	0	0.283093	0	1.31278	0.314187	0	0	0.490332	0	0.448792	0.544187	0
contig_107079_1972_2694_-	1871	0	0	0	1.7875	3.5552	3.9188	0	0	0	0.93805	0	1.0641	0	0	0	0	0.80313	0	0	3.08717	0	0.667383	0	0.26771	0	1.14013	0	0.581397	0	0.463687	-0.412663	0	0.622504	2774	723									KOG0841	Multifunctiol chaperone (14-3-3 family)	Posttranslatiol modification, protein turnover, chaperones	CELLULAR PROCESSES AND SIGLING	PF00244
contig_108525_1_984_+	1871	0.77189	0	0	0.89377	0	1.3063	0	0	0	4.6903	5.2585	2.1282	16.236	14.81	14.449	9.4417	8.0313	8.5077	0.257297	0.733357	0	4.02567	15.165	8.66023	0.445651	0.667761	0	1.66763	0.944913	0.717466	0.346236	0.0827485	0	984	984									KOG2670	Enolase	Carbohydrate transport and metabolism	METABOLISM	PF03952||PF00113
contig_110364_1_398_-	1871	36.279	31.57	38.895	14.3	15.406	20.901	20.071	13.638	12.948	3.7522	2.6292	1.0641	1.476	3.2912	0.72247	2.9052	0	3.2722	35.5813	16.869	15.5523	2.48183	1.82989	2.05913	3.712	3.53533	3.92846	1.3501	1.32042	1.79268	-3.52203	0	1	398	398
contig_120223_1_652_+	1871	0.77189	0	0	5.3626	4.7402	3.9188	0	0	0	0	0	0	0	0	0	0	0	0	0.257297	4.67387	0	0	0	0	0.445651	0.724182	0	0	0	0	-1.9338	0	1	652	652									KOG0101	Molecular chaperones HSP70/HSC70, HSP70 superfamily	Posttranslatiol modification, protein turnover, chaperones	CELLULAR PROCESSES AND SIGLING	PF00012
contig_25911_1_794_+	1871	0	0	0	0	0	0	2.8672	4.5462	4.3159	5.6283	9.2024	7.4487	7.38	5.7595	4.3348	7.2629	8.0313	7.1988	0	0	3.90977	7.42647	5.82477	7.49767	0	0	0.910202	1.78715	1.52365	0.46325	2.13654	1	0	794	794	pti:PHATRDRAFT_54465	ISIP2A; iron starvation induced protein						B7FYL2
contig_30494_1_900_+	1871	0	0	0	1.7875	0	2.6126	0	0	0	4.6903	2.6292	2.1282	10.332	9.8735	10.837	5.084	4.8188	5.2355	0	1.4667	0	3.14923	10.3475	5.0461	0	1.33552	0	1.35791	0.481937	0.210919	1.9199	1	0	1085	900									KOG2670	Enolase	Carbohydrate transport and metabolism	METABOLISM	PF00113
contig_32414_1_1055_-	1871	0	0	0	0	0	0	7.1681	4.5462	4.3159	8.4425	9.2024	10.641	5.904	8.2279	7.9471	7.9892	12.85	8.5077	0	0	5.3434	9.42863	7.35967	9.7823	0	0	1.58443	1.11657	1.26844	2.66933	3.44605	1	0	1056	1055	vcn:VOLCADRAFT_100006	hypothetical protein
contig_3331_1068_2356_+	1871	0.77189	0	0	2.6813	2.3701	2.6126	2.8672	4.5462	2.8772	4.6903	2.6292	5.3205	1.476	0	1.4449	0.72629	0	0.65444	0.257297	2.55467	3.4302	4.21333	0.973633	0.460243	0.445651	0.163489	0.966497	1.40762	0.843335	0.400198	2.70447	1	0	2662	1289	pti:PHATRDRAFT_15815	hypothetical protein; K01507 inorganic pyrophosphatase [EC:3.6.1.1]	pti00190	K01507	inorganic pyrophosphatase [EC:3.6.1.1]	Oxidative phosphorylation	3.6.1.1	B7G9Z6					PF03030||_GAP_
contig_3858_1_1530_+	1871	0	0	0	0.89377	0	0	0	0	0	1.8761	0	3.1923	7.38	6.5823	8.6696	3.6314	1.6063	5.2355	0	0.297923	0	1.68947	7.54397	3.49107	0	0.516018	0	1.60431	1.05327	1.81867	-0.174711	0	0	1662	1530	olu:OSTLU_28765	hypothetical protein; K01689 enolase [EC:4.2.1.11]	olu00010||olu01110||olu03018||olu01100	K01689	enolase [EC:4.2.1.11]	Glycolysis / Gluconeogenesis || Methane metabolism || Carbon metabolism || Biosynthesis of amino acids || R degradation || HIF-1 sigling pathway	4.2.1.11	A4RQS6	KOG2670	Enolase	Carbohydrate transport and metabolism	METABOLISM	_GAP_||PF03952||PF00113
contig_40539_1_449_+	1871	7.7189	7.4283	7.7791	12.513	16.591	16.982	1.4336	1.5154	2.8772	8.4425	2.6292	4.2564	8.118	8.2279	2.8899	4.3577	7.2282	5.8899	7.6421	15.362	1.94207	5.10937	6.41193	5.82527	0.187587	2.47504	0.810881	2.99905	3.05067	1.43634	-0.290529	0	0.020348	2571	449	olu:OSTLU_14029 || olu:OSTLU_44220	hypothetical protein; K11254 histone H4 || HFO3502; hypothetical protein; K11254 histone H4		K11254	histone H4	Alcoholism || Viral carcinogenesis || Systemic lupus erythematosus		A4RS62	KOG3467	Histone H4	Chromatin structure and dymics	INFORMATION STORAGE AND PROCESSING	_GAP_||PF00125
contig_6680_1_952_+	1871	0	0	0	0	0	0	1.4336	1.5154	1.4386	4.6903	2.6292	5.3205	5.904	5.7595	7.2247	6.5366	4.8188	7.1988	0	0	1.46253	4.21333	6.29607	6.18473	0	0	0.0458521	1.40762	0.807459	1.2284	0.761443	0.999837	0	952	952
contig_69192_41_847_+	1871	1.5438	0	0	0	0	0	1.4336	3.0308	4.3159	5.6283	1.3146	2.1282	1.476	0.82279	0.72247	2.1789	0.80313	3.2722	0.5146	0	2.92677	3.0237	1.00709	2.08474	0.891313	0	1.44396	2.29204	0.409177	1.23723	1.10887	1	0	1020	807									KOG3166	60S ribosomal protein L7A	Translation, ribosomal structure and biogenesis	INFORMATION STORAGE AND PROCESSING	_GAP_||PF01248||_GAP_
contig_85752_51_1171_+	1871	0	0	0	2.6813	1.1851	2.6126	1.4336	1.5154	1.4386	1.8761	3.9439	3.1923	2.214	2.4684	2.1674	2.1789	1.6063	1.3089	0	2.15967	1.46253	3.0041	2.28327	1.69803	0	0.844698	0.0458521	1.04667	0.162014	0.442195	1.21475	1	0	1303	1121	cre:CHLREDRAFT_195910	PRK1; phosphoribulokise (EC:2.7.1.19); K00855 phosphoribulokise [EC:2.7.1.19]	cre01100||cre00710	K00855	phosphoribulokise [EC:2.7.1.19]	Carbon fixation in photosynthetic organisms || Carbon metabolism	2.7.1.19	A8IYP4||P19824	KOG4203	Armadillo/beta-Catenin/plakoglobin	Sigl transduction mechanisms	CELLULAR PROCESSES AND SIGLING	_GAP_||PF00485||_GAP_
contig_103085_330_1004_-	1871	0	0	0	0	0	0	0	0	0	1.8761	1.3146	2.1282	0.738	0	0	0.72629	0	0	0	0	0	1.77297	0.246	0.242097	0	0	0	0.41649	0.426084	0.419324	1.82301	1	0	1492	675
contig_104980_1_1066_+	1871	0	0	0	0	0	0	0	0	0	1.8761	0	0	0.738	0.82279	0.72247	1.4526	0	0.65444	0	0	0	0.625367	0.761087	0.702347	0	0	0	1.08317	0.0539979	0.727484	0.794633	1	0	2316	1066
contig_112827_110_990_-	1871	0	0	0	0	0	0	0	0	0	0	0	0	0	0	0	0.72629	0.80313	1.3089	0	0	0	0	0	0.946107	0	0	0	0	0	0.316529	1.76215	1	0	990	881
contig_118198_83_826_+	1871	0.77189	0	0	1.7875	2.3701	1.3063	1.4336	1.5154	1.4386	2.8142	2.6292	2.1282	0.738	0.82279	1.4449	1.4526	1.6063	1.9633	0.257297	1.8213	1.46253	2.52387	1.0019	1.67407	0.445651	0.532705	0.0458521	0.354923	0.385987	0.262007	1.30309	1	0	1179	744	olu:OSTLU_30488	RPL7; Ribosomal protein L7, component of cytosolic 80S ribosome and 60S large subunit; K02937 large subunit ribosomal protein L7e	olu03010	K02937	large subunit ribosomal protein L7e	Ribosome		A4RU41	KOG3184	60S ribosomal protein L7	Translation, ribosomal structure and biogenesis	INFORMATION STORAGE AND PROCESSING	PF08079||PF00327||_GAP_
contig_71472_879_1946_+	1871	1.5438	0	0	1.7875	3.5552	2.6126	0	0	1.4386	0.93805	2.6292	1.0641	0.738	0.82279	0.72247	0	0	0.65444	0.5146	2.65177	0.479533	1.54378	0.761087	0.218147	0.891313	0.884501	0.830576	0.942109	0.0539979	0.377841	0.984387	1	0	2519	1068	nve:NEMVE_v1g158071	hypothetical protein ; K02985 small subunit ribosomal protein S3e	nve03010	K02985	small subunit ribosomal protein S3e	Ribosome		A7RFX1	KOG3181	40S ribosomal protein S3	Translation, ribosomal structure and biogenesis	INFORMATION STORAGE AND PROCESSING	_GAP_||PF07650||PF00189||_GAP_
contig_108252_5020_5352_+	1374	0.98843	0.97947	1.0232	0	0.84928	0	1.1168	1.1027	1.0237	3.1786	3.1602	3.9089	3.8771	4.7698	4.7128	3.4881	1.7735	3.4355	0.997033	0.283093	1.08107	3.4159	4.45323	2.89903	0.0230996	0.490332	0.0501787	0.42705	0.499759	0.975095	-0.118445	0.00228136	0.0594078	5369	333	cyb:CYB_0922	rpsJ, nusE; 30S ribosomal protein S10; K02946 small subunit ribosomal protein S10	cyb03010	K02946	small subunit ribosomal protein S10	Ribosome		Q2JMX6					PF00338
contig_110919_1136_1729_+	1374	4.9422	6.8563	6.1392	7.0451	7.6435	8.9121	5.584	8.8215	7.166	7.1519	6.3205	6.2542	4.8464	5.7237	5.6553	12.208	12.414	10.307	5.97923	7.8669	7.1905	6.57553	5.40847	11.643	0.967025	0.953338	1.61889	0.500248	0.487964	1.16159	0.246986	0	0	1858	594	tps:THAPSDRAFT_bd1820	hypothetical protein						B8LEA0					_GAP_||PF02469
contig_115410_1_446_+	1374	3.9537	1.9589	2.0464	4.4032	3.3971	4.051	8.9344	8.8215	8.1897	6.3572	6.3205	6.2542	8.7235	8.5856	8.483	1.744	1.7735	1.7178	2.653	3.95043	8.64853	6.31063	8.59737	1.7451	1.12729	0.510534	0.401351	0.0522041	0.120681	0.0278663	1.21129	1	0	1046	446	hsa:6146	RPL22, EAP, HBP15, HBP15/L22; ribosomal protein L22; K02891 large subunit ribosomal protein L22e							KOG3434	60S ribosomal protein L22	Translation, ribosomal structure and biogenesis	INFORMATION STORAGE AND PROCESSING	_GAP_||PF01776
contig_12402_86_1206_+	1374	3.9537	2.9384	4.0928	3.5225	2.5478	2.4306	0	0	0	0	0	0	0.96928	0	0	0	0	0	3.66163	2.83363	0	0	0.323093	0	0.630188	0.599447	0	0	0.559614	0	0.288244	0.0193448	0	1470	1121
contig_155621_1_458_+	1374	0	0	0	0	0	0	0	0	2.0474	3.9733	3.1602	3.9089	7.7543	6.6777	7.5404	6.9762	10.641	8.5888	0	0	0.682467	3.6808	7.32413	8.73533	0	0	1.18207	0.452001	0.569952	1.83679	-0.96829	0.000129298	0.942785	682	458
contig_157797_6_404_-	1374	10.873	9.7947	11.255	7.0451	6.7942	6.4815	7.8176	7.7188	7.166	7.9465	7.9006	7.036	4.8464	4.7698	4.7128	6.9762	7.0938	6.871	10.6409	6.7736	7.56747	7.6277	4.77633	6.98033	0.757312	0.282364	0.351172	0.512941	0.0670392	0.111457	0.805885	0.961108	1.29e-07	2047	399	pmf:P9303_05011	atpC; F0F1 ATP synthase subunit epsilon (EC:3.6.3.14); K02114 F-type H+-transporting ATPase subunit epsilon [EC:3.6.3.14]	pmf00195||pmf01100||pmf00190	K02114	F-type H+-transporting ATPase subunit epsilon	Oxidative phosphorylation || Photosynthesis	3.6.3.14	A2C6Z3					PF02823||PF00401
contig_158427_95_1197_+	1374	1.9769	0.97947	4.0928	3.5225	1.6986	4.051	2.2336	2.2054	4.0948	1.5893	1.5801	3.1271	0	0.95395	0	0	0	1.7178	2.34972	3.0907	2.8446	2.09883	0.317983	0.5726	1.5898	1.23421	1.0828	0.890517	0.550763	0.991772	0.669712	1	0	1847	1103									KOG1557	Fructose-biphosphate aldolase	Carbohydrate transport and metabolism	METABOLISM	PF00274
contig_161722_91_411_+	1374	8.8959	8.8152	9.2088	10.568	11.041	11.343	14.518	13.232	11.261	9.5358	7.9006	8.5996	12.601	12.401	12.253	19.185	19.508	18.895	8.9733	10.984	13.0037	8.67867	12.4183	19.196	0.207902	0.390632	1.64046	0.820462	0.174646	0.306648	0.408668	0.579535	0	2877	321
contig_167802_1_453_+	1374	5.9306	5.8768	6.1392	7.9257	7.6435	8.1019	10.051	9.9242	11.261	11.92	11.851	10.945	15.509	15.263	14.138	0	5.3204	3.4355	5.9822	7.89037	10.4121	11.572	14.97	2.91863	0.138601	0.231234	0.737926	0.544093	0.730956	2.6976	1.22241	1	0	683	453	tps:THAPSDRAFT_39499	RL14; RL14, ribosomal protein 14 60S large ribosomal subunit; K02875 large subunit ribosomal protein L14e	tps03010	K02875	large subunit ribosomal protein L14e	Ribosome		B8BUA7	KOG3421	60S ribosomal protein L14	Translation, ribosomal structure and biogenesis	INFORMATION STORAGE AND PROCESSING	PF00467||PF01929
contig_181880_1_534_+	1374	19.769	21.548	22.51	19.374	17.835	21.065	21.219	22.054	22.522	15.098	15.011	16.417	3.8771	2.8619	4.7128	12.208	14.188	12.024	21.2757	19.4247	21.9317	15.5087	3.81727	12.8067	1.39065	1.6156	0.660058	0.787842	0.9269	1.1998	1.28524	0.997117	1.69e-08	811	534	npu:Npun_F4861	F0F1 ATP synthase subunit B; K02109 F-type H+-transporting ATPase subunit b [EC:3.6.3.14]	npu01100||npu00190||npu00195	K02109	F-type H+-transporting ATPase subunit b	Oxidative phosphorylation || Photosynthesis	3.6.3.14	B2J056					PF00430
contig_193121_284_786_-	1374	0	0	0	0	0.84928	0	0	0	0	2.384	2.3702	1.5636	7.7543	6.6777	5.6553	10.464	12.414	8.5888	0	0.283093	0	2.10593	6.69577	10.4889	0	0.490332	0	0.469725	1.04962	1.91272	0.429586	0.744228	0	786	503	tps:THAPSDRAFT_37166	RK17; RK17, ribosomal protein 17 50S large ribosomal subunit, chloroplast; K02879 large subunit ribosomal protein L17	tps03010	K02879	large subunit ribosomal protein L17	Ribosome		B8CAZ9	KOG3280	Mitochondrial/chloroplast ribosomal protein L17	Translation, ribosomal structure and biogenesis	INFORMATION STORAGE AND PROCESSING	_GAP_||PF01196
contig_200443_1198_2355_-	1374	21.746	22.528	20.464	4.4032	4.2464	5.6713	6.7008	7.7188	8.1897	10.33	10.271	9.3814	11.631	11.447	12.253	13.952	17.735	17.178	21.5793	4.77363	7.53643	9.99413	11.777	16.2883	1.04204	0.781345	0.761018	0.531462	0.42237	2.0424	-1.04891	0	1	2357	1158	tps:THAPSDRAFT_267987	CYS2; cysteine synthase (EC:2.5.1.47)						B8BQD5					_GAP_||PF00291||_GAP_
contig_32065_80_1500_+	1374	1.9769	3.9179	4.0928	1.7613	3.3971	2.4306	4.4672	5.5134	6.1423	6.3572	3.9503	4.6907	10.662	8.5856	8.483	8.7202	7.0938	8.5888	3.3292	2.52967	5.3743	4.9994	9.24353	8.13427	1.17439	0.822387	0.846169	1.23279	1.2295	0.903463	-0.120352	0	0	1679	1421									KOG1543	Cysteine proteise Cathepsin L	Posttranslatiol modification, protein turnover, chaperones	CELLULAR PROCESSES AND SIGLING	_GAP_||PF08246||_GAP_||PF00112||_GAP_
contig_32948_180_857_-	1374	11.861	10.774	10.232	14.09	13.588	15.394	12.285	9.9242	9.2134	12.714	13.431	12.508	8.7235	8.5856	11.311	10.464	14.188	13.742	10.9557	14.3573	10.4742	12.8843	9.54003	12.798	0.829556	0.932207	1.60797	0.484502	1.53525	2.03357	0.583412	1	0	857	678									KOG0084	GTPase Rab1/YPT1, small G protein superfamily, and related GTP-binding proteins	Sigl transduction mechanisms	CELLULAR PROCESSES AND SIGLING	_GAP_||PF00071
contig_81580_292_2611_-	1374	28.665	31.343	27.626	32.584	28.875	30.787	25.686	25.362	25.593	14.304	11.851	14.854	17.447	15.263	16.966	6.9762	5.3204	6.871	29.2113	30.7487	25.547	13.6697	16.5587	6.3892	1.91778	1.8548	0.166826	1.59884	1.14756	0.927101	-4.17503	0	1	2648	2320	pti:PHATRDRAFT_47674	ISIP3; iron starvation induced protein						B7G4H8					_GAP_||PF03713||_GAP_
contig_82023_938_1777_-	1374	0	0	0	0	0	0	0	0	0	0	0	0	2.9078	3.8158	4.7128	3.4881	5.3204	5.1533	0	0	0	0	3.81213	4.65393	0	0	0	0	0.902506	1.01309	-1.87391	0	1	2327	840	amu:Amuc_1537	outer membrane autotransporter barrel domain protein						B2ULH1
contig_85671_1_580_+	1374	3.9537	5.8768	4.0928	5.2838	5.0957	5.6713	6.7008	4.4108	4.0948	4.7679	3.9503	3.9089	6.785	7.6316	6.5979	10.464	8.8673	10.307	4.6411	5.35027	5.0688	4.20903	7.00483	9.87943	1.07241	0.2935	1.42216	0.484435	0.550798	0.880041	1.1092	1	0	797	580	cel:C44E4.5	hypothetical protein											_GAP_||PF04969
contig_9308_128_988_-	1374	8.8959	8.8152	7.1624	8.8064	7.6435	8.9121	6.7008	7.7188	6.1423	7.9465	10.271	10.163	4.8464	3.8158	5.6553	3.4881	1.7735	3.4355	8.29117	8.454	6.85397	9.46017	4.7725	2.89903	0.978373	0.7039	0.799333	1.31199	0.921974	0.975095	0.454339	0.999999	0	1171	861									KOG3126	Porin/voltage-dependent anion-selective channel protein	Inorganic ion transport and metabolism	METABOLISM	PF01459
contig_9706_222_743_+	1374	0.98843	0	1.0232	0.88064	1.6986	0.81019	0	0	1.0237	3.9733	4.7404	4.6907	4.8464	4.7698	5.6553	0	0	0	0.670543	1.12981	0.341233	4.46813	5.0905	0	0.580968	0.493844	0.591033	0.429258	0.490628	0	1.3296	1	0	968	522									KOG0402	60S ribosomal protein L37	Translation, ribosomal structure and biogenesis	INFORMATION STORAGE AND PROCESSING	_GAP_||PF01780
contig_116235_84_971_-	1374	0	0.97947	0	0.88064	0.84928	2.4306	0	0	0	1.5893	2.3702	1.5636	3.8771	1.9079	2.8277	1.744	3.5469	1.7178	0.32649	1.38684	0	1.84103	2.8709	2.33623	0.565497	0.904059	0	0.458452	0.985311	1.04855	0.837963	1	0	2050	888	olu:OSTLU_31330	HSP70D; Heat Shock Protein 70; K03283 heat shock 70kDa protein 1/8	olu04144||olu03040||olu04141	K03283	heat shock 70kDa protein 1/8	Spliceosome || MAPK sigling pathway || Protein processing in endoplasmic reticulum || Endocytosis || Antigen processing and presentation || Estrogen sigling pathway || Legionellosis || Toxoplasmosis || Measles || Influenza A || Epstein-Barr virus infection		A4RWG3					PF00012||_GAP_
contig_158556_869_1894_-	1374	0.98843	0	1.0232	1.7613	1.6986	2.4306	1.1168	2.2054	3.0711	0.79465	0.79006	0.78178	0.96928	0.95395	1.8851	0	0	0	0.670543	1.9635	2.1311	0.78883	1.26944	0	0.580968	0.405733	0.979266	0.00652257	0.533229	0	0.682262	1	0	2194	1026									KOG0815	60S acidic ribosomal protein P0	Translation, ribosomal structure and biogenesis	INFORMATION STORAGE AND PROCESSING	PF00466||_GAP_
contig_169799_1_214_+	1374	2.9653	2.9384	3.0696	2.6419	2.5478	2.4306	1.1168	1.1027	1.0237	2.384	1.5801	2.3453	0	0	0	1.744	1.7735	1.7178	2.9911	2.5401	1.08107	2.10313	0	1.7451	0.0693007	0.10586	0.0501787	0.453373	0	0.0278663	0.230355	0	0	1583	214	pti:PHATRDRAFT_49287	hypothetical protein						B7GA38
contig_199892_356_1557_-	1374	1.9769	1.9589	3.0696	2.6419	1.6986	1.6204	0	0	0	2.384	2.3702	1.5636	0	0	0	0	0	0	2.33513	1.98697	0	2.10593	0	0	0.63613	0.568535	0	0.469725	0	0	-0.19521	0	0.0202442	1558	1202	pti:PHATRDRAFT_45830	3-hydroxybutyrate dehydrogese (EC:1.1.1.30)						B7FYU0	KOG1610	Corticosteroid 11-beta-dehydrogese and related short chain-type dehydrogeses	Secondary metabolites biosynthesis, transport and catabolism	METABOLISM
contig_43519_53_1737_+	1374	0.98843	0	1.0232	0	1.6986	1.6204	0	0	0	1.5893	0	0.78178	0	0	0	0	0	1.7178	0.670543	1.10633	0	0.79036	0	0.5726	0.580968	0.95891	0	0.794685	0	0.991772	-0.659704	0	1	1962	1685	pti:PHATRDRAFT_54986	cell surface protein						B7G9B0
contig_124398_1_1208_+	1871	0	0	0	5.3626	3.5552	3.9188	0	0	0	0	0	0	0	0	0	0	0	0	0	4.27887	0	0	0	0	0	0.955986	0	0	0	0	0.727143	1	0	1600	1208													_GAP_||PF01118||PF02774
contig_32342_1_481_+	1871	1.5438	0	1.9448	1.7875	2.3701	2.6126	5.7345	6.0615	5.7545	3.7522	7.8877	4.2564	5.166	4.1139	3.6123	5.8103	7.2282	9.8166	1.16287	2.25673	5.85017	5.29877	4.2974	7.61837	1.02684	0.424071	0.183293	2.25621	0.792938	2.03145	0.560833	0.991177	0	481	481	tps:THAPSDRAFT_21815	AMS1; probable S-adenosylmethionine synthetase; K00789 S-adenosylmethionine synthetase [EC:2.5.1.6]	tps01100||tps01110||tps00270	K00789	S-adenosylmethionine synthetase [EC:2.5.1.6]	Cysteine and methionine metabolism || Biosynthesis of amino acids	2.5.1.6	B8BY55	KOG1506	S-adenosylmethionine synthetase	Coenzyme transport and metabolism	METABOLISM	PF02772||PF02773
contig_67880_1_1075_+	1871	0	0	0	0	0	0	1.4336	0	0	1.8761	1.3146	2.1282	2.952	1.6456	3.6123	5.084	4.8188	5.2355	0	0	0.477867	1.77297	2.73663	5.0461	0	0	0.827689	0.41649	1.00088	0.210919	1.68858	1	0	2070	1075	pti:PHATRDRAFT_54465	ISIP2A; iron starvation induced protein						B7FYL2
contig_93995_1_890_+	1871	2.3157	3.7141	3.8895	3.5751	4.7402	3.9188	1.4336	1.5154	1.4386	0	0	1.0641	1.476	0.82279	3.6123	1.4526	2.4094	1.3089	3.30643	4.07803	1.46253	0.3547	1.97036	1.72363	0.862471	0.598649	0.0458521	0.614358	1.45899	0.598222	0.132212	1.19e-05	0	1110	890	pmb:A9601_08281	rpe; ribulose-phosphate 3-epimerase (EC:5.1.3.1); K01783 ribulose-phosphate 3-epimerase [EC:5.1.3.1]	pmb01120||pmb00030||pmb01110||pmb00710||pmb00040||pmb01100	K01783	ribulose-phosphate 3-epimerase [EC:5.1.3.1]	Pentose phosphate pathway || Pentose and glucurote interconversions || Carbon fixation in photosynthetic organisms || Carbon metabolism || Biosynthesis of amino acids	5.1.3.1	A2BQQ1					_GAP_||PF00834||_GAP_
contig_117574_276_1864_-	1871	0	0	0	0	0	0	0	0	0	0	0	0	0	0	0	1.4526	0.80313	1.9633	0	0	0	0	0	1.40634	0	0	0	0	0	0.581467	1.00613	1	0	2570	1589	tps:THAPSDRAFT_5647	hypothetical protein						B8C3H8
contig_117779_144_677_-	1871	0	0	0	0	0	0	1.4336	1.5154	0	0	0	0	1.476	1.6456	0.72247	1.4526	2.4094	0.65444	0	0	0.983	0	1.28136	1.50548	0	0	0.852285	0	0.491383	0.878674	1.6512	1	4.05e-24	742	534
contig_101254_147_677_-	1374	2.9653	2.9384	3.0696	3.5225	4.2464	4.8611	0	2.2054	0	3.9733	3.9503	4.6907	2.9078	2.8619	1.8851	1.744	1.7735	5.1533	2.9911	4.21	0.735133	4.20477	2.5516	2.89027	0.0693007	0.670042	1.27329	0.420988	0.577662	1.9599	-0.146924	0	0.00734226	677	531
contig_111744_251_1292_-	1374	2.9653	2.9384	2.0464	3.5225	4.2464	4.051	3.3504	2.2054	4.0948	3.9733	3.9503	3.9089	2.9078	3.8158	3.7702	3.4881	5.3204	1.7178	2.65003	3.93997	3.21687	3.94417	3.49793	3.50877	0.522935	0.374505	0.951752	0.0326352	0.511579	1.80139	0.25885	0.00236675	0	1293	1042	tps:THAPSDRAFT_22197	hypothetical protein						B8BZ07					_GAP_||PF00248
contig_134211_1_1306_+	1374	0	0	0	0	0	0	2.2336	3.3081	2.0474	3.9733	3.9503	3.1271	5.8157	5.7237	6.5979	8.7202	10.641	10.307	0	0	2.5297	3.68357	6.04577	9.8894	0	0	0.680513	0.482051	0.480369	1.02624	-0.304433	0	0.0928491	1307	1306	pti:PHATRDRAFT_54466	hypothetical protein						B7FYL4
contig_160253_1_841_+	1374	2.9653	4.8973	3.0696	2.6419	2.5478	1.6204	3.3504	2.2054	5.1185	3.1786	2.3702	3.1271	1.9386	1.9079	1.8851	3.4881	3.5469	3.4355	3.64407	2.27003	3.5581	2.89197	1.91053	3.49017	1.08658	0.564563	1.46761	0.452596	0.026847	0.0557287	-2.87034	0	1	1068	841	pmb:A9601_08281	rpe; ribulose-phosphate 3-epimerase (EC:5.1.3.1); K01783 ribulose-phosphate 3-epimerase [EC:5.1.3.1]	pmb01120||pmb00030||pmb01110||pmb00710||pmb00040||pmb01100	K01783	ribulose-phosphate 3-epimerase [EC:5.1.3.1]	Pentose phosphate pathway || Pentose and glucurote interconversions || Carbon fixation in photosynthetic organisms || Carbon metabolism || Biosynthesis of amino acids	5.1.3.1	A2BQQ1					_GAP_||PF00834||_GAP_
contig_181880_538_811_+	1374	9.8843	9.7947	10.232	7.9257	7.6435	8.1019	6.7008	5.5134	5.1185	6.3572	6.3205	6.2542	0.96928	0.95395	0.94256	0	0	0	9.97033	7.89037	5.77757	6.31063	0.955263	0	0.230996	0.231234	0.823563	0.0522041	0.0134083	0
contig_56814_1357_1904_-	1374	3.9537	2.9384	5.116	1.7613	3.3971	1.6204	4.4672	2.2054	5.1185	3.9733	3.9503	5.4725	0	0	0	0	1.7735	1.7178	4.0027	2.2596	3.93037	4.46537	0	1.16377	1.08963	0.98762	1.52895	0.872279	0	1.00824	-0.709353	0	1	1905	548
contig_92888_258_338_-	1374	7.9075	10.774	11.255	10.568	9.342	13.773	14.518	12.13	12.285	9.5358	8.6907	7.036	10.662	10.493	10.368	10.464	8.8673	8.5888	9.97883	11.2277	12.9777	8.42083	10.5077	9.3067	1.80988	2.28797	1.33622	1.27156	0.147548	1.01188
contig_98152_64_720_+	1374	4.9422	4.8973	4.0928	3.5225	3.3971	4.051	2.2336	3.3081	4.0948	2.384	4.7404	3.1271	5.8157	6.6777	7.5404	8.7202	10.641	13.742	4.6441	3.65687	3.21217	3.41717	6.67793	11.0344	0.477967	0.34704	0.934301	1.20468	0.86235	2.53391	-0.200967	0	0.000937445	915	657	tps:THAPSDRAFT_985	hypothetical protein						B8BT04
contig_160811_41_538_+	1374	1.9769	0.97947	1.0232	0.88064	1.6986	0.81019	0	0	0	0	0	0	0	0	0	0	0	0	1.32652	1.12981	0	0	0	0	0.563667	0.493844	0	0	0	0	1.31448	1	0	699	498
contig_117376_1035_2443_+	1871	0.77189	0	0	0	0	0	5.7345	4.5462	5.7545	0.93805	0	1.0641	0.738	0.82279	1.4449	2.1789	1.6063	1.3089	0.257297	0	5.34507	0.667383	1.0019	1.69803	0.445651	0	0.691911	0.581397	0.385987	0.442195	0.649651	1	0	4311	1409									KOG1339	Aspartyl protease	Posttranslatiol modification, protein turnover, chaperones	CELLULAR PROCESSES AND SIGLING	_GAP_||PF00026
contig_71607_78_551_-	1871	3.8595	3.7141	1.9448	6.2564	8.2954	5.2251	2.8672	4.5462	2.8772	3.7522	3.9439	1.0641	7.38	6.5823	5.7797	5.8103	6.425	5.2355	3.1728	6.5923	3.4302	2.92007	6.58067	5.8236	1.06596	1.56247	0.966497	1.61017	0.800151	0.594862	0.710047	1	0	1960	474	ppp:PHYPADRAFT_104499	hypothetical protein; K03094 S-phase kise-associated protein 1	ppp04141||ppp04120||ppp04710	K03094	S-phase kise-associated protein 1	Cell cycle || Cell cycle - yeast || Oocyte meiosis || Ubiquitin mediated proteolysis || Protein processing in endoplasmic reticulum || Wnt sigling pathway || TGF-beta sigling pathway || Circadian rhythm || Herpes simplex infection		A9RG78	KOG1724	SCF ubiquitin ligase, Skp1 component	Posttranslatiol modification, protein turnover, chaperones	CELLULAR PROCESSES AND SIGLING	PF03931||PF01466
contig_17701_108_2127_+	1871	0	0	0	0	0	0	0	0	0	1.8761	1.3146	1.0641	2.214	1.6456	0.72247	2.1789	1.6063	1.9633	0	0	0	1.41827	1.52736	1.91617	0	0	0	0.415808	0.752763	0.289195	1.91416	1	0	2129	2020	lbj:LBJ_0661 || lbl:LBL_2418	hypothetical protein || hypothetical protein						Q04UT2
contig_67832_238_2665_-	1871	0	0	0	2.6813	3.5552	1.3063	0	0	0	0	0	0	0	0	0	0	0	0	0	2.51427	0	0	0	0	0	1.13372	0	0	0	0	-1.66568	0	1	2739	2428	ppp:PHYPADRAFT_144596	hypothetical protein; K13525 transitiol endoplasmic reticulum ATPase	ppp04141	K13525	transitiol endoplasmic reticulum ATPase	Protein processing in endoplasmic reticulum || Legionellosis		A9TF08	KOG0730	AAA+-type ATPase	Posttranslatiol modification, protein turnover, chaperones	CELLULAR PROCESSES AND SIGLING	PF02359||PF02933||_GAP_||PF00004||_GAP_||PF09336||_GAP_
contig_101561_1_644_-	1374	0	0	0	0	0	0	0	0	0	0.79465	1.5801	2.3453	4.8464	3.8158	4.7128	5.2321	5.3204	5.1533	0	0	0	1.57335	4.45833	5.23527	0	0	0	0.775347	0.560445	0.083595	-0.698122	0	0.954802	682	644	tet:TTHERM_01490730	hypothetical protein
contig_111949_1_1056_+	1374	8.8959	9.7947	9.2088	7.9257	8.4928	8.9121	8.9344	8.8215	8.1897	8.7412	8.6907	8.5996	6.785	6.6777	6.5979	6.9762	8.8673	8.5888	9.2998	8.44353	8.64853	8.67717	6.68687	8.1441	0.456258	0.495042	0.401351	0.0717635	0.0938862	1.02097	0.097787	7.3e-07	0	2140	1056	tps:THAPS_7191	hypothetical protein						B5YNL1					_GAP_||PF00248||_GAP_
contig_116833_196_510_-	1374	8.8959	8.8152	10.232	7.0451	8.4928	7.2917	4.4672	4.4108	4.0948	2.384	3.1602	3.1271	3.8771	2.8619	2.8277	3.4881	3.5469	3.4355	9.31437	7.60987	4.32427	2.89043	3.1889	3.49017	0.795717	0.77452	0.200715	0.438896	0.596244	0.0557287	-2.42398	0	1	510	315
contig_1545_981_1994_-	1374	5.9306	8.8152	6.1392	3.5225	5.0957	5.6713	3.3504	2.2054	5.1185	3.9733	3.1602	3.1271	1.9386	0.95395	0.94256	0	0	0	6.96167	4.76317	3.5581	3.4202	1.27837	0	1.60859	1.11233	1.46761	0.479284	0.571804	0	1.17538	1	0	2188	1014	tel:tlr1733	dK; molecular chaperone DK; K04043 molecular chaperone DK	tel03018	K04043	molecular chaperone DK	R degradation || Tuberculosis		Q8DI58					PF00012
contig_157834_1_853_+	1374	3.9537	3.9179	4.0928	1.7613	2.5478	2.4306	1.1168	4.4108	3.0711	2.384	3.1602	1.5636	2.9078	2.8619	2.8277	1.744	3.5469	1.7178	3.98813	2.24657	2.86623	2.36927	2.8658	2.33623	0.0923945	0.424319	1.65653	0.798402	0.0401922	1.04855	-0.371921	0	0.382302	1096	853	pti:PHATRDRAFT_50238	hypothetical protein						B7GDE8
contig_158342_130_1089_+	1374	5.9306	5.8768	5.116	11.448	11.041	11.343	3.3504	2.2054	3.0711	5.5626	7.1106	9.3814	3.8771	2.8619	2.8277	5.2321	5.3204	1.7178	5.64113	11.2773	2.87563	7.35153	3.1889	4.0901	0.455574	0.211297	0.597002	1.92077	0.596244	2.05495	0.139463	0	0	1665	960
contig_162180_1086_1757_+	1374	0.98843	0	0	3.5225	1.6986	2.4306	11.168	11.027	12.285	4.7679	4.7404	3.9089	9.6928	13.355	10.368	5.2321	7.0938	5.1533	0.329477	2.55057	11.4933	4.4724	11.1386	5.8264	0.57067	0.917849	0.689219	0.488199	1.94892	1.09831	0.490395	0.986561	0	2090	672													PF00082||_GAP_
contig_164578_120_869_+	1374	0	1.9589	0	2.6419	0.84928	0	3.3504	2.2054	3.0711	3.1786	2.3702	3.1271	4.8464	6.6777	3.7702	6.9762	1.7735	3.4355	0.652967	1.16373	2.87563	2.89197	5.0981	4.06173	1.13097	1.34873	0.597002	0.452596	1.47	2.65728	0.154006	0.00139437	0	1126	750	pti:PHATRDRAFT_50476	hypothetical protein						B7GE81	KOG1651	Glutathione peroxidase	Posttranslatiol modification, protein turnover, chaperones	CELLULAR PROCESSES AND SIGLING	_GAP_||PF00255||_GAP_
contig_185630_1_841_+	1374	0.98843	0	1.0232	2.6419	2.5478	1.6204	0	1.1027	1.0237	4.7679	5.5304	7.036	1.9386	1.9079	3.7702	0	0	0	0.670543	2.27003	0.7088	5.7781	2.5389	0	0.580968	0.564563	0.615108	1.15416	1.06645	0	0.795563	1	0	1048	841	dha:DEHA2B15268g || dha:DEHA2D12034g	DEHA2B15268p; K02938 large subunit ribosomal protein L8e || DEHA2D12034p	dha03010	K02938	large subunit ribosomal protein L8e	Ribosome		Q6BS28	KOG2309	60s ribosomal protein L2/L8	Translation, ribosomal structure and biogenesis	INFORMATION STORAGE AND PROCESSING	_GAP_||PF00181||PF03947
contig_33680_40_2009_+	1374	0	0.97947	1.0232	0	0	0.81019	1.1168	0	1.0237	0.79465	0.79006	1.5636	0.96928	0	0.94256	0	0	0	0.667557	0.270063	0.7135	1.04944	0.63728	0	0.578534	0.467763	0.61966	0.445284	0.552062	0	-0.567939	0	1	4051	1970	tps:THAPSDRAFT_25629	hypothetical protein; K02355 elongation factor G		K02355	elongation factor G			B8CET1	KOG0465	Mitochondrial elongation factor	Translation, ribosomal structure and biogenesis	INFORMATION STORAGE AND PROCESSING	_GAP_||PF00009||_GAP_||PF03144||PF14492||PF03764
contig_103974_1_3019_-	1871	0	0	0	0	0	0	1.4336	1.5154	2.8772	6.5664	5.2585	9.5769	4.428	4.9367	5.7797	5.084	6.425	5.8899	0	0	1.94207	7.13393	5.04813	5.79963	0	0	0.810881	2.21443	0.682705	0.675042	-0.216038	0	0.00222561	3212	3019													_GAP_||PF13385||_GAP_
contig_31019_1_706_-	1871	0	0	0	0	0	0	2.8672	1.5154	1.4386	7.5044	6.5731	9.5769	2.952	2.4684	2.1674	1.4526	2.4094	1.3089	0	0	1.9404	7.8848	2.52927	1.72363	0	0	0.80355	1.53761	0.395826	0.598222	-1.32579	6.45e-07	0.985463	706	706	cyt:cce_4841	hypothetical protein						B1X227
contig_40817_253_966_-	1871	0	0	0	0	0	0	0	0	0	1.8761	2.6292	2.1282	4.428	4.9367	3.6123	2.1789	3.2125	3.2722	0	0	0	2.21117	4.32567	2.88787	0	0	0	0.383344	0.668104	0.614708	0.280202	0.00755166	0	1150	714	pti:PHATRDRAFT_45813	hypothetical protein						B7FYR9					PF04755||_GAP_
contig_80193_418_933_-	1871	7.7189	12.999	13.613	8.9377	10.665	11.757	1.4336	1.5154	1.4386	0.93805	2.6292	2.1282	4.428	2.4684	3.6123	2.9052	4.0157	3.2722	11.4436	10.4532	1.46253	1.89848	3.5029	3.3977	3.24029	1.42153	0.0458521	0.868662	0.98437	0.565787	0.746666	1	0	1031	516	tel:tlr0298	rplL; 50S ribosomal protein L7/L12; K02935 large subunit ribosomal protein L7/L12	tel03010	K02935	large subunit ribosomal protein L7/L12	Ribosome		Q8DM25					_GAP_||PF00542
contig_119931_1_814_+	1871	0	0	0	0	0	0	0	0	0	0	0	0	0	0	0	2.1789	1.6063	1.9633	0	0	0	0	0	1.91617	0	0	0	0	0	0.289195	5.20636	1	0	1102	814
contig_124236_1234_2231_+	1871	0.77189	0	0	0	0	0	1.4336	1.5154	1.4386	0.93805	0	1.0641	0.738	0.82279	1.4449	0.72629	1.6063	0.65444	0.257297	0	1.46253	0.667383	1.0019	0.995677	0.445651	0	0.0458521	0.581397	0.385987	0.530034	-0.0963339	0	0.000589247	2912	998	tps:THAPSDRAFT_22197	hypothetical protein						B8BZ07					_GAP_||PF00248
contig_16218_402_1064_+	1871	0	0	0	0	0	0	0	0	0	0	0	0	0	0	0	0.72629	0.80313	1.9633	0	0	0	0	0	1.16424	0	0	0	0	0	0.693072	3.13233	1	0	1107	663	pti:PHATRDRAFT_54465	ISIP2A; iron starvation induced protein						B7FYL2
contig_72088_1_1779_-	1871	0	0	0	0	0	0	0	0	0	0	0	0	0.738	0.82279	0.72247	1.4526	0.80313	0.65444	0	0	0	0	0.761087	0.970057	0	0	0	0	0.0539979	0.424456	0.227048	0.0444248	0	1880	1779													_GAP_||PF00066||PF00051||_GAP_||PF00066||PF00051||_GAP_
contig_157291_1291_1902_-	1374	9.8843	8.8152	9.2088	11.448	9.342	11.343	11.168	12.13	13.308	11.92	11.851	11.727	8.7235	9.5395	10.368	10.464	14.188	12.024	9.30277	10.711	12.202	11.8327	9.54367	12.2253	0.540709	1.18675	1.07182	0.0977974	0.822258	1.87015	0.56909	1	0	2159	612									KOG0092	GTPase Rab5/YPT51 and related small G protein superfamily GTPases	Intracellular trafficking, secretion, and vesicular transport	CELLULAR PROCESSES AND SIGLING	PF00071
contig_160721_95_565_+	1374	2.9653	2.9384	2.0464	3.5225	1.6986	0.81019	5.584	4.4108	6.1423	7.1519	7.9006	6.2542	7.7543	7.6316	8.483	0	3.5469	3.4355	2.65003	2.01043	5.37903	7.10223	7.9563	2.32747	0.522935	1.38278	0.88376	0.824323	0.460243	2.01641	0.752326	1	0	1891	471	rno:29284	Rps14; ribosomal protein S14; K02955 small subunit ribosomal protein S14e							KOG0407	40S ribosomal protein S14	Translation, ribosomal structure and biogenesis	INFORMATION STORAGE AND PROCESSING	_GAP_||PF00411
contig_166567_1_964_+	1374	0.98843	1.9589	0	3.5225	2.5478	2.4306	3.3504	3.3081	2.0474	5.5626	6.3205	7.036	5.8157	6.6777	5.6553	0	0	1.7178	0.982443	2.83363	2.90197	6.30637	6.04957	0.5726	0.979464	0.599447	0.740379	0.736802	0.54986	0.991772	0.827345	1	0	1270	964									KOG0875	60S ribosomal protein L5	Translation, ribosomal structure and biogenesis	INFORMATION STORAGE AND PROCESSING	_GAP_||PF00861||PF14204
contig_55782_256_759_+	1374	2.9653	2.9384	3.0696	3.5225	2.5478	4.051	2.2336	2.2054	2.0474	3.9733	2.3702	2.3453	2.9078	3.8158	2.8277	3.4881	3.5469	3.4355	2.9911	3.37377	2.16213	2.89627	3.18377	3.49017	0.0693007	0.762557	0.100357	0.932821	0.54882	0.0557287
contig_65984_1_589_-	1374	0	0	0	0	0	0	0	0	0	0	0	0.78178	3.8771	3.8158	4.7128	12.208	10.641	13.742	0	0	0	0.260593	4.13523	12.197	0	0	0	0.451361	0.501126	1.55053	-0.497092	0.00185724	0.615115	589	589													PF13519
contig_84910_1_781_+	1374	0	0	0	0	0	0	0	0	0	2.384	3.9503	1.5636	4.8464	5.7237	3.7702	3.4881	3.5469	6.871	0	0	0	2.63263	4.7801	4.63533	0	0	0	1.21262	0.978436	1.93637	-0.370068	0	0.409273	781	781	pti:PHATRDRAFT_54465	ISIP2A; iron starvation induced protein						B7FYL2
contig_9262_1_981_+	1374	0.98843	0.97947	0	0.88064	0	0.81019	5.584	5.5134	5.1185	6.3572	5.5304	5.4725	8.7235	11.447	6.5979	5.2321	3.5469	1.7178	0.655967	0.56361	5.4053	5.7867	8.9228	3.49893	0.568101	0.48937	0.250872	0.494915	2.43069	1.75764	0.741328	1	0	1153	981	ppp:PHYPADRAFT_224024	hypothetical protein; K14753 guanine nucleotide-binding protein subunit beta-2-like 1 protein		K14753	guanine nucleotide-binding protein subunit beta-2-like 1 protein	Measles		A9TNV3	KOG0279	G protein beta subunit-like protein	Sigl transduction mechanisms	CELLULAR PROCESSES AND SIGLING	PF00400
contig_104980_1159_2292_+	1871	0	0	0	0	0	0	2.8672	3.0308	2.8772	5.6283	3.9439	7.4487	5.166	6.5823	7.2247	3.6314	2.4094	5.2355	0	0	2.92507	5.67363	6.32433	3.75877	0	0	0.0917042	1.75284	1.05331	1.41735	1.73895	1	0	2316	1134
contig_105729_321_664_-	1871	1.5438	1.8571	3.8895	4.4689	4.7402	6.5314	7.1681	7.5769	8.6317	5.6283	5.2585	4.2564	5.166	5.7595	5.7797	5.8103	5.6219	5.8899	2.43013	5.24683	7.79223	5.04773	5.5684	5.77403	1.27352	1.12071	0.755187	0.70982	0.348635	0.137632	3.29709	1	0	664	344													_GAP_||PF00467
contig_108434_92_544_-	1871	11.578	22.285	27.227	9.8315	9.4804	14.369	7.1681	9.0923	10.07	4.6903	3.9439	2.1282	2.952	4.1139	2.8899	3.6314	3.2125	2.6178	20.3633	11.227	8.7768	3.58747	3.3186	3.1539	7.99953	2.72674	1.47645	1.31771	0.68945	0.509335	-0.367636	0	3.32e-30	1105	453	smm:Smp_026560.2	calmodulin ; K02183 calmodulin	smm04070	K02183	calmodulin	Ras sigling pathway || Rap1 sigling pathway || Calcium sigling pathway || cGMP-PKG sigling pathway || Phosphatidylinositol sigling system || Oocyte meiosis || Adrenergic sigling in cardiomyocytes || Vascular smooth muscle contraction || Plant-pathogen interaction || Circadian entrainment || Long-term potentiation || Neurotrophin sigling pathway || Dopaminergic sypse || Olfactory transduction || P…		C4Q4E8	KOG0027	Calmodulin and related proteins (EF-Hand superfamily)	Sigl transduction mechanisms	CELLULAR PROCESSES AND SIGLING	PF13499||PF00036||PF13499||PF00036
contig_3456_1_1031_+	1871	0	0	0	0	0	0	12.903	10.608	11.509	18.761	21.034	19.154	14.76	19.747	16.617	18.157	16.063	18.324	0	0	11.6733	19.6497	17.0413	17.5147	0	0	1.15629	1.21486	2.52043	1.25995	2.55878	1	0	3395	1031													_GAP_||PF13517||PF01839
contig_68448_192_1064_+	1871	0	0	0	0	0	0	0	1.5154	1.4386	2.8142	2.6292	2.1282	1.476	1.6456	1.4449	2.1789	3.2125	1.9633	0	0	0.984667	2.52387	1.52217	2.45157	0	0	0.853611	0.354923	0.108021	0.667747	1.52662	1	0	3756	873	tps:THAPSDRAFT_34125	hypothetical protein						B8C250					_GAP_||PF10563
contig_110174_1_1943_+	1374	0	0	0	0	0	0	0	0	0	0	0.79006	0.78178	1.9386	0.95395	1.8851	3.4881	3.5469	3.4355	0	0	0	0.523947	1.59255	3.49017	0	0	0	0.45377	0.55369	0.0557287	0.0269409	0	0	2269	1943													_GAP_||PF00066||PF00051||_GAP_||PF00066||PF00051||PF00066||_GAP_
contig_115385_1_1016_+	1374	2.9653	0.97947	2.0464	6.1644	5.9449	3.2408	1.1168	1.1027	1.0237	0.79465	0	0.78178	0.96928	2.8619	1.8851	1.744	1.7735	1.7178	1.99706	5.1167	1.08107	0.525477	1.90543	1.7451	0.993834	1.62828	0.0501787	0.455122	0.946474	0.0278663	0.420556	0.789229	0	1316	1016									KOG0674	Calreticulin	Posttranslatiol modification, protein turnover, chaperones	CELLULAR PROCESSES AND SIGLING	PF00262
contig_116870_1_511_+	1374	5.9306	5.8768	5.116	2.6419	3.3971	3.2408	1.1168	2.2054	1.0237	3.1786	4.7404	3.9089	0.96928	0.95395	1.8851	6.9762	5.3204	3.4355	5.64113	3.09327	1.44863	3.94263	1.26944	5.24403	0.455574	0.398631	0.65703	0.781446	0.533229	1.77158	1.28209	1	0	655	511									KOG3406	40S ribosomal protein S12	Translation, ribosomal structure and biogenesis	INFORMATION STORAGE AND PROCESSING	_GAP_||PF01248
contig_158511_1053_1754_+	1374	7.9075	7.8357	7.1624	7.9257	6.7942	8.1019	12.285	12.13	12.285	16.688	16.591	17.199	10.662	10.493	11.311	22.673	23.055	20.613	7.6352	7.60727	12.2333	16.826	10.822	22.1137	0.411028	0.709626	0.0894893	0.326648	0.431834	1.31358	0.0259196	0	0	4586	702									KOG1353	F0F1-type ATP synthase, alpha subunit	Energy production and conversion	METABOLISM	PF00006||PF00306
contig_159204_326_1973_-	1374	15.815	14.692	18.418	17.613	16.136	14.583	14.518	11.027	12.285	19.866	16.591	15.636	12.601	13.355	13.196	10.464	14.188	13.742	16.3083	16.1107	12.61	17.3643	13.0507	12.798	1.91136	1.51516	1.76805	2.2185	0.397455	2.03357	0.0414283	0	0	1974	1648									KOG4716	Thioredoxin reductase	Posttranslatiol modification, protein turnover, chaperones	CELLULAR PROCESSES AND SIGLING	_GAP_||PF07992||_GAP_||PF02852
contig_162941_94_1023_+	1374	7.9075	8.8152	8.1856	9.687	10.191	9.7223	10.051	11.027	13.308	18.277	19.752	17.981	21.324	18.125	21.679	40.113	42.563	41.226	8.30277	9.86677	11.462	18.67	20.376	41.3007	0.465055	0.281348	1.67151	0.948655	1.95749	1.22671	0.264099	0	0	1679	930	tps:THAPSDRAFT_21815	AMS1; probable S-adenosylmethionine synthetase; K00789 S-adenosylmethionine synthetase [EC:2.5.1.6]	tps01100||tps01110||tps00270	K00789	S-adenosylmethionine synthetase [EC:2.5.1.6]	Cysteine and methionine metabolism || Biosynthesis of amino acids	2.5.1.6	B8BY55	KOG1506	S-adenosylmethionine synthetase	Coenzyme transport and metabolism	METABOLISM	PF00438||PF02772
contig_162944_1_759_+	1374	0.98843	0.97947	1.0232	0.88064	0	0	0	1.1027	1.0237	1.5893	1.5801	1.5636	1.9386	1.9079	2.8277	1.744	5.3204	5.1533	0.997033	0.293547	0.7088	1.57767	2.22473	4.07257	0.0230996	0.508438	0.615108	0.0130216	0.52241	2.01833	1.03483	1	0	1329	759	ppp:PHYPADRAFT_186654	cpk1; cpk1 calcium-dependent protein kise; K13412 calcium-dependent protein kise [EC:2.7.11.1]		K13412	calcium-dependent protein kise [EC:2.7.11.1]	Plant-pathogen interaction || Toxoplasmosis	2.7.11.1	E1C9R2					_GAP_||PF13499||PF13405||PF13202||PF13405
contig_16327_272_880_-	1374	14.827	15.671	13.302	15.851	18.684	18.634	18.986	13.232	13.308	15.098	15.801	15.636	11.631	11.447	12.253	15.696	19.508	15.46	14.6	17.723	15.1753	15.5117	11.777	16.888	1.2007	1.62139	3.30035	0.367623	0.42237	2.27205	0.733594	1	0	990	609	cre:CHLREDRAFT_60490	RABD1; small rab-related GTPase; K07874 Ras-related protein Rab-1A		K07874	Ras-related protein Rab-1A	Legionellosis		A8JHQ7||Q39571	KOG0084	GTPase Rab1/YPT1, small G protein superfamily, and related GTP-binding proteins	Sigl transduction mechanisms	CELLULAR PROCESSES AND SIGLING	PF00071||_GAP_
contig_163526_939_1797_-	1374	3.9537	4.8973	6.1392	2.6419	4.2464	4.051	2.2336	1.1027	1.0237	1.5893	1.5801	1.5636	1.9386	2.8619	2.8277	8.7202	10.641	10.307	4.99673	3.64643	1.45333	1.57767	2.54273	9.8894	1.09614	0.87542	0.676884	0.0130216	0.523474	1.02624	-4.37191	0	1	1798	859
contig_171671_1_1015_+	1374	0	0.97947	1.0232	5.2838	2.5478	4.8611	8.9344	9.9242	9.2134	3.1786	5.5304	5.4725	3.8771	2.8619	2.8277	1.744	0	0	0.667557	4.2309	9.35733	4.72717	3.1889	0.581333	0.578534	1.47285	0.510356	1.34141	0.596244	1.0069	-0.312455	0	0	1016	1015									KOG0101	Molecular chaperones HSP70/HSC70, HSP70 superfamily	Posttranslatiol modification, protein turnover, chaperones	CELLULAR PROCESSES AND SIGLING	PF00012
contig_185149_112_912_-	1374	6.919	5.8768	6.1392	7.9257	8.4928	8.9121	5.584	4.4108	5.1185	19.072	19.752	17.981	14.539	14.309	16.023	1.744	1.7735	1.7178	6.31167	8.44353	5.03777	18.935	14.957	1.7451	0.542083	0.495042	0.590752	0.893413	0.930318	0.0278663	0.900222	1	0	2602	801	tad:TRIADDRAFT_63312	expressed hypothetical protein ; K02930 large subunit ribosomal protein L4e	tad03010	K02930	large subunit ribosomal protein L4e	Ribosome		B3RZ62	KOG1475	Ribosomal protein RPL1/RPL2/RL4L4	R processing and modification	INFORMATION STORAGE AND PROCESSING	PF00573||PF14374||_GAP_
contig_55774_31_849_+	1374	3.9537	2.9384	4.0928	4.4032	4.2464	2.4306	8.9344	12.13	10.237	3.9733	4.7404	7.036	7.7543	7.6316	8.483	3.4881	1.7735	1.7178	3.66163	3.6934	10.4338	5.2499	7.9563	2.32647	0.630188	1.09642	1.60686	1.59365	0.460243	1.00639	-0.0123019	0	0	1172	819													PF01549
contig_59200_1026_1778_+	1374	0	0	0	0	0	0	0	0	0	2.384	3.1602	3.1271	9.6928	8.5856	6.5979	12.208	14.188	12.024	0	0	0	2.89043	8.2921	12.8067	0	0	0	0.438896	1.56819	1.1998	1.6878	1	1.3e-17	1918	753
contig_95597_282_785_-	1374	3.9537	3.9179	3.0696	3.5225	5.0957	4.8611	6.7008	6.6161	7.166	7.1519	10.271	8.5996	7.7543	10.493	9.4256	6.9762	3.5469	3.4355	3.64707	4.4931	6.82763	8.67417	9.2243	4.65287	0.500421	0.848709	0.296079	1.56089	1.3804	2.01284	0.854865	1	0	1070	504	ppp:PHYPADRAFT_171213 || ppp:PHYPADRAFT_148557	hypothetical protein || hypothetical protein; K02870 large subunit ribosomal protein L12e	ppp03010	K02870	large subunit ribosomal protein L12e	Ribosome		A9TPE0	KOG0886	40S ribosomal protein S2	Translation, ribosomal structure and biogenesis	INFORMATION STORAGE AND PROCESSING	PF03946||PF00298
contig_136548_257_955_-	1374	0.98843	0.97947	2.0464	1.7613	2.5478	2.4306	3.3504	3.3081	2.0474	3.1786	3.1602	1.5636	0.96928	0.95395	0	0	1.7735	0	1.3381	2.24657	2.90197	2.63413	0.641077	0.591167	0.613422	0.424319	0.740379	0.927155	0.555242	1.02393	0.243133	0	0	1839	699	bja:bll0440	atpD; F0F1 ATP synthase subunit beta (EC:3.6.3.14); K02112 F-type H+-transporting ATPase subunit beta [EC:3.6.3.14]	bja01100||bja00190	K02112	F-type H+-transporting ATPase subunit beta [EC:3.6.3.14]	Oxidative phosphorylation || Photosynthesis	3.6.3.14	Q89X74	KOG1350	F0F1-type ATP synthase, beta subunit	Energy production and conversion	METABOLISM	PF00006||PF00306
contig_108086_343_996_-	1871	16.982	24.142	23.337	17.875	21.331	15.675	14.336	13.638	14.386	3.7522	3.9439	3.1923	6.642	4.1139	5.7797	7.2629	4.0157	6.5444	21.487	18.2937	14.12	3.62947	5.51187	5.941	3.92215	2.85115	0.418172	0.390542	1.28516	1.70562	-0.842967	0	1	1221	654													PF01549
contig_119461_131_865_+	1871	22.385	3.7141	1.9448	7.1502	10.665	13.063	5.7345	6.0615	7.1931	11.257	14.461	22.346	18.45	23.038	23.119	8.7155	8.8344	14.398	9.34797	10.2927	6.3297	16.0213	21.5357	10.6493	11.325	2.97393	0.765393	5.70679	2.67257	3.24701	-0.48922	0	1	1214	735	pti:PHATRDRAFT_49287	hypothetical protein						B7GA38
contig_45337_1_717_+	1871	0	0	0	0	0	0	1.4336	3.0308	0	3.7522	1.3146	3.1923	6.642	7.4051	5.0573	5.084	5.6219	4.5811	0	0	1.48813	2.75303	6.36813	5.09567	0	0	1.51614	1.27679	1.19762	0.520498	1.47491	1	0	835	717	pti:PHATRDRAFT_7173	hypothetical protein; K00794 6,7-dimethyl-8-ribityllumazine synthase [EC:2.5.1.78]	pti01100||pti00740	K00794	6,7-dimethyl-8-ribityllumazine synthase [EC:2.5.1.78]	Riboflavin metabolism	2.5.1.78	B7FWC7	KOG3243	6,7-dimethyl-8-ribityllumazine synthase	Coenzyme transport and metabolism	METABOLISM	_GAP_||PF00885||_GAP_
contig_103750_1980_3961_-	1871	0	0	0	3.5751	1.1851	1.3063	0	0	0	0	0	0	0	0	0	0	0	0	0	2.02217	0	0	0	0	0	1.34624	0	0	0	0	-1.23663	0	1	4145	1982	tps:THAPSDRAFT_25629	hypothetical protein; K02355 elongation factor G		K02355	elongation factor G			B8CET1					PF00009||_GAP_||PF03144||PF14492||PF03764||PF00679
contig_158410_51_1132_+	1374	0.98843	0.97947	0	2.6419	1.6986	2.4306	2.2336	3.3081	5.1185	2.384	2.3702	2.3453	0.96928	0	2.8277	0	0	1.7178	0.655967	2.25703	3.5534	2.3665	1.26566	0.5726	0.568101	0.495023	1.45801	0.0196135	1.43696	0.991772	-0.191765	0	0	1413	1082	tps:THAPSDRAFT_40156	ATP synthase (EC:3.6.3.14); K02115 F-type H+-transporting ATPase subunit gamma [EC:3.6.3.14]	tps01100||tps00195||tps00190	K02115	F-type H+-transporting ATPase subunit gamma	Oxidative phosphorylation || Photosynthesis	3.6.3.14	B8C0W4	KOG1531	F0F1-type ATP synthase, gamma subunit	Energy production and conversion	METABOLISM	_GAP_||PF00231
contig_164323_1_1918_+	1374	15.815	15.671	16.371	18.493	21.232	16.204	18.986	18.746	15.356	19.072	16.591	17.199	11.631	13.355	10.368	17.44	17.735	18.895	15.9523	18.643	17.696	17.6207	11.7847	18.0233	0.369656	2.51735	2.03005	1.29313	1.49942	0.769161	0.16455	0	0	2116	1918	pti:PHATRDRAFT_18893	hypothetical protein; K00344 DPH2:quinone reductase [EC:1.6.5.5]		K00344	DPH2:quinone reductase [EC:1.6.5.5]		1.6.5.5	B7FTU0					_GAP_||PF03737||_GAP_||PF08240||PF00107||_GAP_
contig_87490_1_621_-	1374	0	0	0	0	0	0	1.1168	1.1027	1.0237	3.1786	3.1602	2.3453	4.8464	4.7698	3.7702	10.464	12.414	13.742	0	0	1.08107	2.8947	4.46213	12.2067	0	0	0.0501787	0.475883	0.600455	1.64881	0.113273	0.147281	0.0267985	621	621													PF13519
contig_33630_373_960_-	1374	0	0	0	0	0	0	0	0	0	0	0	0	0.96928	2.8619	2.8277	0	0	1.7178	0	0	0	0	2.21963	0.5726	0	0	0	0	1.08297	0.991772	1.30163	0.999994	3.31e-16	1378	588
contig_103927_174_928_-	1871	3.8595	3.7141	3.8895	3.5751	2.3701	1.3063	7.1681	7.5769	8.6317	3.7522	6.5731	5.3205	5.166	5.7595	5.0573	7.9892	8.8344	7.1988	3.82103	2.41717	7.79223	5.21527	5.3276	8.00747	0.0938139	1.13513	0.755187	1.41339	0.377964	0.817953	0.168725	0	0	928	755	pti:PHATRDRAFT_34120	hypothetical protein						B7FUS9					_GAP_||PF01081
contig_30552_1_835_-	1871	0	0	0	0	0	0	4.3008	3.0308	4.3159	9.3805	11.832	12.769	8.118	6.5823	7.9471	7.9892	4.8188	7.1988	0	0	3.8825	11.3272	7.54913	6.66893	0	0	0.737632	1.74975	0.841651	1.65028	-1.12846	0	1	1179	835
contig_40077_1_1628_+	1871	13.122	12.999	15.558	7.1502	3.5552	2.6126	15.77	15.154	15.825	9.3805	5.2585	8.5128	8.118	5.7595	7.2247	8.7155	7.2282	6.5444	13.893	4.43933	15.583	7.71727	7.03407	7.49603	1.44324	2.39452	0.372541	2.1731	1.19075	1.11005	-0.998869	0	1	2049	1628									KOG4716	Thioredoxin reductase	Posttranslatiol modification, protein turnover, chaperones	CELLULAR PROCESSES AND SIGLING	_GAP_||PF07992||_GAP_||PF02852
contig_124691_129_2676_+	1871	0	0	0	1.7875	0	1.3063	0	0	0	0	0	0	0.738	0.82279	2.1674	0.72629	0	0	0	1.03127	0	0	1.24273	0.242097	0	0.924944	0	0	0.801909	0.419324	0.218294	0	0	2822	2548									KOG0469	Elongation factor 2	Translation, ribosomal structure and biogenesis	INFORMATION STORAGE AND PROCESSING	PF00009||_GAP_||PF03144||PF14492||_GAP_||PF03764||PF00679
contig_25837_1_916_-	1871	0	0	0	0	0	0	1.4336	3.0308	2.8772	1.8761	2.6292	3.1923	0	0	0	0	0	0	0	0	2.4472	2.56587	0	0	0	0	0.881157	0.660382	0	0	-1.13989	0	1	1284	916
contig_139627_1_588_+	1374	8.8959	9.7947	9.2088	12.329	11.89	12.153	12.285	11.027	10.237	7.9465	8.6907	8.5996	5.8157	5.7237	4.7128	12.208	8.8673	10.307	9.2998	12.124	11.183	8.41227	5.4174	10.4608	0.456258	0.220932	1.03287	0.405929	0.611933	1.67565	-0.655863	0	1	678	588
contig_157009_1545_2075_-	1374	1.9769	1.9589	2.0464	2.6419	1.6986	2.4306	7.8176	7.7188	7.166	7.9465	8.6907	7.8178	13.57	14.309	15.081	13.952	14.188	15.46	1.99407	2.25703	7.56747	8.15167	14.32	14.5333	0.046207	0.495023	0.351172	0.471231	0.75556	0.811146	0.998909	1	0	2248	531									KOG1751	60s ribosomal protein L23	Translation, ribosomal structure and biogenesis	INFORMATION STORAGE AND PROCESSING	_GAP_||PF03939||PF00276
contig_185575_937_1493_-	1374	4.9422	4.8973	5.116	2.6419	2.5478	2.4306	1.1168	1.1027	1.0237	4.7679	5.5304	7.036	3.8771	3.8158	4.7128	8.7202	7.0938	8.5888	4.98517	2.5401	1.08107	5.7781	4.13523	8.13427	0.115508	0.10586	0.0501787	1.15416	0.501126	0.903463	0.953513	1	0	2678	557	tps:THAPSDRAFT_5456	hypothetical protein						B8C2Y9
contig_9114_211_1053_-	1374	33.607	34.281	32.742	29.942	28.875	32.408	26.803	26.465	23.545	21.456	21.332	23.453	28.109	29.573	29.219	38.369	37.243	41.226	33.5433	30.4083	25.6043	22.0803	28.967	38.946	0.771473	1.81208	1.79142	1.19038	0.76384	2.05323	0.207668	0	0	1054	843	tps:THAPSDRAFT_24512	hypothetical protein						B8CAG8
contig_133499_1_1832_+	1374	0	0	0	0	1.6986	0	0	0	1.0237	0.79465	0.79006	0.78178	1.9386	2.8619	2.8277	3.4881	3.5469	1.7178	0	0.5662	0.341233	0.78883	2.54273	2.9176	0	0.980687	0.591033	0.00652257	0.523474	1.03947	-0.548497	0	0.997883	1833	1832													_GAP_||PF00066||PF00051||_GAP_||PF00066||PF00051
contig_40098_244_1619_-	1871	0	0	0	0.89377	0	0	0	0	0	4.6903	0	3.1923	11.07	10.696	8.6696	5.8103	6.425	5.8899	0	0.297923	0	2.62753	10.1452	6.04173	0	0.516018	0	2.39561	1.29152	0.334296	1.3404	1	0	2577	1376
contig_9188_1_321_+	1871	0	0	0	0	0	0	0	0	0	0	0	0	0	0	0	1.4526	0.80313	1.3089	0	0	0	0	0	1.18821	0	0	0	0	0	0.341141
contig_116815_148_563_-	1374	0	0	1.0232	1.7613	2.5478	0.81019	0	0	0	9.5358	10.271	8.5996	8.7235	5.7237	7.5404	0	0	0	0.341067	1.70643	0	9.4688	7.3292	0	0.590745	0.870104	0	0.837712	1.51101	0	0.893126	1	0	563	416									KOG2988	60S ribosomal protein L30	Translation, ribosomal structure and biogenesis	INFORMATION STORAGE AND PROCESSING	_GAP_||PF01248
contig_11999_1_861_+	1374	6.919	7.8357	6.1392	5.2838	5.0957	6.4815	3.3504	4.4108	5.1185	7.9465	8.6907	7.8178	4.8464	5.7237	5.6553	5.2321	1.7735	1.7178	6.96463	5.62033	4.29323	8.15167	5.40847	2.9078	0.84917	0.751699	0.889894	0.471231	0.487964	2.0131	0.63075	0.999991	0	1177	861									KOG1626	Inorganic pyrophosphatase/Nucleosome remodeling factor, subunit NURF38	Energy production and conversion	METABOLISM	_GAP_||PF00719||_GAP_
contig_167711_366_881_-	1374	7.9075	6.8563	6.1392	5.2838	5.9449	8.1019	2.2336	2.2054	2.0474	3.1786	3.1602	3.1271	5.8157	1.9079	4.7128	3.4881	1.7735	3.4355	6.96767	6.44353	2.16213	3.1553	4.14547	2.89903	0.889395	1.47374	0.100357	0.0260973	2.01473	0.975095	0.439344	0.995508	0	1232	516	tps:THAPSDRAFT_28842	hypothetical protein						B8C4S9					PF00085||PF13848
contig_202625_47_661_+	1374	20.757	21.548	20.464	16.732	16.986	17.824	21.219	19.848	19.45	17.482	15.801	17.199	11.631	10.493	10.368	22.673	15.961	17.178	20.923	17.1807	20.1723	16.8273	10.8307	18.604	0.560741	0.571434	0.928027	0.900024	0.695921	3.57601	-1.36396	0	1	661	615	pti:PHATRDRAFT_23658	flavodoxin; K03839 flavodoxin I		K03839	flavodoxin I			B7GCM3					_GAP_||PF00258
contig_104903_108_971_-	1871	1.5438	1.8571	1.9448	1.7875	2.3701	1.3063	5.7345	4.5462	5.7545	4.6903	6.5731	8.5128	8.118	7.4051	6.5022	7.2629	7.2282	9.8166	1.7819	1.8213	5.34507	6.59207	7.34177	8.10257	0.210812	0.532705	0.691911	1.91132	0.80976	1.4845	-0.403107	0	0.386064	1474	864	tps:THAPSDRAFT_31394	aspartate aminotransferase (EC:2.6.1.- 2.6.1.1); K10206 LL-diaminopimelate aminotransferase [EC:2.6.1.83]	tps00300||tps01110	K10206	LL-diaminopimelate aminotransferase [EC:2.6.1.83]	Lysine biosynthesis || Biosynthesis of amino acids	2.6.1.83	B8BT02					PF00155
contig_18112_1_532_-	1871	0	0	0	0	0	0	0	4.5462	5.7545	12.195	0	15.961	14.022	13.987	16.617	11.621	17.669	12.434	0	0	3.43357	9.38533	14.8753	13.908	0	0	3.03431	8.3432	1.50843	3.28239	2.70283	1	0	532	532	pti:PHATRDRAFT_54465	ISIP2A; iron starvation induced protein						B7FYL2
contig_52211_133_850_-	1871	0.77189	0	0	0	0	0	8.6017	9.0923	7.1931	4.6903	3.9439	6.3846	8.856	9.0507	8.6696	6.5366	9.6376	8.5077	0.257297	0	8.2957	5.00627	8.85877	8.2273	0.445651	0	0.985884	1.25065	0.190565	1.5694	2.65832	1	0	850	718
contig_64685_1_478_-	1871	13.894	27.856	27.227	13.407	16.591	19.594	20.071	25.762	20.141	17.823	22.349	19.154	12.546	13.987	12.282	12.347	15.259	10.471	22.9923	16.5307	21.9913	19.7753	12.9383	12.6923	7.88566	3.09394	3.26568	2.32609	0.917715	2.41261	1.69289	1	1.83e-17	1666	478	ter:Tery_2202	F0F1 ATP synthase subunit B' (EC:3.6.3.14); K02109 F-type H+-transporting ATPase subunit b [EC:3.6.3.14]	ter01100||ter00190||ter00195	K02109	F-type H+-transporting ATPase subunit b	Oxidative phosphorylation || Photosynthesis	3.6.3.14	Q112Z3					PF00430
contig_20823_1_309_-	1871	0	0	0	0	0	0	0	0	0	0	0	0	1.476	1.6456	2.1674	1.4526	2.4094	4.5811	0	0	0	0	1.763	2.81437	0	0	0	0	0.360341	1.60308	3.65648	1	0	309	309	pti:PHATRDRAFT_54465	ISIP2A; iron starvation induced protein						B7FYL2
contig_108252_4057_5004_+	1374	0.98843	0.97947	2.0464	1.7613	1.6986	2.4306	4.4672	3.3081	3.0711	3.9733	4.7404	5.4725	1.9386	1.9079	2.8277	1.744	1.7735	3.4355	1.3381	1.9635	3.61547	4.72873	2.22473	2.31767	0.613422	0.405733	0.747081	0.749668	0.52241	0.968184	0.282476	0.102787	0	5369	948	amr:AM1_1794	tufB; elongation factor Tu; K02358 elongation factor Tu		K02358	elongation factor Tu	Plant-pathogen interaction		B0CCD0					PF00009||PF03144||PF03143
contig_117940_175_687_+	1374	3.9537	4.8973	7.1624	4.4032	3.3971	4.8611	3.3504	3.3081	2.0474	4.7679	3.9503	3.9089	2.9078	3.8158	3.7702	5.2321	7.0938	5.1533	5.3378	4.22047	2.90197	4.20903	3.49793	5.8264	1.64908	0.748911	0.740379	0.484435	0.511579	1.09831	0.478667	0.965013	0	897	513													PF00085||_GAP_
contig_133357_114_1132_+	1374	57.329	60.727	59.345	67.809	72.188	77.778	65.891	67.264	69.612	50.858	53.724	50.034	47.495	46.744	44.3	57.554	56.751	63.557	59.1337	72.5917	67.589	51.5387	46.1797	59.2873	1.70883	4.99674	1.88167	1.93688	1.67059	3.71937	0.0932649	0	0	1255	1019	ppp:PHYPADRAFT_150010	hypothetical protein; K00134 glyceraldehyde 3-phosphate dehydrogese [EC:1.2.1.12]	ppp01110||ppp00010||ppp01100	K00134	glyceraldehyde 3-phosphate dehydrogese [EC:1.2.1.12]	Glycolysis / Gluconeogenesis || Carbon fixation in photosynthetic organisms || Carbon metabolism || Biosynthesis of amino acids || HIF-1 sigling pathway || Alzheimer's disease	1.2.1.12	A9TSX3	KOG0657	Glyceraldehyde 3-phosphate dehydrogese	Carbohydrate transport and metabolism	METABOLISM	PF00044||PF02800
contig_1545_244_927_-	1374	0	0	2.0464	1.7613	1.6986	1.6204	1.1168	1.1027	1.0237	0.79465	0.79006	1.5636	4.8464	3.8158	2.8277	1.744	1.7735	1.7178	0.682133	1.69343	1.08107	1.04944	3.82997	1.7451	1.18149	0.0705919	0.0501787	0.445284	1.00942	0.0278663	1.40153	1	0	2188	684	cyu:UCYN_12640	chaperone protein DK; K04043 molecular chaperone DK	cyu03018	K04043	molecular chaperone DK	R degradation || Tuberculosis		D3ER30					PF00012
contig_160504_1394_1915_-	1374	18.78	19.589	18.418	13.21	12.739	16.204	10.051	13.232	11.261	12.714	11.851	13.29	11.631	12.401	12.253	12.208	14.188	13.742	18.929	14.051	11.5147	12.6183	12.095	13.3793	0.599551	1.87937	1.6056	0.724254	0.408593	1.03863	0.760993	1	0	2027	522	ppp:PHYPADRAFT_87691	hypothetical protein						A9T3R9	KOG0028	Ca2+-binding protein (centrin/caltractin), EF-Hand superfamily protein	Cytoskeleton	CELLULAR PROCESSES AND SIGLING	PF00036||PF13499||PF00036||PF13499||PF00036
contig_185063_1938_2777_-	1374	0.98843	1.9589	1.0232	5.2838	5.9449	4.051	7.8176	8.8215	7.166	3.9733	4.7404	2.3453	1.9386	2.8619	0.94256	0	0	0	1.32351	5.09323	7.93503	3.68633	1.91435	0	0.550538	0.961224	0.833974	1.22307	0.9599	0	-0.0941094	0	0	3042	840	ppp:PHYPADRAFT_176926	hypothetical protein; K01251 adenosylhomocysteise [EC:3.3.1.1]	ppp00270||ppp01100	K01251	adenosylhomocysteise [EC:3.3.1.1]	Cysteine and methionine metabolism	3.3.1.1	A9RPH2	KOG1370	S-adenosylhomocysteine hydrolase	Coenzyme transport and metabolism	METABOLISM	PF05221
contig_199333_1_1561_+	1374	1.9769	1.9589	2.0464	1.7613	2.5478	1.6204	2.2336	1.1027	2.0474	0.79465	0	0	0.96928	2.8619	1.8851	3.4881	7.0938	5.1533	1.99407	1.9765	1.79457	0.264883	1.90543	5.24507	0.046207	0.499751	0.606364	0.458791	0.946474	1.8046	-0.00714681	0	0	2687	1561	cre:CHLREDRAFT_156131	AMT1D; ammonium transporter						A8HSA2	KOG0682	Ammonia permease	Inorganic ion transport and metabolism	METABOLISM	_GAP_||PF00909
contig_32359_1_1574_-	1374	0	0	0	0	0	0	2.2336	1.1027	1.0237	7.9465	8.6907	7.036	8.7235	8.5856	7.5404	13.952	14.188	18.895	0	0	1.45333	7.89107	8.28317	15.6783	0	0	0.676884	0.828742	0.64694	2.78821	0.541683	0.842136	0	1575	1574	pti:PHATRDRAFT_47674	ISIP3; iron starvation induced protein						B7G4H8					_GAP_||PF03713||_GAP_
contig_59200_1_1017_+	1374	0	0	0	0	0	0	0	0	0	2.384	3.9503	3.1271	7.7543	7.6316	8.483	12.208	8.8673	12.024	0	0	0	3.1538	7.9563	11.0331	0	0	0	0.783491	0.460243	1.87789	-0.143789	0.0326676	0.193669	1918	1017
contig_63279_1_712_+	1374	0	0	0	0	0	0	0	0	0	3.1786	2.3702	3.1271	14.539	14.309	13.196	26.161	26.602	25.766	0	0	0	2.89197	14.0147	26.1763	0	0	0	0.452596	0.718252	0.418211	0.394287	0.496375	6.78e-08	902	712													_GAP_||PF13519
contig_67323_57_1541_-	1871	6.947	3.7141	3.8895	1.7875	3.5552	1.3063	11.469	10.608	14.386	6.5664	7.8877	8.5128	4.428	4.9367	4.3348	2.9052	4.0157	5.8899	4.8502	2.21633	12.1543	7.65563	4.5665	4.27027	1.818	1.18419	1.98005	0.993735	0.323972	1.50855	0.652677	0.999898	0	1542	1485									KOG1458	Fructose-1,6-bisphosphatase	Carbohydrate transport and metabolism	METABOLISM	_GAP_||PF00316||_GAP_
contig_140162_1_291_+	1374	22.734	23.507	22.51	20.255	18.684	25.116	18.986	16.54	19.45	17.482	19.752	18.763	19.386	18.125	19.794	26.161	28.375	29.202	22.917	21.3517	18.3253	18.6657	19.1017	27.9127	0.523086	3.35331	1.56345	1.13813	0.870071	1.57233	-0.0248179	0	0	436	291	pti:PHATRDRAFT_54360 || pti:PHATRDRAFT_11823	H2B-1b; histone H2B isoform 1b || H2B-1a; histone H2B isoform 1a; K11252 histone H2B						B7FWR8	KOG1744	Histone H2B	Chromatin structure and dymics	INFORMATION STORAGE AND PROCESSING	PF00125
contig_153894_573_947_-	1374	24.711	23.507	24.557	17.613	16.986	13.773	27.92	29.773	24.569	29.402	30.022	32.053	40.71	39.112	37.702	59.298	69.165	63.557	24.2583	16.124	27.4207	30.4923	39.1747	64.0067	0.655214	2.06002	2.63769	1.38667	1.50498	4.94885	1.54416	1	0	2186	375	tps:THAPSDRAFT_bd2088	RBL; ribulose-bisphosphate carboxylase, large subunit or chain, chloroplast, RuBisCo						A8DP56					PF00016
contig_16289_309_926_-	1374	23.722	31.343	22.51	21.135	19.533	21.065	18.986	20.951	19.45	15.098	20.542	20.326	27.14	32.434	27.334	31.393	31.922	27.484	25.8583	20.5777	19.7957	18.6553	28.9693	30.2663	4.78836	0.905385	1.02709	3.08263	3.00206	2.42405	0.513028	0.999999	0	1041	618	pti:PHATRDRAFT_33928	hypothetical protein						B7FU92
contig_55530_3383_4455_-	1374	0	0	0	0	0	0	5.584	3.3081	4.0948	5.5626	4.7404	5.4725	11.631	10.493	10.368	22.673	21.281	20.613	0	0	4.32897	5.2585	10.8307	21.5223	0	0	1.15588	0.450944	0.695921	1.05099	-0.0332149	1.32e-05	0.000312442	4501	1073	tps:THAPSDRAFT_814	hypothetical protein						B8LD32					_GAP_||PF10563||_GAP_
contig_112549_1_768_-	1871	0	0	0	0	0	0	18.637	21.215	20.141	27.204	30.236	24.474	19.926	22.215	20.229	21.062	30.519	18.979	0	0	19.9977	27.3047	20.79	23.52	0	0	1.29496	2.88232	1.24335	6.15014	2.93447	1	0	768	768	pti:PHATRDRAFT_54465	ISIP2A; iron starvation induced protein						B7FYL2					PF07692
contig_116394_1_838_+	1374	6.919	3.9179	5.116	7.9257	6.7942	6.4815	8.9344	9.9242	11.261	5.5626	7.9006	5.4725	11.631	11.447	10.368	8.7202	7.0938	6.871	5.31763	7.06713	10.0399	6.3119	11.1487	7.56167	1.51068	0.759801	1.1676	1.37659	0.682308	1.00948	0.0944877	0	0	1073	838													_GAP_||PF01549
contig_162974_441_1879_+	1374	5.9306	4.8973	7.1624	8.8064	7.6435	10.532	13.402	15.438	13.308	5.5626	7.9006	7.8178	4.8464	4.7698	4.7128	1.744	1.7735	1.7178	5.99677	8.99397	14.0493	7.09367	4.77633	1.7451	1.134	1.45336	1.20354	1.32659	0.0670392	0.0278663	0.419301	0.994499	0	2582	1439	olu:OSTLU_27198 || olu:OSTLU_27060 || olu:OSTLU_29711	EF1A3; Eukaryotic translation elongation factor 1 alpha; K03231 elongation factor 1-alpha || EF1A1; Eukaryotic elongation factor 1 alpha; K03231 elongation factor 1-alpha || EF1A2; Eukaryotic translation elongation factor 1 alpha	olu03013	K03231	elongation factor 1-alpha	R transport || Legionellosis		A4S6B6	KOG0052	Translation elongation factor EF-1 alpha/Tu	Translation, ribosomal structure and biogenesis	INFORMATION STORAGE AND PROCESSING	PF00009||PF03144||PF03143
contig_170828_173_787_-	1374	18.78	17.63	17.394	14.971	16.986	17.014	24.57	24.259	22.522	17.482	15.011	14.072	14.539	14.309	13.196	29.649	26.602	24.049	17.9347	16.3237	23.7837	15.5217	14.0147	26.7667	0.741529	1.17153	1.10365	1.76142	0.718252	2.80363	0.729262	1	0	1031	615	ppp:PHYPADRAFT_110619	RabG11; Rab7/RabG-family small GTPase; K07897 Ras-related protein Rab-7A	ppp04144||ppp04145	K07897	Ras-related protein Rab-7A	Endocytosis || Phagosome || Salmonella infection || Amoebiasis || Tuberculosis		A9U087	KOG0394	Ras-related GTPase	General function prediction only	POORLY CHARACTERIZED	PF00071
contig_185541_227_829_-	1374	11.861	12.733	14.325	9.687	9.342	11.343	6.7008	6.6161	8.1897	8.7412	7.1106	7.036	0	0	0.94256	0	1.7735	0	12.973	10.124	7.16887	7.62927	0.314187	0.591167	1.24941	1.06969	0.885081	0.963685	0.544187	1.02393	0.356802	0.135897	0	2268	603
contig_112834_183_953_+	1871	0	0	0	0	0	0	5.7345	6.0615	7.1931	30.018	30.236	30.859	22.878	24.684	20.952	27.599	27.306	24.214	0	0	6.3297	30.371	22.838	26.373	0	0	0.765393	0.43645	1.86632	1.87548	2.82439	1	0	953	771													PF13519||_GAP_
contig_117329_37_1068_+	1871	38.595	46.427	52.509	36.645	48.587	36.576	64.513	71.223	73.37	36.584	43.383	38.307	35.424	31.266	33.956	36.314	44.172	34.685	45.8437	40.6027	69.702	39.4247	33.5487	38.3903	6.97532	6.91472	4.62025	3.53461	2.10872	5.07289	0.820773	1	0	1408	1032	ppp:PHYPADRAFT_150010	hypothetical protein; K00134 glyceraldehyde 3-phosphate dehydrogese [EC:1.2.1.12]	ppp01110||ppp00010||ppp01100	K00134	glyceraldehyde 3-phosphate dehydrogese [EC:1.2.1.12]	Glycolysis / Gluconeogenesis || Carbon fixation in photosynthetic organisms || Carbon metabolism || Biosynthesis of amino acids || HIF-1 sigling pathway || Alzheimer's disease	1.2.1.12	A9TSX3	KOG0657	Glyceraldehyde 3-phosphate dehydrogese	Carbohydrate transport and metabolism	METABOLISM	PF00044||PF02800
contig_119121_30_1093_+	1871	0	0	0	2.6813	3.5552	2.6126	0	0	0	7.5044	10.517	9.5769	14.022	12.342	13.727	12.347	12.047	11.78	0	2.9497	0	9.19943	13.3637	12.058	0	0.525502	0	1.54136	0.897	0.28366	0.189406	0	0	1490	1064	pti:PHATRDRAFT_23717	hypothetical protein; K02641 ferredoxin--DP+ reductase [EC:1.18.1.2]	pti01100||pti00195	K02641	ferredoxin--DP+ reductase [EC:1.18.1.2]	Photosynthesis	1.18.1.2	B7GCT8					_GAP_||PF00175||_GAP_
contig_30569_189_1714_-	1871	0	0	0	11.619	8.2954	7.8377	2.8672	3.0308	1.4386	0.93805	0	1.0641	0.738	0.82279	0.72247	1.4526	0.80313	0.65444	0	9.2507	2.44553	0.667383	0.761087	0.970057	0	2.06374	0.875858	0.581397	0.0539979	0.424456	0.419079	0.630581	0	1715	1526	tps:THAPSDRAFT_21175	TKT2; transketolase (EC:2.2.1.1)						B8BTR4					PF00456||PF02779||PF02780
contig_179799_288_1597_-	1374	46.456	47.014	51.16	17.613	22.93	16.204	25.686	25.362	29.688	19.072	17.381	17.981	5.8157	10.493	9.4256	12.208	12.414	8.5888	48.21	18.9157	26.912	18.1447	8.5781	11.0703	2.56996	3.54718	2.40954	0.857298	2.45112	2.15148	0.155533	0	0	1677	1310	vcn:VOLCADRAFT_81546	pgk1; phosphoglycerate kise; K00927 phosphoglycerate kise [EC:2.7.2.3]							KOG1367	3-phosphoglycerate kise	Carbohydrate transport and metabolism	METABOLISM	_GAP_||PF00162
contig_202285_281_1618_+	1374	0	0	0	0	0	0	1.1168	0	0	3.9733	3.9503	3.9089	6.785	7.6316	6.5979	12.208	12.414	10.307	0	0	0.372267	3.94417	7.00483	11.643	0	0	0.644785	0.0326352	0.550798	1.16159	0.047826	0.00179668	0.000155719	1619	1338													PF13517
contig_112075_1_1046_+	1871	0.77189	0	0	8.9377	4.7402	5.2251	5.7345	3.0308	4.3159	1.8761	3.9439	4.2564	0.738	0.82279	0.72247	0.72629	2.4094	1.3089	0.257297	6.301	4.3604	3.3588	0.761087	1.48153	0.445651	2.29628	1.3524	1.29353	0.0539979	0.854731	-0.483147	0	0.908999	1955	1046									KOG1353	F0F1-type ATP synthase, alpha subunit	Energy production and conversion	METABOLISM	_GAP_||PF02874||_GAP_||PF00006
contig_102721_1_1004_+	1871	4.6314	7.4283	7.7791	3.5751	3.5552	3.9188	7.1681	7.5769	10.07	6.5664	6.5731	7.4487	5.166	4.1139	3.6123	4.3577	6.425	3.2722	6.61293	3.68303	8.27167	6.86273	4.2974	4.68497	1.725	0.204422	1.57076	0.507473	0.792938	1.60168	0.0367501	0.000104928	3.07e-05	1823	1004	aeh:Mlg_2534	DPH-glutathione reductase (EC:1.8.1.7); K00383 glutathione reductase (DPH) [EC:1.8.1.7]	aeh00480	K00383	glutathione reductase (DPH) [EC:1.8.1.7]	Glutathione metabolism || Thyroid hormone synthesis	1.8.1.7	Q0A5L3					PF07992||_GAP_
contig_125315_242_412_+	1871	0	0	0	0	0	0	0	0	0	3.7522	5.2585	3.1923	1.476	0.82279	2.8899	2.9052	3.2125	2.6178	0	0	0	4.06767	1.72956	2.91183	0	0	0	1.06861	1.05663	0.297405	2.39208	1	8.35e-25	672	171
contig_9330_1_1562_+	1374	21.746	18.61	20.464	17.613	16.136	16.204	20.102	18.746	18.427	13.509	16.591	17.199	17.447	17.171	16.966	33.137	30.149	29.202	20.2733	16.651	19.0917	15.7663	17.1947	30.8293	1.57667	0.83381	0.889393	1.9784	0.241372	2.05382	0.202176	0	0	1918	1562	aeh:Mlg_2534	DPH-glutathione reductase (EC:1.8.1.7); K00383 glutathione reductase (DPH) [EC:1.8.1.7]	aeh00480	K00383	glutathione reductase (DPH) [EC:1.8.1.7]	Glutathione metabolism || Thyroid hormone synthesis	1.8.1.7	Q0A5L3					_GAP_||PF07992||_GAP_||PF02852
contig_15531_115_1220_-	1871	5.4033	7.4283	1.9448	28.601	26.071	28.738	17.203	19.7	18.702	21.575	23.663	23.41	25.83	20.57	20.952	24.694	30.519	27.486	4.92547	27.8033	18.535	22.8827	22.4507	27.5663	2.7728	1.50181	1.25685	1.13952	2.93281	2.91333	0.247988	0	0	1255	1106									KOG0657	Glyceraldehyde 3-phosphate dehydrogese	Carbohydrate transport and metabolism	METABOLISM	PF00044||PF02800||_GAP_
contig_73442_400_1787_-	1871	31.648	33.427	33.061	13.407	11.851	6.5314	4.3008	1.5154	2.8772	56.283	65.731	57.461	33.21	32.089	31.788	23.968	23.291	27.486	32.712	10.5965	2.8978	59.825	32.3623	24.915	0.939447	3.60539	1.39281	5.14855	0.749369	2.25214	-1.18088	0	1	1803	1388													_GAP_||PF02812||PF00208
contig_205545_255_673_-	1374	0	0	0	0	0	0	0	0	1.0237	3.9733	4.7404	3.9089	6.785	6.6777	5.6553	6.9762	7.0938	8.5888	0	0	0.341233	4.20753	6.37267	7.55293	0	0	0.591033	0.462598	0.62357	0.899012	0.935428	0.997538	1.35e-13	673	419
contig_84443_1_798_-	1374	0	0	0	0.88064	0	0.81019	2.2336	2.2054	1.0237	3.1786	4.7404	5.4725	12.601	12.401	14.138	31.393	33.696	36.073	0	0.56361	1.8209	4.46383	13.0467	33.7207	0	0.48937	0.690539	1.17169	0.950398	2.3401	-0.191387	0	0.00813964	798	798	pti:PHATRDRAFT_54465	ISIP2A; iron starvation induced protein						B7FYL2					_GAP_||PF07692
contig_104613_132_1675_-	1871	0	0	0	0	0	0	0	0	0	5.6283	3.9439	5.3205	4.428	4.9367	3.6123	7.9892	6.425	7.1988	0	0	0	4.96423	4.32567	7.20433	0	0	0	0.896937	0.668104	0.782115	4.14813	1	0	1713	1544	ota:Ot13g01050	periplasmic-binding protein of ABC transporter alr4031 (ISS)						Q00X78
contig_124991_1_760_+	1871	17.754	22.285	29.172	19.663	21.331	22.207	25.805	25.762	21.579	13.133	18.405	14.897	13.284	13.165	13.727	15.252	15.259	15.707	23.0703	21.067	24.382	15.4783	13.392	15.406	5.74937	1.29238	2.42756	2.68365	0.296157	0.260697	1.14451	1	0	2219	760	vcn:VOLCADRAFT_72905	hypothetical protein; K02638 plastocyanin											_GAP_||PF00127
contig_45934_1_1582_+	1871	1.5438	0	0	11.619	11.851	10.45	2.8672	0	1.4386	0	0	1.0641	0	0.82279	0.72247	0	0	0	0.5146	11.3067	1.43527	0.3547	0.515087	0	0.891313	0.750909	1.4336	0.614358	0.448889	0	0.275799	0	0	1887	1582									KOG1350	F0F1-type ATP synthase, beta subunit	Energy production and conversion	METABOLISM	_GAP_||PF02874||_GAP_||PF00006||PF00306
contig_6334_1_330_+	1871	0	0	0	0	0	0	0	0	0	2.8142	3.9439	3.1923	3.69	4.1139	3.6123	5.8103	4.8188	3.9266	0	0	0	3.3168	3.8054	4.8519	0	0	0	0.575048	0.269979	0.942286	5.75705	1	0	680	330
contig_158971_45_1348_+	1374	29.653	31.343	29.673	29.942	30.574	30.787	27.92	30.875	27.64	19.866	23.702	23.453	22.293	23.849	20.736	34.881	35.469	34.355	30.223	30.4343	28.8117	22.3403	22.2927	34.9017	0.97	0.439473	1.79238	2.14645	1.5565	0.557287	-0.0633878	0	0	1554	1304	tps:THAPSDRAFT_31394	aspartate aminotransferase (EC:2.6.1.- 2.6.1.1); K10206 LL-diaminopimelate aminotransferase [EC:2.6.1.83]	tps00300||tps01110	K10206	LL-diaminopimelate aminotransferase [EC:2.6.1.83]	Lysine biosynthesis || Biosynthesis of amino acids	2.6.1.83	B8BT02					_GAP_||PF00155
contig_171255_183_874_-	1374	4.9422	3.9179	4.0928	6.1644	6.7942	8.1019	8.9344	7.7188	6.1423	7.9465	9.4807	8.5996	6.785	6.6777	5.6553	6.9762	7.0938	5.1533	4.31763	7.02017	7.5985	8.6756	6.37267	6.40777	0.547914	0.988318	1.39993	0.769918	0.62357	1.08799	0.365493	9.9e-05	0	874	692	ddi:DDB_G0289811	act10; hypothetical protein; K10355 actin, other eukaryote		K10355	actin, other eukaryote			Q54GX7	KOG0676	Actin and related proteins	Cytoskeleton	CELLULAR PROCESSES AND SIGLING	PF00022
contig_84595_1_821_+	1374	0	0	0	0	0	0	0	0	0	0	0	0	0.96928	0.95395	0.94256	8.7202	7.0938	10.307	0	0	0	0	0.955263	8.707	0	0	0	0	0.0134083	1.60664	0.615442	0.917167	6.9e-11	1009	821													_GAP_||PF13519
contig_75041_1_587_-	1871	0	0	0	0	0	0	4.3008	4.5462	4.3159	20.637	21.034	20.218	10.332	12.342	11.559	13.073	14.456	11.125	0	0	4.38763	20.6297	11.411	12.8847	0	0	0.13753	0.408049	1.01314	1.67347	1.06653	0.999995	0	1685	587													PF13519
contig_86165_256_539_-	1374	0	0	0	0	0	0	0	0	0	1.5893	1.5801	0.78178	7.7543	7.6316	6.5979	6.9762	8.8673	10.307	0	0	0	1.31706	7.32793	8.71683	0	0	0	0.463589	0.635197	1.67049
contig_104200_19_1523_-	1871	6.1752	1.8571	3.8895	16.982	16.591	16.982	34.407	28.792	28.772	22.513	22.349	24.474	9.594	9.0507	8.6696	10.894	8.8344	11.78	3.97393	16.8517	30.657	23.112	9.10477	10.5028	2.16029	0.225744	3.24761	1.18237	0.464566	1.51126	2.52223	1	0	2754	1505	cyt:cce_4488	atpA1; F0F1 ATP synthase subunit alpha; K02111 F-type H+-transporting ATPase subunit alpha [EC:3.6.3.14]	cyt01100||cyt00195||cyt00190	K02111	F-type H+-transporting ATPase subunit alpha [EC:3.6.3.14]	Oxidative phosphorylation || Photosynthesis	3.6.3.14	B1WUI2					PF02874||_GAP_||PF00006||PF00306||_GAP_
contig_117437_56_1033_+	1871	6.947	5.5712	9.7239	16.088	14.221	16.982	4.3008	3.0308	7.1931	5.6283	9.2024	9.5769	5.166	4.1139	3.6123	2.9052	3.2125	3.2722	7.41403	15.7637	4.84157	8.13587	4.2974	3.12997	2.11538	1.40878	2.13319	2.17967	0.792938	0.196929	0.773712	1	0	1163	978									KOG0676	Actin and related proteins	Cytoskeleton	CELLULAR PROCESSES AND SIGLING	PF00022
contig_109149_1_1146_+	1374	39.537	42.117	45.021	36.987	35.67	37.269	33.504	35.286	37.877	12.714	11.851	11.727	7.7543	10.493	10.368	19.185	23.055	18.895	42.225	36.642	35.5557	12.0973	9.53843	20.3783	2.74359	0.853504	2.19894	0.537636	1.54637	2.32259	-3.6167	0	1	1622	1146									KOG1458	Fructose-1,6-bisphosphatase	Carbohydrate transport and metabolism	METABOLISM	_GAP_||PF00316
contig_48296_131_1480_-	1374	0	0	0	0	0	0	0	0	0	0	0	0	0.96928	1.9079	0.94256	12.208	12.414	12.024	0	0	0	0	1.27325	12.2153	0	0	0	0	0.549788	0.195103	0.0960006	0.010778	0.000132096	1481	1350													_GAP_||PF01764||_GAP_
contig_112852_747_1852_-	1871	1.5438	1.8571	1.9448	1.7875	3.5552	1.3063	10.035	12.123	12.948	2.8142	3.9439	4.2564	0.738	0.82279	1.4449	0.72629	0	0	1.7819	2.21633	11.702	3.6715	1.0019	0.242097	0.210812	1.18419	1.50144	0.758707	0.385987	0.419324	-1.95277	0	1	1897	1106									KOG1458	Fructose-1,6-bisphosphatase	Carbohydrate transport and metabolism	METABOLISM	_GAP_||PF00316
contig_103731_1_1035_+	1871	0	0	0	0	0	0	4.3008	3.0308	5.7545	4.6903	3.9439	6.3846	2.214	1.6456	1.4449	0	0	0	0	0	4.36203	5.00627	1.76817	0	0	0	1.36288	1.25065	0.398931	0	-1.12667	0	1	2542	1035	mme:Marme_1228	outer membrane assembly lipoprotein YfgL
contig_81829_1836_2861_-	1374	0	0	0	0	0	0	0	0	0	0.79465	0	0.78178	2.9078	1.9079	0.94256	0	0	0	0	0	0	0.525477	1.91942	0	0	0	0	0.455122	0.982671	0	-3.09044	0	1	3318	1026	ote:Oter_4248	cell surface receptor IPT/TIG domain-containing protein						B1ZP35
contig_68024_264_2093_-	1871	0	0	0	0.89377	0	1.3063	24.371	25.762	28.772	59.097	69.675	55.333	34.686	27.975	29.621	18.883	12.047	16.361	0	0.733357	26.3017	61.3683	30.7607	15.7637	0	0.667761	2.24958	7.43589	3.49764	3.45692	0.867295	1	0	2095	1830	pti:PHATRDRAFT_47674	ISIP3; iron starvation induced protein						B7G4H8					_GAP_||PF03713||_GAP_
contig_108140_31_1454_-	1871	0	0	0	0	0	0	0	1.5154	1.4386	0	0	0	0.738	0.82279	0.72247	0.72629	0.80313	1.3089	0	0	0.984667	0	0.761087	0.946107	0	0	0.853611	0	0.0539979	0.316529	1.37798	1	0	1476	1424	pti:PHATRDRAFT_50163	hypothetical protein						B7GD57
contig_81829_1_1803_-	1374	0	0	0	0	0	11.343	0	0	10.237	7.1519	4.7404	6.2542	5.8157	7.6316	7.5404	0	7.0938	3.4355	0	3.781	3.41233	6.04883	6.9959	3.50977	0	6.54888	5.91033	1.2188	1.0231	3.54748	-2.69887	0	1	3318	1803
contig_98724_92_1027_+	1871	4.6314	1.8571	0	20.557	20.146	24.819	8.6017	6.0615	5.7545	51.593	60.473	46.82	31.734	31.266	35.401	22.515	17.669	23.56	2.16283	21.8407	6.8059	52.962	32.8003	21.248	2.33079	2.58749	1.56277	6.92869	2.26437	3.14324	2.55403	1	0	2205	936	nwa:Nwat_2772	ribulose-bisphosphate carboxylase (EC:4.1.1.39); K01601 ribulose-bisphosphate carboxylase large chain [EC:4.1.1.39]	nwa01120||nwa01100||nwa00630||nwa00710	K01601	ribulose-bisphosphate carboxylase large chain [EC:4.1.1.39]	Glyoxylate and dicarboxylate metabolism || Carbon fixation in photosynthetic organisms || Carbon metabolism	4.1.1.39	D8KAW1					PF02788||PF00016
contig_190117_1_1573_+	1374	0	0	0	0	0	0	5.584	5.5134	6.1423	15.098	15.801	15.636	26.171	25.757	27.334	45.345	42.563	46.379	0	0	5.74657	15.5117	26.4207	44.7623	0	0	0.344528	0.367623	0.817608	1.9736	-0.900128	0	1	1574	1573	ttu:TERTU_0511	FG-GAP repeat domain-containing protein						C5BN17					_GAP_||PF13517||PF01839||PF13517||_GAP_
contig_153894_980_1963_-	1374	17.792	20.569	21.487	15.851	13.588	17.824	34.621	31.978	29.688	38.143	45.034	42.216	46.526	55.329	46.185	90.69	88.673	92.759	19.9493	15.7543	32.0957	41.7977	49.3467	90.7073	1.92386	2.11965	2.4686	3.46449	5.18366	2.04306	1.33341	1	0	2186	984	nwa:Nwat_2772	ribulose-bisphosphate carboxylase (EC:4.1.1.39); K01601 ribulose-bisphosphate carboxylase large chain [EC:4.1.1.39]	nwa01120||nwa01100||nwa00630||nwa00710	K01601	ribulose-bisphosphate carboxylase large chain [EC:4.1.1.39]	Glyoxylate and dicarboxylate metabolism || Carbon fixation in photosynthetic organisms || Carbon metabolism	4.1.1.39	D8KAW1					PF02788||PF00016
contig_82342_965_1668_-	1374	0	0	0	0	0	0	0	0	0	0	0	0	0	0	0	8.7202	7.0938	8.5888	0	0	0	0	0	8.13427	0	0	0	0	0	0.903463	0.677758	0.687595	0.0268307	1669	704													PF13519||_GAP_
contig_168270_1_828_+	1374	0	0	0	0	0	0	0	0	0	0.79465	0	0.78178	0.96928	0.95395	0.94256	3.4881	3.5469	3.4355	0	0	0	0.525477	0.955263	3.49017	0	0	0	0.455122	0.0134083	0.0557287	1.47589	1	0	1005	828													PF01549
contig_71332_335_1024_+	1871	0	0	0	3.5751	1.1851	2.6126	11.469	13.638	14.386	17.823	22.349	28.731	16.974	18.101	20.952	12.347	7.2282	15.052	0	2.4576	13.1643	22.9677	18.6757	11.5424	0	1.20252	1.51509	5.48025	2.05032	3.97347	2.00522	1	0	1507	690
contig_9636_66_992_+	1374	33.607	32.322	32.742	30.822	28.875	35.648	21.219	25.362	23.545	27.018	26.862	28.926	25.201	24.803	26.392	36.625	35.469	39.508	32.8903	31.7817	23.3753	27.602	25.4653	37.2007	0.655216	3.48699	2.0767	1.14927	0.826822	2.08013	0.448328	0.99982	0	1152	927	pti:PHATRDRAFT_20331	PsbO; oxygen-evolving enhancer protein 1 precursor; K02716 photosystem II oxygen-evolving enhancer protein 1	pti01100||pti00195	K02716	photosystem II oxygen-evolving enhancer protein 1	Photosynthesis		B7FZ96					_GAP_||PF01716
contig_5958_1_726_+	1871	0	0	0	0	0	0	0	0	0	1.8761	1.3146	1.0641	2.214	2.4684	2.1674	2.9052	3.2125	3.2722	0	0	0	1.41827	2.28327	3.12997	0	0	0	0.415808	0.162014	0.196929	4.88758	1	0	921	726													PF01549
contig_153894_99_518_-	1374	28.665	29.384	30.696	16.732	16.136	14.583	31.27	30.875	28.664	39.733	44.243	42.216	45.556	41.974	44.3	81.97	86.899	82.452	29.5817	15.817	30.2697	42.064	43.9433	83.7737	1.02983	1.10945	1.4045	2.25884	1.81744	2.71733	1.14214	1	0	2186	420	cti:RALTA_B1701	cbbS; ribulose bisphosphate carboxylase (rubisco), small subunit (EC:4.1.1.39); K01602 ribulose-bisphosphate carboxylase small chain [EC:4.1.1.39]	cti00630||cti01120||cti01100||cti00710	K01602	ribulose-bisphosphate carboxylase small chain [EC:4.1.1.39]	Glyoxylate and dicarboxylate metabolism || Carbon fixation in photosynthetic organisms || Carbon metabolism	4.1.1.39	B3RBL7					PF00101||_GAP_
contig_200318_7237_7923_-	1374	0	0	0	0.88064	0.84928	0.81019	5.584	5.5134	6.1423	8.7412	11.061	9.3814	18.416	17.171	16.966	19.185	21.281	15.46	0	0.846703	5.74657	9.72787	17.5177	18.642	0	0.0352956	0.344528	1.19808	0.784703	2.94824	0.448764	0.63568	0	8096	687
contig_157797_983_1840_-	1374	24.711	25.466	23.534	22.016	21.232	22.685	27.92	29.773	33.782	28.608	29.232	29.708	28.109	30.527	27.334	47.089	51.43	44.662	24.5703	21.9777	30.4917	29.1827	28.6567	47.727	0.973651	0.727258	2.99635	0.551657	1.66546	3.42881	1.47304	1	0	2047	858													PF02874||_GAP_||PF00006
contig_156394_983_2847_+	1374	5.9306	5.8768	5.116	12.329	11.041	14.583	16.752	20.951	19.45	20.661	22.122	17.199	28.109	22.895	22.621	13.952	14.188	10.307	5.64113	12.651	19.051	19.994	24.5417	12.8157	0.455574	1.79282	2.12775	2.52837	3.09244	2.17577	0.490528	1	0	7946	1865									KOG0100	Molecular chaperones GRP78/BiP/KAR2, HSP70 superfamily	Posttranslatiol modification, protein turnover, chaperones	CELLULAR PROCESSES AND SIGLING	PF00012
contig_19507_1_696_+	1374	0	0	0	0	0	0	0	0	0	1.5893	2.3702	3.1271	3.8771	3.8158	0.94256	1.744	3.5469	3.4355	0	0	0	2.3622	2.87849	2.9088	0	0	0	0.768931	1.67684	1.01028	1.38743	1	0	865	696													PF01549
contig_77487_1_846_+	1871	0	0	0	0	0	0	2.8672	3.0308	1.4386	4.6903	5.2585	4.2564	6.642	5.7595	3.6123	7.9892	8.0313	7.1988	0	0	2.44553	4.73507	5.33793	7.73977	0	0	0.875858	0.502548	1.55822	0.468964	4.04266	1	0	1024	846													PF01549
contig_104469_175_1466_-	1871	47.086	29.713	29.172	8.9377	5.9253	5.2251	70.247	74.254	77.686	43.15	38.124	35.115	13.284	12.342	13.004	5.084	7.2282	4.5811	35.3237	6.69603	74.0623	38.7963	12.8767	5.6311	10.1901	1.97266	3.7232	4.05947	0.483737	1.4058	-1.84411	0	1	1543	1292									KOG1458	Fructose-1,6-bisphosphatase	Carbohydrate transport and metabolism	METABOLISM	_GAP_||PF00316
contig_132741_72_1363_+	1374	66.225	60.727	62.415	62.525	63.696	68.866	68.125	71.675	67.565	29.402	30.022	29.708	25.201	25.757	20.736	48.833	53.204	56.686	63.1223	65.029	69.1217	29.7107	23.898	52.9077	2.81642	3.37413	2.22891	0.310009	2.75245	3.93488	-4.50316	0	1	2884	1292									KOG1458	Fructose-1,6-bisphosphatase	Carbohydrate transport and metabolism	METABOLISM	_GAP_||PF00316
contig_15582_28_933_+	1871	0	0	0	0	0	0	0	0	0	1.8761	1.3146	0	0	0	0	0.72629	0.80313	1.9633	0	0	0	1.06357	0	1.16424	0	0	0	0.962913	0	0.693072	5.87414	1	0	1336	906	nth:Nther_1851	hypothetical protein						B2A606
contig_101445_29_280_+	1374	3.9537	3.9179	5.116	1.7613	1.6986	1.6204	1.1168	1.1027	2.0474	0.79465	1.5801	0.78178	0.96928	0.95395	1.8851	0	0	0	4.3292	1.69343	1.4223	1.05218	1.26944	0	0.681624	0.0705919	0.541398	0.45724	0.533229	0	0.718064	0.999998	0	443	252	hsa:11157 || pon:100436232 || mcc:703226 || mmu:78651 || rno:100366182 || rno:100360750 || rno:498934 || aml:100477883 || bta:615916 || oaa:100080021 || gga:422466 || mgp:100544905 || tgu:100190106 || xla:447141 || xtr:779701	LSM6, YDR378C; LSM6 homolog, U6 small nuclear R associated (S. cerevisiae); K12625 U6 snR-associated Sm-like protein LSm6 || u6 snR-associated Sm-like protein LSm6-like; K12625 U6 snR-associated Sm-like protein LSm6 || LSM6; LSM6 homolog, U6 small nuclear R associated (S. cerevisiae); K12625 U6 snR-associated Sm-like protein LSm6 || Lsm6, 1500031N17Rik, 2410088K19Rik, AI747288, MGC117708; LSM6 ho…							KOG1783	Small nuclear ribonucleoprotein F	R processing and modification	INFORMATION STORAGE AND PROCESSING	PF01423
contig_10307_1_1186_+	1374	3.9537	4.8973	4.0928	2.6419	4.2464	5.6713	1.1168	1.1027	0	2.384	1.5801	1.5636	1.9386	3.8158	1.8851	1.744	1.7735	1.7178	4.3146	4.18653	0.739833	1.84257	2.5465	1.7451	0.509403	1.51559	0.640753	0.468968	1.09957	0.0278663	-0.039468	0	0	1351	1186									KOG1911	Heterochromatin-associated protein HP1 and related CHROMO domain proteins	Chromatin structure and dymics	INFORMATION STORAGE AND PROCESSING	_GAP_||PF00385||_GAP_
contig_10488_34_1014_-	1374	2.9653	1.9589	2.0464	7.0451	5.0957	8.1019	8.9344	6.6161	6.1423	3.9733	5.5304	3.9089	1.9386	1.9079	1.8851	1.744	0	0	2.32353	6.74757	7.23093	4.47087	1.91053	0.581333	0.557506	1.52503	1.49415	0.918148	0.026847	1.0069	1.28688	1	0	1218	981	syp:SYNPCC7002_A0157	psbA-II; photosystem II D1 subunit PsbA-II (Qb protein); K02703 photosystem II P680 reaction center D1 protein	syp01100||syp00195	K02703	photosystem II P680 reaction center D1 protein	Photosynthesis		B1XM24					PF00124||_GAP_
contig_105464_52_694_-	1374	3.9537	3.9179	3.0696	5.2838	3.3971	3.2408	0	0	2.0474	0	0	0	0	0	0	0	0	0	3.64707	3.9739	0.682467	0	0	0	0.500421	1.1371	1.18207	0	0	0
contig_10654_1_1022_+	1374	1.9769	1.9589	2.0464	5.2838	7.6435	7.2917	4.4672	3.3081	3.0711	2.384	1.5801	2.3453	0.96928	2.8619	1.8851	0	0	0	1.99407	6.73967	3.61547	2.10313	1.90543	0	0.046207	1.27303	0.747081	0.453373	0.946474	0	-1.21746	0	1	1985	1022
contig_10654_1070_1822_+	1374	2.9653	2.9384	3.0696	7.0451	5.9449	4.8611	5.584	5.5134	4.0948	3.9733	3.1602	3.1271	1.9386	3.8158	2.8277	3.4881	1.7735	1.7178	2.9911	5.95037	5.06407	3.4202	2.8607	2.32647	0.0693007	1.09201	0.840151	0.479284	0.939035	1.00639	-0.397215	0	0.378097	1985	753	pti:PHATRDRAFT_48888	hypothetical protein						B7G8R0
contig_108258_349_978_-	1374	0.98843	0.97947	1.0232	3.5225	2.5478	1.6204	4.4672	4.4108	2.0474	4.7679	4.7404	4.6907	1.9386	1.9079	2.8277	0	0	0	0.997033	2.56357	3.6418	4.733	2.22473	0	0.0230996	0.951148	1.38108	0.0391284	0.52241	0	0.683463	1	0	1129	630									KOG0177	20S proteasome, regulatory subunit beta type PSMB2/PRE1	Posttranslatiol modification, protein turnover, chaperones	CELLULAR PROCESSES AND SIGLING	PF00227
contig_108401_215_940_-	1374	0	0	0	2.6419	2.5478	1.6204	4.4672	3.3081	2.0474	1.5893	1.5801	0.78178	0	0	0	0	0	0	0	2.27003	3.27423	1.31706	0	0	0	0.564563	1.21026	0.463589	0	0	0.414779	0.759062	0	2217	726													PF01380
contig_108408_1_1333_+	1374	0	0	0	1.7613	1.6986	1.6204	3.3504	4.4108	4.0948	3.1786	3.1602	2.3453	0.96928	1.9079	0	0	0	0	0	1.69343	3.952	2.8947	0.95906	0	0	0.0705919	0.544432	0.475883	0.953991	0	0.376046	0.00687795	0	1643	1333	ppp:PHYPADRAFT_188774	hypothetical protein						A9SV98	KOG0329	ATP-dependent R helicase	R processing and modification	INFORMATION STORAGE AND PROCESSING	_GAP_||PF00270||_GAP_||PF00271||_GAP_
contig_108415_1_821_+	1374	3.9537	3.9179	3.0696	4.4032	4.2464	5.6713	10.051	7.7188	7.166	5.5626	3.9503	7.036	6.785	6.6777	6.5979	0	0	0	3.64707	4.77363	8.31193	5.5163	6.68687	0	0.500421	0.781345	1.53123	1.54337	0.0938862	0	0.842446	1	0	1189	821									KOG0182	20S proteasome, regulatory subunit alpha type PSMA6/SCL1	Posttranslatiol modification, protein turnover, chaperones	CELLULAR PROCESSES AND SIGLING	PF10584||PF00227||_GAP_
contig_108416_1_2049_+	1374	4.9422	4.8973	4.0928	8.8064	5.0957	4.8611	4.4672	5.5134	6.1423	2.384	1.5801	3.1271	7.7543	6.6777	6.5979	5.2321	3.5469	5.1533	4.6441	6.2544	5.3743	2.36373	7.00997	4.6441	0.477967	2.21321	0.846169	0.773699	0.645845	0.95102	-0.927404	0	1	3002	2049	das:Daes_0014	hypothetical protein						E6VTV1
contig_108553_147_1020_-	1374	2.9653	0.97947	4.0928	1.7613	1.6986	1.6204	2.2336	3.3081	3.0711	2.384	1.5801	2.3453	2.9078	1.9079	2.8277	3.4881	3.5469	3.4355	2.67919	1.69343	2.87093	2.10313	2.5478	3.49017	1.57626	0.0705919	0.564524	0.453373	0.555615	0.0557287	-0.687911	0	1	1021	874
contig_108572_1108_1353_+	1374	3.9537	3.9179	5.116	4.4032	3.3971	4.051	1.1168	2.2054	1.0237	0.79465	0.79006	1.5636	0.96928	0.95395	0.94256	0	0	0	4.3292	3.95043	1.44863	1.04944	0.955263	0	0.681624	0.510534	0.65703	0.445284	0.0134083	0	-0.763358	0	1	1593	246	tet:TTHERM_00402180	Eukaryotic aspartyl protease family protein							KOG1339	Aspartyl protease	Posttranslatiol modification, protein turnover, chaperones	CELLULAR PROCESSES AND SIGLING	PF00026||_GAP_
contig_108585_1_1108_+	1374	0	0	0	1.7613	3.3971	4.8611	4.4672	4.4108	5.1185	0	0.79006	0	0	0	0	0	0	0	0	3.33983	4.6655	0.263353	0	0	0	1.55069	0.393322	0.456141	0	0	-3.1541	0	1	1350	1108	tps:THAPSDRAFT_270092	hypothetical protein						B8CFP9					_GAP_||PF00504||_GAP_
contig_108601_1078_1971_+	1374	7.9075	5.8768	4.0928	8.8064	11.041	8.1019	6.7008	4.4108	6.1423	6.3572	9.4807	5.4725	11.631	12.401	8.483	6.9762	3.5469	5.1533	5.95903	9.31643	5.7513	7.10347	10.8383	5.22547	1.90868	1.5345	1.19402	2.10573	2.07579	1.71579	0.399261	0.441802	0	2354	894													PF01593||_GAP_
contig_108601_119_1045_+	1374	5.9306	3.9179	4.0928	7.0451	5.0957	4.8611	5.584	5.5134	4.0948	4.7679	7.1106	5.4725	5.8157	5.7237	5.6553	1.744	1.7735	3.4355	4.6471	5.6673	5.06407	5.78367	5.73157	2.31767	1.11498	1.19896	0.840151	1.20195	0.0804888	0.968184	-0.480959	0	0.973239	2354	927									KOG0029	Amine oxidase	Secondary metabolites biosynthesis, transport and catabolism	METABOLISM	_GAP_||PF01593
contig_108724_1_641_+	1374	4.9422	3.9179	4.0928	3.5225	1.6986	4.051	6.7008	6.6161	6.1423	2.384	2.3702	2.3453	4.8464	4.7698	4.7128	1.744	1.7735	3.4355	4.31763	3.0907	6.4864	2.3665	4.77633	2.31767	0.547914	1.23421	0.300994	0.0196135	0.0670392	0.968184	-1.22359	0	1	641	641
contig_109039_158_910_-	1374	4.9422	2.9384	3.0696	4.4032	3.3971	4.051	6.7008	4.4108	4.0948	8.7412	7.9006	7.036	3.8771	3.8158	2.8277	0	0	0	3.65007	3.95043	5.0688	7.8926	3.50687	0	1.12094	0.510534	1.42216	0.852628	0.588974	0	0.63797	1	0	992	753									KOG1646	40S ribosomal protein S6	Translation, ribosomal structure and biogenesis	INFORMATION STORAGE AND PROCESSING	PF01092||_GAP_
contig_109046_1_1150_+	1374	6.919	7.8357	6.1392	6.1644	6.7942	6.4815	6.7008	7.7188	6.1423	3.9733	3.9503	4.6907	6.785	5.7237	6.5979	8.7202	8.8673	6.871	6.96463	6.48003	6.85397	4.20477	6.36887	8.15283	0.84917	0.314903	0.799333	0.420988	0.566508	1.11253	0.622259	1	0	1288	1150	tps:THAPSDRAFT_34125	hypothetical protein						B8C250					_GAP_||PF10563||_GAP_
contig_109265_356_1159_-	1374	0.98843	1.9589	2.0464	3.5225	3.3971	3.2408	8.9344	7.7188	7.166	3.1786	3.9503	3.1271	3.8771	3.8158	4.7128	0	0	0	1.66458	3.3868	7.93973	3.41867	4.13523	0	0.587192	0.141132	0.904665	0.461127	0.501126	0	0.563282	1	0	1160	804									KOG0179	20S proteasome, regulatory subunit beta type PSMB1/PRE7	Posttranslatiol modification, protein turnover, chaperones	CELLULAR PROCESSES AND SIGLING	_GAP_||PF00227
contig_109305_46_630_+	1374	1.9769	2.9384	2.0464	4.4032	5.9449	1.6204	2.2336	1.1027	1.0237	4.7679	4.7404	3.9089	0	0	0.94256	0	1.7735	1.7178	2.32057	3.9895	1.45333	4.4724	0.314187	1.16377	0.536187	2.19173	0.676884	0.488199	0.544187	1.00824	0.669952	1	0	927	585
contig_109488_74_1371_-	1374	3.9537	2.9384	3.0696	2.6419	1.6986	1.6204	2.2336	2.2054	3.0711	2.384	2.3702	2.3453	2.9078	1.9079	2.8277	1.744	3.5469	3.4355	3.32057	1.98697	2.50337	2.3665	2.5478	2.9088	0.55222	0.568535	0.491874	0.0196135	0.555615	1.01028	0.481711	0.885829	0	1447	1298	pti:PHATRDRAFT_47067	hypothetical protein						B7G2B9					PF02844||PF01071||_GAP_||PF02843
contig_109656_33_953_+	1374	0.98843	2.9384	1.0232	2.6419	2.5478	1.6204	7.8176	5.5134	6.1423	2.384	1.5801	1.5636	0	0	0	0	0	0	1.65001	2.27003	6.4911	1.84257	0	0	1.11591	0.564563	1.19104	0.468968	0	0	-1.0456	0	1	1169	921
contig_109790_147_998_-	1374	0	0.97947	1.0232	0	1.6986	3.2408	3.3504	4.4108	4.0948	3.1786	3.1602	1.5636	4.8464	3.8158	3.7702	1.744	5.3204	3.4355	0.667557	1.64647	3.952	2.63413	4.14413	3.49997	0.578534	1.62103	0.544432	0.927155	0.608608	1.78907	-0.0699586	0	0	1528	852	tps:THAPSDRAFT_bd1806	hypothetical protein						B8LE80					PF01041
contig_109868_298_555_-	1374	4.9422	2.9384	5.116	3.5225	5.0957	3.2408	5.584	4.4108	4.0948	3.1786	3.1602	3.9089	5.8157	6.6777	4.7128	1.744	1.7735	3.4355	4.3322	3.953	4.69653	3.4159	5.7354	2.31767	1.21019	0.999581	0.784641	0.42705	0.984908	0.968184	0.219254	0	0	723	258
contig_110069_1_525_+	1374	2.9653	1.9589	4.0928	2.6419	3.3971	2.4306	1.1168	1.1027	1.0237	0.79465	0	0.78178	0.96928	0.95395	0.94256	0	0	0	3.00567	2.8232	1.08107	0.525477	0.955263	0	1.06752	0.508117	0.0501787	0.455122	0.0134083	0	0.533136	0.994806	0	671	525
contig_110187_299_943_-	1374	1.9769	0.97947	1.0232	2.6419	5.0957	3.2408	0	0	0	3.1786	2.3702	3.1271	1.9386	2.8619	3.7702	1.744	1.7735	3.4355	1.32652	3.65947	0	2.89197	2.8569	2.31767	0.563667	1.27935	0	0.452596	0.91581	0.968184	0.264574	0.0780294	0	2009	645	pau:PA14_34600	gapB; putative glyceraldehyde-3-phosphate dehydrogese; K00131 glyceraldehyde-3-phosphate dehydrogese (DP) [EC:1.2.1.9]	pau00010||pau01100||pau01120	K00131	glyceraldehyde-3-phosphate dehydrogese (DP+) [EC:1.2.1.9]	Glycolysis / Gluconeogenesis || Pentose phosphate pathway || Carbon metabolism	1.2.1.9	Q02MC0					PF00171
contig_11179_1_698_+	1374	4.9422	5.8768	3.0696	4.4032	4.2464	4.8611	0	0	0	3.1786	3.1602	2.3453	0	1.9079	0.94256	1.744	1.7735	1.7178	4.62953	4.50357	0	2.8947	0.950153	1.7451	1.42948	0.319404	0	0.475883	0.953973	0.0278663	0.353611	0.0540977	0	1139	698	tps:THAPSDRAFT_18469	hypothetical protein						B8BZY5					PF01346||PF00254||_GAP_
contig_112063_1_2118_-	1374	0.98843	0.97947	1.0232	0.88064	0.84928	1.6204	4.4672	1.1027	1.0237	1.5893	1.5801	0.78178	3.8771	1.9079	1.8851	3.4881	3.5469	3.4355	0.997033	1.11677	2.19787	1.31706	2.5567	3.49017	0.0230996	0.436435	1.9657	0.463589	1.14356	0.0557287	-0.689225	0	0.999967	2202	2118	tps:THAPSDRAFT_264891	glucosylceramidase (EC:3.2.1.45); K01201 glucosylceramidase [EC:3.2.1.45]	tps01100||tps00511||tps00600	K01201	glucosylceramidase [EC:3.2.1.45]	Other glycan degradation || Sphingolipid metabolism || Lysosome	3.2.1.45	B8CG66	KOG2566	Beta-glucocerebrosidase	Carbohydrate transport and metabolism	METABOLISM	_GAP_||PF02055||_GAP_
contig_112113_7_1022_+	1374	1.9769	0.97947	0	0.88064	2.5478	0.81019	1.1168	1.1027	1.0237	3.1786	5.5304	3.1271	4.8464	3.8158	4.7128	5.2321	0	0	0.985457	1.41288	1.08107	3.94537	4.45833	1.74403	0.988464	0.983503	0.0501787	1.37292	0.560445	3.02075	-0.536331	0	0.774568	1023	1016	ota:Ot10g02210	betaine aldehyde dehydrogese, putative (ISS); K00130 betaine-aldehyde dehydrogese [EC:1.2.1.8]	ota00260	K00130	betaine-aldehyde dehydrogese [EC:1.2.1.8]	Glycine, serine and threonine metabolism	1.2.1.8	Q00ZV4	KOG2450	Aldehyde dehydrogese	Energy production and conversion	METABOLISM	PF00171
contig_112329_136_1178_+	1374	0	0	0	2.6419	2.5478	1.6204	4.4672	2.2054	4.0948	4.7679	3.1602	3.1271	4.8464	2.8619	3.7702	1.744	1.7735	1.7178	0	2.27003	3.58913	3.68507	3.82617	1.7451	0	0.564563	1.21273	0.937907	0.993433	0.0278663	0.167878	0.0236576	8.45e-07	1493	1043	ppp:PHYPADRAFT_169569	hypothetical protein; K00611 ornithine carbamoyltransferase [EC:2.1.3.3]	ppp01110||ppp00330||ppp01100	K00611	ornithine carbamoyltransferase [EC:2.1.3.3]	Arginine and proline metabolism || Biosynthesis of amino acids	2.1.3.3	A9TEA0	KOG1504	Ornithine carbamoyltransferase OTC/ARG3	Amino acid transport and metabolism	METABOLISM	_GAP_||PF02729||PF00185
contig_112424_48_905_+	1374	1.9769	4.8973	2.0464	5.2838	5.0957	3.2408	3.3504	5.5134	3.0711	4.7679	4.7404	3.1271	0.96928	0.95395	1.8851	0	0	0	2.97353	4.5401	3.9783	4.2118	1.26944	0	1.66639	1.12915	1.33675	0.939478	0.533229	0	0.0889299	2.92e-06	0	1067	858	isc:IscW_ISCW023289	esterase D, putative (EC:3.1.1.1); K01070 S-formylglutathione hydrolase [EC:3.1.2.12]		K01070	S-formylglutathione hydrolase [EC:3.1.2.12]	Methane metabolism || Carbon metabolism	3.1.2.12	B7QIS7	KOG3101	Esterase D	General function prediction only	POORLY CHARACTERIZED	PF00756
contig_115516_1_1002_+	1374	4.9422	4.8973	4.0928	3.5225	2.5478	4.051	7.8176	7.7188	9.2134	1.5893	2.3702	2.3453	5.8157	6.6777	3.7702	0	0	0	4.6441	3.37377	8.24993	2.1016	5.4212	0	0.477967	0.762557	0.835848	0.443839	1.49336	0	-1.36479	0	1	2008	1002
contig_115516_1374_2006_+	1374	5.9306	5.8768	7.1624	5.2838	5.0957	1.6204	0	0	0	1.5893	1.5801	3.1271	1.9386	0.95395	0.94256	0	0	0	6.32327	3.99997	0	2.09883	1.27837	0	0.727208	2.06291	0	0.890517	0.571804	0	-1.49313	0	1	2008	633
contig_115649_70_717_-	1374	12.85	13.713	11.255	12.329	11.89	12.153	2.2336	1.1027	3.0711	3.1786	3.1602	3.9089	0	0	0	0	0	0	12.606	12.124	2.1358	3.4159	0	0	1.24703	0.220932	0.987838	0.42705	0	0	0.842882	1	0	845	648	isc:IscW_ISCW015666	cellular nucleic acid binding protein, putative (EC:3.4.23.16)						B7P4I9	KOG4400	E3 ubiquitin ligase interacting with arginine methyltransferase	Posttranslatiol modification, protein turnover, chaperones	CELLULAR PROCESSES AND SIGLING	_GAP_||PF00098
contig_11610_1_506_+	1374	0	0	0	0	0	0	0	0	0	0	0	0	1.9386	3.8158	2.8277	3.4881	3.5469	3.4355	0	0	0	0	2.8607	3.49017	0	0	0	0	0.939035	0.0557287	1.03913	1	0	647	506
contig_116212_1_1238_-	1374	14.827	13.713	16.371	14.971	16.136	12.153	16.752	14.335	14.332	11.92	11.061	8.5996	15.509	15.263	14.138	12.208	10.641	13.742	14.9703	14.42	15.1397	10.5269	14.97	12.197	1.33478	2.04787	1.39632	1.72344	0.730956	1.55053	-1.14205	0	1	1239	1238	pti:PHATRDRAFT_34807	hypothetical protein						B7FWR2
contig_116355_106_567_+	1374	1.9769	0.97947	1.0232	5.2838	4.2464	4.051	7.8176	7.7188	8.1897	6.3572	5.5304	4.6907	3.8771	3.8158	3.7702	5.2321	5.3204	6.871	1.32652	4.52707	7.9087	5.5261	3.82103	5.80783	0.563667	0.662593	0.248317	0.833258	0.0536418	0.921787	0.362556	0.0659081	0	626	462	pti:PHATRDRAFT_40998	CaM2; calmodulin						B7GD06	KOG0027	Calmodulin and related proteins (EF-Hand superfamily)	Sigl transduction mechanisms	CELLULAR PROCESSES AND SIGLING	PF13833||_GAP_
contig_116507_199_612_-	1374	4.9422	6.8563	6.1392	2.6419	3.3971	3.2408	1.1168	1.1027	0	1.5893	0.79006	0.78178	0	0	0	0	0	0	5.97923	3.09327	0.739833	1.05371	0	0	0.967025	0.398631	0.640753	0.46385	0	0	-0.0013682	0	0	1123	414									KOG1735	Actin depolymerizing factor	Cytoskeleton	CELLULAR PROCESSES AND SIGLING	PF00241
contig_116851_56_1066_+	1374	1.9769	3.9179	4.0928	3.5225	5.0957	4.8611	1.1168	1.1027	2.0474	0	0.79006	0.78178	0.96928	1.9079	0.94256	0	0	0	3.3292	4.4931	1.4223	0.523947	1.27325	0	1.17439	0.848709	0.541398	0.45377	0.549788	0	-1.05511	0	1	1570	1011	vcn:VOLCADRAFT_81669	hypothetical protein; K08245 phytepsin [EC:3.4.23.40]							KOG1339	Aspartyl protease	Posttranslatiol modification, protein turnover, chaperones	CELLULAR PROCESSES AND SIGLING	_GAP_||PF00026
contig_116949_1_439_-	1374	1.9769	4.8973	2.0464	5.2838	4.2464	2.4306	1.1168	1.1027	2.0474	3.9733	3.1602	3.9089	0.96928	0.95395	0.94256	1.744	1.7735	1.7178	2.97353	3.98693	1.4223	3.6808	0.955263	1.7451	1.66639	1.44419	0.541398	0.452001	0.0134083	0.0278663	-1.12335	0	1	439	439
contig_117186_119_796_-	1374	3.9537	3.9179	2.0464	4.4032	5.9449	4.051	10.051	6.6161	9.2134	0.79465	0	2.3453	2.9078	1.9079	0.94256	0	0	0	3.306	4.7997	8.62683	1.04665	1.91942	0	1.09099	1.00729	1.791	1.19278	0.982671	0	-3.13262	0	1	796	678	pmi:PMT9312_0267	hypothetical protein						Q31CR7					_GAP_||PF07681||_GAP_
contig_117567_62_655_+	1374	5.9306	5.8768	6.1392	4.4032	4.2464	4.051	0	0	1.0237	0.79465	0	0	0	0	0.94256	0	0	0	5.9822	4.23353	0.341233	0.264883	0.314187	0	0.138601	0.176452	0.591033	0.458791	0.544187	0	0.711161	0.999999	0	866	594
contig_117812_88_771_+	1374	3.9537	4.8973	4.0928	4.4032	5.0957	4.051	0	0	0	3.1786	3.9503	3.1271	0	0	0	1.744	0	0	4.3146	4.51663	0	3.41867	0	0.581333	0.509403	0.531507	0	0.461127	0	1.0069	0.920846	1	0	998	684	hsa:3192	HNRNPU, HNRPU, SAF-A, U21.1, hnRNP_U; heterogeneous nuclear ribonucleoprotein U (scaffold attachment factor A); K12888 heterogeneous nuclear ribonucleoprotein U							KOG2242	Scaffold/matrix specific factor hnRNP-U/SAF-A, contains SPRY domain	R processing and modification	INFORMATION STORAGE AND PROCESSING	PF02037||_GAP_
contig_11855_65_781_+	1374	4.9422	6.8563	5.116	5.2838	5.9449	5.6713	5.584	4.4108	6.1423	6.3572	7.9006	7.036	8.7235	8.5856	7.5404	8.7202	12.414	10.307	5.63817	5.63333	5.37903	7.09793	8.28317	10.4804	1.05851	0.332181	0.88376	0.773562	0.64694	1.85299	0.576772	0.999998	0	969	717	pti:PHATRDRAFT_34120	hypothetical protein						B7FUS9					PF01081
contig_118773_1_433_+	1374	5.9306	5.8768	5.116	4.4032	5.0957	4.051	1.1168	1.1027	1.0237	3.9733	3.9503	4.6907	0.96928	1.9079	0.94256	1.744	0	0	5.64113	4.51663	1.08107	4.20477	1.27325	0.581333	0.455574	0.531507	0.0501787	0.420988	0.549788	1.0069	1.1324	1	0	485	433	cyn:Cyan7425_1303	rplX; 50S ribosomal protein L24; K02895 large subunit ribosomal protein L24	cyn03010	K02895	large subunit ribosomal protein L24	Ribosome		B8HMR5					_GAP_||PF00467||_GAP_
contig_121055_316_858_-	1374	5.9306	7.8357	7.1624	6.1644	5.9449	8.1019	5.584	3.3081	3.0711	10.33	11.061	9.3814	5.8157	5.7237	6.5979	5.2321	5.3204	6.871	6.97623	6.73707	3.98773	10.2575	6.04577	5.80783	0.966098	1.18706	1.38748	0.842146	0.480369	0.921787	0.775714	1	0	942	543
contig_121605_1_989_+	1374	2.9653	2.9384	4.0928	0	0.84928	0	1.1168	0	1.0237	1.5893	3.1602	1.5636	1.9386	1.9079	1.8851	6.9762	5.3204	5.1533	3.33217	0.283093	0.7135	2.10437	1.91053	5.81663	0.658865	0.490332	0.61966	0.914469	0.026847	1.00768	-0.0119858	0	0	1250	989	syn:slr1665	dapF; diaminopimelate epimerase (EC:5.1.1.7); K01778 diaminopimelate epimerase [EC:5.1.1.7]	syn01100||syn01110||syn01120||syn00300	K01778	diaminopimelate epimerase [EC:5.1.1.7]	Lysine biosynthesis || Biosynthesis of amino acids	5.1.1.7	P74667					_GAP_||PF01678
contig_124086_1_467_-	1374	0	0	0	0	0	0	0	0	0	2.384	2.3702	2.3453	4.8464	4.7698	4.7128	8.7202	10.641	6.871	0	0	0	2.3665	4.77633	8.74407	0	0	0	0.0196135	0.0670392	1.88511	-0.354187	0.00807759	0.442196	467	467
contig_127593_87_796_+	1374	1.9769	2.9384	2.0464	0.88064	2.5478	1.6204	2.2336	2.2054	2.0474	1.5893	1.5801	0.78178	1.9386	3.8158	3.7702	1.744	1.7735	1.7178	2.32057	1.68295	2.16213	1.31706	3.17487	1.7451	0.536187	0.835338	0.100357	0.463589	1.07088	0.0278663	-0.406643	0	0.505733	796	710
contig_127982_77_946_-	1374	0	0	0	3.5225	1.6986	2.4306	3.3504	5.5134	6.1423	2.384	1.5801	0.78178	2.9078	1.9079	1.8851	0	0	0	0	2.55057	5.00203	1.58196	2.2336	0	0	0.917849	1.46451	0.801112	0.583986	0	0.471476	0.802999	0	1313	870	olu:OSTLU_17852 || olu:OSTLU_19257	hypothetical protein; K01933 phosphoribosylformylglycimidine cyclo-ligase [EC:6.3.3.1] || hypothetical protein	olu01110||olu00230||olu01100	K01933	phosphoribosylformylglycimidine cyclo-ligase [EC:6.3.3.1]	Purine metabolism	6.3.3.1	A4S6J7					_GAP_||PF02769
contig_132760_3073_4002_+	1374	10.873	8.8152	7.1624	14.971	15.287	16.204	8.9344	8.8215	9.2134	3.1786	3.9503	4.6907	2.9078	1.9079	2.8277	0	0	0	8.9502	15.4873	8.98977	3.93987	2.5478	0	1.85898	0.640447	0.201731	0.756104	0.555615	0	-4.94442	0	1	6846	930
contig_132762_660_1960_-	1374	0	0	0	0	0	0	0	1.1027	0	0	0	0	2.9078	2.8619	4.7128	1.744	1.7735	0	0	0	0.367567	0	3.49417	1.1725	0	0	0.636644	0	1.05562	1.01552	-0.697252	0	1	2874	1301
contig_132764_1107_1388_+	1374	7.9075	6.8563	5.116	8.8064	8.4928	8.1019	10.051	9.9242	10.237	0	0	0	0	0	0	0	0	0	6.6266	8.46703	10.0707	0	0	0	1.40985	0.352956	0.157331	0	0	0	-5.19015	0	1	3865	282
contig_132764_1977_3071_+	1374	25.699	22.528	25.58	31.703	33.122	34.838	31.27	27.567	29.688	3.9733	2.3702	3.9089	2.9078	3.8158	3.7702	1.744	7.0938	3.4355	24.6023	33.221	29.5083	3.41747	3.49793	4.0911	1.79741	1.56984	1.85803	0.907531	0.511579	2.73449	-5.37468	0	1	3865	1095
contig_132764_76_1104_+	1374	15.815	15.671	17.394	17.613	17.835	17.824	17.869	16.54	18.427	0	0	0	0	0	0	0	0	0	16.2933	17.7573	17.612	0	0	0	0.955921	0.125117	0.969396	0	0	0	-5.76572	0	1	3865	1029	scl:sce2648	PE-PGRS family protein						A9GA28
contig_132776_89_3074_+	1374	0	0	0	1.7613	0.84928	2.4306	8.9344	8.8215	7.166	4.7679	6.3205	8.5996	14.539	15.263	13.196	1.744	1.7735	3.4355	0	1.68039	8.3073	6.56267	14.3327	2.31767	0	0.793759	0.990005	1.92729	1.04883	0.968184	0.401515	0.400678	0	3292	2986	pti:PHATRDRAFT_48245	hypothetical protein						B7G6H1
contig_132790_1_1018_+	1374	0	0	0	0	0	0	1.1168	3.3081	2.0474	1.5893	2.3702	3.1271	2.9078	4.7698	4.7128	5.2321	3.5469	5.1533	0	0	2.15743	2.3622	4.13013	4.6441	0	0	1.09979	0.768931	1.05896	0.95102	0.358187	0.0038445	0	1772	1018	pti:PHATR_46842	hypothetical protein						B5Y3Y2					_GAP_||PF13519||_GAP_
contig_132794_1072_3247_+	1374	8.8959	11.754	9.2088	13.21	10.191	10.532	12.285	9.9242	13.308	3.9733	3.9503	3.9089	2.9078	0.95395	0.94256	0	0	0	9.9529	11.311	11.8391	3.94417	1.60144	0	1.56762	1.6534	1.73542	0.0326352	1.13136	0	-0.819801	0	1	3563	2176													PF02028||PF04749||_GAP_
contig_132794_83_1045_+	1374	6.919	7.8357	6.1392	8.8064	7.6435	8.1019	6.7008	6.6161	5.1185	2.384	2.3702	2.3453	3.8771	3.8158	3.7702	0	0	0	6.96463	8.18393	6.14513	2.3665	3.82103	0	0.84917	0.585774	0.890099	0.0196135	0.0536418	0	-1.43211	0	1	3563	963													_GAP_||PF02028||_GAP_
contig_132809_1_1960_-	1374	2.9653	0.97947	3.0696	3.5225	2.5478	4.8611	2.2336	1.1027	0	0	0	0	0	0	0	0	0	0	2.33812	3.6438	1.1121	0	0	0	1.17778	1.16141	1.11683	0	0	0	-1.33733	0	1	2298	1960	fra:Francci3_0638	hypothetical protein						Q2JFC0
contig_132866_165_2757_-	1374	3.9537	3.9179	2.0464	1.7613	1.6986	0	11.168	12.13	11.261	0.79465	0	0.78178	4.8464	4.7698	1.8851	0	0	0	3.306	1.1533	11.5197	0.525477	3.83377	0	1.09099	0.999279	0.530606	0.455122	1.68803	0	-0.781113	0	1	2759	2593
contig_132992_201_974_-	1374	2.9653	3.9179	4.0928	1.7613	2.5478	1.6204	1.1168	0	1.0237	0.79465	0.79006	0.78178	0	0.95395	0	0	0	0	3.65867	1.9765	0.7135	0.78883	0.317983	0	0.606808	0.499751	0.61966	0.00652257	0.550763	0	0.363194	0.135424	0	1281	774	ppp:PHYPADRAFT_108284	hypothetical protein; K14016 ubiquitin fusion degradation protein 1	ppp04141	K14016	ubiquitin fusion degradation protein 1	Protein processing in endoplasmic reticulum		A9TJK2	KOG1816	Ubiquitin fusion-degradation protein	Posttranslatiol modification, protein turnover, chaperones	CELLULAR PROCESSES AND SIGLING	PF03152||_GAP_
contig_132992_989_1280_-	1374	3.9537	2.9384	4.0928	1.7613	2.5478	1.6204	3.3504	2.2054	2.0474	0.79465	1.5801	0.78178	1.9386	1.9079	1.8851	0	1.7735	1.7178	3.66163	1.9765	2.5344	1.05218	1.91053	1.16377	0.630188	0.499751	0.711079	0.45724	0.026847	1.00824	0.136433	0.000159742	0	1281	292									KOG1816	Ubiquitin fusion-degradation protein	Posttranslatiol modification, protein turnover, chaperones	CELLULAR PROCESSES AND SIGLING	_GAP_||PF03152
contig_133028_2017_2631_+	1374	0	0	0	0	0	0	1.1168	2.2054	0	0	0	0	2.9078	4.7698	3.7702	0	1.7735	0	0	0	1.1074	0	3.81593	0.591167	0	0	1.10273	0	0.931842	1.02393	0.232193	0.000183292	0	2668	615									KOG4001	Axonemal dynein light chain	Cytoskeleton	CELLULAR PROCESSES AND SIGLING	PF10211
contig_133390_1_1045_-	1374	4.9422	5.8768	4.0928	3.5225	2.5478	3.2408	6.7008	6.6161	7.166	2.384	2.3702	2.3453	8.7235	7.6316	8.483	5.2321	5.3204	6.871	4.9706	3.1037	6.82763	2.3665	8.27937	5.80783	0.892339	0.501605	0.296079	0.0196135	0.573726	0.921787	-1.61188	0	1	1046	1045	tps:THAPS_23419	hypothetical protein						B5YMN9
contig_133393_84_1498_+	1374	2.9653	3.9179	3.0696	0	0	0	0	0	0	0.79465	0	0.78178	0.96928	0	0	0	0	0	3.3176	0	0	0.525477	0.323093	0	0.522484	0	0	0.455122	0.559614	0	0.102436	0	0	2468	1415	vcn:VOLCADRAFT_95450	hypothetical protein; K00297 methylenetetrahydrofolate reductase (DPH) [EC:1.5.1.20]							KOG0564	5,10-methylenetetrahydrofolate reductase	Amino acid transport and metabolism	METABOLISM	PF00334||PF02219
contig_133400_42_1049_+	1374	3.9537	2.9384	5.116	2.6419	1.6986	3.2408	0	0	0	0.79465	0.79006	1.5636	0	0	0	0	0	0	4.0027	2.5271	0	1.04944	0	0	1.08963	0.777483	0	0.445284	0	0	-1.36952	0	1	1061	1008
contig_133426_1_1635_+	1374	10.873	10.774	10.232	8.8064	11.041	9.7223	10.051	7.7188	10.237	7.1519	8.6907	7.036	7.7543	7.6316	10.368	1.744	1.7735	1.7178	10.6263	9.85657	9.3356	7.6262	8.58463	1.7451	0.345071	1.12333	1.40327	0.923704	1.54566	0.0278663	-0.71212	0	1	4152	1635	tps:THAPS_23419	hypothetical protein						B5YMN9
contig_133681_48_914_+	1374	4.9422	3.9179	3.0696	2.6419	2.5478	3.2408	0	0	0	0.79465	0.79006	0.78178	0.96928	0	0.94256	0	0	0	3.97657	2.81017	0	0.78883	0.63728	0	0.937677	0.375896	0	0.00652257	0.552062	0	0.919168	1	0	1135	867									KOG0123	Polyadenylate-binding protein (RRM superfamily)	R processing and modification	INFORMATION STORAGE AND PROCESSING	PF00076||_GAP_
contig_133810_63_932_+	1374	19.769	18.61	17.394	15.851	16.986	21.065	12.285	15.438	11.261	15.893	18.171	17.981	14.539	11.447	11.311	26.161	26.602	25.766	18.591	17.9673	12.9947	17.3483	12.4323	26.1763	1.18761	2.74203	2.17705	1.26393	1.82569	0.418211	0.795699	1	0	1021	870	pti:PHATRDRAFT_50214	hypothetical protein						B7GDC2
contig_133812_1_1389_+	1374	0.98843	1.9589	1.0232	1.7613	2.5478	2.4306	4.4672	3.3081	2.0474	0.79465	0.79006	0.78178	2.9078	2.8619	1.8851	0	0	0	1.32351	2.24657	3.27423	0.78883	2.5516	0	0.550538	0.424319	1.21026	0.00652257	0.577662	0	-0.143908	0	0	2344	1389
contig_134027_1326_2009_+	1374	4.9422	5.8768	4.0928	1.7613	1.6986	1.6204	4.4672	5.5134	5.1185	2.384	4.7404	3.9089	6.785	4.7698	5.6553	3.4881	1.7735	1.7178	4.9706	1.69343	5.03303	3.67777	5.7367	2.32647	0.892339	0.0705919	0.528311	1.19508	1.01006	1.00639	-0.349004	0	0.055468	3476	684
contig_134108_106_1503_+	1374	1.9769	1.9589	2.0464	1.7613	2.5478	0	2.2336	2.2054	2.0474	1.5893	0	0	3.8771	4.7698	2.8277	0	0	0	1.99407	1.43637	2.16213	0.529767	3.82487	0	0.046207	1.30461	0.100357	0.917583	0.972103	0	0.141979	2.52e-05	0	1887	1398	ppp:PHYPADRAFT_148216	hypothetical protein						A9TNP2	KOG0439	VAMP-associated protein involved in inositol metabolism	Intracellular trafficking, secretion, and vesicular transport	CELLULAR PROCESSES AND SIGLING	PF00635||_GAP_
contig_134345_342_787_-	1374	5.9306	5.8768	6.1392	3.5225	3.3971	2.4306	6.7008	7.7188	8.1897	7.1519	6.3205	6.2542	5.8157	5.7237	5.6553	6.9762	8.8673	6.871	5.9822	3.11673	7.53643	6.57553	5.73157	7.5715	0.138601	0.597508	0.761018	0.500248	0.0804888	1.12343	0.0213789	0	0	787	446									KOG0908	Thioredoxin-like protein	Posttranslatiol modification, protein turnover, chaperones	CELLULAR PROCESSES AND SIGLING	PF00240||PF00085
contig_135207_1_847_+	1374	3.9537	4.8973	5.116	0	0.84928	0	0	0	0	0.79465	0	0	0	0	0	0	0	0	4.65567	0.283093	0	0.264883	0	0	0.617677	0.490332	0	0.458791	0	0	-1.19628	2.61e-14	0.999933	847	847
contig_135487_1_768_+	1374	0.98843	0.97947	1.0232	0.88064	0.84928	0.81019	1.1168	1.1027	1.0237	1.5893	1.5801	0.78178	4.8464	2.8619	3.7702	3.4881	5.3204	5.1533	0.997033	0.846703	1.08107	1.31706	3.82617	4.65393	0.0230996	0.0352956	0.0501787	0.463589	0.993433	1.01309	0.798213	1	0	918	768	tps:THAPS_6672	hypothetical protein						B5YP66
contig_135595_80_1218_+	1374	0	0	0	0	0	0	0	0	0	1.5893	1.5801	1.5636	1.9386	0.95395	0.94256	5.2321	1.7735	3.4355	0	0	0	1.57767	1.27837	3.48037	0	0	0	0.0130216	0.571804	1.72974	-0.420418	0	0.570364	1463	1139	ddi:DDB_G0289327	sevA; hypothetical protein						P10733	KOG0443	Actin regulatory proteins (gelsolin/villin family)	Cytoskeleton	CELLULAR PROCESSES AND SIGLING	_GAP_||PF00626
contig_135693_1_890_-	1374	0	0.97947	0	0.88064	0.84928	0	0	0	0	0	0	0	1.9386	3.8158	3.7702	3.4881	1.7735	3.4355	0.32649	0.57664	0	0	3.17487	2.89903	0.565497	0.499631	0	0	1.07088	0.975095	-1.31199	0	1	1162	890
contig_135705_143_673_-	1374	2.9653	3.9179	3.0696	6.1644	5.9449	3.2408	2.2336	5.5134	5.1185	7.1519	3.9503	6.2542	0	0	0	0	0	0	3.3176	5.1167	4.2885	5.78547	0	0	0.522484	1.62828	1.79052	1.65147	0	0	0.596651	1	0	767	531									KOG0027	Calmodulin and related proteins (EF-Hand superfamily)	Sigl transduction mechanisms	CELLULAR PROCESSES AND SIGLING	_GAP_||PF13499||_GAP_
contig_135818_1_1014_+	1374	16.803	14.692	16.371	18.493	20.383	19.445	0	14.335	0	0	2.3702	0	0	0	0	0	7.0938	3.4355	15.9553	19.4403	4.77833	0.790067	0	3.50977	1.1152	0.945009	8.27632	1.36844	0	3.54748	-2.89203	0	1	1389	1014
contig_135851_1_471_+	1374	7.9075	8.8152	11.255	6.1644	6.7942	6.4815	8.9344	8.8215	8.1897	8.7412	7.9006	8.5996	8.7235	7.6316	9.4256	13.952	12.414	12.024	9.3259	6.48003	8.64853	8.4138	8.59357	12.7967	1.7312	0.314903	0.401351	0.450048	0.90403	1.01937	1.07505	1	0	810	471	ppp:PHYPADRAFT_175904	hypothetical protein; K02943 large subunit ribosomal protein LP2	ppp03010	K02943	large subunit ribosomal protein LP2	Ribosome		A9RKJ0	KOG3449	60S acidic ribosomal protein P2	Translation, ribosomal structure and biogenesis	INFORMATION STORAGE AND PROCESSING	_GAP_||PF00428
contig_136504_631_2037_-	1374	0.98843	0.97947	1.0232	1.7613	1.6986	1.6204	1.1168	1.1027	1.0237	0	0	0	1.9386	1.9079	0.94256	5.2321	5.3204	5.1533	0.997033	1.69343	1.08107	0	1.59635	5.23527	0.0230996	0.0705919	0.0501787	0	0.56641	0.083595	-5.40992	0	1	2274	1407													_GAP_||PF13385||_GAP_
contig_136520_1089_1955_+	1374	4.9422	5.8768	5.116	3.5225	5.9449	3.2408	3.3504	6.6161	3.0711	0	0	0.78178	0.96928	0.95395	0	0	0	0	5.31167	4.23607	4.34587	0.260593	0.641077	0	0.497075	1.48658	1.97103	0.451361	0.555242	0	-0.570006	0	1	2425	867	rpc:RPC_0863	hypothetical protein						Q21B03					_GAP_||PF03407||_GAP_
contig_136548_994_1838_-	1374	4.9422	6.8563	7.1624	7.9257	5.0957	6.4815	8.9344	9.9242	10.237	6.3572	7.9006	6.2542	4.8464	3.8158	3.7702	10.464	8.8673	8.5888	6.3203	6.50097	9.69853	6.83733	4.14413	9.3067	1.20324	1.4151	0.67999	0.922255	0.608608	1.01188	-0.734245	0	1	1839	845									KOG1350	F0F1-type ATP synthase, beta subunit	Energy production and conversion	METABOLISM	_GAP_||PF02874||_GAP_||PF00006
contig_136566_1_583_+	1374	1.9769	2.9384	5.116	3.5225	2.5478	4.051	0	1.1027	1.0237	1.5893	1.5801	1.5636	0.96928	0.95395	0	0	0	0	3.34377	3.37377	0.7088	1.57767	0.641077	0	1.60833	0.762557	0.615108	0.0130216	0.555242	0	0.717064	1	0	791	583
contig_136600_1_1003_+	1374	7.9075	10.774	9.2088	2.6419	2.5478	2.4306	5.584	4.4108	4.0948	3.1786	1.5801	3.1271	0.96928	1.9079	0.94256	1.744	3.5469	5.1533	9.29677	2.5401	4.69653	2.6286	1.27325	3.4814	1.43527	0.10586	0.784641	0.908393	0.549788	1.70559	0.25363	0.000554489	0	1004	1003	olu:OSTLU_17148	hypothetical protein						A4S415
contig_136609_1118_3027_+	1374	1.9769	3.9179	2.0464	4.4032	3.3971	2.4306	2.2336	2.2054	3.0711	1.5893	0	0.78178	0.96928	2.8619	3.7702	0	0	1.7178	2.64707	3.4103	2.50337	0.79036	2.53379	0.5726	1.10112	0.986366	0.491874	0.794685	1.429	0.991772	-1.34301	0	1	3997	1910	scb:SCAB_5761	hypothetical protein						C9YVM5
contig_137178_1172_2005_+	1374	4.9422	6.8563	5.116	3.5225	3.3971	2.4306	7.8176	5.5134	4.0948	1.5893	1.5801	3.1271	7.7543	6.6777	6.5979	5.2321	5.3204	5.1533	5.63817	3.11673	5.8086	2.09883	7.00997	5.23527	1.05851	0.597508	1.87887	0.890517	0.645845	0.083595	-2.01609	0	1	6931	834
contig_137178_2008_3012_+	1374	9.8843	9.7947	8.1856	10.568	8.4928	8.9121	12.285	13.232	13.308	6.3572	6.3205	6.2542	15.509	16.217	17.909	15.696	12.414	12.024	9.2882	9.3243	12.9417	6.31063	16.545	13.378	0.95593	1.09729	0.569958	0.0522041	1.23316	2.0169	-1.92874	0	1	6931	1005
contig_137178_3030_5047_+	1374	5.9306	6.8563	7.1624	5.2838	7.6435	6.4815	1.1168	1.1027	1.0237	2.384	0.79006	2.3453	6.785	4.7698	5.6553	1.744	0	0	6.64977	6.4696	1.08107	1.83979	5.7367	0.581333	0.641346	1.1799	0.0501787	0.909296	1.01006	1.0069	-2.05126	0	1	6931	2018													_GAP_||PF00530||_GAP_
contig_137178_5053_6925_+	1374	5.9306	6.8563	7.1624	4.4032	5.9449	7.2917	4.4672	4.4108	5.1185	3.1786	3.9503	3.1271	7.7543	6.6777	8.483	3.4881	7.0938	5.1533	6.64977	5.87993	4.6655	3.41867	7.63833	5.24507	0.641346	1.44535	0.393322	0.461127	0.90822	1.8046	-1.55372	0	1	6931	1873
contig_137182_850_1734_-	1374	0.98843	1.9589	1.0232	3.5225	2.5478	4.8611	1.1168	3.3081	3.0711	2.384	2.3702	2.3453	3.8771	2.8619	3.7702	3.4881	5.3204	1.7178	1.32351	3.6438	2.49867	2.3665	3.50307	3.50877	0.550538	1.16141	1.20258	0.0196135	0.557833	1.80139	0.457591	0.993089	0	1798	885	syn:sll1744	rplA; 50S ribosomal protein L1; K02863 large subunit ribosomal protein L1	syn03010	K02863	large subunit ribosomal protein L1	Ribosome		P36236					_GAP_||PF00687||_GAP_
contig_137329_64_1176_+	1374	0	0	0	0	0	0.81019	0	0	0	0	0	0	4.8464	3.8158	3.7702	3.4881	3.5469	1.7178	0	0.270063	0	0	4.14413	2.9176	0	0.467763	0	0	0.608608	1.03947	-1.65369	0	1	1266	1113
contig_137846_3621_3983_-	1374	0.98843	0.97947	2.0464	4.4032	4.2464	4.8611	4.4672	4.4108	7.166	10.33	11.061	11.727	11.631	11.447	13.196	1.744	0	1.7178	1.3381	4.50357	5.348	11.0393	12.0913	1.15393	0.613422	0.319404	1.57469	0.698752	0.961083	0.999421	0.812511	1	0	4449	363	olu:OSTLU_30488	RPL7; Ribosomal protein L7, component of cytosolic 80S ribosome and 60S large subunit; K02937 large subunit ribosomal protein L7e	olu03010	K02937	large subunit ribosomal protein L7e	Ribosome		A4RU41	KOG3184	60S ribosomal protein L7	Translation, ribosomal structure and biogenesis	INFORMATION STORAGE AND PROCESSING
contig_13908_399_992_-	1374	5.9306	3.9179	6.1392	3.5225	4.2464	4.051	1.1168	1.1027	1.0237	3.1786	3.9503	3.9089	1.9386	0.95395	2.8277	1.744	0	1.7178	5.32923	3.93997	1.08107	3.67927	1.90675	1.15393	1.22669	0.374505	0.0501787	0.434084	0.937281	0.999421	1.1653	1	0	1081	594
contig_139489_421_1519_+	1374	18.78	16.651	17.394	14.971	14.438	15.394	0	0	0	7.9465	11.061	8.5996	7.7543	7.6316	5.6553	0	0	3.4355	17.6083	14.9343	0	9.20237	7.01373	1.14517	1.08056	0.479054	0	1.64241	1.17804	1.98349	-0.790739	0	1	1520	1099
contig_140076_66_583_+	1374	0	0	0	0	0.84928	0.81019	5.584	4.4108	5.1185	0.79465	1.5801	0	0	0	0	0	0	0	0	0.553157	5.03777	0.791583	0	0	0	0.479446	0.590752	0.790054	0	0	-0.665673	0	1	583	518									KOG0101	Molecular chaperones HSP70/HSC70, HSP70 superfamily	Posttranslatiol modification, protein turnover, chaperones	CELLULAR PROCESSES AND SIGLING	PF00012
contig_140296_1_721_-	1374	3.9537	3.9179	4.0928	4.4032	3.3971	4.051	5.584	5.5134	4.0948	0	0	0	0	0	0	0	0	0	3.98813	3.95043	5.06407	0	0	0	0.0923945	0.510534	0.840151	0	0	0	-4.37919	0	1	804	721
contig_140411_326_803_-	1374	4.9422	4.8973	5.116	2.6419	4.2464	6.4815	2.2336	2.2054	1.0237	3.9733	2.3702	3.1271	0	0	0	1.744	0	0	4.98517	4.4566	1.8209	3.15687	0	0.581333	0.115508	1.92841	0.690539	0.801964	0	1.0069	0.406683	0.498299	0	803	478	nve:NEMVE_v1g240544	hypothetical protein						A7RTD9					_GAP_||PF00439||_GAP_
contig_141190_1_950_-	1374	10.873	8.8152	9.2088	7.9257	7.6435	9.7223	13.402	15.438	12.285	6.3572	5.5304	6.2542	13.57	10.493	10.368	10.464	10.641	10.307	9.63233	8.4305	13.7083	6.04727	11.477	10.4707	1.09232	1.12759	1.59867	0.450573	1.81367	0.1671	-1.58193	0	1	950	950
contig_141820_103_334_+	1374	8.8959	7.8357	9.2088	7.9257	5.9449	8.1019	6.7008	6.6161	7.166	3.9733	2.3702	3.9089	1.9386	1.9079	1.8851	3.4881	3.5469	5.1533	8.6468	7.32417	6.82763	3.41747	1.91053	4.06277	0.719645	1.19772	0.296079	0.907531	0.026847	0.944887	-0.315585	0	0.00191978	334	232
contig_142162_1_1038_+	1374	0.98843	0.97947	1.0232	0.88064	1.6986	1.6204	2.2336	1.1027	0	3.9733	2.3702	3.9089	2.9078	1.9079	1.8851	1.744	1.7735	1.7178	0.997033	1.39988	1.1121	3.41747	2.2336	1.7451	0.0230996	0.451372	1.11683	0.907531	0.583986	0.0278663	-0.266674	0	0.0955114	1679	1038													PF03935||_GAP_
contig_142316_167_598_-	1374	0.98843	0.97947	1.0232	2.6419	1.6986	1.6204	3.3504	4.4108	2.0474	0.79465	0.79006	0.78178	0.96928	0.95395	0.94256	1.744	1.7735	1.7178	0.997033	1.98697	3.26953	0.78883	0.955263	1.7451	0.0230996	0.568535	1.18377	0.00652257	0.0134083	0.0278663	0.334992	0.103804	0	680	432													PF13499||PF02197||_GAP_
contig_143402_116_697_-	1374	0.98843	1.9589	2.0464	3.5225	2.5478	3.2408	8.9344	11.027	7.166	5.5626	5.5304	3.9089	5.8157	5.7237	4.7128	1.744	0	0	1.66458	3.1037	9.04247	5.00063	5.4174	0.581333	0.587192	0.501605	1.93277	0.945606	0.611933	1.0069	0.808665	1	0	1058	582	cre:CHLREDRAFT_179706	RPS7; ribosomal protein S7, component of cytosolic 80S ribosome and 40S small subunit; K02993 small subunit ribosomal protein S7e	cre03010	K02993	small subunit ribosomal protein S7e	Ribosome		A8JGI9	KOG3320	40S ribosomal protein S7	Translation, ribosomal structure and biogenesis	INFORMATION STORAGE AND PROCESSING	PF01251
contig_143420_541_711_+	1374	2.9653	3.9179	3.0696	1.7613	2.5478	2.4306	3.3504	3.3081	4.0948	3.1786	3.1602	3.1271	2.9078	2.8619	2.8277	5.2321	5.3204	5.1533	3.3176	2.24657	3.58443	3.1553	2.8658	5.23527	0.522484	0.424319	0.442496	0.0260973	0.0401922	0.083595	1.00902	1	0	1132	171	kla:KLLA0F20383g	hypothetical protein; K02979 small subunit ribosomal protein S28e	kla03010	K02979	small subunit ribosomal protein S28e	Ribosome		P33285	KOG3502	40S ribosomal protein S28	Translation, ribosomal structure and biogenesis	INFORMATION STORAGE AND PROCESSING	PF01200
contig_143438_1_795_+	1374	5.9306	2.9384	5.116	4.4032	3.3971	3.2408	4.4672	6.6161	8.1897	6.3572	6.3205	6.2542	6.785	5.7237	6.5979	1.744	3.5469	1.7178	4.66167	3.68037	6.42433	6.31063	6.36887	2.33623	1.54697	0.630851	1.86864	0.0522041	0.566508	1.04855	0.704622	1	0	980	795									KOG0183	20S proteasome, regulatory subunit alpha type PSMA7/PRE6	Posttranslatiol modification, protein turnover, chaperones	CELLULAR PROCESSES AND SIGLING	PF10584||PF00227||_GAP_
contig_143488_1052_1930_+	1374	3.9537	3.9179	4.0928	2.6419	4.2464	4.8611	4.4672	4.4108	4.0948	0	1.5801	2.3453	0.96928	0.95395	0.94256	0	0	0	3.98813	3.91647	4.32427	1.30847	0.955263	0	0.0923945	1.1458	0.200715	1.19601	0.0134083	0	-1.5201	0	1	2268	879	ppp:PHYPADRAFT_154919	hypothetical protein						E1C9W6
contig_143488_33_1040_+	1374	6.919	8.8152	7.1624	3.5225	4.2464	2.4306	5.584	5.5134	9.2134	0	0	0	0	1.9079	0.94256	1.744	0	1.7178	7.6322	3.39983	6.77027	0	0.950153	1.15393	1.03171	0.914094	2.11611	0	0.953973	0.999421	-1.94038	0	1	2268	1008	ppp:PHYPADRAFT_187046	NRT2;1; nitrate transporter						E1C9Z2					_GAP_||PF07690
contig_143539_53_928_+	1374	1.9769	0.97947	1.0232	0.88064	0.84928	0.81019	2.2336	2.2054	1.0237	2.384	1.5801	1.5636	4.8464	3.8158	4.7128	6.9762	7.0938	5.1533	1.32652	0.846703	1.8209	1.84257	4.45833	6.40777	0.563667	0.0352956	0.690539	0.468968	0.560445	1.08799	0.429274	0.694575	0	1166	876	pti:PHATRDRAFT_45813	hypothetical protein						B7FYR9					_GAP_||PF04755||_GAP_
contig_143606_88_1574_+	1374	1.9769	1.9589	2.0464	2.6419	1.6986	1.6204	0	0	0	7.1519	6.3205	6.2542	7.7543	8.5856	7.5404	0	0	0	1.99407	1.98697	0	6.57553	7.9601	0	0.046207	0.568535	0	0.500248	0.552156	0	0.666765	1	0	1851	1487	spo:SPCC1223.14	chorismate synthase (predicted) (EC:4.2.3.5); K01736 chorismate synthase [EC:4.2.3.5]	spo00400||spo01100||spo01110	K01736	chorismate synthase [EC:4.2.3.5]	Phenylalanine, tyrosine and tryptophan biosynthesis || Biosynthesis of amino acids	4.2.3.5	O74413	KOG4492	Chorismate synthase	Amino acid transport and metabolism	METABOLISM	PF01264||_GAP_
contig_144194_58_1008_+	1374	8.8959	7.8357	7.1624	8.8064	7.6435	11.343	8.9344	7.7188	9.2134	11.92	10.271	11.727	8.7235	8.5856	11.311	8.7202	10.641	8.5888	7.96467	9.2643	8.6222	11.306	9.54003	9.31667	0.873916	1.89178	0.794707	0.901516	1.53525	1.14879	-0.242726	0	0	1388	951	pti:PHATRDRAFT_23717	hypothetical protein; K02641 ferredoxin--DP+ reductase [EC:1.18.1.2]	pti01100||pti00195	K02641	ferredoxin--DP+ reductase [EC:1.18.1.2]	Photosynthesis	1.18.1.2	B7GCT8					_GAP_||PF00175
contig_145909_186_528_-	1374	4.9422	3.9179	7.1624	5.2838	5.0957	4.8611	3.3504	3.3081	3.0711	0.79465	2.3702	1.5636	1.9386	1.9079	0.94256	0	1.7735	1.7178	5.34083	5.0802	3.2432	1.57615	1.59635	1.16377	1.65858	0.211776	0.150536	0.78785	0.56641	1.00824	1.17531	1	0	528	343									KOG1767	40S ribosomal protein S25	Translation, ribosomal structure and biogenesis	INFORMATION STORAGE AND PROCESSING	PF03297
contig_147420_1_410_-	1374	4.9422	4.8973	5.116	4.4032	5.0957	4.051	5.584	5.5134	4.0948	1.5893	1.5801	2.3453	3.8771	3.8158	3.7702	1.744	3.5469	1.7178	4.98517	4.51663	5.06407	1.83823	3.82103	2.33623	0.115508	0.531507	0.840151	0.439157	0.0536418	1.04855	-0.978352	0	1	491	410
contig_147516_1_1104_+	1374	0.98843	1.9589	2.0464	0.88064	0	1.6204	3.3504	2.2054	2.0474	0.79465	1.5801	0.78178	3.8771	1.9079	4.7128	0	0	0	1.66458	0.83368	2.5344	1.05218	3.49927	0	0.587192	0.81122	0.711079	0.45724	1.44012	0	-0.0197327	0	0	1331	1104	olu:OSTLU_24461	hypothetical protein						A4RWK7	KOG1557	Fructose-biphosphate aldolase	Carbohydrate transport and metabolism	METABOLISM	PF00274
contig_148394_94_978_+	1374	0	0	0	0	0.84928	0.81019	2.2336	1.1027	2.0474	4.7679	5.5304	5.4725	0	0.95395	1.8851	0	0	0	0	0.553157	1.79457	5.25693	0.94635	0	0	0.479446	0.606364	0.424504	0.942573	0	0.545297	1	0	1209	885	tps:THAPSDRAFT_270092	hypothetical protein						B8CFP9					_GAP_||PF00504||_GAP_
contig_148401_558_2007_-	1374	4.9422	2.9384	4.0928	5.2838	4.2464	4.051	3.3504	3.3081	3.0711	4.7679	3.1602	2.3453	3.8771	3.8158	3.7702	5.2321	3.5469	5.1533	3.99113	4.52707	3.2432	3.42447	3.82103	4.6441	1.00576	0.662593	0.150536	1.23273	0.0536418	0.95102	-0.595699	0	1	2009	1450
contig_148427_1_1690_+	1374	18.78	21.548	20.464	30.822	28.875	26.736	15.635	17.643	17.403	0	0.79006	0.78178	0	0	0	0	0	0	20.264	28.811	16.8937	0.523947	0	0	1.3948	2.04375	1.09662	0.45377	0	0	-5.62643	0	1	2063	1690
contig_148661_1_2362_+	1374	6.919	4.8973	6.1392	8.8064	7.6435	6.4815	3.3504	5.5134	7.166	7.1519	5.5304	7.036	7.7543	7.6316	9.4256	8.7202	7.0938	6.871	5.98517	7.6438	5.34327	6.57277	8.2705	7.56167	1.01961	1.16245	1.91348	0.904574	1.00223	1.00948	-1.74528	0	1	2364	2362
contig_148753_1_559_-	1374	2.9653	0.97947	2.0464	2.6419	3.3971	3.2408	4.4672	4.4108	4.0948	1.5893	1.5801	1.5636	4.8464	3.8158	3.7702	3.4881	1.7735	3.4355	1.99706	3.09327	4.32427	1.57767	4.14413	2.89903	0.993834	0.398631	0.200715	0.0130216	0.608608	0.975095	-1.24011	0	1	559	559	tps:THAPS_23419	hypothetical protein						B5YMN9
contig_149067_137_655_+	1374	0.98843	1.9589	1.0232	3.5225	2.5478	4.051	0	0	0	3.1786	2.3702	3.9089	0	0	0	0	0	0	1.32351	3.37377	0	3.15257	0	0	0.550538	0.762557	0	0.76968	0	0	0.8209	1	0	1247	519
contig_149101_151_459_-	1374	0	0	0	0.88064	0.84928	1.6204	2.2336	4.4108	5.1185	0.79465	0.79006	0.78178	0.96928	0.95395	0	0	0	0	0	1.11677	3.92097	0.78883	0.641077	0	0	0.436435	1.50353	0.00652257	0.555242	0	0.862715	1	0	556	309													PF13499||_GAP_
contig_149299_1_1003_+	1374	2.9653	0.97947	1.0232	2.6419	2.5478	2.4306	0	2.2054	1.0237	3.1786	2.3702	1.5636	2.9078	2.8619	3.7702	0	0	0	1.65599	2.5401	1.07637	2.3708	3.17997	0	1.13411	0.10586	1.10364	0.8075	0.511672	0	-0.28634	0	0.112789	1242	1003	olu:OSTLU_26020	hypothetical protein						A4S3D7	KOG2182	Hydrolytic enzymes of the alpha/beta hydrolase fold	Posttranslatiol modification, protein turnover, chaperones	CELLULAR PROCESSES AND SIGLING	_GAP_||PF05577
contig_152101_100_488_+	1374	0	0.97947	1.0232	2.6419	1.6986	4.8611	1.1168	2.2054	2.0474	2.384	2.3702	1.5636	3.8771	3.8158	2.8277	1.744	3.5469	3.4355	0.667557	3.0672	1.78987	2.10593	3.50687	2.9088	0.578534	1.62358	0.588222	0.469725	0.588974	1.01028
contig_152370_1_282_+	1374	0	0	0	0	0	0	0	0	1.0237	0	0.79006	0.78178	3.8771	6.6777	4.7128	3.4881	3.5469	5.1533	0	0	0.341233	0.523947	5.0892	4.06277	0	0	0.591033	0.45377	1.43774	0.944887
contig_152666_178_972_-	1374	2.9653	2.9384	4.0928	2.6419	2.5478	0.81019	0	0	1.0237	0	0	0	0	0	0	0	0	0	3.33217	1.99996	0.341233	0	0	0	0.658865	1.03145	0.591033	0	0	0	-0.0850099	0	0	1065	795	vcn:VOLCADRAFT_87337	hypothetical protein											PF05050||_GAP_
contig_153191_1_848_+	1374	0	0	0	0	0	0	0	0	0	0	0	0	0	0	0	5.2321	5.3204	0	0	0	0	0	0	3.5175	0	0	0	0	0	3.04656	2.91501	1	4.69e-22	1180	848
contig_155877_1_1020_-	1374	0	0	0	0	0	0	3.3504	4.4108	4.0948	4.7679	5.5304	6.2542	4.8464	3.8158	2.8277	5.2321	7.0938	5.1533	0	0	3.952	5.5175	3.82997	5.8264	0	0	0.544432	0.743234	1.00942	1.09831	-0.166006	0	0	2476	1020	tps:THAPSDRAFT_11411	CSN1; precursor of synthase (EC:2.3.3.1); K01647 citrate synthase [EC:2.3.3.1]	tps01100||tps01110||tps00020||tps00630	K01647	citrate synthase [EC:2.3.3.1]	Citrate cycle (TCA cycle) || Glyoxylate and dicarboxylate metabolism || Carbon metabolism || 2-Oxocarboxylic acid metabolism || Biosynthesis of amino acids	2.3.3.1	B8CEG2	KOG2617	Citrate synthase	Energy production and conversion	METABOLISM	_GAP_||PF00285
contig_155961_1_2546_+	1374	2.9653	1.9589	3.0696	3.5225	2.5478	2.4306	1.1168	1.1027	1.0237	3.9733	5.5304	5.4725	2.9078	2.8619	2.8277	0	0	0	2.6646	2.83363	1.08107	4.99207	2.8658	0	0.613375	0.599447	0.0501787	0.882753	0.0401922	0	-0.148531	0	0	3812	2546	tad:TRIADDRAFT_29352	hypothetical protein						B3S5C5	KOG0443	Actin regulatory proteins (gelsolin/villin family)	Cytoskeleton	CELLULAR PROCESSES AND SIGLING	_GAP_||PF00626||_GAP_||PF02209
contig_155987_502_771_+	1374	4.9422	5.8768	4.0928	7.0451	5.9449	6.4815	3.3504	4.4108	4.0948	3.9733	4.7404	5.4725	3.8771	2.8619	3.7702	3.4881	3.5469	3.4355	4.9706	6.4905	3.952	4.72873	3.50307	3.49017	0.892339	0.550155	0.544432	0.749668	0.557833	0.0557287
contig_155989_972_1823_-	1374	1.9769	0.97947	1.0232	1.7613	1.6986	1.6204	0	2.2054	2.0474	3.9733	4.7404	5.4725	1.9386	2.8619	2.8277	0	1.7735	1.7178	1.32652	1.69343	1.4176	4.72873	2.54273	1.16377	0.563667	0.0705919	1.23022	0.749668	0.523474	1.00824	-0.336072	0	0.127914	1946	852	ppp:PHYPADRAFT_207743	ALDH12A; mitochondrial P5CDH; K00294 1-pyrroline-5-carboxylate dehydrogese [EC:1.5.1.12]	ppp00250||ppp00330||ppp01100	K00294	1-pyrroline-5-carboxylate dehydrogese [EC:1.2.1.88]	Alanine, aspartate and glutamate metabolism || Arginine and proline metabolism	1.5.1.12	A9S190					_GAP_||PF00171
contig_156262_112_3004_+	1374	0.98843	0.97947	1.0232	0.88064	0.84928	1.6204	6.7008	5.5134	4.0948	0.79465	0	0	6.785	6.6777	6.5979	0	0	0	0.997033	1.11677	5.43633	0.264883	6.68687	0	0.0230996	0.436435	1.30471	0.458791	0.0938862	0	-0.675743	0	1	6240	2893
contig_156346_1_1089_+	1374	0.98843	0.97947	1.0232	1.7613	1.6986	1.6204	4.4672	4.4108	4.0948	6.3572	7.9006	5.4725	2.9078	1.9079	1.8851	1.744	1.7735	3.4355	0.997033	1.69343	4.32427	6.57677	2.2336	2.31767	0.0230996	0.0705919	0.200715	1.22885	0.583986	0.968184	0.256259	0.000265313	0	1128	1089	tps:THAPSDRAFT_25544	PGP; phosphoglycolate phosphatase; K01101 4-nitrophenyl phosphatase [EC:3.1.3.41]		K01101	4-nitrophenyl phosphatase [EC:3.1.3.41]	Aminobenzoate degradation	3.1.3.41	B8LDT0	KOG2882	p-Nitrophenyl phosphatase	Inorganic ion transport and metabolism	METABOLISM	_GAP_||PF00702||PF13344||_GAP_||PF13242
contig_156554_216_941_-	1374	11.861	13.713	11.255	11.448	11.041	14.583	7.8176	8.8215	9.2134	9.5358	10.271	10.163	7.7543	7.6316	7.5404	10.464	12.414	10.307	12.2763	12.3573	8.6175	9.98993	7.6421	11.0617	1.28055	1.9382	0.719914	0.396981	0.107336	1.17378	-0.174355	0	3.14e-05	975	726	tps:THAPSDRAFT_1418	hypothetical protein						B8BQW4					_GAP_||PF00160
contig_156808_74_934_-	1374	0	0	0	0.88064	0	0.81019	4.4672	3.3081	3.0711	0.79465	0	0.78178	0	0	0	0	0	0	0	0.56361	3.61547	0.525477	0	0	0	0.48937	0.747081	0.455122	0	0	-0.341861	0	0.204322	1130	861	cyb:CYB_1972	hypothetical protein; K08994 putative membrane protein		K08994	putative membrane protein			Q2JK74					PF01062
contig_156889_126_914_-	1374	0.98843	0	0	0	0.84928	0.81019	2.2336	1.1027	2.0474	1.5893	0.79006	0.78178	3.8771	2.8619	2.8277	8.7202	7.0938	6.871	0.329477	0.553157	1.79457	1.05371	3.1889	7.56167	0.57067	0.479446	0.606364	0.46385	0.596244	1.00948	-0.564085	0	0.9752	1621	789
contig_157006_1_1059_+	1374	0	0	0	0	0	0	0	0	0	4.7679	4.7404	6.2542	2.9078	4.7698	1.8851	6.9762	1.7735	3.4355	0	0	0	5.25417	3.18757	4.06173	0	0	0	0.866163	1.46256	2.65728	-0.00377379	0.000436358	0.000659672	1521	1059
contig_157043_1_585_+	1374	7.9075	6.8563	6.1392	6.1644	6.7942	7.2917	2.2336	2.2054	3.0711	4.7679	4.7404	4.6907	2.9078	3.8158	3.7702	5.2321	5.3204	5.1533	6.96767	6.7501	2.50337	4.733	3.49793	5.23527	0.889395	0.564942	0.491874	0.0391284	0.511579	0.083595	0.000352714	0	0	813	585	tps:THAPSDRAFT_1418	hypothetical protein						B8BQW4					PF00160
contig_157064_1_1948_-	1374	0.98843	0	1.0232	0.88064	0	0.81019	2.2336	3.3081	3.0711	0	0.79006	0.78178	5.8157	1.9079	2.8277	0	0	0	0.670543	0.56361	2.87093	0.523947	3.5171	0	0.580968	0.48937	0.564524	0.45377	2.04308	0	-1.29266	0	1	4128	1948	nve:NEMVE_v1g198568	hypothetical protein						A7RKU3					PF02010||_GAP_
contig_157336_219_908_-	1374	0	0.97947	1.0232	1.7613	0.84928	0	2.2336	0	2.0474	2.384	3.1602	2.3453	0.96928	2.8619	2.8277	1.744	5.3204	3.4355	0.667557	0.870193	1.427	2.62983	2.21963	3.49997	0.578534	0.880836	1.23932	0.459718	1.08297	1.78907	0.59331	0.98819	0	1249	690	tps:THAPSDRAFT_11970	hypothetical protein						B8CG33					_GAP_||PF13460||_GAP_
contig_157357_1087_1632_+	1374	24.711	24.487	23.534	22.897	26.328	25.926	29.037	28.67	24.569	22.25	22.912	25.799	11.631	12.401	11.311	26.161	26.602	25.766	24.244	25.0503	27.4253	23.6537	11.781	26.1763	0.624995	1.87564	2.48045	1.88717	0.560268	0.418211	0.721097	1	0	1779	546	pop:POPTR_644880 || pop:POPTR_671531 || pop:POPTR_664306 || rcu:RCOM_1345500 || rcu:RCOM_1345530 || vvi:100242458 || vvi:100267487 || vvi:100242677	ARF family protein; K07977 Arf/Sar family, other || ARF family protein || ARF family protein || ADP-ribosylation factor, arf, putative; K07977 Arf/Sar family, other || ADP-ribosylation factor, arf, putative || similar to ADP-ribosylation factor; K07977 Arf/Sar family, other || similar to ADP-ribosylation factor || similar to ADP-ribosylation factor							KOG0070	GTP-binding ADP-ribosylation factor Arf1	Intracellular trafficking, secretion, and vesicular transport	CELLULAR PROCESSES AND SIGLING	PF00025
contig_157394_972_1502_-	1374	8.8959	8.8152	8.1856	7.9257	8.4928	6.4815	6.7008	5.5134	4.0948	5.5626	6.3205	7.036	3.8771	3.8158	2.8277	3.4881	5.3204	1.7178	8.63223	7.63333	5.43633	6.30637	3.50687	3.50877	0.388895	1.03703	1.30471	0.736802	0.588974	1.80139	-0.0884315	0	0	1896	531									KOG4203	Armadillo/beta-Catenin/plakoglobin	Sigl transduction mechanisms	CELLULAR PROCESSES AND SIGLING	_GAP_||PF00485
contig_157450_1_453_+	1374	5.9306	7.8357	5.116	5.2838	5.9449	5.6713	3.3504	1.1027	1.0237	3.1786	3.1602	3.1271	1.9386	1.9079	1.8851	1.744	1.7735	3.4355	6.2941	5.63333	1.8256	3.1553	1.91053	2.31767	1.39581	0.332181	1.32111	0.0260973	0.026847	0.968184	0.339548	0.0491296	0	704	453
contig_157563_1575_4220_-	1374	0	0	0	2.6419	1.6986	1.6204	5.584	3.3081	2.0474	0.79465	1.5801	0	0	0	0	0	0	0	0	1.98697	3.6465	0.791583	0	0	0	0.568535	1.79242	0.790054	0	0	-0.0369404	0	0	4389	2646	nve:NEMVE_v1g240852	hypothetical protein ; K08776 puromycin-sensitive aminopeptidase [EC:3.4.11.-]		K08776	puromycin-sensitive aminopeptidase [EC:3.4.11.-]			A7RUV9	KOG1046	Puromycin-sensitive aminopeptidase and related aminopeptidases	Amino acid transport and metabolism	METABOLISM	PF01433||_GAP_||PF11838
contig_157679_279_938_-	1374	0	0	0	0	0	0	0	0	0	0.79465	1.5801	0.78178	3.8771	2.8619	3.7702	1.744	0	1.7178	0	0	0	1.05218	3.50307	1.15393	0	0	0	0.45724	0.557833	0.999421	0.219233	0.0770116	8.57e-07	1350	660	tps:THAPSDRAFT_268480	GGPS1; geranylgeranyl pyrophosphate synthetase (EC:2.5.1.29); K13789 geranylgeranyl diphosphate synthase, type II [EC:2.5.1.1 2.5.1.10 2.5.1.29]	tps01100||tps00900||tps01110	K13789	geranylgeranyl diphosphate synthase, type II [EC:2.5.1.1 2.5.1.10 2.5.1.29]	Terpenoid backbone biosynthesis	2.5.1.29||2.5.1.10||2.5.1.1	B8BXV9					PF00348
contig_157730_1_1586_+	1374	0	0	0	0	0.84928	0.81019	4.4672	4.4108	2.0474	0.79465	1.5801	2.3453	0	0	0	0	0	0	0	0.553157	3.6418	1.57335	0	0	0	0.479446	1.38108	0.775347	0	0	-0.102188	0	0.00120815	1876	1586	pti:PHATRDRAFT_49936	hypothetical protein						B7GCD2	KOG2563	Permease of the major facilitator superfamily	General function prediction only	POORLY CHARACTERIZED	_GAP_||PF07690||_GAP_
contig_158207_1_584_+	1374	2.9653	3.9179	1.0232	2.6419	4.2464	0.81019	3.3504	3.3081	4.0948	0	1.5801	0.78178	0.96928	0	1.8851	0	0	0	2.63547	2.56616	3.58443	0.787293	0.95146	0	1.47527	1.71936	0.442496	0.790064	0.942676	0	0.209884	0.0302926	0	898	584	bug:BC1001_4784	hypothetical protein; K09958 hypothetical protein		K09958	hypothetical protein								_GAP_||PF07080
contig_158263_34_1044_+	1374	3.9537	2.9384	3.0696	4.4032	1.6986	3.2408	2.2336	3.3081	2.0474	2.384	2.3702	1.5636	4.8464	3.8158	3.7702	0	3.5469	1.7178	3.32057	3.1142	2.5297	2.10593	4.14413	1.7549	0.55222	1.35674	0.680513	0.469725	0.608608	1.77374	-0.779636	0	1	4032	1011
contig_158342_1137_1505_+	1374	8.8959	9.7947	10.232	10.568	10.191	8.9121	8.9344	6.6161	7.166	8.7412	9.4807	6.2542	7.7543	7.6316	7.5404	13.952	12.414	12.024	9.64087	9.89037	7.57217	8.1587	7.6421	12.7967	0.681204	0.867921	1.21135	1.69028	0.107336	1.01937	0.75779	1	0	1665	369	tps:THAPSDRAFT_10234	hypothetical protein; K10960 geranylgeranyl reductase [EC:1.3.1.83]	tps01100||tps00900||tps01110||tps00860	K10960	geranylgeranyl reductase [EC:1.3.1.83]	Porphyrin and chlorophyll metabolism || Terpenoid backbone biosynthesis	1.3.1.83	B8CDB3
contig_158343_923_1579_+	1374	3.9537	2.9384	3.0696	3.5225	3.3971	4.051	11.168	9.9242	7.166	6.3572	7.9006	7.8178	5.8157	4.7698	5.6553	0	0	0	3.32057	3.65687	9.4194	7.35853	5.4136	0	0.55222	0.34704	2.0482	0.868168	0.563286	0	0.695134	1	0	2243	657									KOG0175	20S proteasome, regulatory subunit beta type PSMB5/PSMB8/PRE2	Posttranslatiol modification, protein turnover, chaperones	CELLULAR PROCESSES AND SIGLING	PF00227
contig_158374_2091_2351_+	1374	3.9537	3.9179	3.0696	3.5225	3.3971	3.2408	4.4672	5.5134	2.0474	2.384	2.3702	2.3453	0.96928	3.8158	2.8277	0	0	1.7178	3.64707	3.3868	4.00933	2.3665	2.53759	0.5726	0.500421	0.141132	1.77779	0.0196135	1.44526	0.991772	1.00844	1	0	2563	261
contig_158505_1945_3968_-	1374	4.9422	4.8973	6.1392	0	0.84928	0.81019	0	0	0	0	0	0	1.9386	0.95395	1.8851	0	0	0	5.32623	0.553157	0	0	1.59255	0	0.704408	0.479446	0	0	0.55369	0	-1.71391	0	1	4251	2024													PF13517||_GAP_
contig_158511_1_1008_+	1374	6.919	7.8357	9.2088	5.2838	4.2464	4.8611	13.402	12.13	9.2134	23.84	22.122	24.235	12.601	13.355	12.253	26.161	24.828	25.766	7.98783	4.7971	11.5818	23.399	12.7363	25.585	1.15246	0.521653	2.14744	1.12341	0.563327	0.684685	-0.904435	0	1	4586	1008									KOG1353	F0F1-type ATP synthase, alpha subunit	Energy production and conversion	METABOLISM	_GAP_||PF02874||_GAP_||PF00006
contig_158579_2936_4932_-	1374	0	0	0	3.5225	5.9449	5.6713	1.1168	2.2054	0	6.3572	6.3205	6.2542	0	0	0	0	0	0	0	5.04623	1.1074	6.31063	0	0	0	1.32666	1.10273	0.0522041	0	0	-1.18075	0	1	6054	1997	tet:TTHERM_00823910	C2 domain containing protein							KOG1326	Membrane-associated protein FER-1 and related ferlins, contain multiple C2 domains	Cell wall/membrane/envelope biogenesis	CELLULAR PROCESSES AND SIGLING	PF08151||PF00168||_GAP_
contig_158579_844_2885_-	1374	0	0	0	11.448	11.041	8.1019	3.3504	5.5134	7.166	9.5358	8.6907	9.3814	0	0	0	0	0	0	0	10.197	5.34327	9.20263	0	0	0	1.82576	1.91348	0.450018	0	0	-0.0157329	0	0	6054	2042									KOG1326	Membrane-associated protein FER-1 and related ferlins, contain multiple C2 domains	Cell wall/membrane/envelope biogenesis	CELLULAR PROCESSES AND SIGLING	PF00168||_GAP_
contig_158629_202_987_-	1374	2.9653	3.9179	3.0696	0	0	0	2.2336	2.2054	3.0711	1.5893	2.3702	0.78178	0	1.9079	0.94256	3.4881	5.3204	3.4355	3.3176	0	2.50337	1.58043	0.950153	4.08133	0.522484	0	0.491874	0.794247	0.953973	1.07339	-0.074074	0	0	1721	786	tps:THAPSDRAFT_270141	KAS3; 3-oxoacyl-synthase (EC:2.3.1.41); K00648 3-oxoacyl-[acyl-carrier-protein] synthase III [EC:2.3.1.180]	tps01100||tps00061	K00648	3-oxoacyl-[acyl-carrier-protein] synthase III [EC:2.3.1.180]	Fatty acid biosynthesis || Fatty acid metabolism	2.3.1.180	B8CGL6					_GAP_||PF08545||_GAP_||PF08541
contig_158666_328_897_-	1374	2.9653	3.9179	4.0928	3.5225	5.0957	4.051	1.1168	0	2.0474	1.5893	3.1602	3.9089	2.9078	2.8619	1.8851	1.744	3.5469	3.4355	3.65867	4.22307	1.05473	2.88613	2.5516	2.9088	0.606808	0.80059	1.02511	1.18384	0.577662	1.01028	0.61043	0.999977	0	2370	570	tps:THAPSDRAFT_225	hypothetical protein						B8BSB1					PF01765
contig_158679_221_1800_-	1374	2.9653	3.9179	3.0696	2.6419	4.2464	3.2408	1.1168	1.1027	1.0237	1.5893	1.5801	0.78178	0.96928	0.95395	0.94256	0	0	0	3.3176	3.37637	1.08107	1.31706	0.955263	0	0.522484	0.810795	0.0501787	0.463589	0.0134083	0	-0.067955	0	0	1902	1580													PF13499||PF13405||_GAP_||PF00036||_GAP_||PF13202||PF13405
contig_158710_106_918_+	1374	5.9306	6.8563	8.1856	7.0451	5.0957	7.2917	6.7008	6.6161	8.1897	7.9465	7.1106	7.8178	5.8157	3.8158	5.6553	0	0	1.7178	6.99083	6.4775	7.16887	7.62497	5.0956	0.5726	1.1335	1.20301	0.885081	0.450079	1.11124	0.991772	0.757704	1	0	2604	813									KOG0176	20S proteasome, regulatory subunit alpha type PSMA5/PUP2	Posttranslatiol modification, protein turnover, chaperones	CELLULAR PROCESSES AND SIGLING	PF10584||PF00227||_GAP_
contig_158845_982_1458_+	1374	2.9653	3.9179	2.0464	1.7613	2.5478	1.6204	4.4672	4.4108	3.0711	3.9733	3.1602	2.3453	2.9078	1.9079	2.8277	3.4881	1.7735	3.4355	2.97653	1.9765	3.98303	3.1596	2.5478	2.89903	0.935801	0.499751	0.790261	0.814	0.555615	0.975095	0.53955	0.940294	0	1645	477	rpc:RPC_3823	hypothetical protein						Q20ZS9					PF03928
contig_158912_270_2038_-	1374	0	0	0	0	0	0	0	0	0	7.1519	7.9006	6.2542	2.9078	4.7698	3.7702	0	0	0	0	0	0	7.10223	3.81593	0	0	0	0	0.824323	0.931842	0	-0.455799	0	1	2040	1769													_GAP_||PF01293||_GAP_
contig_158918_1038_1337_+	1374	3.9537	3.9179	5.116	4.4032	2.5478	3.2408	0	0	0	1.5893	1.5801	2.3453	0	0	0	0	0	0	4.3292	3.39727	0	1.83823	0	0	0.681624	0.937544	0	0.439157	0	0	0.332036	0.0252134	0	1518	300
contig_158918_127_1011_+	1374	9.8843	7.8357	8.1856	7.9257	8.4928	12.153	1.1168	2.2054	2.0474	2.384	1.5801	2.3453	2.9078	2.8619	3.7702	0	1.7735	0	8.6352	9.52383	1.78987	2.10313	3.17997	0.591167	1.09581	2.29451	0.588222	0.453373	0.511672	1.02393	-0.0791903	0	0	1518	885	tps:THAPSDRAFT_4710	hypothetical protein						B8C028					PF13499||_GAP_
contig_158953_74_1087_+	1374	4.9422	4.8973	4.0928	12.329	11.89	6.4815	13.402	12.13	12.285	7.9465	13.431	7.036	5.8157	6.6777	7.5404	1.744	0	0	4.6441	10.2335	12.6057	9.47117	6.67793	0.581333	0.477967	3.25673	0.693986	3.4594	0.86235	1.0069	0.17999	0	0	1700	1014	fri:FraEuI1c_1720	argininosuccite synthase (EC:6.3.4.5); K01940 argininosuccite synthase [EC:6.3.4.5]	fri00250||fri01100||fri00330||fri01110	K01940	argininosuccite synthase [EC:6.3.4.5]	Alanine, aspartate and glutamate metabolism || Arginine and proline metabolism || Biosynthesis of amino acids	6.3.4.5	E3JA75					PF00764
contig_159012_220_933_-	1374	34.595	34.281	37.858	30.822	28.875	34.028	22.336	19.848	22.522	21.456	22.912	21.108	19.386	17.171	19.794	34.881	35.469	37.791	35.578	31.2417	21.5687	21.8253	18.7837	36.047	1.98077	2.60201	1.49304	0.957032	1.41143	1.5387	-1.13304	0	1	967	714	vcn:VOLCADRAFT_72905	hypothetical protein; K02638 plastocyanin											_GAP_||PF00127
contig_159068_129_1070_+	1374	8.8959	7.8357	6.1392	10.568	7.6435	10.532	4.4672	4.4108	5.1185	6.3572	3.9503	4.6907	3.8771	2.8619	0.94256	1.744	1.7735	3.4355	7.6236	9.58117	4.6655	4.9994	2.56052	2.31767	1.39054	1.67817	0.393322	1.23279	1.4903	0.968184	0.206948	0	0	1258	942									KOG0028	Ca2+-binding protein (centrin/caltractin), EF-Hand superfamily protein	Cytoskeleton	CELLULAR PROCESSES AND SIGLING	PF13499||PF13833||PF00036||_GAP_
contig_159148_277_1035_+	1374	5.9306	4.8973	5.116	4.4032	5.0957	4.8611	1.1168	0	0	2.384	1.5801	2.3453	0	0	0	0	0	0	5.31463	4.78667	0.372267	2.10313	0	0	0.544535	0.352199	0.644785	0.453373	0	0	-1.43025	0	1	3941	759	pti:PHATRDRAFT_43420	hypothetical protein						B7FS65
contig_159155_292_1419_-	1374	0	0.97947	0	0	0	0.81019	1.1168	1.1027	0	0	1.5801	1.5636	2.9078	2.8619	3.7702	0	1.7735	0	0.32649	0.270063	0.739833	1.0479	3.17997	0.591167	0.565497	0.467763	0.640753	0.907546	0.511672	1.02393	0.555146	0.940325	0	1420	1128	tps:THAPSDRAFT_7607	methyltransferase						B8C702					_GAP_||PF13847||_GAP_
contig_159631_380_856_-	1374	0.98843	0.97947	0	0.88064	0.84928	0	2.2336	3.3081	3.0711	4.7679	4.7404	3.9089	2.9078	2.8619	2.8277	5.2321	1.7735	1.7178	0.655967	0.57664	2.87093	4.4724	2.8658	2.9078	0.568101	0.499631	0.564524	0.488199	0.0401922	2.0131	0.286018	0.0587155	0	1794	477	nve:NEMVE_v1g229384	hypothetical protein ; K01805 xylose isomerase [EC:5.3.1.5]	nve00051||nve01100||nve00040	K01805	xylose isomerase [EC:5.3.1.5]	Pentose and glucurote interconversions || Fructose and mannose metabolism	5.3.1.5	A7S4Q7
contig_159631_925_1793_-	1374	2.9653	2.9384	3.0696	0.88064	3.3971	0.81019	10.051	8.8215	9.2134	7.1519	7.1106	6.2542	5.8157	7.6316	10.368	8.7202	10.641	10.307	2.9911	1.69598	9.36197	6.8389	7.93843	9.8894	0.0693007	1.47364	0.62807	0.506786	2.29161	1.02624	0.0519859	0	0	1794	869													_GAP_||PF01261
contig_159870_2236_3170_+	1374	3.9537	4.8973	4.0928	6.1644	4.2464	4.8611	5.584	4.4108	5.1185	6.3572	5.5304	7.8178	4.8464	4.7698	4.7128	8.7202	8.8673	8.5888	4.3146	5.09063	5.03777	6.56847	4.77633	8.72543	0.509403	0.979385	0.590752	1.15824	0.0670392	0.139324	0.601755	1	0	3774	935									KOG0534	DH-cytochrome b-5 reductase	Coenzyme transport and metabolism	METABOLISM	_GAP_||PF00970||PF00175||_GAP_
contig_15989_179_559_+	1374	6.919	6.8563	7.1624	4.4032	4.2464	6.4815	8.9344	8.8215	6.1423	5.5626	4.7404	4.6907	4.8464	7.6316	7.5404	13.952	12.414	12.024	6.97923	5.0437	7.96607	4.9979	6.6728	12.7967	0.161695	1.24764	1.58044	0.489675	1.58237	1.01937	0.259915	0	0	799	381									KOG1757	Histone 2A	Chromatin structure and dymics	INFORMATION STORAGE AND PROCESSING	PF00125||_GAP_
contig_160152_96_2394_+	1374	10.873	8.8152	9.2088	10.568	5.9449	7.2917	13.402	14.335	15.356	16.688	16.591	14.072	13.57	17.171	14.138	1.744	7.0938	5.1533	9.63233	7.93487	14.3643	15.7837	14.9597	4.6637	1.09232	2.37771	0.97733	1.48314	1.93601	2.7083	-0.496987	0	0.988921	2433	2299	tps:THAPSDRAFT_41005	hypothetical protein						B8C5P9					_GAP_||PF00676||_GAP_||PF02779||PF02780
contig_160154_2116_2775_+	1374	0.98843	0	1.0232	0	0.84928	0	1.1168	2.2054	2.0474	0	0	0.78178	3.8771	3.8158	2.8277	0	0	0	0.670543	0.283093	1.78987	0.260593	3.50687	0	0.580968	0.490332	0.588222	0.451361	0.588974	0	0.300337	0.155313	0	2873	660
contig_160211_1_930_+	1374	3.9537	2.9384	2.0464	1.7613	1.6986	1.6204	4.4672	4.4108	4.0948	2.384	3.9503	3.9089	8.7235	5.7237	6.5979	1.744	1.7735	3.4355	2.9795	1.69343	4.32427	3.4144	7.01503	2.31767	0.954314	0.0705919	0.200715	0.892593	1.54279	0.968184	0.0574213	0	0	1618	930													_GAP_||PF00248
contig_160588_295_837_-	1374	0	0	0	0.88064	0	0	3.3504	2.2054	4.0948	5.5626	3.9503	5.4725	6.785	6.6777	5.6553	0	0	0	0	0.293547	3.21687	4.99513	6.37267	0	0	0.508438	0.951752	0.905973	0.62357	0	0.751796	1	0	1170	543	vcn:VOLCADRAFT_108876	rpl15; component of cytosolic 80S ribosome and 60S large subunit; K02877 large subunit ribosomal protein L15e							KOG1678	60s ribosomal protein L15	Translation, ribosomal structure and biogenesis	INFORMATION STORAGE AND PROCESSING	PF00827
contig_160688_41_841_+	1374	0	0	0	0	0	0	0	0	0	0.79465	2.3702	0.78178	2.9078	2.8619	2.8277	3.4881	5.3204	5.1533	0	0	0	1.31554	2.8658	4.65393	0	0	0	0.913382	0.0401922	1.01309	2.57812	1	0	1102	801	pmk:MDS_4333	ribulose-phosphate 3-epimerase; K01783 ribulose-phosphate 3-epimerase [EC:5.1.3.1]	pmk00040||pmk01120||pmk01110||pmk00030||pmk01100	K01783	ribulose-phosphate 3-epimerase [EC:5.1.3.1]	Pentose phosphate pathway || Pentose and glucurote interconversions || Carbon fixation in photosynthetic organisms || Carbon metabolism || Biosynthesis of amino acids	5.1.3.1						_GAP_||PF00834
contig_160705_1_1216_+	1374	18.78	19.589	18.418	16.732	16.986	14.583	27.92	27.567	25.593	9.5358	9.4807	9.3814	5.8157	6.6777	6.5979	3.4881	3.5469	3.4355	18.929	16.1003	27.0267	9.46597	6.36377	3.49017	0.599551	1.32017	1.25407	0.0782473	0.476314	0.0557287	-3.43801	0	1	1414	1216
contig_160710_1_512_+	1374	14.827	16.651	14.325	7.9257	11.89	8.9121	12.285	9.9242	12.285	1.5893	3.1602	0.78178	9.6928	10.493	9.4256	0	0	0	15.2677	9.57593	11.4981	1.84376	9.87047	0	1.22401	2.06384	1.36301	1.20946	0.555437	0	0.902596	1	0	1528	512	ppp:PHYPADRAFT_199261	hypothetical protein						A9TXI8	KOG2240	R polymerase II general transcription factor BTF3 and related proteins	Transcription	INFORMATION STORAGE AND PROCESSING	_GAP_||PF01849||_GAP_
contig_160851_143_934_-	1374	0	0	0	0	0	0	0	0	0	2.384	3.9503	3.1271	1.9386	2.8619	1.8851	3.4881	1.7735	1.7178	0	0	0	3.1538	2.22853	2.32647	0	0	0	0.783491	0.549164	1.00639	0.484105	0.875794	0	1613	792	tps:THAPSDRAFT_40771	ENO2; enolase (EC:4.2.1.11); K01689 enolase [EC:4.2.1.11]	tps01100||tps01110||tps00010||tps03018	K01689	enolase [EC:4.2.1.11]	Glycolysis / Gluconeogenesis || Methane metabolism || Carbon metabolism || Biosynthesis of amino acids || R degradation || HIF-1 sigling pathway	4.2.1.11	B8C355	KOG2670	Enolase	Carbohydrate transport and metabolism	METABOLISM	PF00113
contig_160878_1111_2485_+	1374	0	0	0	0	0.84928	0.81019	4.4672	3.3081	4.0948	0	0.79006	0.78178	0	0	0	0	0	0	0	0.553157	3.9567	0.523947	0	0	0	0.479446	0.591762	0.45377	0	0	0.894216	0.999539	0	2487	1375	ava:Ava_0910	UvrB/UvrC protein; K03696 ATP-dependent Clp protease ATP-binding subunit ClpC		K03696	ATP-dependent Clp protease ATP-binding subunit ClpC			Q3MEQ2					_GAP_||PF07724||PF10431
contig_160965_78_1187_+	1374	26.688	27.425	26.603	26.419	23.78	21.875	23.453	24.259	22.522	12.714	11.061	11.727	3.8771	4.7698	3.7702	8.7202	7.0938	6.871	26.9053	24.0247	23.4113	11.834	4.13903	7.56167	0.452047	2.28186	0.869249	0.831678	0.548869	1.00948	0.199335	0	0	2187	1110													_GAP_||PF13499||PF13202||PF00036||_GAP_||PF13405||PF00036||_GAP_
contig_161161_1052_1738_+	1374	1.9769	1.9589	2.0464	6.1644	5.0957	5.6713	1.1168	0	0	0.79465	2.3702	1.5636	0	0	0.94256	0	0	0	1.99407	5.6438	0.372267	1.57615	0.314187	0	0.046207	0.53488	0.644785	0.78785	0.544187	0	-0.431537	0	0.714127	3423	687	pti:PHATRDRAFT_48888	hypothetical protein						B7G8R0
contig_161161_57_1040_+	1374	3.9537	1.9589	3.0696	8.8064	8.4928	8.9121	6.7008	5.5134	5.1185	3.1786	4.7404	3.1271	5.8157	4.7698	4.7128	1.744	1.7735	1.7178	2.99407	8.7371	5.77757	3.68203	5.09943	1.7451	0.999543	0.218071	0.823563	0.916934	0.62096	0.0278663	-1.20598	0	1	3423	984	pti:PHATRDRAFT_48888	hypothetical protein						B7G8R0
contig_161196_983_1825_+	1374	6.919	5.8768	6.1392	7.9257	10.191	8.1019	1.1168	2.2054	1.0237	19.072	18.961	17.981	2.9078	3.8158	2.8277	5.2321	3.5469	3.4355	6.31167	8.73953	1.44863	18.6713	3.18377	4.0715	0.542083	1.26009	0.65703	0.600417	0.54882	1.00665	0.888663	1	0	2906	843	pti:PHATRDRAFT_19661	hypothetical protein; K03969 phage shock protein A		K03969	phage shock protein A			B7FWP5					_GAP_||PF04012
contig_161357_178_1313_-	1374	2.9653	1.9589	2.0464	2.6419	3.3971	4.051	4.4672	4.4108	5.1185	6.3572	5.5304	3.9089	5.8157	2.8619	3.7702	0	0	0	2.32353	3.36333	4.6655	5.2655	4.14927	0	0.557506	0.705157	0.393322	1.24546	1.51294	0	-0.135267	0	0.00479793	3706	1136
contig_161357_1904_3703_-	1374	3.9537	3.9179	4.0928	4.4032	5.0957	5.6713	8.9344	6.6161	8.1897	11.125	11.061	13.29	7.7543	8.5856	9.4256	0	0	0	3.98813	5.05673	7.9134	11.8253	8.5885	0	0.0923945	0.634947	1.18359	1.26884	0.835654	0	-0.940055	0	0.999986	3706	1800	pti:PHATRDRAFT_54686	hypothetical protein						B7G2A6
contig_16151_17_922_+	1374	10.873	11.754	13.302	9.687	9.342	8.9121	1.1168	0	0	5.5626	6.3205	1.5636	0	0	0	0	0	0	11.9763	9.3137	0.372267	4.48223	0	0	1.22967	0.388224	0.644785	2.55586	0	0	0.532535	0.999946	0	1074	906													PF00595||PF00612||_GAP_
contig_161525_2033_2440_+	1374	6.919	8.8152	9.2088	5.2838	3.3971	4.051	6.7008	5.5134	4.0948	3.9733	3.9503	3.9089	0	0	0	0	0	0	8.31433	4.24397	5.43633	3.94417	0	0	1.22431	0.958038	1.30471	0.0326352	0	0	-2.01245	0	1	2695	408
contig_16160_1_643_+	1374	1.9769	1.9589	3.0696	1.7613	4.2464	2.4306	1.1168	2.2054	2.0474	4.7679	3.9503	3.9089	3.8771	3.8158	3.7702	5.2321	5.3204	3.4355	2.33513	2.81277	1.78987	4.20903	3.82103	4.66267	0.63613	1.28587	0.588222	0.484435	0.0536418	1.06367	0.673207	1	0	917	643	smm:Smp_090230	60S ribosomal protein L13a ; K02872 large subunit ribosomal protein L13Ae	smm03010	K02872	large subunit ribosomal protein L13Ae	Ribosome		C4QLF3	KOG3204	60S ribosomal protein L13a	Translation, ribosomal structure and biogenesis	INFORMATION STORAGE AND PROCESSING	PF00572||_GAP_
contig_161677_1_1184_+	1374	0	0	0	0	0	0	1.1168	0	0	3.1786	2.3702	3.1271	4.8464	5.7237	3.7702	8.7202	10.641	8.5888	0	0	0.372267	2.89197	4.7801	9.31667	0	0	0.644785	0.452596	0.978436	1.14879	1.31216	1	0	1185	1184
contig_161681_1075_2274_+	1374	9.8843	11.754	8.1856	8.8064	7.6435	7.2917	13.402	14.335	15.356	28.608	27.652	28.144	29.078	29.573	26.392	54.065	58.524	58.404	9.9413	7.91387	14.3643	28.1347	28.3477	56.9977	1.78488	0.792719	0.97733	0.478068	1.71165	2.54047	0.937373	1	0	2849	1200	pti:PHATR_46841	hypothetical protein						B5Y3Y1
contig_161764_75_1084_+	1374	0	0	0	0.88064	0	0.81019	0	0	1.0237	2.384	2.3702	0	3.8771	4.7698	4.7128	1.744	0	1.7178	0	0.56361	0.341233	1.58473	4.45323	1.15393	0	0.48937	0.591033	1.37244	0.499759	0.999421	0.410965	0.539037	0	1085	1010	tps:THAPSDRAFT_41178	ATP phosphoribosyltransferase (EC:2.4.2.17); K00765 ATP phosphoribosyltransferase [EC:2.4.2.17]	tps01100||tps01110||tps00340	K00765	ATP phosphoribosyltransferase [EC:2.4.2.17]	Histidine metabolism || Biosynthesis of amino acids	2.4.2.17	B8C4E1	KOG2831	ATP phosphoribosyltransferase	Amino acid transport and metabolism	METABOLISM	_GAP_||PF01634||PF08029||_GAP_
contig_161777_1965_2579_-	1374	8.8959	4.8973	8.1856	12.329	9.342	11.343	4.4672	4.4108	7.166	1.5893	0.79006	1.5636	0.96928	1.9079	0.94256	0	0	0	7.32627	11.0047	5.348	1.31432	1.27325	0	2.13332	1.52197	1.57469	0.454204	0.549788	0	-0.967538	0	1	2664	615	pti:PHATRDRAFT_22357	GL; GL, glutamine synthase; K01915 glutamine synthetase [EC:6.3.1.2]	pti01100||pti00330||pti00910||pti00250	K01915	glutamine synthetase [EC:6.3.1.2]	Alanine, aspartate and glutamate metabolism || Arginine and proline metabolism || Glyoxylate and dicarboxylate metabolism || Nitrogen metabolism || Biosynthesis of amino acids || Two-component system || Glutamatergic sypse || GABAergic sypse	6.3.1.2	B7G6Q6					_GAP_||PF12437
contig_161777_449_1929_-	1374	11.861	13.713	13.302	14.971	17.835	17.014	13.402	12.13	12.285	4.7679	3.9503	5.4725	3.8771	4.7698	5.6553	1.744	1.7735	1.7178	12.9587	16.6067	12.6057	4.73023	4.7674	1.7451	0.972566	1.47481	0.693986	0.761799	0.889102	0.0278663	-0.742918	0	1	2664	1481	tps:THAPSDRAFT_270138	GLNN; hypothetical protein; K01915 glutamine synthetase [EC:6.3.1.2]	tps01100||tps00910||tps00250||tps00330	K01915	glutamine synthetase [EC:6.3.1.2]	Alanine, aspartate and glutamate metabolism || Arginine and proline metabolism || Glyoxylate and dicarboxylate metabolism || Nitrogen metabolism || Biosynthesis of amino acids || Two-component system || Glutamatergic sypse || GABAergic sypse	6.3.1.2	B8CGK1					PF00120||_GAP_
contig_161787_1161_1812_-	1374	6.919	5.8768	5.116	5.2838	5.9449	5.6713	6.7008	6.6161	7.166	4.7679	5.5304	4.6907	0.96928	0.95395	2.8277	0	0	0	5.9706	5.63333	6.82763	4.99633	1.58364	0	0.905153	0.332181	0.296079	0.464123	1.07741	0	0.154118	0.00019613	0	1813	652	kla:KLLA0E16347g	hypothetical protein; K03671 thioredoxin 1		K03671	thioredoxin 1			Q6CN03					_GAP_||PF00085||_GAP_
contig_161915_71_874_+	1374	1.9769	1.9589	1.0232	2.6419	2.5478	4.8611	2.2336	1.1027	2.0474	2.384	0.79006	0.78178	0	0	0	0	0	0	1.653	3.35027	1.79457	1.31861	0	0	0.545497	1.30927	0.606364	0.922661	0	0	0.527403	1	0	2609	804	tps:THAPSDRAFT_1738	hypothetical protein						B8BRT2					_GAP_||PF00574
contig_16193_176_547_-	1374	0	0	0	0	0	0	0	0	0	0	0	0	1.9386	0.95395	0	5.2321	5.3204	5.1533	0	0	0	0	0.964183	5.23527	0	0	0	0	0.969341	0.083595	1.65163	1	0	719	372
contig_16200_233_677_-	1374	5.9306	2.9384	4.0928	2.6419	2.5478	1.6204	2.2336	2.2054	2.0474	3.9733	1.5801	2.3453	1.9386	0.95395	0	0	0	0	4.3206	2.27003	2.16213	2.6329	0.964183	0	1.50905	0.564563	0.100357	1.22225	0.969341	0	0.601499	1	0	677	445									KOG0544	FKBP-type peptidyl-prolyl cis-trans isomerase	Posttranslatiol modification, protein turnover, chaperones	CELLULAR PROCESSES AND SIGLING	_GAP_||PF00254
contig_162079_527_988_-	1374	4.9422	3.9179	3.0696	5.2838	5.0957	5.6713	5.584	4.4108	3.0711	7.9465	7.1106	7.8178	6.785	9.5395	6.5979	6.9762	8.8673	5.1533	3.97657	5.35027	4.3553	7.62497	7.6408	6.99893	0.937677	0.2935	1.25737	0.450079	1.64698	1.8571	0.932221	1	0	1436	462	ppp:PHYPADRAFT_190565	hypothetical protein; K02936 large subunit ribosomal protein L7Ae	ppp03010	K02936	large subunit ribosomal protein L7Ae	Ribosome		A9T135	KOG3166	60S ribosomal protein L7A	Translation, ribosomal structure and biogenesis	INFORMATION STORAGE AND PROCESSING	PF01248||_GAP_
contig_162092_1_999_+	1374	6.919	5.8768	7.1624	10.568	7.6435	10.532	10.051	7.7188	6.1423	3.9733	6.3205	6.2542	4.8464	5.7237	4.7128	0	3.5469	1.7178	6.65273	9.58117	7.9707	5.516	5.0943	1.7549	0.682909	1.67817	1.96649	1.33643	0.549154	1.77374	-0.881911	0	1	2763	999	tps:THAPSDRAFT_8775	hypothetical protein						B8LC05
contig_162109_230_1422_-	1374	0	0	0	0	0	0	0	0	0	2.384	0.79006	3.1271	3.8771	1.9079	4.7128	5.2321	5.3204	6.871	0	0	0	2.10039	3.49927	5.80783	0	0	0	1.19405	1.44012	0.921787	1.05553	1	0	1506	1193	ota:Ot09g03520	hypothetical protein						Q011B9					_GAP_||PF07082||_GAP_
contig_162142_1053_1652_-	1374	2.9653	1.9589	3.0696	1.7613	2.5478	2.4306	2.2336	3.3081	2.0474	1.5893	2.3702	3.1271	1.9386	0.95395	1.8851	3.4881	3.5469	3.4355	2.6646	2.24657	2.5297	2.3622	1.59255	3.49017	0.613375	0.424319	0.680513	0.768931	0.55369	0.0557287	0.560758	1	0	1833	600	ddi:DDB_G0268402	rab24; Rab GTPase; K07976 Rab family, other		K07976	Rab family, other			Q55FU9	KOG0078	GTP-binding protein SEC4, small G protein superfamily, and related Ras family GTP-binding proteins	Sigl transduction mechanisms	CELLULAR PROCESSES AND SIGLING	PF00071
contig_162182_1_1809_+	1374	6.919	6.8563	8.1856	7.0451	5.9449	6.4815	0	0	0	2.384	3.1602	1.5636	0	0	0	0	0	0	7.3203	6.4905	0	2.36927	0	0	0.750027	0.550155	0	0.798402	0	0	-0.724349	0	1	2071	1809	vcn:VOLCADRAFT_98923	hypothetical protein
contig_16227_362_637_-	1374	4.9422	4.8973	7.1624	5.2838	5.9449	4.051	1.1168	0	1.0237	3.9733	3.9503	3.1271	0	0	0	0	0	0	5.6673	5.09323	0.7135	3.68357	0	0	1.29499	0.961224	0.61966	0.482051	0	0	1.02585	1	0	637	276
contig_162292_2247_3328_-	1374	0	0	0	1.7613	2.5478	0.81019	4.4672	3.3081	2.0474	0.79465	1.5801	0.78178	0	0	0	0	0	0	0	1.70643	3.27423	1.05218	0	0	0	0.870104	1.21026	0.45724	0	0	-0.00805915	0	0	3331	1082									KOG0749	Mitochondrial ADP/ATP carrier proteins	Energy production and conversion	METABOLISM	_GAP_||PF00153
contig_162358_215_883_-	1374	3.9537	1.9589	3.0696	3.5225	5.0957	3.2408	3.3504	2.2054	4.0948	0.79465	0	0.78178	0	0.95395	1.8851	0	0	0	2.99407	3.953	3.21687	0.525477	0.94635	0	0.999543	0.999581	0.951752	0.455122	0.942573	0	-0.722062	0	1	1506	669
contig_162380_163_918_-	1374	0.98843	1.9589	1.0232	1.7613	3.3971	1.6204	1.1168	1.1027	4.0948	2.384	3.9503	3.1271	0.96928	0.95395	2.8277	0	0	0	1.32351	2.2596	2.10477	3.1538	1.58364	0	0.550538	0.98762	1.72343	0.783491	1.07741	0	0.823496	1	0	977	756	ddi:DDB_G0267390	psmB6; 20S proteasome subunit beta-6; K02738 20S proteasome subunit beta 1 [EC:3.4.25.1]	ddi03050	K02738	20S proteasome subunit beta 1 [EC:3.4.25.1]	Proteasome	3.4.25.1	Q55GJ6	KOG0174	20S proteasome, regulatory subunit beta type PSMB6/PSMB9/PRE3	Posttranslatiol modification, protein turnover, chaperones	CELLULAR PROCESSES AND SIGLING	_GAP_||PF00227
contig_162537_141_893_-	1374	0	0	0	3.5225	4.2464	1.6204	1.1168	1.1027	0	1.5893	1.5801	1.5636	0	0	0	0	0	0	0	3.12977	0.739833	1.57767	0	0	0	1.35634	0.640753	0.0130216	0	0	0.491805	0.968778	0	1190	753
contig_162614_200_961_-	1374	3.9537	1.9589	3.0696	3.5225	3.3971	4.051	4.4672	4.4108	4.0948	2.384	1.5801	1.5636	4.8464	3.8158	3.7702	3.4881	3.5469	3.4355	2.99407	3.65687	4.32427	1.84257	4.14413	3.49017	0.999543	0.34704	0.200715	0.468968	0.608608	0.0557287	0.200534	0	0	990	762	sgr:SGR_4708	acyl-CoA synthetase; K00666 fatty-acyl-CoA synthase [EC:6.2.1.-]		K00666	fatty-acyl-CoA synthase [EC:6.2.1.-]			B1VW26
contig_162627_112_882_+	1374	0	0	0	0.88064	1.6986	1.6204	1.1168	4.4108	3.0711	2.384	2.3702	3.1271	3.8771	3.8158	3.7702	1.744	0	0	0	1.39988	2.86623	2.6271	3.82103	0.581333	0	0.451372	1.65653	0.433068	0.0536418	1.0069	0.812936	1	0	1093	771									KOG0857	60s ribosomal protein L10	Translation, ribosomal structure and biogenesis	INFORMATION STORAGE AND PROCESSING	_GAP_||PF00252||_GAP_
contig_162714_1422_1988_-	1374	0.98843	0.97947	1.0232	1.7613	0	0	5.584	4.4108	4.0948	4.7679	3.1602	3.9089	7.7543	7.6316	5.6553	3.4881	1.7735	5.1533	0.997033	0.5871	4.69653	3.94567	7.01373	3.47163	0.0230996	1.01689	0.784641	0.80448	1.17804	1.68996	1.03064	1	0	2307	567
contig_162941_1140_1535_+	1374	4.9422	4.8973	5.116	5.2838	4.2464	5.6713	5.584	6.6161	5.1185	4.7679	5.5304	5.4725	10.662	9.5395	11.311	15.696	15.961	15.46	4.98517	5.06717	5.77287	5.25693	10.5042	15.7057	0.115508	0.736738	0.766456	0.424504	0.896235	0.25064	1.00188	1	0	1679	396	tps:THAPSDRAFT_21815	AMS1; probable S-adenosylmethionine synthetase; K00789 S-adenosylmethionine synthetase [EC:2.5.1.6]	tps01100||tps01110||tps00270	K00789	S-adenosylmethionine synthetase [EC:2.5.1.6]	Cysteine and methionine metabolism || Biosynthesis of amino acids	2.5.1.6	B8BY55	KOG1506	S-adenosylmethionine synthetase	Coenzyme transport and metabolism	METABOLISM	PF02773||_GAP_
contig_163424_78_933_+	1374	3.9537	4.8973	4.0928	3.5225	3.3971	3.2408	6.7008	5.5134	5.1185	4.7679	3.1602	3.1271	7.7543	7.6316	7.5404	6.9762	8.8673	8.5888	4.3146	3.3868	5.77757	3.68507	7.6421	8.1441	0.509403	0.141132	0.823563	0.937907	0.107336	1.02097
contig_163446_482_964_-	1374	0.98843	0.97947	2.0464	1.7613	0.84928	0.81019	2.2336	1.1027	2.0474	3.9733	3.1602	3.1271	2.9078	2.8619	3.7702	3.4881	1.7735	3.4355	1.3381	1.14026	1.79457	3.4202	3.17997	2.89903	0.613422	0.538194	0.606364	0.479284	0.511672	0.975095	0.734607	0.999907	0	1255	483													PF13460||_GAP_
contig_163452_343_903_-	1374	0	0	0	0	0	0	0	0	0	1.5893	0.79006	0	4.8464	3.8158	3.7702	8.7202	8.8673	12.024	0	0	0	0.79312	4.14413	9.8705	0	0	0	0.794654	0.608608	1.86644	1.45237	1	0	1467	561									KOG3539	Spondins, extracellular matrix proteins	Extracellular structures	CELLULAR PROCESSES AND SIGLING	_GAP_||PF06468
contig_163938_319_1745_-	1374	19.769	24.487	21.487	17.613	18.684	14.583	6.7008	5.5134	9.2134	7.9465	5.5304	6.2542	5.8157	7.6316	9.4256	0	0	1.7178	21.9143	16.96	7.14253	6.57703	7.6243	0.5726	2.38785	2.12705	1.88914	1.23998	1.80496	0.991772	-0.796989	0	1	1746	1427	sng:SNE_A00500	type 11 methyltransferase											_GAP_||PF03407||_GAP_
contig_163970_1_627_+	1374	2.9653	1.9589	2.0464	4.4032	4.2464	1.6204	0	0	0	3.1786	2.3702	2.3453	0	0	0	0	0	0	2.32353	3.42333	0	2.63137	0	0	0.557506	1.56335	0	0.474081	0	0	0.115106	0.000690617	0	737	627	tps:THAPSDRAFT_21114	hypothetical protein						B8BTE1
contig_164028_1_1049_+	1374	6.919	5.8768	6.1392	12.329	12.739	16.204	18.986	14.335	15.356	10.33	7.9006	9.3814	12.601	11.447	12.253	6.9762	3.5469	5.1533	6.31167	13.7573	16.2257	9.204	12.1003	5.22547	0.542083	2.12877	2.44442	1.22438	0.591954	1.71579	-0.266349	0	6.43e-05	1613	1049	mes:Meso_3162	phosphoserine aminotransferase (EC:2.6.1.52); K00831 phosphoserine aminotransferase [EC:2.6.1.52]	mes00750||mes00680||mes00260||mes01120||mes01100	K00831	phosphoserine aminotransferase [EC:2.6.1.52]	Glycine, serine and threonine metabolism || Methane metabolism || Vitamin B6 metabolism || Carbon metabolism || Biosynthesis of amino acids	2.6.1.52	Q11DJ1					_GAP_||PF00266
contig_164172_42_1414_+	1374	3.9537	1.9589	3.0696	5.2838	5.0957	5.6713	6.7008	7.7188	7.166	3.1786	3.9503	3.9089	8.7235	7.6316	8.483	8.7202	8.8673	8.5888	2.99407	5.35027	7.1952	3.67927	8.27937	8.72543	0.999543	0.2935	0.509628	0.434084	0.573726	0.139324	-0.777228	0	1	2478	1373
contig_164314_1_475_+	1374	4.9422	3.9179	4.0928	4.4032	3.3971	2.4306	2.2336	3.3081	3.0711	2.384	2.3702	3.1271	0	0.95395	0.94256	1.744	1.7735	1.7178	4.31763	3.4103	2.87093	2.6271	0.63217	1.7451	0.547914	0.986366	0.564524	0.433068	0.547505	0.0278663	0.271479	0.0150207	0	656	475
contig_164375_236_994_-	1374	1.9769	1.9589	2.0464	0	0.84928	0	0	0	0	3.1786	3.1602	3.1271	1.9386	1.9079	0.94256	1.744	1.7735	1.7178	1.99407	0.283093	0	3.1553	1.59635	1.7451	0.046207	0.490332	0	0.0260973	0.56641	0.0278663	0.252244	0.0169407	0	1084	759													_GAP_||PF02542||_GAP_
contig_164562_33_767_+	1374	3.9537	4.8973	5.116	3.5225	3.3971	3.2408	2.2336	3.3081	2.0474	3.1786	3.1602	3.1271	1.9386	1.9079	1.8851	1.744	1.7735	1.7178	4.65567	3.3868	2.5297	3.1553	1.91053	1.7451	0.617677	0.141132	0.680513	0.0260973	0.026847	0.0278663	0.983855	0.999999	0	931	735													PF00215
contig_164673_1_391_+	1374	2.9653	3.9179	3.0696	0	0.84928	0	0	0	0	2.384	0	0.78178	0	0	0	0	0	0	3.3176	0.283093	0	1.05526	0	0	0.522484	0.490332	0	1.2153	0	0	1.01796	1	0	560	391	tps:THAPSDRAFT_10741	hypothetical protein						B8CED8
contig_164761_137_538_-	1374	0.98843	0	0	0	0.84928	0	0	0	0	4.7679	4.7404	3.9089	0.96928	0	0	0	0	1.7178	0.329477	0.283093	0	4.4724	0.323093	0.5726	0.57067	0.490332	0	0.488199	0.559614	0.991772	1.52794	1	0	578	402
contig_16557_193_831_-	1374	1.9769	2.9384	3.0696	2.6419	3.3971	3.2408	0	0	0	3.1786	3.9503	3.1271	0	0	0	0	0	0	2.66163	3.09327	0	3.41867	0	0	0.596614	0.398631	0	0.461127	0	0	0.119002	0	0	831	639
contig_165631_1_429_-	1374	0.98843	0.97947	1.0232	2.6419	2.5478	2.4306	7.8176	5.5134	7.166	7.1519	5.5304	6.2542	7.7543	9.5395	7.5404	0	0	0	0.997033	2.5401	6.83233	6.31217	8.27807	0	0.0230996	0.10586	1.18779	0.812303	1.09766	0	0.531573	0.999355	0	686	429									KOG0830	40S ribosomal protein SA (P40)/Laminin receptor 1	Translation, ribosomal structure and biogenesis	INFORMATION STORAGE AND PROCESSING	PF00318
contig_165670_1_777_+	1374	11.861	8.8152	8.1856	0.88064	1.6986	1.6204	7.8176	7.7188	10.237	3.9733	5.5304	6.2542	7.7543	8.5856	8.483	12.208	10.641	8.5888	9.6206	1.39988	8.59113	5.25263	8.2743	10.4793	1.96562	0.451372	1.42622	1.16554	0.453246	1.81501	0.805211	1	0	777	777									KOG0096	GTPase Ran/TC4/GSP1 (nuclear protein transport pathway), small G protein superfamily	Intracellular trafficking, secretion, and vesicular transport	CELLULAR PROCESSES AND SIGLING	_GAP_||PF00071
contig_166109_1_935_+	1374	7.9075	5.8768	8.1856	8.8064	6.7942	8.1019	4.4672	5.5134	4.0948	7.9465	7.9006	7.036	7.7543	8.5856	8.483	8.7202	7.0938	8.5888	7.3233	7.90083	4.6918	7.6277	8.2743	8.13427	1.2604	1.02106	0.735486	0.512941	0.453246	0.903463	0.243097	2.31e-05	0	1117	935	vcn:VOLCADRAFT_107549	hypothetical protein; K00326 cytochrome-b5 reductase [EC:1.6.2.2]											_GAP_||PF00970||PF00175||_GAP_
contig_166482_190_1466_-	1374	5.9306	3.9179	7.1624	5.2838	5.0957	6.4815	4.4672	5.5134	5.1185	7.9465	5.5304	4.6907	6.785	5.7237	7.5404	5.2321	5.3204	5.1533	5.6703	5.62033	5.03303	6.05587	6.68303	5.23527	1.63784	0.751699	0.528311	1.69031	0.912632	0.083595	-0.169539	0	0.00468376	1560	1277	ppp:PHYPADRAFT_221150	hypothetical protein; K00166 2-oxoisovalerate dehydrogese E1 component, alpha subunit [EC:1.2.4.4]	ppp01110||ppp00280||ppp01100	K00166	2-oxoisovalerate dehydrogese E1 component, alpha subunit [EC:1.2.4.4]	Valine, leucine and isoleucine degradation	1.2.4.4	A9TD44	KOG1182	Branched chain alpha-keto acid dehydrogese complex, alpha subunit	Energy production and conversion	METABOLISM	_GAP_||PF00676||_GAP_
contig_166534_289_1080_-	1374	2.9653	0.97947	3.0696	3.5225	3.3971	0.81019	1.1168	1.1027	1.0237	3.9733	2.3702	4.6907	0	0	0	0	0	0	2.33812	2.5766	1.08107	3.67807	0	0	1.17778	1.53104	0.0501787	1.18809	0	0	0.477055	0.708311	0	1081	792	olu:OSTLU_27692	FBP17-3; peptidyl-prolyl cis-trans isomerase, FKBP-type						A4S816	KOG0552	FKBP-type peptidyl-prolyl cis-trans isomerase	Posttranslatiol modification, protein turnover, chaperones	CELLULAR PROCESSES AND SIGLING	_GAP_||PF00254
contig_166551_1_1014_-	1374	0.98843	0.97947	0	0	0	0.81019	1.1168	2.2054	1.0237	7.9465	8.6907	10.163	10.662	10.493	10.368	10.464	12.414	15.46	0.655967	0.270063	1.44863	8.9334	10.5077	12.7793	0.568101	0.467763	0.65703	1.12801	0.147548	2.51796	0.640008	1	0	1015	1014	pti:PHATR_46842	hypothetical protein						B5Y3Y2
contig_16665_1_726_-	1374	20.757	22.528	21.487	15.851	15.287	17.824	3.3504	3.3081	5.1185	0.79465	0	0	2.9078	1.9079	0.94256	0	0	0	21.5907	16.3207	3.92567	0.264883	1.91942	0	0.89004	1.33212	1.03324	0.458791	0.982671	0	-2.70759	0	1	726	726	pti:PHATRDRAFT_54465	ISIP2A; iron starvation induced protein						B7FYL2					_GAP_||PF07692
contig_166705_30_770_+	1374	2.9653	4.8973	3.0696	1.7613	1.6986	2.4306	0	1.1027	0	0	0	0	0	0	0	0	0	0	3.64407	1.9635	0.367567	0	0	0	1.08658	0.405733	0.636644	0	0	0	0.54226	0.999995	0	988	741
contig_166810_310_748_-	1374	0	0	0	1.7613	0	0	0	0	1.0237	7.1519	5.5304	7.036	4.8464	4.7698	3.7702	8.7202	7.0938	8.5888	0	0.5871	0.341233	6.57277	4.46213	8.13427	0	1.01689	0.591033	0.904574	0.600455	0.903463	2.12635	1	0	748	439													_GAP_||PF04695
contig_166915_220_894_-	1374	3.9537	4.8973	6.1392	4.4032	3.3971	3.2408	5.584	4.4108	5.1185	7.1519	7.1106	7.8178	6.785	5.7237	4.7128	6.9762	5.3204	3.4355	4.99673	3.68037	5.03777	7.3601	5.7405	5.24403	1.09614	0.630851	0.590752	0.396917	1.0362	1.77158	0.0757186	0.000102646	0	1420	675									KOG2794	Delta-aminolevulinic acid dehydratase	Coenzyme transport and metabolism	METABOLISM	PF00490
contig_167352_182_919_-	1374	1.9769	1.9589	1.0232	2.6419	2.5478	4.051	4.4672	6.6161	5.1185	3.9733	3.1602	4.6907	6.785	6.6777	5.6553	3.4881	7.0938	6.871	1.653	3.08023	5.4006	3.9414	6.37267	5.81763	0.545497	0.842024	1.10187	0.765749	0.62357	2.02051	0.753088	1	0	954	738	vcn:VOLCADRAFT_80373	eif6A; eukaryotic translation initiation factor 6; K03264 translation initiation factor 6							KOG3185	Translation initiation factor 6 (eIF-6)	Translation, ribosomal structure and biogenesis	INFORMATION STORAGE AND PROCESSING	PF01912||_GAP_
contig_167719_158_610_-	1374	1.9769	0.97947	2.0464	1.7613	1.6986	0.81019	0	0	0	3.1786	3.1602	3.1271	0	0	0.94256	0	0	0	1.66759	1.42336	0	3.1553	0.314187	0	0.596942	0.531948	0	0.0260973	0.544187	0	1.45153	1	0	667	453	pti:PHATRDRAFT_52200	hypothetical protein; K03116 sec-independent protein translocase protein TatA	pti03060	K03116	sec-independent protein translocase protein TatA	Protein export || Bacterial secretion system		B7G3S9					_GAP_||PF02416
contig_167780_203_627_-	1374	6.919	6.8563	7.1624	7.9257	9.342	9.7223	8.9344	7.7188	9.2134	11.92	12.641	13.29	6.785	7.6316	5.6553	8.7202	8.8673	6.871	6.97923	8.99667	8.6222	12.617	6.69063	8.15283	0.161695	0.946776	0.794707	0.685315	0.991524	1.11253	1.0931	1	0	627	425	pde:Pden_0685	TolA family protein; K03646 colicin import membrane protein		K03646	colicin import membrane protein			A1AZV3
contig_167829_1_382_+	1374	4.9422	5.8768	4.0928	4.4032	5.9449	4.051	0	1.1027	0	2.384	2.3702	2.3453	1.9386	1.9079	0.94256	0	0	0	4.9706	4.7997	0.367567	2.3665	1.59635	0	0.892339	1.00729	0.636644	0.0196135	0.56641	0	0.864301	1	0	556	382	vcn:VOLCADRAFT_75495	hypothetical protein											_GAP_||PF00505
contig_167844_235_549_-	1374	0	0	0	0	0	0	0	0	1.0237	5.5626	4.7404	4.6907	7.7543	8.5856	7.5404	6.9762	7.0938	5.1533	0	0	0.341233	4.9979	7.9601	6.40777	0	0	0.591033	0.489675	0.552156	1.08799	1.99965	1	0	907	315	spo:SPCC191.07	cyc1; cytochrome c (predicted); K08738 cytochrome c		K08738	cytochrome c	Sulfur metabolism || Two-component system || p53 sigling pathway || Apoptosis || Non-alcoholic fatty liver disease (FLD) || Alzheimer's disease || Parkinson's disease || Amyotrophic lateral sclerosis (ALS) || Huntington's disease || Legionellosis || Toxoplasmosis || Tuberculosis || Hepatitis B || Influenza A || Herpes simplex infection || Pathways in cancer || Colorectal cancer || Small cell lung…		P00046	KOG3453	Cytochrome c	Energy production and conversion	METABOLISM	PF00034
contig_167902_832_2057_-	1374	7.9075	7.8357	9.2088	10.568	9.342	11.343	8.9344	9.9242	12.285	7.1519	7.1106	7.8178	9.6928	9.5395	8.483	17.44	19.508	20.613	8.31733	10.4177	10.3812	7.3601	9.23843	19.187	0.772867	1.00894	1.72141	0.396917	0.658699	1.61067	-2.01486	0	1	2286	1226	pti:PHATRDRAFT_50163	hypothetical protein						B7GD57
contig_167917_1_741_+	1374	1.9769	1.9589	2.0464	1.7613	1.6986	0	1.1168	2.2054	3.0711	0.79465	1.5801	0.78178	0.96928	0.95395	1.8851	3.4881	3.5469	3.4355	1.99407	1.1533	2.1311	1.05218	1.26944	3.49017	0.046207	0.999279	0.979266	0.45724	0.533229	0.0557287	0.703869	1	0	852	741	tps:THAPSDRAFT_21444	hypothetical protein						B8BVA1
contig_167954_67_558_+	1374	0.98843	0.97947	2.0464	0	0.84928	0	4.4672	4.4108	4.0948	1.5893	0.79006	1.5636	0.96928	1.9079	2.8277	1.744	3.5469	1.7178	1.3381	0.283093	4.32427	1.31432	1.90163	2.33623	0.613422	0.490332	0.200715	0.454204	0.929226	1.04855	0.8093	1	0	708	492	tro:trd_A0663	endoribonuclease L-PSP						B9L4E9					PF14588
contig_168012_240_823_-	1374	8.8959	8.8152	9.2088	6.1644	5.0957	5.6713	1.1168	0	0	5.5626	5.5304	7.036	1.9386	1.9079	1.8851	3.4881	3.5469	1.7178	8.9733	5.6438	0.372267	6.043	1.91053	2.9176	0.207902	0.53488	0.644785	0.860114	0.026847	1.03947	0.0509927	0	0	823	584									KOG0028	Ca2+-binding protein (centrin/caltractin), EF-Hand superfamily protein	Cytoskeleton	CELLULAR PROCESSES AND SIGLING	_GAP_||PF13499
contig_168233_1869_3945_-	1374	0.98843	0.97947	1.0232	3.5225	2.5478	4.051	0	1.1027	1.0237	0	0	0	0	0.95395	0	3.4881	3.5469	3.4355	0.997033	3.37377	0.7088	0	0.317983	3.49017	0.0230996	0.762557	0.615108	0	0.550763	0.0557287	-4.87461	0	1	5925	2077	cre:CHLREDRAFT_180160	hypothetical protein						A8JH04					_GAP_||PF13385||_GAP_
contig_168299_139_1274_-	1374	0.98843	1.9589	1.0232	2.6419	4.2464	3.2408	5.584	2.2054	3.0711	3.1786	1.5801	0.78178	1.9386	1.9079	2.8277	0	0	0	1.32351	3.37637	3.62017	1.84683	2.22473	0	0.550538	0.810795	1.75495	1.22047	0.52241	0	0.535339	0.971876	0	2058	1136									KOG0455	Homoserine dehydrogese	Amino acid transport and metabolism	METABOLISM	_GAP_||PF00742
contig_168796_1_704_-	1374	27.676	24.487	25.58	27.3	22.93	29.977	35.738	35.286	29.688	26.224	27.652	25.017	31.017	29.573	28.277	50.577	53.204	51.533	25.9143	26.7357	33.5707	26.2977	29.6223	51.7713	1.62058	3.55723	3.37007	1.31904	1.37067	1.32962	0.734837	0.89229	2.06e-05	704	704	mar:MAE_50160	atpA; F0F1 ATP synthase subunit alpha; K02111 F-type H+-transporting ATPase subunit alpha [EC:3.6.3.14]	mar01100||mar00195||mar00190	K02111	F-type H+-transporting ATPase subunit alpha [EC:3.6.3.14]	Oxidative phosphorylation || Photosynthesis	3.6.3.14	B0JWV1					_GAP_||PF00006
contig_169007_1_630_+	1374	3.9537	0.97947	4.0928	4.4032	1.6986	1.6204	0	3.3081	3.0711	2.384	2.3702	3.1271	2.9078	6.6777	6.5979	1.744	1.7735	1.7178	3.00866	2.57407	2.1264	2.6271	5.39447	1.7451	1.7587	1.58456	1.84533	0.433068	2.15389	0.0278663	0.370626	0.39741	0	846	630
contig_169530_1_1642_+	1374	3.9537	5.8768	6.1392	6.1644	5.9449	2.4306	5.584	4.4108	5.1185	10.33	11.061	10.945	5.8157	5.7237	6.5979	3.4881	1.7735	1.7178	5.32323	4.84663	5.03777	10.7787	6.04577	2.32647	1.19329	2.09522	0.590752	0.392862	0.480369	1.00639	-0.593646	0	0.994891	2017	1642	pti:PHATRDRAFT_42567	BGER1; beta-glucan elicitor receptor						B7FNS5	KOG2254	Predicted endo-1,3-beta-glucase	Carbohydrate transport and metabolism	METABOLISM	PF03639||_GAP_
contig_169834_1_1081_+	1374	2.9653	2.9384	3.0696	1.7613	3.3971	1.6204	0	0	1.0237	6.3572	7.1106	7.036	0	0	0	0	0	0	2.9911	2.2596	0.341233	6.8346	0	0	0.0693007	0.98762	0.591033	0.41512	0	0	0.598883	0.997575	0	1082	1081
contig_170678_906_1922_-	1374	20.757	21.548	22.51	27.3	25.478	25.116	26.803	26.465	28.664	23.84	22.912	21.89	15.509	13.355	15.081	13.952	12.414	13.742	21.605	25.9647	27.3107	22.8807	14.6483	13.3693	0.877889	1.17051	1.18414	0.975378	1.14032	0.833979	0.0825775	0	0	2111	1017									KOG0657	Glyceraldehyde 3-phosphate dehydrogese	Carbohydrate transport and metabolism	METABOLISM	PF00044||PF02800||_GAP_
contig_170869_1_309_-	1374	9.8843	10.774	11.255	10.568	8.4928	9.7223	14.518	13.232	12.285	9.5358	7.9006	8.5996	9.6928	8.5856	9.4256	12.208	14.188	12.024	10.6378	9.59437	13.345	8.67867	9.23467	12.8067	0.695431	1.0435	1.12078	0.820462	0.577767	1.1998
contig_171107_116_688_+	1374	3.9537	4.8973	5.116	1.7613	3.3971	3.2408	1.1168	0	1.0237	0.79465	0.79006	0.78178	0	0	0	0	0	0	4.65567	2.79973	0.7135	0.78883	0	0	0.617677	0.902699	0.61966	0.00652257	0	0	0.892706	1	0	2193	573													_GAP_||PF00595||_GAP_
contig_171698_1_278_-	1374	0	0	0	0	0	0	0	0	0	1.5893	0.79006	0.78178	11.631	10.493	10.368	3.4881	5.3204	3.4355	0	0	0	1.05371	10.8307	4.08133	0	0	0	0.46385	0.695921	1.07339
contig_172062_155_2042_-	1374	3.9537	4.8973	5.116	2.6419	2.5478	4.051	6.7008	6.6161	6.1423	3.9733	3.9503	3.9089	4.8464	4.7698	4.7128	8.7202	7.0938	5.1533	4.65567	3.08023	6.4864	3.94417	4.77633	6.9891	0.617677	0.842024	0.300994	0.0326352	0.0670392	1.78575	-0.113768	0	0	2044	1888	cre:CHLREDRAFT_106450	FAP250; flagellar associated protein						A8JB22	KOG0001	Ubiquitin and ubiquitin-like proteins	Posttranslatiol modification, protein turnover, chaperones	CELLULAR PROCESSES AND SIGLING	_GAP_||PF00240||_GAP_||PF14772||_GAP_||PF14775||_GAP_
contig_172099_97_503_-	1374	14.827	13.713	15.348	14.971	15.287	17.824	13.402	12.13	11.261	11.125	12.641	10.945	5.8157	6.6777	4.7128	12.208	14.188	12.024	14.6293	16.0273	12.2643	11.5703	5.7354	12.8067	0.835231	1.56396	1.0768	0.931582	0.984908	1.1998	0.0757154	0	0	503	407	pti:PHATRDRAFT_49286	hypothetical protein						B7GA37
contig_172105_120_824_+	1374	0	0	0	0	0	0	0	0	0	0	0	0	1.9386	2.8619	2.8277	5.2321	3.5469	1.7178	0	0	0	0	2.54273	3.49893	0	0	0	0	0.523474	1.75764	0.263297	6.63e-05	0	1159	705	cyc:PCC7424_3730	rplM; 50S ribosomal protein L13; K02871 large subunit ribosomal protein L13	cyc03010	K02871	large subunit ribosomal protein L13	Ribosome		B7KI14					_GAP_||PF00572||_GAP_
contig_172376_57_797_+	1374	5.9306	5.8768	5.116	6.1644	7.6435	6.4815	5.584	5.5134	4.0948	7.1519	5.5304	7.036	0	0	0.94256	0	0	0	5.64113	6.76313	5.06407	6.57277	0.314187	0	0.455574	0.778731	0.840151	0.904574	0.544187	0	-0.361242	0	0.0333791	1038	741
contig_176884_1_526_+	1374	0.98843	3.9179	1.0232	2.6419	1.6986	2.4306	1.1168	1.1027	1.0237	4.7679	5.5304	6.2542	0.96928	0.95395	0.94256	0	0	0	1.97651	2.25703	1.08107	5.5175	0.955263	0	1.68138	0.495023	0.0501787	0.743234	0.0134083	0	-0.415944	0	0.920103	526	526													PF00504
contig_179264_646_1005_+	1374	0	0	1.0232	1.7613	1.6986	1.6204	2.2336	1.1027	2.0474	3.9733	4.7404	3.9089	1.9386	1.9079	1.8851	0	0	0	0.341067	1.69343	1.79457	4.20753	1.91053	0	0.590745	0.0705919	0.606364	0.462598	0.026847	0	0.744559	1	0	2929	360									KOG1628	40S ribosomal protein S3A	Translation, ribosomal structure and biogenesis	INFORMATION STORAGE AND PROCESSING	PF01015
contig_179302_1_1086_+	1374	7.9075	7.8357	8.1856	9.687	10.191	8.1019	10.051	8.8215	7.166	12.714	11.851	14.854	5.8157	6.6777	6.5979	10.464	5.3204	10.307	7.97627	9.32663	8.6795	13.1397	6.36377	8.69713	0.184808	1.09018	1.44773	1.54609	0.476314	2.92539	-0.441311	0	0.71532	4634	1086	gur:Gura_4409	pyruvate kise (EC:2.7.1.40); K00873 pyruvate kise [EC:2.7.1.40]	gur00620||gur01110||gur00010||gur01120||gur00230||gur01100	K00873	pyruvate kise [EC:2.7.1.40]	Glycolysis / Gluconeogenesis || Purine metabolism || Pyruvate metabolism || Carbon metabolism || Biosynthesis of amino acids || Type II diabetes mellitus || Viral carcinogenesis	2.7.1.40	A5G9T4					_GAP_||PF00224
contig_179327_2057_2911_-	1374	2.9653	3.9179	4.0928	2.6419	3.3971	2.4306	1.1168	0	2.0474	0	0	0.78178	0	0	0	0	0	0	3.65867	2.8232	1.05473	0.260593	0	0	0.606808	0.508117	1.02511	0.451361	0	0	-0.910633	0	1	3539	855									KOG1339	Aspartyl protease	Posttranslatiol modification, protein turnover, chaperones	CELLULAR PROCESSES AND SIGLING	PF00026||_GAP_
contig_179539_1029_2776_+	1374	2.9653	2.9384	3.0696	3.5225	2.5478	4.8611	5.584	3.3081	3.0711	2.384	1.5801	1.5636	3.8771	3.8158	2.8277	0	0	0	2.9911	3.6438	3.98773	1.84257	3.50687	0	0.0693007	1.16141	1.38748	0.468968	0.588974	0	-0.43696	0	0.825028	3086	1748	pfa:PFL0915c	conserved Plasmodium protein						Q8I5L9					_GAP_||PF13385||_GAP_
contig_179583_1_682_-	1374	8.8959	8.8152	8.1856	8.8064	8.4928	8.1019	10.051	7.7188	9.2134	3.9733	3.1602	3.1271	8.7235	6.6777	7.5404	3.4881	5.3204	3.4355	8.63223	8.46703	8.9944	3.4202	7.6472	4.08133	0.388895	0.352956	1.18142	0.479284	1.02707	1.07339	0.285305	0.000120575	0	1139	682	tet:TTHERM_00442880	Protein kise domain containing protein											PF13499||_GAP_
contig_179615_981_2023_-	1374	24.711	23.507	23.534	20.255	21.232	19.445	5.584	5.5134	9.2134	5.5626	3.9503	7.036	5.8157	4.7698	4.7128	0	0	0	23.9173	20.3107	6.77027	5.5163	5.09943	0	0.687468	0.8948	2.11611	1.54337	0.62096	0	-2.14222	0	1	2025	1043	pti:PHATRDRAFT_54465	ISIP2A; iron starvation induced protein						B7FYL2
contig_179722_205_1931_-	1374	0	0	0	0.88064	1.6986	0.81019	0	0	0	3.1786	5.5304	3.9089	7.7543	8.5856	7.5404	10.464	3.5469	6.871	0	1.12981	0	4.20597	7.9601	6.96063	0	0.493844	0	1.20371	0.552156	3.45942	0.0570048	0	0	2436	1727													_GAP_||PF01593
contig_179854_26_751_+	1374	9.8843	9.7947	12.278	14.09	15.287	17.014	13.402	16.54	13.308	9.5358	11.061	9.3814	9.6928	11.447	8.483	15.696	15.961	15.46	10.6523	15.4637	14.4167	9.99273	9.87427	15.7057	1.40858	1.46998	1.83946	0.928362	1.49031	0.25064	-1.4777	0	1	1395	726
contig_179854_885_1232_+	1374	3.9537	3.9179	4.0928	6.1644	5.0957	5.6713	4.4672	4.4108	6.1423	3.1786	4.7404	3.9089	2.9078	4.7698	3.7702	1.744	0	0	3.98813	5.6438	5.00677	3.94263	3.81593	0.581333	0.0923945	0.53488	0.983805	0.781446	0.931842	1.0069	-0.623974	0	0.963474	1395	348	amr:AM1_1470	hypothetical protein						B0C7V7
contig_180064_1_1085_+	1374	0	0	0	0	0	0	0	0	0	3.1786	1.5801	1.5636	10.662	10.493	10.368	8.7202	7.0938	8.5888	0	0	0	2.10743	10.5077	8.13427	0	0	0	0.927694	0.147548	0.903463	0.109018	0.00406239	2.96e-06	1086	1085	pti:PHATRDRAFT_54465	ISIP2A; iron starvation induced protein						B7FYL2					PF07692
contig_180144_2040_2720_+	1374	9.8843	8.8152	9.2088	8.8064	9.342	8.9121	1.1168	1.1027	1.0237	3.1786	3.1602	3.1271	0.96928	0.95395	1.8851	5.2321	1.7735	5.1533	9.30277	9.02017	1.08107	3.1553	1.26944	4.05297	0.540709	0.283682	0.0501787	0.0260973	0.533229	1.97447	-2.70665	0	1	4405	681
contig_180163_144_1828_-	1374	1.9769	2.9384	3.0696	4.4032	2.5478	2.4306	2.2336	2.2054	4.0948	0	0	0	0	0	0	0	0	0	2.66163	3.1272	2.8446	0	0	0	0.596614	1.1066	1.0828	0	0	0	-0.784924	0	1	2691	1685
contig_180267_107_955_-	1374	7.9075	5.8768	6.1392	8.8064	8.4928	8.9121	6.7008	6.6161	7.166	6.3572	5.5304	6.2542	5.8157	4.7698	4.7128	8.7202	5.3204	5.1533	6.64117	8.7371	6.82763	6.04727	5.09943	6.39797	1.1045	0.218071	0.296079	0.450573	0.62096	2.01285	-0.606795	0	0.993184	978	849									KOG3075	Ribose 5-phosphate isomerase	Carbohydrate transport and metabolism	METABOLISM	_GAP_||PF06026
contig_180411_49_825_+	1374	26.688	22.528	26.603	22.897	22.93	18.634	12.285	13.232	16.379	23.84	22.122	22.672	22.293	24.803	21.679	20.929	26.602	25.766	25.273	21.487	13.9653	22.878	22.925	24.4323	2.37762	2.47083	2.14326	0.87733	1.65512	3.06263	0.190976	0	0	825	777									KOG2670	Enolase	Carbohydrate transport and metabolism	METABOLISM	PF03952||PF00113
contig_180565_1_1815_-	1374	0	0	0	1.7613	0	0	0	1.1027	0	3.1786	2.3702	3.1271	4.8464	5.7237	5.6553	3.4881	1.7735	1.7178	0	0.5871	0.367567	2.89197	5.40847	2.32647	0	1.01689	0.636644	0.452596	0.487964	1.00639	-0.591761	0	0.999925	1816	1815	vcn:VOLCADRAFT_106040	hypothetical protein
contig_180982_209_709_-	1374	6.919	6.8563	8.1856	5.2838	6.7942	8.1019	3.3504	1.1027	2.0474	5.5626	3.9503	6.2542	0	0	0.94256	0	1.7735	0	7.3203	6.72663	2.16683	5.2557	0.314187	0.591167	0.750027	1.41026	1.1286	1.18221	0.544187	1.02393	0.253094	0.038384	0	1118	501	nve:NEMVE_v1g240544	hypothetical protein						A7RTD9	KOG1474	Transcription initiation factor TFIID, subunit BDF1 and related bromodomain proteins	Transcription	INFORMATION STORAGE AND PROCESSING	_GAP_||PF00439||_GAP_
contig_184292_72_1273_+	1374	0	0	0	1.7613	0.84928	0.81019	2.2336	2.2054	3.0711	4.7679	3.1602	4.6907	3.8771	2.8619	1.8851	0	0	0	0	1.14026	2.50337	4.20627	2.8747	0	0	0.538194	0.491874	0.906742	0.996062	0	0.20007	0.000425149	0	1557	1202													_GAP_||PF01063
contig_184329_1057_1383_+	1374	1.9769	0.97947	1.0232	5.2838	4.2464	3.2408	3.3504	3.3081	4.0948	4.7679	5.5304	5.4725	2.9078	4.7698	5.6553	3.4881	3.5469	3.4355	1.32652	4.257	3.58443	5.25693	4.4443	3.49017	0.563667	1.02154	0.442496	0.424504	1.40237	0.0557287	1.6005	1	0	1559	327	tps:THAPS_269935	hisD, histidinol dehydrogese (EC:1.1.1.23)						B5YLM0					PF00815
contig_184329_53_1009_+	1374	3.9537	4.8973	3.0696	5.2838	4.2464	5.6713	5.584	6.6161	5.1185	6.3572	6.3205	6.2542	4.8464	4.7698	5.6553	6.9762	7.0938	8.5888	3.97353	5.06717	5.77287	6.31063	5.0905	7.55293	0.914011	0.736738	0.766456	0.0522041	0.490628	0.899012	0.935004	1	0	1559	957													PF00815
contig_184409_1447_1899_-	1374	0	0	0	0.88064	0.84928	0.81019	3.3504	2.2054	3.0711	5.5626	3.9503	4.6907	2.9078	4.7698	4.7128	0	0	0	0	0.846703	2.87563	4.73453	4.13013	0	0	0.0352956	0.597002	0.807043	1.05896	0	0.813555	1	0	2083	453									KOG0829	60S ribosomal protein L18A	Translation, ribosomal structure and biogenesis	INFORMATION STORAGE AND PROCESSING	PF01775||_GAP_
contig_184558_803_2162_-	1374	0.98843	0.97947	1.0232	0	0	0	0	3.3081	2.0474	0.79465	1.5801	1.5636	1.9386	3.8158	2.8277	5.2321	5.3204	3.4355	0.997033	0	1.78517	1.31278	2.8607	4.66267	0.0230996	0	1.66957	0.448792	0.939035	1.06367	-0.178134	0	1.63e-05	2164	1360													_GAP_||PF02836||_GAP_
contig_184700_1_1211_+	1374	0	0	0	0	0	0	0	0	0	4.7679	3.9503	4.6907	5.8157	3.8158	3.7702	1.744	0	0	0	0	0	4.46963	4.46723	0.581333	0	0	0	0.451409	1.16803	1.0069	0.842166	0.999316	0	1212	1211
contig_184982_1291_2159_+	1374	1.9769	1.9589	4.0928	4.4032	4.2464	4.8611	3.3504	4.4108	6.1423	7.9465	7.1106	5.4725	3.8771	3.8158	3.7702	1.744	3.5469	0	2.6762	4.50357	4.6345	6.8432	3.82103	1.76363	1.22684	0.319404	1.40933	1.25849	0.0536418	1.77353	0.320982	6.33e-07	0	2410	869	cyn:Cyan7425_1508	phosphoglycerate mutase; K01834 phosphoglycerate mutase [EC:5.4.2.1]	cyn01120||cyn00010||cyn01110||cyn01100||cyn00680	K01834	2,3-bisphosphoglycerate-dependent phosphoglycerate mutase [EC:5.4.2.11]	Glycolysis / Gluconeogenesis || Glycine, serine and threonine metabolism || Methane metabolism || Carbon metabolism || Biosynthesis of amino acids	5.4.2.1	B8HPL7					_GAP_||PF00300||_GAP_
contig_185035_82_864_-	1374	4.9422	6.8563	6.1392	7.0451	5.0957	6.4815	8.9344	7.7188	9.2134	5.5626	5.5304	5.4725	7.7543	9.5395	8.483	6.9762	7.0938	5.1533	5.97923	6.20743	8.6222	5.52183	8.59227	6.40777	0.967025	1.00318	0.794707	0.0456568	0.897602	1.08799	0.297999	0	0	943	783	ppp:PHYPADRAFT_162696	hypothetical protein; K04802 proliferating cell nuclear antigen	ppp03420||ppp03410||ppp03030||ppp03430	K04802	proliferating cell nuclear antigen	D replication || Base excision repair || Nucleotide excision repair || Mismatch repair || Cell cycle || Hepatitis B || HTLV-I infection		A9S3Y9	KOG1636	D polymerase delta processivity factor (proliferating cell nuclear antigen)	Replication, recombition and repair	INFORMATION STORAGE AND PROCESSING	PF00705||PF02747
contig_185052_387_1190_+	1374	1.9769	1.9589	2.0464	3.5225	2.5478	2.4306	1.1168	1.1027	2.0474	9.5358	9.4807	9.3814	3.8771	3.8158	3.7702	1.744	1.7735	3.4355	1.99407	2.83363	1.4223	9.46597	3.82103	2.31767	0.046207	0.599447	0.541398	0.0782473	0.0536418	0.968184	0.947592	1	0	1419	804									KOG3295	60S Ribosomal protein L13	Translation, ribosomal structure and biogenesis	INFORMATION STORAGE AND PROCESSING	PF01294||_GAP_
contig_185063_177_935_-	1374	0	0.97947	0	1.7613	2.5478	6.4815	2.2336	2.2054	0	3.9733	4.7404	2.3453	0	0.95395	0.94256	0	0	0	0.32649	3.59687	1.47967	3.68633	0.63217	0	0.565497	2.52893	1.28151	1.22307	0.547505	0	0.287525	0.00077552	0	3042	759	tps:THAPSDRAFT_1875	hypothetical protein						B8BS65					_GAP_||PF00650||_GAP_
contig_185114_1165_2584_-	1374	29.653	28.404	29.673	7.0451	11.041	8.9121	45.789	45.21	45.043	1.5893	1.5801	0.78178	24.232	20.987	21.679	26.161	24.828	22.331	29.2433	8.9994	45.3473	1.31706	22.2993	24.44	0.726953	1.99938	0.391503	0.463589	1.70913	1.94426	-4.04096	0	1	2586	1420													_GAP_||PF02812||PF00208
contig_185134_202_981_-	1374	1.9769	2.9384	3.0696	0.88064	1.6986	2.4306	3.3504	4.4108	4.0948	6.3572	5.5304	6.2542	3.8771	2.8619	3.7702	0	0	0	2.66163	1.66995	3.952	6.04727	3.50307	0	0.596614	0.775377	0.544432	0.450573	0.557833	0	0.6637	1	0	981	780									KOG0185	20S proteasome, regulatory subunit beta type PSMB4/PRE4	Posttranslatiol modification, protein turnover, chaperones	CELLULAR PROCESSES AND SIGLING	_GAP_||PF00227||_GAP_
contig_185149_936_1274_-	1374	0	0	0	0.88064	1.6986	0.81019	0	0	0	6.3572	6.3205	6.2542	1.9386	1.9079	2.8277	0	0	0	0	1.12981	0	6.31063	2.22473	0	0	0.493844	0	0.0522041	0.52241	0	0.474381	0.998484	0	2602	339									KOG1475	Ribosomal protein RPL1/RPL2/RL4L4	R processing and modification	INFORMATION STORAGE AND PROCESSING	PF00573
contig_185196_334_921_-	1374	0.98843	2.9384	1.0232	2.6419	2.5478	2.4306	2.2336	4.4108	2.0474	1.5893	2.3702	3.9089	5.8157	6.6777	4.7128	1.744	0	0	1.65001	2.5401	2.89727	2.6228	5.7354	0.581333	1.11591	0.10586	1.31406	1.18025	0.984908	1.0069	-0.663367	0	1	1640	588	tps:THAPSDRAFT_1415	hypothetical protein						B8BQW0
contig_185249_1048_1578_+	1374	0	0	0	0	0	0	3.3504	3.3081	3.0711	4.7679	3.9503	3.9089	2.9078	3.8158	3.7702	0	0	0	0	0	3.2432	4.20903	3.49793	0	0	0	0.150536	0.484435	0.511579	0	0.36667	0.146593	0	1980	531									KOG2550	IMP dehydrogese/GMP reductase	Nucleotide transport and metabolism	METABOLISM	PF00478
contig_185250_233_934_-	1374	14.827	10.774	13.302	13.21	11.89	8.9121	13.402	14.335	12.285	11.92	11.851	13.29	10.662	16.217	14.138	15.696	14.188	13.742	12.9677	11.3374	13.3407	12.3537	13.6723	14.542	2.04708	2.2016	1.02638	0.811622	2.80662	1.02397	0.559239	1	0	2792	702									KOG2670	Enolase	Carbohydrate transport and metabolism	METABOLISM	PF00113
contig_185250_967_1722_-	1374	21.746	19.589	22.51	14.971	17.835	17.824	13.402	14.335	17.403	16.688	17.381	19.545	19.386	17.171	16.966	17.44	15.961	18.895	21.2817	16.8767	15.0467	17.8713	17.841	17.432	1.51485	1.65036	2.09329	1.49028	1.34193	1.46702	0.0361685	0	0	2792	756	ppp:PHYPADRAFT_207186	hypothetical protein; K01689 enolase [EC:4.2.1.11]	ppp01110||ppp00010||ppp03018||ppp01100	K01689	enolase [EC:4.2.1.11]	Glycolysis / Gluconeogenesis || Methane metabolism || Carbon metabolism || Biosynthesis of amino acids || R degradation || HIF-1 sigling pathway	4.2.1.11	A9RZD9	KOG2670	Enolase	Carbohydrate transport and metabolism	METABOLISM	_GAP_||PF03952||PF00113
contig_185518_1_1454_+	1374	0.98843	0	0	4.4032	4.2464	4.051	12.285	12.13	11.261	11.92	11.061	8.5996	14.539	13.355	16.966	3.4881	3.5469	5.1533	0.329477	4.23353	11.892	10.5269	14.9533	4.06277	0.57067	0.176452	0.55193	1.72344	1.84081	0.944887	0.392394	0.273167	0	1930	1454									KOG1339	Aspartyl protease	Posttranslatiol modification, protein turnover, chaperones	CELLULAR PROCESSES AND SIGLING	_GAP_||PF00026
contig_185685_1_701_+	1374	7.9075	4.8973	9.2088	8.8064	8.4928	8.1019	8.9344	11.027	9.2134	9.5358	9.4807	9.3814	7.7543	7.6316	8.483	13.952	12.414	12.024	7.33787	8.46703	9.72493	9.46597	7.9563	12.7967	2.21147	0.352956	1.13622	0.0782473	0.460243	1.01937	0.747624	1	0	2406	701	vfm:VFMJ11_0110	pyrE; orotate phosphoribosyltransferase (EC:2.4.2.10); K00762 orotate phosphoribosyltransferase [EC:2.4.2.10]	vfm01100||vfm00240	K00762	orotate phosphoribosyltransferase [EC:2.4.2.10]	Pyrimidine metabolism	2.4.2.10	B5FFE3					_GAP_||PF00156||_GAP_
contig_185722_1_736_+	1374	0	0	0	0	0	0	0	0	0	0.79465	0.79006	0.78178	2.9078	1.9079	3.7702	5.2321	5.3204	5.1533	0	0	0	0.78883	2.86197	5.23527	0	0	0	0.00652257	0.931996	0.083595	-0.386276	1.65e-06	0.459662	736	736
contig_185735_94_1223_+	1374	0.98843	0.97947	2.0464	0.88064	0.84928	0.81019	0	0	2.0474	3.9733	3.1602	3.9089	2.9078	4.7698	3.7702	3.4881	3.5469	3.4355	1.3381	0.846703	0.682467	3.6808	3.81593	3.49017	0.613422	0.0352956	1.18207	0.452001	0.931842	0.0557287	0.142084	0	0	3699	1130	pti:PHATRDRAFT_15068	HemF_1; coproporphyrinogen III oxidase; K00228 coproporphyrinogen III oxidase [EC:1.3.3.3]	pti01100||pti00860||pti01110	K00228	coproporphyrinogen III oxidase [EC:1.3.3.3]	Porphyrin and chlorophyll metabolism	1.3.3.3	B7G7A5	KOG1518	Coproporphyrinogen III oxidase CPO/HEM13	Coenzyme transport and metabolism	METABOLISM	_GAP_||PF01218
contig_185826_1_1902_-	1374	11.861	9.7947	8.1856	7.9257	9.342	7.2917	12.285	12.13	11.261	3.9733	2.3702	3.1271	12.601	12.401	13.196	5.2321	3.5469	5.1533	9.9471	8.18647	11.892	3.15687	12.7327	4.6441	1.84243	1.04973	0.55193	0.801964	0.413532	0.95102	-1.37903	0	1	2115	1902	tps:THAPS_23419	hypothetical protein						B5YMN9
contig_185846_77_910_+	1374	4.9422	4.8973	4.0928	12.329	11.89	10.532	17.869	18.746	16.379	15.098	16.591	14.072	14.539	15.263	16.966	31.393	24.828	27.484	4.6441	11.5837	17.6647	15.2537	15.5893	27.9017	0.477967	0.936847	1.19666	1.26669	1.24597	3.30237	0.874011	1	0	2363	834	pti:PHATRDRAFT_16302	Lhcf12; protein fucoxanthin chlorophyll protein						B7GCA2					_GAP_||PF00504
contig_186176_1_1503_+	1374	0	0	0	0	0	0	3.3504	2.2054	3.0711	7.9465	7.9006	8.5996	20.355	14.309	17.909	6.9762	7.0938	5.1533	0	0	2.87563	8.1489	17.5243	6.40777	0	0	0.597002	0.390992	3.0413	1.08799	-0.733516	0	1	2543	1503													_GAP_||PF12418||PF02771||PF02770||_GAP_||PF00441
contig_186176_1622_2148_+	1374	0	0	0	0	0	0	1.1168	0	1.0237	2.384	0.79006	0	3.8771	3.8158	5.6553	1.744	1.7735	1.7178	0	0	0.7135	1.05802	4.4494	1.7451	0	0	0.61966	1.21438	1.04479	0.0278663	-0.00756599	0	0	2543	527	prw:PsycPRwf_0116	acyl-CoA dehydrogese domain-containing protein; K00257 [EC:1.3.99.-]	prw01110||prw01120||prw00626||prw00281	K00257		Geraniol degradation		A5WBN5					_GAP_||PF12806
contig_186570_1_879_+	1374	3.9537	2.9384	4.0928	5.2838	5.0957	4.8611	3.3504	3.3081	3.0711	3.1786	0.79006	3.9089	3.8771	2.8619	1.8851	1.744	0	1.7178	3.66163	5.0802	3.2432	2.62585	2.8747	1.15393	0.630188	0.211776	0.150536	1.63124	0.996062	0.999421	0.313853	0.000911617	0	1172	879	hsa:832	CAPZB, CAPB, CAPPB, CAPZ, MGC104401, MGC129749, MGC129750; capping protein (actin filament) muscle Z-line, beta; K10365 capping protein (actin filament) muscle Z-line, beta							KOG3174	F-actin capping protein, beta subunit	Cytoskeleton	CELLULAR PROCESSES AND SIGLING	PF01115
contig_187089_73_978_+	1374	1.9769	2.9384	2.0464	0.88064	2.5478	1.6204	2.2336	2.2054	2.0474	3.9733	3.9503	3.1271	2.9078	1.9079	2.8277	1.744	1.7735	1.7178	2.32057	1.68295	2.16213	3.68357	2.5478	1.7451	0.536187	0.835338	0.100357	0.482051	0.555615	0.0278663	1.004	1	0	1457	906	pti:PHATRDRAFT_47565	hypothetical protein						B7G440	KOG1175	Acyl-CoA synthetase	Lipid transport and metabolism	METABOLISM	PF00501||_GAP_
contig_187365_196_963_-	1374	0	0	0	0	0	0	0	0	0	1.5893	1.5801	0.78178	3.8771	3.8158	3.7702	3.4881	3.5469	3.4355	0	0	0	1.31706	3.82103	3.49017	0	0	0	0.463589	0.0536418	0.0557287	1.9924	1	0	1090	768	pti:PHATR_13244	hypothetical protein; K00428 cytochrome c peroxidase [EC:1.11.1.5]		K00428	cytochrome c peroxidase [EC:1.11.1.5]		1.11.1.5	B5Y3E9					PF00141
contig_187646_528_1038_-	1374	8.8959	7.8357	7.1624	3.5225	1.6986	2.4306	5.584	5.5134	5.1185	5.5626	5.5304	4.6907	0	0	0	0	0	0	7.96467	2.55057	5.4053	5.26123	0	0	0.873916	0.917849	0.250872	0.494359	0	0	-0.0353235	0	0	1039	511	pti:PHATRDRAFT_49037	hypothetical protein						B7G9A2	KOG0004	Ubiquitin/40S ribosomal protein S27a fusion	Translation, ribosomal structure and biogenesis	INFORMATION STORAGE AND PROCESSING	PF00240||PF09055
contig_188078_1_1888_+	1374	6.919	5.8768	6.1392	4.4032	5.9449	4.8611	1.1168	1.1027	0	0	0	0	0	0	0	0	0	0	6.31167	5.06973	0.739833	0	0	0	0.542083	0.791742	0.640753	0	0	0	-1.2771	0	1	1889	1888
contig_188231_374_853_+	1374	0	0.97947	0	0	0	0	0	0	0	3.1786	3.1602	3.1271	0	0.95395	0.94256	0	0	0	0.32649	0	0	3.1553	0.63217	0	0.565497	0	0	0.0260973	0.547505	0	1.21783	1	0	1228	480									KOG1722	60s ribosomal protein L24	Translation, ribosomal structure and biogenesis	INFORMATION STORAGE AND PROCESSING	PF01246||_GAP_
contig_188381_66_593_+	1374	6.919	6.8563	4.0928	3.5225	2.5478	1.6204	2.2336	1.1027	2.0474	1.5893	1.5801	3.1271	2.9078	2.8619	2.8277	6.9762	3.5469	6.871	5.95603	2.56357	1.79457	2.09883	2.8658	5.79803	1.61391	0.951148	0.606364	0.890517	0.0401922	1.95025	-0.262532	0	1.81e-05	1471	528	syf:Synpcc7942_2352	sigma 54 modulation protein / SSU ribosomal protein S30P; K05808 putative sigma-54 modulation protein		K05808	putative sigma-54 modulation protein			Q31KN7					_GAP_||PF02482||_GAP_
contig_188443_72_962_+	1374	6.919	7.8357	8.1856	10.568	6.7942	10.532	11.168	14.335	9.2134	4.7679	3.1602	3.1271	9.6928	12.401	11.311	5.2321	3.5469	5.1533	7.64677	9.29807	11.5721	3.68507	11.1349	4.6441	0.654095	2.16849	2.58461	0.937907	1.36266	0.95102	-0.139494	0	0	1312	891
contig_188457_453_992_-	1374	2.9653	3.9179	3.0696	1.7613	1.6986	2.4306	2.2336	1.1027	1.0237	2.384	1.5801	3.1271	0.96928	0.95395	0.94256	1.744	1.7735	1.7178	3.3176	1.9635	1.45333	2.36373	0.955263	1.7451	0.522484	0.405733	0.676884	0.773699	0.0134083	0.0278663	1.18671	1	0	1341	540	tad:TRIADDRAFT_63622	expressed hypothetical protein						B3R5					_GAP_||PF01086
contig_188595_991_1398_-	1374	0	0.97947	1.0232	0	0.84928	0.81019	1.1168	1.1027	2.0474	1.5893	0.79006	0.78178	3.8771	2.8619	3.7702	1.744	0	0	0.667557	0.553157	1.4223	1.05371	3.50307	0.581333	0.578534	0.479446	0.541398	0.46385	0.557833	1.0069	-0.775624	0	0.999985	1488	408
contig_189234_192_935_+	1374	2.9653	3.9179	5.116	3.5225	3.3971	4.051	7.8176	7.7188	8.1897	1.5893	2.3702	2.3453	7.7543	5.7237	5.6553	3.4881	3.5469	1.7178	3.99973	3.65687	7.9087	2.1016	6.37777	2.9176	1.07768	0.34704	0.248317	0.443839	1.1926	1.03947	-0.383598	0	0.276454	1187	744
contig_189953_516_1043_-	1374	4.9422	2.9384	4.0928	4.4032	5.0957	4.051	11.168	13.232	11.261	4.7679	4.7404	4.6907	11.631	9.5395	11.311	6.9762	8.8673	6.871	3.99113	4.51663	11.887	4.733	10.8272	7.5715	1.00576	0.531507	1.16573	0.0391284	1.12657	1.12343	0.463347	0.997907	0	1469	528													PF01549
contig_190586_622_1418_+	1374	1.9769	1.9589	0	1.7613	2.5478	2.4306	6.7008	7.7188	4.0948	3.1786	2.3702	2.3453	0.96928	0.95395	0.94256	0	0	0	1.31193	2.24657	6.17147	2.63137	0.955263	0	1.1362	0.424319	1.86909	0.474081	0.0134083	0	0.485169	0.999999	0	2055	797	tps:THAPSDRAFT_270092	hypothetical protein						B8CFP9					_GAP_||PF00504||_GAP_
contig_190919_1_1027_+	1374	0.98843	0	1.0232	0.88064	0.84928	0.81019	0	0	0	0.79465	0.79006	1.5636	3.8771	3.8158	2.8277	1.744	0	1.7178	0.670543	0.846703	0	1.04944	3.50687	1.15393	0.580968	0.0352956	0	0.445284	0.588974	0.999421	0.462299	0.996667	0	1693	1027
contig_193027_287_802_-	1374	0	0	1.0232	0.88064	0.84928	0.81019	1.1168	1.1027	3.0711	3.1786	1.5801	3.1271	2.9078	3.8158	3.7702	1.744	1.7735	0	0.341067	0.846703	1.76353	2.6286	3.49793	1.1725	0.590745	0.0352956	1.13241	0.908393	0.511579	1.01552	0.093366	9.87e-07	0	936	516
contig_193198_47_751_+	1374	6.919	7.8357	7.1624	5.2838	6.7942	2.4306	1.1168	2.2054	2.0474	0	0	0	0	0.95395	0	0	0	0	7.3057	4.8362	1.78987	0	0.317983	0	0.474854	2.21597	0.588222	0	0.550763	0	0.19237	0.000352607	0	751	705									KOG0027	Calmodulin and related proteins (EF-Hand superfamily)	Sigl transduction mechanisms	CELLULAR PROCESSES AND SIGLING	PF13499||_GAP_
contig_198929_471_995_-	1374	2.9653	2.9384	2.0464	1.7613	1.6986	0	1.1168	1.1027	0	3.9733	4.7404	4.6907	0	0	0	0	0	0	2.65003	1.1533	0.739833	4.46813	0	0	0.522935	0.999279	0.640753	0.429258	0	0	1.34166	1	0	6518	525									KOG0907	Thioredoxin	Posttranslatiol modification, protein turnover, chaperones	CELLULAR PROCESSES AND SIGLING	_GAP_||PF00085
contig_199236_1_2840_-	1374	4.9422	4.8973	4.0928	0.88064	0.84928	0.81019	1.1168	1.1027	0	1.5893	0.79006	0.78178	1.9386	2.8619	3.7702	1.744	1.7735	0	4.6441	0.846703	0.739833	1.05371	2.8569	1.1725	0.477967	0.0352956	0.640753	0.46385	0.91581	1.01552	-1.75865	0	1	2842	2840	vcn:VOLCADRAFT_79478	flagellar outer dynein arm heavy chain beta											PF00121||_GAP_||PF08393
contig_199286_67_627_+	1374	3.9537	3.9179	4.0928	4.4032	3.3971	3.2408	2.2336	2.2054	1.0237	4.7679	3.1602	3.9089	0.96928	0.95395	0.94256	1.744	0	1.7178	3.98813	3.68037	1.8209	3.94567	0.955263	1.15393	0.0923945	0.630851	0.690539	0.80448	0.0134083	0.999421	0.55366	1	0	1419	561
contig_199332_1057_2049_+	1374	2.9653	3.9179	4.0928	3.5225	5.0957	4.051	3.3504	3.3081	4.0948	4.7679	3.1602	7.036	2.9078	4.7698	3.7702	5.2321	5.3204	6.871	3.65867	4.22307	3.58443	4.98803	3.81593	5.80783	0.606808	0.80059	0.442496	1.94725	0.931842	0.921787	-0.291904	0	1.74e-05	3089	993	tps:THAPSDRAFT_9830	CBL1; cystathionine beta-lyase						B8CCE6					_GAP_||PF01053
contig_199332_2067_2330_+	1374	4.9422	3.9179	4.0928	4.4032	4.2464	4.051	3.3504	3.3081	4.0948	3.9733	3.1602	3.9089	2.9078	2.8619	2.8277	5.2321	3.5469	5.1533	4.31763	4.23353	3.58443	3.6808	2.8658	4.6441	0.547914	0.176452	0.442496	0.452001	0.0401922	0.95102	0.453666	0.866469	0	3089	264	tbr:Tb09.211.3330	cystathione gamma lyase (EC:2.5.1.-); K00810 [EC:2.5.1.-]		K00810				Q38DH3					PF01053
contig_199332_72_701_+	1374	0.98843	2.9384	3.0696	3.5225	3.3971	3.2408	2.2336	2.2054	3.0711	2.384	2.3702	3.9089	0	0	0.94256	0	0	0	2.33214	3.3868	2.50337	2.8877	0.314187	0	1.16554	0.141132	0.491874	0.884412	0.544187	0	1.20895	1	0	3089	630													_GAP_||PF00504
contig_199359_268_1168_-	1374	0	0	0	0.88064	0	0	0	0	0	3.1786	3.1602	4.6907	0	0	0	0	0	0	0	0.293547	0	3.6765	0	0	0	0.508438	0	0.878371	0	0	1.32599	1	0	1169	901	tps:THAPSDRAFT_270092	hypothetical protein						B8CFP9					_GAP_||PF00504
contig_199534_961_2933_-	1374	2.9653	0.97947	3.0696	2.6419	2.5478	0.81019	2.2336	1.1027	4.0948	2.384	3.1602	1.5636	5.8157	6.6777	5.6553	1.744	0	1.7178	2.33812	1.99996	2.47703	2.36927	6.04957	1.15393	1.17778	1.03145	1.51083	0.798402	0.54986	0.999421	-0.510358	0	0.998741	3418	1973	cgr:CAGL0G07667g	hypothetical protein						Q6FSU9	KOG3017	Defense-related protein containing SCP domain	Function unknown	POORLY CHARACTERIZED	_GAP_||PF00188||_GAP_
contig_199623_717_1756_-	1374	4.9422	5.8768	7.1624	0.88064	1.6986	0.81019	0	1.1027	1.0237	2.384	1.5801	1.5636	0.96928	0.95395	0.94256	1.744	0	1.7178	5.9938	1.12981	0.7088	1.84257	0.955263	1.15393	1.11471	0.493844	0.615108	0.468968	0.0134083	0.999421	-0.261914	0	0	1995	1040
contig_199647_2434_3067_-	1374	1.9769	2.9384	3.0696	1.7613	1.6986	2.4306	3.3504	3.3081	3.0711	4.7679	3.1602	3.9089	2.9078	2.8619	3.7702	6.9762	3.5469	5.1533	2.66163	1.9635	3.2432	3.94567	3.17997	5.22547	0.596614	0.405733	0.150536	0.80448	0.511672	1.71579	0.647755	0.999825	0	3070	634	olu:OSTLU_32169	hypothetical protein						A4RYW7					_GAP_||PF07802||_GAP_
contig_199744_319_1174_-	1374	1.9769	1.9589	1.0232	0.88064	1.6986	2.4306	6.7008	8.8215	6.1423	3.9733	4.7404	3.9089	3.8771	3.8158	5.6553	0	0	0	1.653	1.66995	7.22153	4.20753	4.4494	0	0.545497	0.775377	1.41347	0.462598	1.04479	0	0.986382	1	0	1175	856									KOG0178	20S proteasome, regulatory subunit alpha type PSMA4/PRE9	Posttranslatiol modification, protein turnover, chaperones	CELLULAR PROCESSES AND SIGLING	_GAP_||PF00227||_GAP_
contig_199798_1_1013_-	1374	2.9653	3.9179	4.0928	1.7613	2.5478	1.6204	1.1168	1.1027	1.0237	0	0	0	0	0	0	0	0	0	3.65867	1.9765	1.08107	0	0	0	0.606808	0.499751	0.0501787	0	0	0	-0.784026	0	1	1227	1013	tps:THAPSDRAFT_10526	hypothetical protein						B8LCW7					_GAP_||PF05050||_GAP_
contig_200276_195_1990_-	1374	19.769	17.63	17.394	15.851	14.438	17.014	1.1168	1.1027	2.0474	8.7412	11.061	10.163	9.6928	9.5395	7.5404	6.9762	3.5469	3.4355	18.2643	15.7677	1.4223	9.9884	8.92423	4.65287	1.30841	1.29002	0.541398	1.16971	1.20088	2.01284	-0.665614	0	1	1991	1796
contig_200281_1_928_-	1374	9.8843	9.7947	9.2088	11.448	9.342	11.343	14.518	13.232	14.332	8.7412	7.9006	8.5996	17.447	16.217	14.138	12.208	14.188	10.307	9.62927	10.711	14.0273	8.4138	15.934	12.2343	0.36688	1.18675	0.695029	0.450048	1.67255	1.94063	-1.65546	0	1	1814	928	tet:TTHERM_00979910	Leishmanolysin family protein (EC:3.4.24.36)
contig_200302_301_2938_-	1374	0	0	0	0	0	0	1.1168	0	0	0	0.79006	0.78178	3.8771	4.7698	2.8277	0	1.7735	1.7178	0	0	0.372267	0.523947	3.82487	1.16377	0	0	0.644785	0.45377	0.972103	1.00824	-0.760624	0	1	5547	2638
contig_200548_214_2827_-	1374	7.9075	2.9384	5.116	4.4032	3.3971	1.6204	0	0	0	1.5893	0.79006	0	0	0	0	0	0	0	5.32063	3.14023	0	0.79312	0	0	2.49086	1.40907	0	0.794654	0	0	-1.03172	0	1	2849	2614	avn:Avin_36650	tolA; TolA protein; K03646 colicin import membrane protein		K03646	colicin import membrane protein			C1DRF4
contig_200735_394_732_-	1374	0	0	0	0	0	0	0	0	0	5.5626	4.7404	4.6907	10.662	9.5395	8.483	20.929	19.508	22.331	0	0	0	4.9979	9.5615	20.9227	0	0	0	0.489675	1.08967	1.41151	1.21247	0.999999	2.39e-23	812	339
contig_201584_1_1221_+	1374	1.9769	1.9589	2.0464	2.6419	2.5478	2.4306	2.2336	4.4108	3.0711	3.1786	4.7404	5.4725	2.9078	5.7237	3.7702	1.744	1.7735	3.4355	1.99407	2.5401	3.2385	4.46383	4.1339	2.31767	0.046207	0.10586	1.09821	1.17169	1.44275	0.968184	0.456115	0.946221	0	2486	1221	pti:PHATRDRAFT_19188	HemE_2; uroporphyrinogen decarboxylase; K01599 uroporphyrinogen decarboxylase [EC:4.1.1.37]	pti01100||pti00860||pti01110	K01599	uroporphyrinogen decarboxylase [EC:4.1.1.37]	Porphyrin and chlorophyll metabolism	4.1.1.37	B7FUT6					_GAP_||PF01208
contig_201638_61_378_+	1374	0	1.9589	1.0232	1.7613	1.6986	0.81019	4.4672	4.4108	4.0948	2.384	3.1602	2.3453	3.8771	3.8158	3.7702	5.2321	5.3204	5.1533	0.994033	1.42336	4.32427	2.62983	3.82103	5.23527	0.979776	0.531948	0.200715	0.459718	0.0536418	0.083595	0.526955	0.940261	0	1504	318
contig_201775_58_1038_+	1374	3.9537	4.8973	4.0928	4.4032	5.0957	2.4306	2.2336	1.1027	2.0474	4.7679	4.7404	3.9089	0.96928	0.95395	1.8851	0	0	0	4.3146	3.9765	1.79457	4.4724	1.26944	0	0.509403	1.38284	0.606364	0.488199	0.533229	0	0.0476933	0	0	1943	981	rah:Rahaq_4024	carbote dehydratase (EC:4.2.1.1); K01674 carbonic anhydrase [EC:4.2.1.1]	rah00910	K01674	carbonic anhydrase [EC:4.2.1.1]	Nitrogen metabolism	4.2.1.1	E8XWN7					_GAP_||PF00194
contig_202060_1_1026_+	1374	0.98843	1.9589	2.0464	7.9257	11.041	7.2917	15.635	19.848	12.285	7.9465	6.3205	4.6907	1.9386	1.9079	1.8851	0	0	0	1.66458	8.7528	15.9227	6.31923	1.91053	0	0.587192	2.00683	3.7897	1.6279	0.026847	0	-0.286948	0	0	1196	1026									KOG1375	Beta tubulin	Cytoskeleton	CELLULAR PROCESSES AND SIGLING	PF00091||_GAP_||PF03953
contig_202225_28_1306_+	1374	2.9653	3.9179	5.116	3.5225	1.6986	2.4306	2.2336	2.2054	2.0474	3.1786	3.1602	2.3453	4.8464	4.7698	4.7128	1.744	1.7735	1.7178	3.99973	2.55057	2.16213	2.8947	4.77633	1.7451	1.07768	0.917849	0.100357	0.475883	0.0670392	0.0278663	-1.07235	0	1	1307	1279	scl:sce7103	hypothetical protein						A9ER91	KOG2254	Predicted endo-1,3-beta-glucase	Carbohydrate transport and metabolism	METABOLISM	PF03639||_GAP_
contig_203082_459_1034_-	1374	5.9306	4.8973	6.1392	7.0451	8.4928	7.2917	2.2336	3.3081	3.0711	5.5626	7.9006	7.036	1.9386	0.95395	1.8851	1.744	1.7735	1.7178	5.6557	7.60987	2.87093	6.83307	1.59255	1.7451	0.665024	0.77452	0.564524	1.18214	0.55369	0.0278663	1.1439	1	0	1320	576													PF00505||_GAP_
contig_203363_1_983_+	1374	1.9769	1.9589	2.0464	2.6419	2.5478	1.6204	3.3504	2.2054	2.0474	0	0.79006	0.78178	3.8771	1.9079	4.7128	3.4881	3.5469	3.4355	1.99407	2.27003	2.5344	0.523947	3.49927	3.49017	0.046207	0.564563	0.711079	0.45377	1.44012	0.0557287	-1.48992	0	1	983	983
contig_205496_69_506_+	1374	3.9537	4.8973	4.0928	6.1644	6.7942	7.2917	7.8176	7.7188	7.166	8.7412	8.6907	7.8178	4.8464	4.7698	4.7128	5.2321	5.3204	6.871	4.3146	6.7501	7.56747	8.41657	4.77633	5.80783	0.509403	0.564942	0.351172	0.519162	0.0670392	0.921787	-0.123557	0	0	506	438									KOG0676	Actin and related proteins	Cytoskeleton	CELLULAR PROCESSES AND SIGLING	PF00022
contig_205849_1_1014_-	1374	6.919	7.8357	6.1392	0	0	0	0	0	0	1.5893	1.5801	2.3453	4.8464	6.6777	3.7702	3.4881	5.3204	3.4355	6.96463	0	0	1.83823	5.0981	4.08133	0.84917	0	0	0.439157	1.47	1.07339	-0.671656	6.96e-07	0.888409	1313	1014	ani:AN7041.2	hypothetical protein
contig_206297_896_1627_-	1374	0	0	0	0	0	0	0	0	0	0	0	0	0	0	0	8.7202	5.3204	8.5888	0	0	0	0	0	7.54313	0	0	0	0	0	1.92606	1.14187	0.998646	5.09e-10	2002	732	mbu:Mbur_1492	von Willebrand factor, type A						Q12VX7					_GAP_||PF13519
contig_2320_1_1010_+	1374	0.98843	0	0	0.88064	0.84928	0	0	0	0	6.3572	3.9503	5.4725	0.96928	0.95395	0.94256	3.4881	3.5469	0	0.329477	0.57664	0	5.26	0.955263	2.345	0.57067	0.499631	0	1.21744	0.0134083	2.03104	-0.018222	0	0	1381	1010	fph:Fphi_0772	3-isopropylmalate dehydrogese (EC:1.1.1.85); K00052 3-isopropylmalate dehydrogese [EC:1.1.1.85]	fph00290||fph01100||fph01110	K00052	3-isopropylmalate dehydrogese [EC:1.1.1.85]	Valine, leucine and isoleucine biosynthesis || C5-Branched dibasic acid metabolism || 2-Oxocarboxylic acid metabolism || Biosynthesis of amino acids	1.1.1.85	B0TW85					_GAP_||PF00180
contig_28152_2121_2519_+	1374	6.919	8.8152	9.2088	13.21	14.438	12.153	16.752	18.746	12.285	8.7412	8.6907	8.5996	7.7543	4.7698	5.6553	1.744	1.7735	1.7178	8.31433	13.267	15.9277	8.67717	6.0598	1.7451	1.22431	1.14357	3.30844	0.0717635	1.53282	0.0278663	0.574461	0.934212	0	2577	399	tps:THAPSDRAFT_bd1545	PSBC; PSBC, photosystem II 44 kDa reaction center protein; K02705 photosystem II CP43 chlorophyll apoprotein	tps01100||tps00195	K02705	photosystem II CP43 chlorophyll apoprotein	Photosynthesis		A0T0T1					PF00421
contig_31723_3942_4424_-	1374	5.9306	6.8563	7.1624	7.9257	8.4928	7.2917	12.285	14.335	13.308	8.7412	9.4807	9.3814	12.601	11.447	14.138	6.9762	7.0938	13.742	6.64977	7.9034	13.3093	9.2011	12.7287	9.27067	0.641346	0.60086	1.025	0.401368	1.35003	3.87273	-0.428543	0	0.661707	4527	483	ppp:PHYPADRAFT_163173	hypothetical protein						A9S6X6	KOG0356	Mitochondrial chaperonin, Cpn60/Hsp60p	Posttranslatiol modification, protein turnover, chaperones	CELLULAR PROCESSES AND SIGLING	PF00118
contig_31871_994_1635_-	1374	2.9653	3.9179	2.0464	4.4032	5.0957	4.8611	1.1168	1.1027	1.0237	10.33	12.641	11.727	10.662	11.447	11.311	5.2321	3.5469	1.7178	2.97653	4.78667	1.08107	11.566	11.14	3.49893	0.935801	0.352199	0.0501787	1.16388	0.419508	1.75764	0.594807	1	0	1636	642									KOG3166	60S ribosomal protein L7A	Translation, ribosomal structure and biogenesis	INFORMATION STORAGE AND PROCESSING	_GAP_||PF01248
contig_31914_1_727_+	1374	1.9769	0.97947	1.0232	0.88064	1.6986	1.6204	2.2336	1.1027	2.0474	3.9733	3.1602	3.1271	4.8464	2.8619	1.8851	3.4881	5.3204	5.1533	1.32652	1.39988	1.79457	3.4202	3.1978	4.65393	0.563667	0.451372	0.606364	0.479284	1.50896	1.01309	0.33856	0.254638	0	3485	727	pti:PHATRDRAFT_36197	hypothetical protein						B7G0N2
contig_32147_570_2090_-	1374	10.873	13.713	10.232	9.687	11.041	12.963	5.584	5.5134	5.1185	2.384	1.5801	1.5636	3.8771	5.7237	3.7702	1.744	1.7735	0	11.606	11.2303	5.4053	1.84257	4.457	1.1725	1.85265	1.64619	0.250872	0.468968	1.0983	1.01552	-0.220491	0	0	2092	1521
contig_32156_124_1053_-	1374	6.919	4.8973	6.1392	4.4032	5.0957	4.051	4.4672	5.5134	4.0948	3.9733	4.7404	3.9089	5.8157	2.8619	2.8277	1.744	0	0	5.98517	4.51663	4.6918	4.20753	3.8351	0.581333	1.01961	0.531507	0.735486	0.462598	1.71534	1.0069	-0.372408	0	0.114409	1296	930													PF03382||_GAP_
contig_32247_1_1954_+	1374	0	0.97947	2.0464	0.88064	0	0	2.2336	2.2054	2.0474	0	0	1.5636	3.8771	2.8619	3.7702	0	1.7735	0	1.00862	0.293547	2.16213	0.5212	3.50307	0.591167	1.02351	0.508438	0.100357	0.902745	0.557833	1.02393	-0.405418	0	0.503133	1955	1954	ckl:CKL_1830 || ckr:CKR_1701	hypothetical protein || hypothetical protein						A5N991
contig_32312_532_873_-	1374	2.9653	3.9179	2.0464	2.6419	3.3971	1.6204	3.3504	3.3081	3.0711	3.1786	3.9503	2.3453	0.96928	1.9079	0.94256	3.4881	3.5469	1.7178	2.97653	2.55313	3.2432	3.15807	1.27325	2.9176	0.935801	0.89167	0.150536	0.802697	0.549788	1.03947	0.6934	1	0	1282	342	ppp:PHYPADRAFT_220863	hypothetical protein						A9TBY0	KOG0841	Multifunctiol chaperone (14-3-3 family)	Posttranslatiol modification, protein turnover, chaperones	CELLULAR PROCESSES AND SIGLING	PF00244
contig_32560_1_2430_+	1374	27.676	25.466	25.58	30.822	30.574	30.787	36.854	39.697	40.948	25.429	26.072	29.708	7.7543	9.5395	6.5979	22.673	21.281	24.049	26.2407	30.7277	39.1663	27.0697	7.9639	22.6677	1.24434	0.134225	2.09795	2.30737	1.48196	1.38401	-0.560174	0	1	2686	2430	pti:PHATRDRAFT_15815	hypothetical protein; K01507 inorganic pyrophosphatase [EC:3.6.1.1]	pti00190	K01507	inorganic pyrophosphatase [EC:3.6.1.1]	Oxidative phosphorylation	3.6.1.1	B7G9Z6					PF03030||_GAP_
contig_3265_1_487_+	1374	3.9537	3.9179	4.0928	3.5225	2.5478	3.2408	0	0	0	3.1786	2.3702	2.3453	0.96928	0.95395	0.94256	0	0	0	3.98813	3.1037	0	2.63137	0.955263	0	0.0923945	0.501605	0	0.474081	0.0134083	0	0.0223102	2.08e-06	0	689	487
contig_32756_139_882_-	1374	0	0.97947	0	0.88064	2.5478	3.2408	3.3504	3.3081	5.1185	3.1786	4.7404	3.9089	3.8771	4.7698	2.8277	0	0	0	0.32649	2.22308	3.92567	3.94263	3.82487	0	0.565497	1.21312	1.03324	0.781446	0.972103	0	0.832598	1	0	882	744	ppp:PHYPADRAFT_211089	hypothetical protein	ppp03010	K02947	small subunit ribosomal protein S10e	Ribosome		A9SDE8	KOG3344	40s ribosomal protein s10	Translation, ribosomal structure and biogenesis	INFORMATION STORAGE AND PROCESSING	_GAP_||PF03501||_GAP_
contig_33666_347_1099_+	1374	1.9769	1.9589	2.0464	2.6419	3.3971	3.2408	8.9344	8.8215	7.166	8.7412	8.6907	8.5996	8.7235	7.6316	9.4256	1.744	1.7735	3.4355	1.99407	3.09327	8.3073	8.67717	8.59357	2.31767	0.046207	0.398631	0.990005	0.0717635	0.90403	0.968184	0.939211	1	0	1266	753									KOG3181	40S ribosomal protein S3	Translation, ribosomal structure and biogenesis	INFORMATION STORAGE AND PROCESSING	PF07650||PF00189||_GAP_
contig_33858_237_1087_-	1374	0	0	0	1.7613	1.6986	0.81019	2.2336	2.2054	2.0474	3.1786	3.1602	3.1271	2.9078	2.8619	1.8851	0	0	0	0	1.42336	2.16213	3.1553	2.5516	0	0	0.531948	0.100357	0.0260973	0.577662	0	1.01911	1	0	1088	851	pti:PHATRDRAFT_30031	Lhcf9; protein fucoxanthin chlorophyll a/c protein						B7G955					_GAP_||PF00504||_GAP_
contig_33869_218_826_-	1374	6.919	5.8768	5.116	7.9257	7.6435	8.9121	11.168	8.8215	7.166	7.1519	7.1106	7.8178	6.785	6.6777	8.483	8.7202	8.8673	6.871	5.9706	8.16043	9.05183	7.3601	7.31523	8.15283	0.905153	0.666079	2.01092	0.396917	1.01274	1.11253	0.64342	1	0	1033	609	nve:NEMVE_v1g167582	hypothetical protein ; K07874 Ras-related protein Rab-1A		K07874	Ras-related protein Rab-1A	Legionellosis		A7S806	KOG0084	GTPase Rab1/YPT1, small G protein superfamily, and related GTP-binding proteins	Sigl transduction mechanisms	CELLULAR PROCESSES AND SIGLING	PF00071||_GAP_
contig_339_1_822_-	1374	6.919	4.8973	6.1392	5.2838	7.6435	4.8611	11.168	9.9242	12.285	3.1786	3.9503	4.6907	12.601	11.447	13.196	8.7202	8.8673	8.5888	5.98517	5.92947	11.1257	3.93987	12.4147	8.72543	1.01961	1.49937	1.18097	0.756104	0.889264	0.139324	-1.203	0	1	1667	822
contig_34013_1_1187_+	1374	0.98843	1.9589	1.0232	0	1.6986	2.4306	5.584	3.3081	6.1423	2.384	1.5801	2.3453	8.7235	6.6777	7.5404	6.9762	3.5469	6.871	1.32351	1.3764	5.01147	2.10313	7.6472	5.79803	0.550538	1.24692	1.50134	0.453373	1.02707	1.95025	0.378631	0.258703	0	1226	1187									KOG0374	Serine/threonine specific protein phosphatase PP1, catalytic subunit	Sigl transduction mechanisms	CELLULAR PROCESSES AND SIGLING	_GAP_||PF00149||_GAP_
contig_34623_96_746_+	1374	4.9422	3.9179	0	5.2838	0	5.6713	10.051	8.8215	8.1897	8.7412	6.3205	8.5996	4.8464	0	6.5979	0	0	5.1533	2.95337	3.6517	9.02073	7.8871	3.81477	1.71777	2.60846	3.16839	0.946509	1.35856	3.41779	2.97526	0.858758	1	0	833	651									KOG0086	GTPase Rab4, small G protein superfamily	Intracellular trafficking, secretion, and vesicular transport	CELLULAR PROCESSES AND SIGLING	PF00071||_GAP_
contig_34654_499_1636_-	1374	0	0	0	0	0	0	0	0	0	0	0	0	16.478	17.171	16.023	15.696	19.508	20.613	0	0	0	0	16.5573	18.6057	0	0	0	0	0.578097	2.5797	0.148804	0	0	1637	1138	olu:OSTLU_26062	MFS family transporter: nitrate; K02575 MFS transporter, NNP family, nitrate/nitrite transporter		K02575	MFS transporter, NNP family, nitrate/nitrite transporter	Nitrogen metabolism		A4S3I1
contig_36095_459_911_-	1374	6.919	8.8152	5.116	3.5225	3.3971	4.051	6.7008	2.2054	3.0711	3.1786	3.9503	3.1271	1.9386	1.9079	3.7702	0	1.7735	1.7178	6.95007	3.65687	3.99243	3.41867	2.5389	1.16377	1.8498	0.34704	2.38512	0.461127	1.06645	1.00824	0.244618	0	0	2606	453	tps:THAPSDRAFT_21175	TKT2; transketolase (EC:2.2.1.1)						B8BTR4					_GAP_||PF02780
contig_36095_965_2532_-	1374	5.9306	5.8768	7.1624	3.5225	5.0957	3.2408	4.4672	3.3081	3.0711	4.7679	3.1602	3.1271	1.9386	1.9079	1.8851	3.4881	3.5469	3.4355	6.32327	3.953	3.61547	3.68507	1.91053	3.49017	0.727208	0.999581	0.747081	0.937907	0.026847	0.0557287	-0.645783	0	1	2606	1568													_GAP_||PF00456||PF02779
contig_36247_267_707_-	1374	5.9306	4.8973	3.0696	0.88064	0.84928	0	0	0	0	0	0	0	0	0	0	0	0	0	4.6325	0.57664	0	0	0	0	1.44876	0.499631	0	0	0	0	0.486632	0.995525	0	774	441
contig_38346_373_936_-	1374	3.9537	3.9179	4.0928	2.6419	1.6986	1.6204	4.4672	6.6161	7.166	7.1519	7.9006	7.8178	6.785	4.7698	5.6553	13.952	8.8673	10.307	3.98813	1.98697	6.0831	7.62343	5.7367	11.0421	0.0923945	0.568535	1.42617	0.410453	1.01006	2.62084	0.340257	0.0118584	0	1218	564									KOG0087	GTPase Rab11/YPT3, small G protein superfamily	Intracellular trafficking, secretion, and vesicular transport	CELLULAR PROCESSES AND SIGLING	PF00071||_GAP_
contig_39559_310_1200_-	1374	7.9075	6.8563	8.1856	1.7613	1.6986	3.2408	1.1168	1.1027	2.0474	5.5626	7.9006	6.2542	5.8157	5.7237	6.5979	8.7202	7.0938	8.5888	7.6498	2.23357	1.4223	6.57247	6.04577	8.13427	0.701118	0.872853	0.541398	1.20105	0.480369	0.903463	0.635379	1	0	1201	891	pti:PHATRDRAFT_9266	hypothetical protein						B7FPE0					_GAP_||PF13587||PF01965
contig_39648_199_797_-	1374	16.803	15.671	14.325	14.09	15.287	15.394	14.518	14.335	15.356	6.3572	6.3205	7.8178	1.9386	0.95395	2.8277	1.744	3.5469	3.4355	15.5997	14.9237	14.7363	6.83183	1.90675	2.9088	1.24054	0.723956	0.544392	0.854069	0.937281	1.01028	0.35938	0.0659965	0	797	599									KOG0027	Calmodulin and related proteins (EF-Hand superfamily)	Sigl transduction mechanisms	CELLULAR PROCESSES AND SIGLING	_GAP_||PF13499||PF13202||PF00036||_GAP_
contig_40121_257_760_-	1374	7.9075	8.8152	8.1856	6.1644	6.7942	6.4815	2.2336	0	2.0474	3.9733	3.1602	4.6907	0	0	0	0	0	0	8.30277	6.48003	1.427	3.9414	0	0	0.465055	0.314903	1.23932	0.765749	0	0	0.622385	1	0	959	504									KOG0381	HMG box-containing protein	General function prediction only	POORLY CHARACTERIZED	_GAP_||PF00505||_GAP_
contig_40152_125_693_-	1374	0.98843	0	0	0	0	0	1.1168	0	1.0237	0	0	0	3.8771	6.6777	3.7702	0	0	0	0.329477	0	0.7135	0	4.775	0	0.57067	0	0.61966	0	1.64865	0	0.992555	1	0	693	569									KOG4154	Arginine-rich protein	General function prediction only	POORLY CHARACTERIZED	_GAP_||PF10208
contig_41489_60_407_+	1374	4.9422	3.9179	5.116	5.2838	5.9449	6.4815	2.2336	0	1.0237	7.1519	7.1106	7.036	4.8464	6.6777	6.5979	6.9762	3.5469	1.7178	4.6587	5.9034	1.08577	7.0995	6.04067	4.0803	0.64741	0.599928	1.11809	0.0587419	1.03503	2.66947	1.14316	1	0	672	348									KOG1790	60s ribosomal protein L34	Translation, ribosomal structure and biogenesis	INFORMATION STORAGE AND PROCESSING	PF01199
contig_43877_100_672_-	1374	3.9537	2.9384	4.0928	5.2838	6.7942	6.4815	10.051	8.8215	9.2134	15.893	16.591	15.636	13.57	14.309	13.196	5.2321	5.3204	8.5888	3.66163	6.1865	9.36197	16.04	13.6917	6.38043	0.630188	0.797243	0.62807	0.494179	0.566387	1.91301	0.99154	1	0	785	573	olu:OSTLU_33583	RPL18; Ribosomal protein L18, component of cytosolic 80S ribosome and 60S large subunit; K02883 large subunit ribosomal protein L18e	olu03010	K02883	large subunit ribosomal protein L18e	Ribosome		A4S2V6	KOG1714	60s ribosomal protein L18	Translation, ribosomal structure and biogenesis	INFORMATION STORAGE AND PROCESSING	PF00828||_GAP_
contig_46340_1_738_+	1374	5.9306	6.8563	5.116	5.2838	4.2464	3.2408	3.3504	2.2054	3.0711	6.3572	6.3205	5.4725	1.9386	1.9079	1.8851	3.4881	5.3204	3.4355	5.96763	4.257	2.87563	6.05007	1.91053	4.08133	0.870741	1.02154	0.597002	0.500524	0.026847	1.07339	0.475674	0.934709	0	937	738	tps:THAPSDRAFT_38924	hypothetical protein						B8CGL4	KOG2241	tR-binding protein	Translation, ribosomal structure and biogenesis	INFORMATION STORAGE AND PROCESSING	_GAP_||PF01588||_GAP_
contig_47464_334_960_-	1374	6.919	6.8563	8.1856	6.1644	5.9449	6.4815	7.8176	6.6161	7.166	3.1786	3.9503	3.9089	9.6928	8.5856	9.4256	3.4881	3.5469	0	7.3203	6.19693	7.1999	3.67927	9.23467	2.345	0.750027	0.269775	0.601467	0.434084	0.577767	2.03104	-0.105404	0	0	998	627
contig_49582_1_898_+	1374	1.9769	1.9589	1.0232	4.4032	4.2464	4.8611	6.7008	4.4108	7.166	3.9733	3.9503	4.6907	7.7543	6.6777	9.4256	1.744	1.7735	0	1.653	4.50357	6.09253	4.20477	7.95253	1.1725	0.545497	0.319404	1.47488	0.420988	1.38463	1.01552	0.502988	0.912362	0	1023	898	rha:RHA1_ro07071	enoyl-CoA hydratase; K01692 enoyl-CoA hydratase [EC:4.2.1.17]	rha00930||rha00650||rha00903||rha00640||rha01100||rha00362||rha00071||rha00410||rha00380||rha00310||rha00280||rha00281||rha00627||rha01120||rha01110	K01692	enoyl-CoA hydratase [EC:4.2.1.17]	Fatty acid degradation || Valine, leucine and isoleucine degradation || Geraniol degradation || Lysine degradation || Phenylalanine metabolism || Benzoate degradation || Tryptophan metabolism || beta-Alanine metabolism || Aminobenzoate degradation || Propanoate metabolism || Butanoate metabolism || Limonene and pinene degradation || Caprolactam degradation || Fatty acid metabolism	4.2.1.17	Q0S0V1					_GAP_||PF00378
contig_538_50_946_+	1374	4.9422	4.8973	6.1392	2.6419	1.6986	3.2408	2.2336	2.2054	2.0474	2.384	3.1602	1.5636	3.8771	3.8158	3.7702	5.2321	5.3204	6.871	5.32623	2.5271	2.16213	2.36927	3.82103	5.80783	0.704408	0.777483	0.100357	0.798402	0.0536418	0.921787	0.244065	2.31e-05	0	1105	897	tps:THAPSDRAFT_3883	hypothetical protein						B8BW83
contig_55530_54_2745_+	1374	0.98843	0.97947	0	1.7613	1.6986	1.6204	3.3504	2.2054	3.0711	2.384	3.1602	2.3453	3.8771	4.7698	3.7702	3.4881	5.3204	3.4355	0.655967	1.69343	2.87563	2.62983	4.13903	4.08133	0.568101	0.0705919	0.597002	0.459718	0.548869	1.07339	-1.20496	0	1	4501	2692													_GAP_||PF01457||_GAP_
contig_55536_1_935_+	1374	0	0	0	0	0	0	0	0	0	0	0	0	3.8771	3.8158	4.7128	0	1.7735	3.4355	0	0	0	0	4.13523	1.73633	0	0	0	0	0.501126	1.71805	0.747993	0.992435	0	1252	935	mth:MTH944	hypothetical protein						O27027
contig_55542_2977_3789_-	1374	0.98843	0.97947	1.0232	0.88064	1.6986	0.81019	2.2336	2.2054	5.1185	2.384	3.1602	2.3453	4.8464	2.8619	3.7702	1.744	0	0	0.997033	1.12981	3.18583	2.62983	3.82617	0.581333	0.0230996	0.493844	1.6738	0.459718	0.993433	1.0069	-0.447009	0	0.833827	3812	813	ent:Ent638_3913	glutathione reductase (EC:1.8.1.7); K00383 glutathione reductase (DPH) [EC:1.8.1.7]	ent00480	K00383	glutathione reductase (DPH) [EC:1.8.1.7]	Glutathione metabolism || Thyroid hormone synthesis	1.8.1.7	A4WFT8					PF07992
contig_55562_154_1118_+	1374	0.98843	1.9589	3.0696	2.6419	0.84928	6.4815	3.3504	3.3081	2.0474	1.5893	3.1602	2.3453	3.8771	5.7237	6.5979	1.744	0	1.7178	2.00564	3.32423	2.90197	2.36493	5.39957	1.15393	1.04137	2.87744	0.740379	0.785634	1.38906	0.999421	0.194053	0.00072245	0	1402	965									KOG0525	Branched chain alpha-keto acid dehydrogese E1, beta subunit	Energy production and conversion	METABOLISM	PF02779||PF02780
contig_55590_167_799_-	1374	5.9306	5.8768	5.116	7.9257	9.342	7.2917	10.051	11.027	9.2134	9.5358	11.061	9.3814	6.785	8.5856	7.5404	5.2321	5.3204	6.871	5.64113	8.18647	10.0971	9.99273	7.637	5.80783	0.455574	1.04973	0.90768	0.928362	0.904178	0.921787	1.60063	1	0	871	633	tps:THAPSDRAFT_6139	hypothetical protein						B8C5N8					_GAP_||PF00504
contig_55808_1356_2371_-	1374	3.9537	3.9179	2.0464	2.6419	3.3971	2.4306	2.2336	1.1027	1.0237	5.5626	3.9503	4.6907	2.9078	2.8619	1.8851	3.4881	3.5469	3.4355	3.306	2.8232	1.45333	4.73453	2.5516	3.49017	1.09099	0.508117	0.676884	0.807043	0.577662	0.0557287	0.0119031	0	0	2519	1016	olu:OSTLU_39605	hypothetical protein; K08568 cathepsin X [EC:3.4.18.1]		K08568	cathepsin X [EC:3.4.18.1]	Lysosome	3.4.18.1	A4RRS0	KOG1543	Cysteine proteise Cathepsin L	Posttranslatiol modification, protein turnover, chaperones	CELLULAR PROCESSES AND SIGLING	_GAP_||PF00112||_GAP_
contig_55933_50_1093_+	1374	32.618	29.384	31.719	33.464	30.574	34.028	37.971	36.389	29.688	17.482	16.591	16.417	12.601	11.447	12.253	0	1.7735	1.7178	31.2403	32.6887	34.6827	16.83	12.1003	1.16377	1.66929	1.85294	4.39724	0.571312	0.591954	1.00824	-6.04889	0	1	1833	1044
contig_56138_1_798_+	1374	11.861	9.7947	13.302	10.568	10.191	11.343	1.1168	0	1.0237	8.7412	7.1106	7.8178	12.601	13.355	13.196	12.208	17.735	17.178	11.6526	10.7007	0.7135	7.88987	13.0507	15.707	1.76292	0.587347	0.61966	0.817685	0.397455	3.04299	0.534789	0.895287	0	933	798
contig_56140_111_680_+	1374	0	0	0	0.88064	0	0.81019	0	0	0	3.9733	4.7404	4.6907	2.9078	1.9079	2.8277	0	0	0	0	0.56361	0	4.46813	2.5478	0	0	0.48937	0	0.429258	0.555615	0	1.05395	1	0	921	570									KOG3353	60S ribosomal protein L22	Translation, ribosomal structure and biogenesis	INFORMATION STORAGE AND PROCESSING	PF00237||_GAP_
contig_56163_113_775_-	1374	4.9422	5.8768	4.0928	0.88064	3.3971	4.051	4.4672	3.3081	4.0948	4.7679	3.9503	5.4725	5.8157	4.7698	4.7128	5.2321	5.3204	5.1533	4.9706	2.77625	3.9567	4.73023	5.09943	5.23527	0.892339	1.67388	0.591762	0.761799	0.62096	0.083595	0.768461	1	0	1398	663	pti:PHATRDRAFT_7173	hypothetical protein; K00794 6,7-dimethyl-8-ribityllumazine synthase [EC:2.5.1.78]	pti01100||pti00740	K00794	6,7-dimethyl-8-ribityllumazine synthase [EC:2.5.1.78]	Riboflavin metabolism	2.5.1.78	B7FWC7	KOG3243	6,7-dimethyl-8-ribityllumazine synthase	Coenzyme transport and metabolism	METABOLISM	_GAP_||PF00885||_GAP_
contig_56462_165_569_-	1374	10.873	9.7947	10.232	7.0451	6.7942	7.2917	8.9344	6.6161	8.1897	4.7679	7.1106	6.2542	5.8157	5.7237	6.5979	6.9762	7.0938	8.5888	10.2999	7.04367	7.9134	6.04423	6.04577	7.55293	0.542347	0.248753	1.18359	1.18538	0.480369	0.899012	0.592367	1	0	807	405									KOG1772	Vacuolar H+-ATPase V1 sector, subunit G	Energy production and conversion	METABOLISM	PF03179
contig_56839_231_2610_-	1374	0	0.97947	1.0232	0.88064	0.84928	2.4306	2.2336	2.2054	1.0237	5.5626	4.7404	3.1271	5.8157	3.8158	4.7128	0	1.7735	0	0.667557	1.38684	1.8209	4.4767	4.78143	0.591167	0.578534	0.904059	0.690539	1.23898	1.00171	1.02393	-0.34104	0	0.0407119	2642	2380													PF00933||_GAP_||PF01915||_GAP_||PF14310
contig_56903_1_951_-	1374	2.9653	2.9384	3.0696	3.5225	3.3971	3.2408	3.3504	4.4108	5.1185	4.7679	3.9503	4.6907	6.785	3.8158	4.7128	8.7202	7.0938	6.871	2.9911	3.3868	4.29323	4.46963	5.10453	7.56167	0.0693007	0.141132	0.889894	0.451409	1.52287	1.00948	-1.36795	0	1	1426	951
contig_57965_189_488_-	1374	1.9769	1.9589	2.0464	2.6419	2.5478	0.81019	3.3504	3.3081	2.0474	2.384	3.9503	3.9089	4.8464	3.8158	4.7128	5.2321	5.3204	3.4355	1.99407	1.99996	2.90197	3.4144	4.45833	4.66267	0.046207	1.03145	0.740379	0.892593	0.560445	1.06367	1.49115	1	0	556	300	cre:CHLREDRAFT_55098	CPN10; chaperonin 10; K04078 chaperonin GroES		K04078	chaperonin GroES			A8IDN1	KOG1641	Mitochondrial chaperonin	Posttranslatiol modification, protein turnover, chaperones	CELLULAR PROCESSES AND SIGLING	PF00166
contig_59005_236_864_-	1374	1.9769	1.9589	2.0464	1.7613	1.6986	1.6204	1.1168	1.1027	0	1.5893	1.5801	1.5636	1.9386	4.7698	2.8277	0	1.7735	1.7178	1.99407	1.69343	0.739833	1.57767	3.1787	1.16377	0.046207	0.0705919	0.640753	0.0130216	1.44787	1.00824	0.166018	9.01e-05	0	864	629	tps:THAPSDRAFT_34104	hypothetical protein; K01802 peptidylprolyl isomerase [EC:5.2.1.8]		K01802	peptidylprolyl isomerase [EC:5.2.1.8]		5.2.1.8	B8C305	KOG0552	FKBP-type peptidyl-prolyl cis-trans isomerase	Posttranslatiol modification, protein turnover, chaperones	CELLULAR PROCESSES AND SIGLING	_GAP_||PF00254||_GAP_
contig_60680_166_820_-	1374	0	0	0	0	0	0	0	0	0	0.79465	0.79006	0	0.96928	0.95395	0.94256	5.2321	1.7735	5.1533	0	0	0	0.528237	0.955263	4.05297	0	0	0	0.457472	0.0134083	1.97447	1.27933	0.999568	2.83e-11	820	655
contig_62673_75_722_-	1374	5.9306	7.8357	7.1624	7.0451	6.7942	6.4815	7.8176	5.5134	7.166	15.098	17.381	17.199	9.6928	9.5395	9.4256	0	1.7735	3.4355	6.97623	6.7736	6.83233	16.5593	9.55263	1.73633	0.966098	0.282364	1.18779	1.26882	0.134083	1.71805	0.93858	1	0	802	648									KOG1694	60s ribosomal protein L6	Translation, ribosomal structure and biogenesis	INFORMATION STORAGE AND PROCESSING	_GAP_||PF01159
contig_63273_96_794_+	1374	4.9422	5.8768	4.0928	6.1644	6.7942	5.6713	5.584	5.5134	4.0948	3.1786	3.9503	3.1271	0	0	0	0	0	0	4.9706	6.20997	5.06407	3.41867	0	0	0.892339	0.562835	0.840151	0.461127	0	0	-0.201924	0	0	1029	699	cre:CHLREDRAFT_116375	NCR2; DPH-cytochrome P450 reductase; K00327 DPH-ferrihemoprotein reductase [EC:1.6.2.4]		K00327	DPH-ferrihemoprotein reductase [EC:1.6.2.4]		1.6.2.4	A8HME7	KOG1158	DP/FAD dependent oxidoreductase	Energy production and conversion	METABOLISM	PF00258||_GAP_
contig_63334_125_715_-	1374	2.9653	8.8152	4.0928	6.1644	5.0957	5.6713	5.584	6.6161	3.0711	5.5626	3.1602	3.9089	1.9386	1.9079	1.8851	5.2321	5.3204	5.1533	5.2911	5.6438	5.0904	4.21057	1.91053	5.23527	3.10359	0.53488	1.82332	1.22928	0.026847	0.083595	0.671704	1	0	788	591									KOG0393	Ras-related small GTPase, Rho type	General function prediction only	POORLY CHARACTERIZED	PF00071
contig_65989_193_509_-	1374	3.9537	3.9179	3.0696	0	0	0	1.1168	0	2.0474	0.79465	0.79006	0.78178	1.9386	2.8619	1.8851	0	1.7735	0	3.64707	0	1.05473	0.78883	2.22853	0.591167	0.500421	0	1.02511	0.00652257	0.549164	1.02393	0.538304	0.93408	0	509	317									KOG3460	Small nuclear ribonucleoprotein (snRNP) LSM3	R processing and modification	INFORMATION STORAGE AND PROCESSING	PF01423
contig_67956_1_476_+	1374	0	0.97947	0	1.7613	1.6986	3.2408	2.2336	1.1027	2.0474	2.384	1.5801	2.3453	3.8771	3.8158	2.8277	0	1.7735	0	0.32649	2.23357	1.79457	2.10313	3.50687	0.591167	0.565497	0.872853	0.606364	0.453373	0.588974	1.02393	-0.0517302	0	0	796	476	fre:Franean1_1822	cyclase/dehydrase						A8LFF7					PF10604
contig_67970_221_928_-	1374	2.9653	1.9589	3.0696	1.7613	2.5478	2.4306	2.2336	3.3081	3.0711	1.5893	1.5801	1.5636	1.9386	1.9079	1.8851	3.4881	3.5469	3.4355	2.6646	2.24657	2.87093	1.57767	1.91053	3.49017	0.613375	0.424319	0.564524	0.0130216	0.026847	0.0557287	0.550621	0.940317	0	1355	708	slt:Slit_2960	dihydroorotase, homodimeric type (EC:3.5.2.3); K01465 dihydroorotase [EC:3.5.2.3]	slt00240||slt01100	K01465	dihydroorotase [EC:3.5.2.3]	Pyrimidine metabolism	3.5.2.3	D5CQG4					PF01979||_GAP_
contig_69184_1_547_+	1374	0	0	0	0	0	0	0	0	0	0	0	0	0	1.9079	0.94256	5.2321	7.0938	5.1533	0	0	0	0	0.950153	5.8264	0	0	0	0	0.953973	1.09831	-2.61827	0	1	547	547
contig_74090_1_515_-	1374	0	0	0	0	0	0	0	0	0	0	0.79006	0.78178	2.9078	3.8158	2.8277	5.2321	5.3204	5.1533	0	0	0	0.523947	3.18377	5.23527	0	0	0	0.45377	0.54882	0.083595	-1.61467	0	1	515	515
contig_81401_19_936_+	1374	1.9769	1.9589	2.0464	1.7613	0.84928	1.6204	3.3504	3.3081	4.0948	1.5893	1.5801	1.5636	0	0	0	0	0	0	1.99407	1.41033	3.58443	1.57767	0	0	0.046207	0.490962	0.442496	0.0130216	0	0	-0.793286	0	1	1093	918
contig_81496_55_1622_+	1374	0	0	0	0	0	0	1.1168	0	1.0237	5.5626	3.1602	4.6907	3.8771	5.7237	4.7128	13.952	19.508	15.46	0	0	0.7135	4.47117	4.7712	16.3067	0	0	0.61966	1.21615	0.924684	2.87314	0.406082	0.498967	0	1710	1568													_GAP_||PF00171
contig_81550_150_1882_-	1374	0	0	0	1.7613	3.3971	0.81019	1.1168	0	1.0237	0	0.79006	0.78178	3.8771	5.7237	5.6553	0	0	0	0	1.98953	0.7135	0.523947	5.08537	0	0	1.30847	0.61966	0.45377	1.04695	0	0.284561	0	0	2845	1733	olu:OSTLU_52010	hypothetical protein; K03234 elongation factor 2		K03234	elongation factor 2	AMPK sigling pathway || Oxytocin sigling pathway		A4SB22	KOG0469	Elongation factor 2	Translation, ribosomal structure and biogenesis	INFORMATION STORAGE AND PROCESSING	_GAP_||PF03144||PF14492||_GAP_||PF03764||PF00679
contig_81586_182_1072_+	1374	0	0	0	0	0	0	0	0	0	0	0	0	8.7235	11.447	8.483	15.696	12.414	12.024	0	0	0	0	9.55117	13.378	0	0	0	0	1.64624	2.0169	-0.638653	0	0.999995	2332	891	ppp:PHYPADRAFT_133761	hypothetical protein						A9SR55					_GAP_||PF07690
contig_81593_209_919_-	1374	8.8959	12.733	12.278	10.568	11.041	12.153	10.051	11.027	10.237	6.3572	5.5304	5.4725	0	0	0	0	0	0	11.3023	11.254	10.4383	5.7867	0	0	2.09638	0.813685	0.518214	0.494915	0	0	-4.85366	0	1	1877	711	pti:PHATRDRAFT_47674	ISIP3; iron starvation induced protein						B7G4H8					_GAP_||PF03713||_GAP_
contig_81593_985_1876_-	1374	13.838	11.754	13.302	16.732	13.588	13.773	12.285	12.13	11.261	6.3572	5.5304	7.036	0.96928	0.95395	0.94256	0	0	0	12.9647	14.6977	11.892	6.30787	0.955263	0	1.08218	1.76421	0.55193	0.754011	0.0134083	0	-5.04897	0	1	1877	892	pti:PHATRDRAFT_47674	ISIP3; iron starvation induced protein						B7G4H8					_GAP_||PF03713||_GAP_
contig_81774_1383_2980_-	1374	9.8843	10.774	9.2088	11.448	11.041	12.153	15.635	19.848	17.403	7.1519	7.9006	7.8178	5.8157	4.7698	5.6553	5.2321	3.5469	3.4355	9.9557	11.5473	17.6287	7.62343	5.4136	4.0715	0.785039	0.562616	2.11555	0.410453	0.563286	1.00665	-0.574859	0	1	3715	1598	ppp:PHYPADRAFT_223402	hypothetical protein						A9TLE5	KOG2348	Urea transporter	Amino acid transport and metabolism	METABOLISM
contig_81993_204_893_-	1374	1.9769	1.9589	1.0232	2.6419	3.3971	3.2408	3.3504	2.2054	3.0711	3.1786	2.3702	1.5636	4.8464	4.7698	4.7128	3.4881	1.7735	3.4355	1.653	3.09327	2.87563	2.3708	4.77633	2.89903	0.545497	0.398631	0.597002	0.8075	0.0670392	0.975095	0.757247	1	0	1915	690
contig_81996_1328_2035_-	1374	2.9653	2.9384	3.0696	3.5225	4.2464	3.2408	4.4672	5.5134	4.0948	5.5626	4.7404	5.4725	2.9078	2.8619	2.8277	0	0	3.4355	2.9911	3.6699	4.6918	5.2585	2.8658	1.14517	0.0693007	0.518751	0.735486	0.450944	0.0401922	1.98349	0.454343	0.999454	0	2308	708	tps:THAPSDRAFT_7916	FCP_2; hypothetical protein						B8C7W5					_GAP_||PF00504
contig_82097_995_1799_-	1374	19.769	21.548	20.464	18.493	18.684	20.255	8.9344	7.7188	8.1897	5.5626	6.3205	7.036	9.6928	8.5856	9.4256	0	0	0	20.5937	19.144	8.28097	6.30637	9.23467	0	0.89656	0.966882	0.612918	0.736802	0.577767	0	-1.76453	0	1	1800	805	pti:PHATRDRAFT_54708	hypothetical protein						B7G3P0
contig_82293_1055_1615_+	1374	10.873	12.733	13.302	7.9257	6.7942	7.2917	1.1168	1.1027	1.0237	7.9465	8.6907	9.3814	5.8157	6.6777	5.6553	5.2321	8.8673	8.5888	12.3027	7.3372	1.08107	8.67287	6.04957	7.56273	1.27039	0.567121	0.0501787	0.717616	0.54986	2.02319	0.24905	1.19e-06	0	1963	561
contig_82403_255_956_-	1374	6.919	7.8357	4.0928	3.5225	4.2464	4.8611	1.1168	0	2.0474	6.3572	5.5304	3.9089	0.96928	0.95395	1.8851	5.2321	1.7735	3.4355	6.2825	4.21	1.05473	5.2655	1.26944	3.48037	1.95094	0.670042	1.02511	1.24546	0.533229	1.72974	0.417195	0.726672	0	1064	702									KOG0841	Multifunctiol chaperone (14-3-3 family)	Posttranslatiol modification, protein turnover, chaperones	CELLULAR PROCESSES AND SIGLING	PF00244
contig_82543_226_1868_-	1374	0.98843	0.97947	2.0464	6.1644	7.6435	10.532	3.3504	3.3081	4.0948	0.79465	0	0	2.9078	1.9079	0.94256	3.4881	3.5469	3.4355	1.3381	8.1133	3.58443	0.264883	1.91942	3.49017	0.613422	2.22138	0.442496	0.458791	0.982671	0.0557287	-4.53107	0	1	2780	1643
contig_83411_1_2462_+	1374	0	0.97947	1.0232	9.687	8.4928	7.2917	1.1168	2.2054	4.0948	1.5893	0.79006	0.78178	5.8157	6.6777	2.8277	0	0	0	0.667557	8.4905	2.47233	1.05371	5.10703	0	0.578534	1.19765	1.50684	0.46385	2.02047	0	-0.380794	0	0.16549	2811	2462
contig_83527_1079_1594_-	1374	5.9306	5.8768	5.116	4.4032	5.0957	6.4815	5.584	5.5134	6.1423	7.1519	6.3205	5.4725	5.8157	5.7237	6.5979	12.208	8.8673	12.024	5.64113	5.3268	5.74657	6.31497	6.04577	11.0331	0.455574	1.05825	0.344528	0.839714	0.480369	1.87789	0.813818	1	0	1665	516	tel:tlr0298	rplL; 50S ribosomal protein L7/L12; K02935 large subunit ribosomal protein L7/L12	tel03010	K02935	large subunit ribosomal protein L7/L12	Ribosome		Q8DM25					_GAP_||PF00542
contig_83695_1_1521_+	1374	0	0	0	0.88064	0.84928	1.6204	6.7008	7.7188	8.1897	2.384	2.3702	2.3453	0	0	0	0	0	0	0	1.11677	7.53643	2.3665	0	0	0	0.436435	0.761018	0.0196135	0	0	-0.122688	0	0	1522	1521	ppp:PHYPADRAFT_108065	hypothetical protein; K04079 molecular chaperone HtpG	ppp04141	K04079	molecular chaperone HtpG	Protein processing in endoplasmic reticulum || PI3K-Akt sigling pathway || Antigen processing and presentation || NOD-like receptor sigling pathway || Plant-pathogen interaction || Progesterone-mediated oocyte maturation || Estrogen sigling pathway || Pathways in cancer || Prostate cancer		A9TFM2	KOG0019	Molecular chaperone (HSP90 family)	Posttranslatiol modification, protein turnover, chaperones	CELLULAR PROCESSES AND SIGLING	PF02518||PF00183
contig_83865_297_854_-	1374	0	0	0	0	0	0	0	0	0	0	0	0	0.96928	0.95395	1.8851	12.208	10.641	10.307	0	0	0	0	1.26944	11.052	0	0	0	0	0.533229	1.01496	0.668305	0.859596	1.51e-05	940	558	mbu:Mbur_1492	von Willebrand factor, type A						Q12VX7					PF13519
contig_84194_219_2598_-	1374	2.9653	1.9589	2.0464	4.4032	5.0957	4.8611	3.3504	4.4108	4.0948	0	0	0	0	0	0	0	0	0	2.32353	4.78667	3.952	0	0	0	0.557506	0.352199	0.544432	0	0	0	-5.99455	0	1	2656	2380
contig_84461_217_450_+	1374	1.9769	1.9589	2.0464	2.6419	1.6986	1.6204	1.1168	0	0	2.384	0.79006	2.3453	1.9386	1.9079	0	3.4881	3.5469	3.4355	1.99407	1.98697	0.372267	1.83979	1.28217	3.49017	0.046207	0.568535	0.644785	0.909296	1.11049	0.0557287	0.802686	0.992108	4.9e-13	669	234	cre:CHLREDRAFT_196925	AHD1; bifunctiol aspartate kise/homoserine dehydrogese (EC:2.7.2.4); K12524 bifunctiol aspartokise / homoserine dehydrogese 1 [EC:2.7.2.4 1.1.1.3]	cre00300||cre01110||cre01100||cre00260||cre00270	K12524	bifunctiol aspartokise / homoserine dehydrogese 1 [EC:2.7.2.4 1.1.1.3]	Glycine, serine and threonine metabolism || Cysteine and methionine metabolism || Lysine biosynthesis || Biosynthesis of amino acids	2.7.2.4||1.1.1.3	A8J1S7	KOG0455	Homoserine dehydrogese	Amino acid transport and metabolism	METABOLISM	PF00742
contig_85307_195_495_-	1374	7.9075	6.8563	7.1624	6.1644	6.7942	8.1019	3.3504	4.4108	5.1185	8.7412	7.9006	7.036	7.7543	9.5395	6.5979	12.208	14.188	13.742	7.30873	7.02017	4.29323	7.8926	7.9639	13.3793	0.540662	0.988318	0.889894	0.852628	1.48196	1.03863	1.03016	1	0	495	301									KOG2670	Enolase	Carbohydrate transport and metabolism	METABOLISM	PF00113
contig_85692_1_396_+	1374	2.9653	3.9179	3.0696	1.7613	2.5478	0.81019	0	0	0	1.5893	1.5801	1.5636	0	0	0	0	0	0	3.3176	1.70643	0	1.57767	0	0	0.522484	0.870104	0	0.0130216	0	0	1.20002	1	0	396	396
contig_86251_1_607_+	1374	0.98843	2.9384	2.0464	3.5225	5.9449	3.2408	3.3504	1.1027	4.0948	2.384	1.5801	2.3453	5.8157	4.7698	3.7702	1.744	1.7735	1.7178	1.99108	4.23607	2.8493	2.10313	4.78523	1.7451	0.976161	1.48658	1.55772	0.453373	1.02284	0.0278663	-0.938789	0	1	607	607
contig_87746_1_1629_+	1374	3.9537	2.9384	3.0696	3.5225	3.3971	4.8611	2.2336	4.4108	3.0711	1.5893	0.79006	0.78178	2.9078	2.8619	2.8277	0	0	0	3.32057	3.9269	3.2385	1.05371	2.8658	0	0.55222	0.811467	1.09821	0.46385	0.0401922	0	0.300762	2.82e-05	0	1898	1629
contig_88066_1_926_+	1374	6.919	5.8768	6.1392	6.1644	5.9449	4.8611	2.2336	2.2054	5.1185	4.7679	5.5304	4.6907	2.9078	2.8619	3.7702	0	0	0	6.31167	5.6568	3.18583	4.99633	3.17997	0	0.542083	0.697781	1.6738	0.464123	0.511672	0	0.175223	0.00363156	0	1223	926	tps:THAPSDRAFT_31636	aldose-1-epimerase; K01792 glucose-6-phosphate 1-epimerase [EC:5.1.3.15]	tps01100||tps01110||tps00010	K01792	glucose-6-phosphate 1-epimerase [EC:5.1.3.15]	Glycolysis / Gluconeogenesis	5.1.3.15	B8BQI4	KOG1594	Uncharacterized enzymes related to aldose 1-epimerase	Carbohydrate transport and metabolism	METABOLISM	_GAP_||PF01263
contig_88103_1_400_-	1374	0	0	0	0	0	0	0	0	0	0	0	0	1.9386	2.8619	1.8851	12.208	10.641	13.742	0	0	0	0	2.22853	12.197	0	0	0	0	0.549164	1.55053	-0.173595	0.0436896	0.2596	400	400	bla:BLA_0249	rhs family protein						B8DVQ0					PF13519
contig_8990_451_1898_-	1374	0.98843	0	0	1.7613	0.84928	1.6204	2.2336	0	2.0474	6.3572	4.7404	6.2542	0	0	0	6.9762	7.0938	10.307	0.329477	1.41033	1.427	5.78393	0	8.12567	0.57067	0.490962	1.23932	0.905193	0	1.89	0.147836	0	0	1899	1448	ppp:PHYPADRAFT_197330	hypothetical protein; K00600 glycine hydroxymethyltransferase [EC:2.1.2.1]	ppp01110||ppp00460||ppp00670||ppp00260||ppp01100	K00600	glycine hydroxymethyltransferase [EC:2.1.2.1]	Glycine, serine and threonine metabolism || Cyanoamino acid metabolism || Glyoxylate and dicarboxylate metabolism || One carbon pool by folate || Methane metabolism || Carbon metabolism || Biosynthesis of amino acids	2.1.2.1	A9TQS1	KOG2467	Glycine/serine hydroxymethyltransferase	Amino acid transport and metabolism	METABOLISM	_GAP_||PF00464||_GAP_
contig_9022_164_556_-	1374	1.9769	1.9589	1.0232	3.5225	4.2464	4.051	4.4672	4.4108	5.1185	3.1786	3.9503	4.6907	4.8464	5.7237	5.6553	3.4881	0	0	1.653	3.93997	4.6655	3.93987	5.40847	1.1627	0.545497	0.374505	0.393322	0.756104	0.487964	2.01386	0.885155	1	0	646	393	tan:TA13900 || tpv:TP02_0064	40s ribosomal protein s15a; K02957 small subunit ribosomal protein S15Ae || 40S ribosomal protein S15a; K02957 small subunit ribosomal protein S15Ae							KOG1754	40S ribosomal protein S15/S22	Translation, ribosomal structure and biogenesis	INFORMATION STORAGE AND PROCESSING	PF00410
contig_90269_1_1510_+	1374	9.8843	13.713	13.302	11.448	11.041	10.532	16.752	15.438	14.332	17.482	15.011	15.636	9.6928	10.493	10.368	1.744	3.5469	5.1533	12.2998	11.007	15.5073	16.043	10.1846	3.4814	2.10193	0.458946	1.21149	1.28479	0.430473	1.70559	0.195992	0	0	1805	1510	ppp:PHYPADRAFT_106783	hypothetical protein; K00382 dihydrolipoamide dehydrogese [EC:1.8.1.4]	ppp00620||ppp01110||ppp00260||ppp00010||ppp00280||ppp00020||ppp01100	K00382	dihydrolipoamide dehydrogese [EC:1.8.1.4]	Glycolysis / Gluconeogenesis || Citrate cycle (TCA cycle) || Glycine, serine and threonine metabolism || Valine, leucine and isoleucine degradation || Pyruvate metabolism || Carbon metabolism	1.8.1.4	A9SNH9	KOG1335	Dihydrolipoamide dehydrogese	Energy production and conversion	METABOLISM	_GAP_||PF07992||PF02852
contig_9042_282_953_-	1374	0	0.97947	0	0	0	0	2.2336	1.1027	3.0711	2.384	1.5801	1.5636	3.8771	2.8619	4.7128	5.2321	3.5469	3.4355	0.32649	0	2.1358	1.84257	3.81727	4.0715	0.565497	0	0.987838	0.468968	0.9269	1.00665	0.80399	1	0	1311	672									KOG0374	Serine/threonine specific protein phosphatase PP1, catalytic subunit	Sigl transduction mechanisms	CELLULAR PROCESSES AND SIGLING	PF00149||_GAP_
contig_93004_1_321_-	1374	0	0	0	0	0	0	0	0	0	0.79465	0	0	3.8771	2.8619	2.8277	8.7202	7.0938	6.871	0	0	0	0.264883	3.1889	7.56167	0	0	0	0.458791	0.596244	1.00948	0.961345	0.92795	0.000212321	321	321
contig_932_82_666_+	1374	10.873	10.774	10.232	7.0451	7.6435	8.1019	1.1168	0	0	11.92	11.061	11.727	3.8771	4.7698	1.8851	3.4881	5.3204	1.7178	10.6263	7.59683	0.372267	11.5693	3.51067	3.50877	0.345071	0.529943	0.644785	0.450682	1.47685	1.80139	0.983867	1	0	949	585
contig_9335_1066_2001_+	1374	0	0.97947	0	2.6419	1.6986	2.4306	6.7008	5.5134	5.1185	4.7679	5.5304	6.2542	10.662	11.447	10.368	3.4881	3.5469	3.4355	0.32649	2.25703	5.77757	5.5175	10.8257	3.49017	0.565497	0.495023	0.823563	0.743234	0.557809	0.0557287	1.82907	1	0	4659	936													PF00223
contig_9335_137_1009_+	1374	1.9769	3.9179	2.0464	3.5225	4.2464	3.2408	4.4672	4.4108	4.0948	7.1519	7.9006	6.2542	6.785	7.6316	6.5979	5.2321	3.5469	3.4355	2.64707	3.6699	4.32427	7.10223	7.00483	4.0715	1.10112	0.518751	0.200715	0.824323	0.550798	1.00665	1.31437	1	0	4659	873													_GAP_||PF00223
contig_9335_3043_3999_+	1374	0.98843	1.9589	1.0232	0.88064	0.84928	0.81019	2.2336	3.3081	2.0474	3.9733	5.5304	6.2542	4.8464	7.6316	5.6553	5.2321	3.5469	3.4355	1.32351	0.846703	2.5297	5.25263	6.04443	4.0715	0.550538	0.0352956	0.680513	1.16554	1.4328	1.00665	1.04585	1	0	4659	957	cyt:cce_0990	psaB; photosystem I P700 chlorophyll a apoprotein A2; K02690 photosystem I P700 chlorophyll a apoprotein A2	cyt01100||cyt00195	K02690	photosystem I P700 chlorophyll a apoprotein A2	Photosynthesis		B1WT11					PF00223
contig_9335_4062_4628_+	1374	3.9537	4.8973	4.0928	4.4032	4.2464	4.051	7.8176	9.9242	7.166	7.1519	7.1106	7.8178	10.662	12.401	11.311	12.208	10.641	13.742	4.3146	4.23353	8.3026	7.3601	11.458	12.197	0.509403	0.176452	1.44164	0.396917	0.87877	1.55053	1.11346	1	0	4659	567													PF00223
contig_9429_257_754_-	1374	2.9653	3.9179	3.0696	1.7613	1.6986	2.4306	0	0	0	3.1786	3.1602	3.1271	0	0	0	0	0	0	3.3176	1.9635	0	3.1553	0	0	0.522484	0.405733	0	0.0260973	0	0	0.269538	0.00436756	0	754	498
contig_9455_278_1003_-	1374	0.98843	0.97947	0	0.88064	0.84928	0	0	0	0	2.384	3.1602	1.5636	2.9078	2.8619	2.8277	5.2321	5.3204	6.871	0.655967	0.57664	0	2.36927	2.8658	5.80783	0.568101	0.499631	0	0.798402	0.0401922	0.921787	0.438332	0.742764	0	1145	726	pti:PHATRDRAFT_32681	hypothetical protein						B7FSB8
contig_9496_502_1427_-	1374	1.9769	1.9589	3.0696	1.7613	0.84928	0.81019	1.1168	2.2054	2.0474	2.384	2.3702	3.1271	1.9386	1.9079	1.8851	1.744	3.5469	5.1533	2.33513	1.14026	1.78987	2.6271	1.91053	3.4814	0.63613	0.538194	0.588222	0.433068	0.026847	1.70559	0.53901	0.999686	0	1495	926									KOG0372	Serine/threonine specific protein phosphatase involved in glycogen accumulation, PP2A-related	Carbohydrate transport and metabolism	METABOLISM	_GAP_||PF00149||_GAP_
contig_95144_391_990_-	1374	0	0	0	0	0	0	0	0	0	3.1786	3.9503	3.9089	4.8464	2.8619	3.7702	43.601	46.11	44.662	0	0	0	3.67927	3.82617	44.791	0	0	0	0.434084	0.993433	1.25946	1.46977	1	0	1397	600	nth:Nther_1851	hypothetical protein						B2A606
contig_95186_567_1539_-	1374	4.9422	4.8973	2.0464	0.88064	0.84928	0.81019	3.3504	4.4108	5.1185	4.7679	3.9503	5.4725	2.9078	3.8158	4.7128	3.4881	0	3.4355	3.96197	0.846703	4.29323	4.73023	3.81213	2.30787	1.65908	0.0352956	0.889894	0.761799	0.902506	1.99884	0.435941	0.745019	0	1540	973	olu:OSTLU_92745	hypothetical protein						A4RXF0
contig_97397_1_369_-	1374	0	0	0	0	0	0	3.3504	2.2054	1.0237	5.5626	7.9006	3.9089	11.631	10.493	11.311	27.905	26.602	27.484	0	0	2.19317	5.7907	11.145	27.3303	0	0	1.1634	2.0056	0.58688	0.664953	-0.223663	0.00658138	0.234023	369	369	mtp:Mthe_0197	von Willebrand factor, type A; K07114 uncharacterized protein		K07114	Ca-activated chloride channel homolog			A0B5M2					PF00092
contig_9758_193_710_-	1374	0.98843	0	0	2.6419	2.5478	3.2408	4.4672	4.4108	4.0948	1.5893	2.3702	2.3453	0	0	0	0	0	0	0.329477	2.81017	4.32427	2.1016	0	0	0.57067	0.375896	0.200715	0.443839	0	0	1.368	1	0	710	518	pti:PHATRDRAFT_17766	Lhcr4; protein fucoxanthin chlorophyll a/c protein						B7FQE1					PF00504
contig_97685_1_303_-	1374	0	0	0	0	0	0	0	0	0	0	0	0	0	0	0	3.4881	5.3204	3.4355	0	0	0	0	0	4.08133	0	0	0	0	0	1.07339
contig_9793_111_1048_-	1374	0	0.97947	2.0464	0.88064	1.6986	0.81019	2.2336	2.2054	2.0474	2.384	2.3702	3.1271	3.8771	2.8619	2.8277	0	1.7735	1.7178	1.00862	1.12981	2.16213	2.6271	3.1889	1.16377	1.02351	0.493844	0.100357	0.433068	0.596244	1.00824	-0.00716929	0	0	1049	938	pti:PHATR_10454	hypothetical protein; K01074 palmitoyl-protein thioesterase [EC:3.1.2.22]	pti01100||pti00062	K01074	palmitoyl-protein thioesterase [EC:3.1.2.22]	Fatty acid elongation || Fatty acid metabolism || Lysosome	3.1.2.22	B5Y506	KOG2541	Palmitoyl protein thioesterase	Lipid transport and metabolism	METABOLISM	PF02089
contig_98202_118_3133_+	1374	1.9769	0.97947	2.0464	0	0	0	0	0	1.0237	7.9465	4.7404	7.036	5.8157	4.7698	7.5404	6.9762	3.5469	8.5888	1.66759	0	0.341233	6.5743	6.04197	6.37063	0.596942	0	0.591033	1.65216	1.39909	2.57492	-0.389058	0	0.275451	3349	3016	ppp:PHYPADRAFT_176216	hypothetical protein; K00281 glycine dehydrogese [EC:1.4.4.2]	ppp00260||ppp01100	K00281	glycine dehydrogese [EC:1.4.4.2]	Glycine, serine and threonine metabolism || Carbon metabolism	1.4.4.2	A9RLL8	KOG2040	Glycine dehydrogese (decarboxylating)	Amino acid transport and metabolism	METABOLISM	PF02347||_GAP_
contig_98678_1_466_+	1374	0.98843	0.97947	0	0.88064	0.84928	0	3.3504	3.3081	3.0711	1.5893	1.5801	1.5636	3.8771	3.8158	3.7702	3.4881	5.3204	3.4355	0.655967	0.57664	3.2432	1.57767	3.82103	4.08133	0.568101	0.499631	0.150536	0.0130216	0.0536418	1.07339	0.105481	0.000189404	0	466	466
contig_98705_1_417_-	1374	4.9422	3.9179	3.0696	4.4032	3.3971	3.2408	4.4672	4.4108	5.1185	1.5893	2.3702	2.3453	2.9078	3.8158	2.8277	1.744	0	1.7178	3.97657	3.68037	4.6655	2.1016	3.18377	1.15393	0.937677	0.630851	0.393322	0.443839	0.54882	0.999421	-1.06248	0	1	550	417
contig_9879_189_1586_-	1374	9.8843	12.733	11.255	5.2838	3.3971	5.6713	8.9344	7.7188	7.166	11.125	12.641	11.727	7.7543	8.5856	7.5404	8.7202	10.641	8.5888	11.2908	4.78407	7.93973	11.831	7.9601	9.31667	1.42469	1.21667	0.904665	0.763332	0.552156	1.14879	0.335284	0.00908949	0	1587	1398	olu:OSTLU_28310	DAD1; Diaminopimelate decarboxylase; K01586 diaminopimelate decarboxylase [EC:4.1.1.20]	olu01110||olu00300||olu01100	K01586	diaminopimelate decarboxylase [EC:4.1.1.20]	Lysine biosynthesis || Biosynthesis of amino acids	4.1.1.20	A4S9T6					_GAP_||PF02784||PF00278
contig_99516_1_706_+	1374	3.9537	3.9179	4.0928	3.5225	5.0957	3.2408	2.2336	3.3081	3.0711	0.79465	0.79006	0.78178	0.96928	1.9079	0.94256	0	0	0	3.98813	3.953	2.87093	0.78883	1.27325	0	0.0923945	0.999581	0.564524	0.00652257	0.549788	0	0.259562	0.00093599	0	934	706	tps:THAPSDRAFT_11926	hypothetical protein						B8CFZ0					_GAP_||PF04749
contig_99770_1_1130_+	1374	17.792	13.713	19.441	20.255	19.533	22.685	20.102	18.746	19.45	9.5358	11.061	10.163	12.601	13.355	11.311	15.696	17.735	15.46	16.982	20.8243	19.4327	10.2533	12.4223	16.297	2.94866	1.65133	0.678166	0.766596	1.03365	1.25092	-1.67695	0	1	1181	1130									KOG1458	Fructose-1,6-bisphosphatase	Carbohydrate transport and metabolism	METABOLISM	PF00316||_GAP_
contig_99896_1_439_-	1374	6.919	7.8357	6.1392	6.1644	7.6435	7.2917	4.4672	8.8215	6.1423	7.9465	7.9006	8.5996	9.6928	14.309	9.4256	13.952	14.188	12.024	6.96463	7.0332	6.477	8.1489	11.1425	13.388	0.84917	0.772691	2.19636	0.390992	2.74555	1.18714	0.901295	1	0	552	439	dtu:Dtur_0880	Smc1 chromosome segregation protein, putative						B8E078
contig_100206_1_957_-	1374	0	0	0	2.6419	0.84928	0.81019	1.1168	2.2054	4.0948	0.79465	0.79006	0.78178	0	1.9079	1.8851	0	0	0	0	1.43379	2.47233	0.78883	1.26433	0	0	1.04644	1.50684	0.00652257	1.095	0	-0.00243918	4.31e-06	9.62e-06	1475	957	ote:Oter_2734	nucleotide sugar dehydrogese (EC:1.1.1.22); K00012 UDPglucose 6-dehydrogese [EC:1.1.1.22]	ote00053||ote01110||ote00500||ote00520||ote01100||ote00040	K00012	UDPglucose 6-dehydrogese [EC:1.1.1.22]	Pentose and glucurote interconversions || Ascorbate and aldarate metabolism || Starch and sucrose metabolism || Amino sugar and nucleotide sugar metabolism	1.1.1.22	B1ZVZ9	KOG2666	UDP-glucose/GDP-mannose dehydrogese	Carbohydrate transport and metabolism	METABOLISM	PF03721||PF00984||PF03720||_GAP_
contig_10028_75_521_-	1374	1.9769	0.97947	0	0	0	0	0	0	0	0	0.79006	0	0	0	0	0	0	0	0.985457	0	0	0.263353	0	0	0.988464	0	0	0.456141	0	0	0.956134	1	0	667	447									KOG0027	Calmodulin and related proteins (EF-Hand superfamily)	Sigl transduction mechanisms	CELLULAR PROCESSES AND SIGLING	PF13499
contig_101516_1_1586_-	1374	0	0	1.0232	0	0.84928	0	0	1.1027	1.0237	0	0.79006	1.5636	1.9386	0.95395	1.8851	0	0	0	0.341067	0.283093	0.7088	0.784553	1.59255	0	0.590745	0.490332	0.615108	0.781815	0.55369	0	-0.753202	0	0.999531	1587	1586	pti:PHATRDRAFT_32733	hypothetical protein						B7FSH0					_GAP_||PF03577||_GAP_
contig_10296_354_1008_-	1374	0	0.97947	1.0232	1.7613	0.84928	0.81019	3.3504	4.4108	1.0237	0	0	0.78178	0.96928	1.9079	1.8851	0	0	1.7178	0.667557	1.14026	2.9283	0.260593	1.58743	0.5726	0.578534	0.538194	1.73255	0.451361	0.535452	0.991772	0.0464871	0	0	1009	655									KOG0027	Calmodulin and related proteins (EF-Hand superfamily)	Sigl transduction mechanisms	CELLULAR PROCESSES AND SIGLING	_GAP_||PF13499||PF00036
contig_10696_73_1229_+	1374	0	0	0	1.7613	2.5478	0.81019	1.1168	2.2054	1.0237	0	0	0	0.96928	0.95395	0.94256	0	0	0	0	1.70643	1.44863	0	0.955263	0	0	0.870104	0.65703	0	0.0134083	0	-0.154907	0	0	1290	1157	dat:HRM2_38490	hypothetical protein						C0QAX4
contig_1077_191_755_-	1374	1.9769	0.97947	1.0232	0	0	0	2.2336	0	1.0237	1.5893	0.79006	2.3453	0.96928	0.95395	0	3.4881	1.7735	1.7178	1.32652	0	1.08577	1.57489	0.641077	2.32647	0.563667	0	1.11809	0.77772	0.555242	1.00639	0.379783	0.361387	0	755	565	tps:THAPSDRAFT_bd298	hypothetical protein						B8LE22					_GAP_||PF03992
contig_10808_187_975_-	1374	0.98843	0	0	0	0.84928	0	1.1168	2.2054	2.0474	0.79465	1.5801	0.78178	0.96928	1.9079	1.8851	0	0	0	0.329477	0.283093	1.78987	1.05218	1.58743	0	0.57067	0.490332	0.588222	0.45724	0.535452	0	1.35446	1	0	1369	789	tps:THAPSDRAFT_20983	hypothetical protein						B8BRV7	KOG0028	Ca2+-binding protein (centrin/caltractin), EF-Hand superfamily protein	Cytoskeleton	CELLULAR PROCESSES AND SIGLING	PF13499||_GAP_||PF05542
contig_10831_420_761_-	1374	0	0	0	0	0	0	0	0	0	1.5893	0.79006	1.5636	0	0	0	0	0	0	0	0	0	1.31432	0	0	0	0	0	0.454204	0	0	0.212729	0	0	761	342	pti:PHATRDRAFT_12662	hypothetical protein						B7FZX6
contig_108431_1004_1756_+	1374	0	0	0	0	0	0	0	0	0	0	0	0.78178	1.9386	1.9079	0.94256	0	0	0	0	0	0	0.260593	1.59635	0	0	0	0	0.451361	0.56641	0	0.962516	1	0	2062	753									KOG0864	Ran-binding protein RANBP1 and related RanBD domain proteins	Intracellular trafficking, secretion, and vesicular transport	CELLULAR PROCESSES AND SIGLING	_GAP_||PF00638||_GAP_
contig_108484_1_1009_+	1374	0.98843	1.9589	2.0464	1.7613	2.5478	3.2408	1.1168	1.1027	2.0474	0.79465	0	1.5636	0	0	0	0	0	0	1.66458	2.51663	1.4223	0.786083	0	0	0.587192	0.740242	0.541398	0.781835	0	0	-1.37109	0	1	1114	1009	ccr:CC_0554	hypothetical protein						Q9AAP3
contig_108572_1_1057_+	1374	0.98843	0	1.0232	0	1.6986	2.4306	1.1168	1.1027	1.0237	0	0	0	0	0.95395	0	0	0	0	0.670543	1.3764	1.08107	0	0.317983	0	0.580968	1.24692	0.0501787	0	0.550763	0	-1.27148	0	1	1593	1057									KOG1339	Aspartyl protease	Posttranslatiol modification, protein turnover, chaperones	CELLULAR PROCESSES AND SIGLING	_GAP_||PF00026
contig_108596_971_2135_-	1374	0.98843	1.9589	1.0232	0.88064	1.6986	1.6204	0	1.1027	1.0237	0	0	0	0	0	0	0	0	0	1.32351	1.39988	0.7088	0	0	0	0.550538	0.451372	0.615108	0	0	0	-1.77577	0	1	2137	1165	pti:PHATRDRAFT_54986	cell surface protein						B7G9B0
contig_108852_184_1011_-	1374	1.9769	1.9589	0	0.88064	2.5478	0.81019	0	0	1.0237	0	0	0	0	0	0	0	0	0	1.31193	1.41288	0.341233	0	0	0	1.1362	0.983503	0.591033	0	0	0	-0.346495	0	0.0290171	1454	828
contig_10902_1_2383_+	1374	0	0	0	0.88064	1.6986	0	1.1168	0	1.0237	0	0	0	0	0	0	0	0	0	0	0.859747	0.7135	0	0	0	0	0.849493	0.61966	0	0	0	0.0516504	0	0	2597	2383	tet:TTHERM_00151380	ATP:guanido phosphotransferase, C-termil catalytic domain containing protein							KOG3581	Creatine kises	Energy production and conversion	METABOLISM	_GAP_||PF02807||_GAP_||PF00217||_GAP_||PF02807||_GAP_||PF00217
contig_109192_1_2693_+	1374	1.9769	0.97947	2.0464	1.7613	3.3971	1.6204	1.1168	1.1027	0	0.79465	0.79006	0	0	0	0	0	0	0	1.66759	2.2596	0.739833	0.528237	0	0	0.596942	0.98762	0.640753	0.457472	0	0	-1.97979	0	1	3071	2693									KOG1543	Cysteine proteise Cathepsin L	Posttranslatiol modification, protein turnover, chaperones	CELLULAR PROCESSES AND SIGLING	_GAP_||PF00112||_GAP_
contig_109355_34_3951_+	1374	0.98843	0.97947	2.0464	2.6419	2.5478	2.4306	0	1.1027	1.0237	0.79465	1.5801	0.78178	0.96928	0.95395	0.94256	0	0	0	1.3381	2.5401	0.7088	1.05218	0.955263	0	0.613422	0.10586	0.615108	0.45724	0.0134083	0	-2.09248	0	1	3954	3918
contig_109430_202_852_-	1374	0	0	0	0	0	0	0	0	0	0.79465	1.5801	2.3453	0	0	0	0	0	0	0	0	0	1.57335	0	0	0	0	0	0.775347	0	0	1.16936	1	0	959	651													_GAP_||PF00504
contig_109440_1998_2975_-	1374	0	0	0	0	0	0	0	0	0	1.5893	0	0	0	0	0	1.744	1.7735	1.7178	0	0	0	0.529767	0	1.7451	0	0	0	0.917583	0	0.0278663	-0.167578	0	0	3129	978	pmn:PMN2A_1578	FAD-dependent pyridine nucleotide-disulfide oxidoreductase (EC:1.8.1.9); K00384 thioredoxin reductase (DPH) [EC:1.8.1.9]	pmn00240||pmn00450	K00384	thioredoxin reductase (DPH) [EC:1.8.1.9]	Pyrimidine metabolism || Selenocompound metabolism	1.8.1.9	Q46HG2					PF07992||_GAP_
contig_109623_2364_2855_+	1374	1.9769	1.9589	1.0232	1.7613	0	1.6204	0	0	0	0	0	0	0	0	0	0	0	0	1.653	1.12723	0	0	0	0	0.545497	0.978751	0	0	0	0	-0.338979	0	0.0204802	3330	492									KOG0191	Thioredoxin/protein disulfide isomerase	Posttranslatiol modification, protein turnover, chaperones	CELLULAR PROCESSES AND SIGLING	PF00085||_GAP_
contig_109974_1_473_+	1374	2.9653	1.9589	2.0464	1.7613	1.6986	1.6204	2.2336	2.2054	2.0474	2.384	2.3702	2.3453	0	0	0	0	0	1.7178	2.32353	1.69343	2.16213	2.3665	0	0.5726	0.557506	0.0705919	0.100357	0.0196135	0	0.991772	0.9198	1	0	683	473	tps:THAPSDRAFT_20812	hypothetical protein						B8BQT6
contig_109982_2030_4991_+	1374	0	0	0	2.6419	0.84928	0.81019	1.1168	1.1027	2.0474	0.79465	0	0	3.8771	2.8619	0.94256	0	1.7735	0	0	1.43379	1.4223	0.264883	2.56052	0.591167	0	1.04644	0.541398	0.458791	1.4903	1.02393	-1.39707	0	1	6013	2962
contig_110033_70_1005_+	1374	1.9769	1.9589	2.0464	1.7613	2.5478	1.6204	2.2336	2.2054	3.0711	0.79465	0.79006	0.78178	1.9386	1.9079	1.8851	1.744	1.7735	0	1.99407	1.9765	2.50337	0.78883	1.91053	1.1725	0.046207	0.499751	0.491874	0.00652257	0.026847	1.01552	-1.73282	0	1	1350	936
contig_110354_341_796_-	1374	0	0.97947	0	0	0	0	0	0	0	0	0	0	0	0.95395	1.8851	0	0	0	0.32649	0	0	0	0.94635	0	0.565497	0	0	0	0.942573	0	0.34296	0.30471	0	1355	456	pti:PHATRDRAFT_42406	hypothetical protein						B7FNU0					PF00484
contig_110364_1871_2755_-	1374	0.98843	0.97947	2.0464	0	0	0	0	0	0	1.5893	0.79006	0.78178	0	0	0	0	0	0	1.3381	0	0	1.05371	0	0	0.613422	0	0	0.46385	0	0	-1.39721	0	0.99999	2757	885													_GAP_||PF00547||_GAP_||PF00699||_GAP_
contig_11041_1_877_+	1374	0	0.97947	1.0232	0	0	0.81019	0	1.1027	0	0	0	0	2.9078	2.8619	1.8851	0	0	0	0.667557	0.270063	0.367567	0	2.5516	0	0.578534	0.467763	0.636644	0	0.577662	0	0.281907	9.89e-05	0	1152	877
contig_110681_1_710_+	1374	0	0	0	0.88064	0	0	1.1168	2.2054	2.0474	3.1786	2.3702	2.3453	0.96928	0.95395	0.94256	0	0	0	0	0.293547	1.78987	2.63137	0.955263	0	0	0.508438	0.588222	0.474081	0.0134083	0	0.837238	1	0	970	710									KOG0180	20S proteasome, regulatory subunit beta type PSMB3/PUP3	Posttranslatiol modification, protein turnover, chaperones	CELLULAR PROCESSES AND SIGLING	_GAP_||PF00227
contig_110956_31_3148_+	1374	0	0	0	0.88064	1.6986	1.6204	0	0	0	0	0	0	0	0	0	0	0	0	0	1.39988	0	0	0	0	0	0.451372	0	0	0	0	-0.875963	0	1	3286	3118	ppp:PHYPADRAFT_171567	hypothetical protein						A9TRS8
contig_11101_149_997_-	1374	0.98843	0.97947	0	0.88064	0	1.6204	0	0	0	0	1.5801	0.78178	0	0	0	0	0	0	0.655967	0.83368	0	0.787293	0	0	0.568101	0.81122	0	0.790064	0	0	0.274804	0.0170449	0	1247	849
contig_111356_1_1135_+	1374	0.98843	0.97947	1.0232	0.88064	0	0.81019	0	0	0	1.5893	2.3702	1.5636	0.96928	0.95395	0.94256	0	0	0	0.997033	0.56361	0	1.84103	0.955263	0	0.0230996	0.48937	0	0.458452	0.0134083	0	-0.857682	0	0.998461	1136	1135	tps:THAPSDRAFT_262032	hypothetical protein						B8C0Z7
contig_11169_224_1755_-	1374	0.98843	1.9589	1.0232	0.88064	1.6986	2.4306	0	0	0	0	0	0	0	0	0	0	0	0	1.32351	1.66995	0	0	0	0	0.550538	0.775377	0	0	0	0	-0.17658	0	0	3675	1532	ppp:PHYPADRAFT_98724	hypothetical protein; K13412 calcium-dependent protein kise [EC:2.7.11.1]		K13412	calcium-dependent protein kise [EC:2.7.11.1]	Plant-pathogen interaction || Toxoplasmosis	2.7.11.1	A9TXV3	KOG0028	Ca2+-binding protein (centrin/caltractin), EF-Hand superfamily protein	Cytoskeleton	CELLULAR PROCESSES AND SIGLING	_GAP_||PF13499||PF13405||_GAP_
contig_112161_1_1053_-	1374	0	0	0	0.88064	0	0	0	0	0	0.79465	0	2.3453	0	0.95395	0.94256	0	0	0	0	0.293547	0	1.04665	0.63217	0	0	0.508438	0	1.19278	0.547505	0	-0.963809	0	1	1054	1053	scl:sce7103	hypothetical protein						A9ER91					PF03639
contig_11290_1_640_+	1374	0.98843	0.97947	2.0464	1.7613	0.84928	2.4306	0	0	0	1.5893	1.5801	1.5636	1.9386	0.95395	1.8851	0	0	0	1.3381	1.68039	0	1.57767	1.59255	0	0.613422	0.793759	0	0.0130216	0.55369	0	0.410468	0.517234	0	927	640
contig_11320_119_592_+	1374	0.98843	1.9589	2.0464	0.88064	0.84928	1.6204	0	0	0	1.5893	1.5801	0.78178	0.96928	0.95395	0	1.744	0	0	1.66458	1.11677	0	1.31706	0.641077	0.581333	0.587192	0.436435	0	0.463589	0.555242	1.0069	1.05859	1	0	716	474
contig_113492_244_930_-	1374	0	0	0	0	0	0	0	0	0	0	0	0	0.96928	1.9079	0.94256	0	0	0	0	0	0	0	1.27325	0	0	0	0	0	0.549788	0	0.252387	0.00503052	0	1086	687	tps:THAPSDRAFT_21348	hypothetical protein						B8BUT8
contig_11381_78_791_+	1374	0.98843	0.97947	1.0232	0.88064	2.5478	0.81019	1.1168	0	0	0	0	0	2.9078	1.9079	1.8851	0	0	0	0.997033	1.41288	0.372267	0	2.2336	0	0.0230996	0.983503	0.644785	0	0.583986	0	0.651312	1	0	1194	714	olu:OSTLU_92650	hypothetical protein						A4RWG7
contig_113943_200_977_-	1374	0	0	0	0	0	0	0	0	0	1.5893	1.5801	2.3453	1.9386	0.95395	2.8277	1.744	3.5469	3.4355	0	0	0	1.83823	1.90675	2.9088	0	0	0	0.439157	0.937281	1.01028	0.288906	0.0309922	0	977	778	tps:THAPS_23492	hypothetical protein						B5YN67					_GAP_||PF01625
contig_115639_1_931_+	1374	0	0	0	0	0	0	0	0	0	0	0.79006	0.78178	0.96928	1.9079	1.8851	0	0	0	0	0	0	0.523947	1.58743	0	0	0	0	0.45377	0.535452	0	-0.524231	9.26e-08	0.7539	931	931													_GAP_||PF00561||_GAP_
contig_11583_170_508_-	1374	2.9653	2.9384	2.0464	0.88064	0.84928	0.81019	0	0	0	0.79465	1.5801	1.5636	0	0	0	0	0	0	2.65003	0.846703	0	1.31278	0	0	0.522935	0.0352956	0	0.448792	0	0	0.466104	0.758427	0	1998	339
contig_116266_23_1107_+	1374	0.98843	1.9589	1.0232	2.6419	2.5478	1.6204	0	0	0	0	0	0	0	0	0	0	0	0	1.32351	2.27003	0	0	0	0	0.550538	0.564563	0	0	0	0
contig_116479_1_464_+	1374	2.9653	1.9589	1.0232	1.7613	2.5478	1.6204	0	0	0	1.5893	0.79006	1.5636	0	0	0	1.744	0	0	1.98247	1.9765	0	1.31432	0	0.581333	0.971264	0.499751	0	0.454204	0	1.0069	0.303224	9.2e-06	0	984	464									KOG1752	Glutaredoxin and related proteins	Posttranslatiol modification, protein turnover, chaperones	CELLULAR PROCESSES AND SIGLING	_GAP_||PF00462
contig_116696_112_465_+	1374	0.98843	1.9589	1.0232	0.88064	0.84928	1.6204	0	0	0	1.5893	1.5801	1.5636	0	0	0	0	0	0	1.32351	1.11677	0	1.57767	0	0	0.550538	0.436435	0	0.0130216	0	0	0.649356	1	0	554	354									KOG3470	Beta-tubulin folding cofactor A	Posttranslatiol modification, protein turnover, chaperones	CELLULAR PROCESSES AND SIGLING	PF02970
contig_117413_2101_2662_+	1374	0	0.97947	0	0	0.84928	0	1.1168	1.1027	2.0474	0.79465	2.3702	1.5636	2.9078	2.8619	1.8851	3.4881	1.7735	0	0.32649	0.283093	1.4223	1.57615	2.5516	1.75387	0.565497	0.490332	0.541398	0.78785	0.577662	1.74413	0.496954	0.927311	0	2664	562
contig_117470_333_794_-	1374	1.9769	0.97947	1.0232	0	0	0	0	0	0	0	0	0	0	0	0	0	0	0	1.32652	0	0	0	0	0	0.563667	0	0	0	0	0	0.723695	1	0	817	462
contig_117792_105_820_-	1374	0.98843	0	0	0.88064	0.84928	0	0	0	0	2.384	0.79006	1.5636	0	0	0	0	0	0	0.329477	0.57664	0	1.57922	0	0	0.57067	0.499631	0	0.797085	0	0	0.599949	0.968653	0	820	716
contig_11860_282_1049_-	1374	0	0	0	0	0	0.81019	0	0	0	0.79465	0.79006	1.5636	1.9386	1.9079	1.8851	3.4881	3.5469	1.7178	0	0.270063	0	1.04944	1.91053	2.9176	0	0.467763	0	0.445284	0.026847	1.03947	0.543939	0.865237	0	1050	768
contig_119831_1_501_+	1374	0	0	0	0	0.84928	0	0	0	0	0	0	0	0	0	1.8851	0	0	0	0	0.283093	0	0	0.628367	0	0	0.490332	0	0	1.08836	0	0.249796	0.297216	0.0133619	501	501	acp:A2cp1_0203	Citrate (pro-3S)-lyase (EC:4.1.3.6); K01644 citrate lyase subunit beta / citryl-CoA lyase [EC:4.1.3.6 4.1.3.34]	acp01110||acp02020||acp00020	K01644	citrate lyase subunit beta / citryl-CoA lyase [EC:4.1.3.6 4.1.3.34]	Citrate cycle (TCA cycle) || Two-component system	4.1.3.34||4.1.3.6	B8J8W4					PF03328||_GAP_
contig_120194_81_665_+	1374	0	0	0	0	0	0	0	0	0	0	0	1.5636	0	0	0	0	0	0	0	0	0	0.5212	0	0	0	0	0	0.902745	0	0	0.352898	0.367388	2.94e-06	869	585	cre:CHLREDRAFT_179025	hypothetical protein; K01519 nucleoside-triphosphate pyrophosphatase [EC:3.6.1.19]	cre00230||cre01100||cre00240	K01519	inosine triphosphate pyrophosphatase [EC:3.6.1.19]	Purine metabolism || Pyrimidine metabolism || Drug metabolism - other enzymes	3.6.1.19	A8JEL2	KOG3222	Inosine triphosphate pyrophosphatase	Nucleotide transport and metabolism	METABOLISM	PF01725
contig_120795_126_970_-	1374	0	0	1.0232	0.88064	1.6986	0	0	2.2054	2.0474	1.5893	1.5801	2.3453	1.9386	2.8619	1.8851	0	0	0	0.341067	0.859747	1.4176	1.83823	2.22853	0	0.590745	0.849493	1.23022	0.439157	0.549164	0	0.440852	0.616723	0	970	845													_GAP_||PF01467||_GAP_
contig_12093_57_843_+	1374	0.98843	1.9589	1.0232	1.7613	2.5478	1.6204	0	0	0	0.79465	2.3702	1.5636	0	0	0	3.4881	0	3.4355	1.32351	1.9765	0	1.57615	0	2.30787	0.550538	0.499751	0	0.78785	0	1.99884	-0.176566	0	0	843	787	tps:THAPSDRAFT_20726	MDH1; probable malate dehydrogese with mitochondrial or glyoxysomal precursor (EC:1.1.1.37); K00026 malate dehydrogese [EC:1.1.1.37]	tps01100||tps01110||tps00020||tps00620||tps00630	K00026	malate dehydrogese [EC:1.1.1.37]	Citrate cycle (TCA cycle) || Cysteine and methionine metabolism || Pyruvate metabolism || Glyoxylate and dicarboxylate metabolism || Carbon fixation in photosynthetic organisms || Carbon metabolism	1.1.1.37	B8BQC2	KOG1494	D-dependent malate dehydrogese	Energy production and conversion	METABOLISM	PF00056||PF02866
contig_1215_168_914_-	1374	0.98843	1.9589	0	0	0.84928	0	0	1.1027	0	3.1786	2.3702	2.3453	0.96928	0.95395	0.94256	3.4881	1.7735	3.4355	0.982443	0.283093	0.367567	2.63137	0.955263	2.89903	0.979464	0.490332	0.636644	0.474081	0.0134083	0.975095	0.465165	0.940681	0	1272	747	tps:THAPSDRAFT_32860	EAR1; enoyl-reductase [DH] (EC:1.3.1.9); K00208 enoyl-[acyl-carrier protein] reductase I [EC:1.3.1.9]	tps01100||tps00061	K00208	enoyl-[acyl-carrier protein] reductase I [EC:1.3.1.9 1.3.1.10]	Fatty acid biosynthesis || Biotin metabolism || Fatty acid metabolism	1.3.1.9	B8BXA1	KOG0725	Reductases with broad range of substrate specificities	General function prediction only	POORLY CHARACTERIZED	PF13561
contig_12398_1_829_+	1374	0	0	0	0	0	0	0	0	0	0	0	0	1.9386	0	0.94256	0	5.3204	1.7178	0	0	0	0	0.960387	2.34607	0	0	0	0	0.969423	2.71527	0.436865	0.655289	0	988	829
contig_126504_128_694_-	1374	0.98843	0.97947	2.0464	0.88064	0.84928	0	2.2336	2.2054	1.0237	0.79465	0.79006	0	0	0	0.94256	0	0	0	1.3381	0.57664	1.8209	0.528237	0.314187	0	0.613422	0.499631	0.690539	0.457472	0.544187	0	-0.950014	0	0.997144	893	567													PF10282||_GAP_
contig_1270_1_620_-	1374	3.9537	0.97947	1.0232	1.7613	2.5478	2.4306	1.1168	1.1027	2.0474	0.79465	0	0.78178	0	0.95395	0	0	0	0	1.98546	2.24657	1.4223	0.525477	0.317983	0	1.70469	0.424319	0.541398	0.455122	0.550763	0	0.447064	0.654879	0	673	620
contig_131811_127_1062_+	1374	0	0	0	0	0	0	0	1.1027	0	0	0	0	0.96928	0.95395	1.8851	0	0	0	0	0	0.367567	0	1.26944	0	0	0	0.636644	0	0.533229	0	-1.48339	0	1	1172	936
contig_132473_115_1410_-	1374	0	0	0	0	0	0	0	1.1027	1.0237	0.79465	0.79006	1.5636	0.96928	0.95395	0.94256	0	0	1.7178	0	0	0.7088	1.04944	0.955263	0.5726	0	0	0.615108	0.445284	0.0134083	0.991772	0.0585756	2.82e-06	0	1411	1296	mau:Micau_2571 || mil:ML5_5823	beta-lactamase; K01286 D-alanyl-D-alanine carboxypeptidase [EC:3.4.16.4] || beta-lactamase; K01286 D-alanyl-D-alanine carboxypeptidase [EC:3.4.16.4]		K01286	D-alanyl-D-alanine carboxypeptidase [EC:3.4.16.4]		3.4.16.4	D9T7Y4					_GAP_||PF00144||_GAP_
contig_132790_1069_1278_+	1374	0	0	0	0	0	0	0	0	0	0.79465	1.5801	2.3453	2.9078	2.8619	1.8851	3.4881	0	1.7178	0	0	0	1.57335	2.5516	1.7353	0	0	0	0.775347	0.577662	1.74412	1.14228	1	0	1772	210
contig_133051_1_650_+	1374	1.9769	0	1.0232	0	0	0	1.1168	1.1027	2.0474	0	0	0	0	0	0	0	0	0	1.00003	0	1.4223	0	0	0	0.988654	0	0.541398	0	0	0	-1.72574	0	1	2064	650
contig_133192_17_1506_+	1374	0	0	0	0	0	0	0	0	0	0.79465	0.79006	1.5636	0	0	0	0	0	0	0	0	0	1.04944	0	0	0	0	0	0.445284	0	0	-0.906451	0	1	1507	1490
contig_133278_1092_1755_+	1374	0.98843	0.97947	0	2.6419	1.6986	0	0	1.1027	1.0237	0	0	0	0	0	0	0	0	0	0.655967	1.44683	0.7088	0	0	0	0.568101	1.33882	0.615108	0	0	0	-1.12505	0	1	1756	664									KOG1543	Cysteine proteise Cathepsin L	Posttranslatiol modification, protein turnover, chaperones	CELLULAR PROCESSES AND SIGLING	PF00112
contig_133365_1_1143_+	1374	0	0	0	0	0	0	0	1.1027	0	0.79465	0	0	0	0.95395	1.8851	0	0	0	0	0	0.367567	0.264883	0.94635	0	0	0	0.636644	0.458791	0.942573	0	0.161717	0	0	1757	1143													_GAP_||PF09206
contig_133447_272_976_-	1374	2.9653	1.9589	3.0696	1.7613	2.5478	1.6204	2.2336	1.1027	1.0237	1.5893	3.9503	3.1271	1.9386	1.9079	1.8851	3.4881	1.7735	3.4355	2.6646	1.9765	1.45333	2.8889	1.91053	2.89903	0.613375	0.499751	0.676884	1.19839	0.026847	0.975095	0.250798	0	0	2623	705	tps:THAPSDRAFT_6105	hypothetical protein						B8C5K3
contig_133485_1_2003_-	1374	1.9769	1.9589	2.0464	0.88064	1.6986	1.6204	2.2336	2.2054	2.0474	0.79465	0	0	2.9078	1.9079	3.7702	0	0	0	1.99407	1.39988	2.16213	0.264883	2.86197	0	0.046207	0.451372	0.100357	0.458791	0.931996	0	-1.23615	0	1	2173	2003
contig_133486_49_1158_+	1374	1.9769	1.9589	1.0232	0.88064	1.6986	2.4306	1.1168	1.1027	1.0237	0.79465	0.79006	1.5636	0.96928	0.95395	0.94256	0	1.7735	1.7178	1.653	1.66995	1.08107	1.04944	0.955263	1.16377	0.545497	0.775377	0.0501787	0.445284	0.0134083	1.00824	0.116113	0	0	1261	1110	tps:THAPSDRAFT_8355	hypothetical protein						B8C991
contig_133836_294_947_-	1374	0.98843	1.9589	2.0464	0.88064	0.84928	0.81019	0	1.1027	0	0	0	0	0	0	0.94256	0	0	0	1.66458	0.846703	0.367567	0	0.314187	0	0.587192	0.0352956	0.636644	0	0.544187	0	0.088813	0	0	1170	654	tet:TTHERM_00137550	hypothetical protein											_GAP_||PF13864
contig_134764_115_1640_+	1374	0	0	0	0	0.84928	0	1.1168	1.1027	1.0237	1.5893	0.79006	1.5636	0.96928	0.95395	0.94256	0	1.7735	0	0	0.283093	1.08107	1.31432	0.955263	0.591167	0	0.490332	0.0501787	0.454204	0.0134083	1.02393	-0.191562	0	0.0138982	1734	1526													PF04185||_GAP_
contig_135436_2115_3388_+	1374	0.98843	0	0	1.7613	0.84928	0.81019	0	0	0	1.5893	0.79006	2.3453	0.96928	0.95395	0.94256	0	0	0	0.329477	1.14026	0	1.57489	0.955263	0	0.57067	0.538194	0	0.77772	0.0134083	0	-0.136235	0	0.00356218	3391	1274									KOG1543	Cysteine proteise Cathepsin L	Posttranslatiol modification, protein turnover, chaperones	CELLULAR PROCESSES AND SIGLING	PF00112||_GAP_
contig_135468_1_1045_+	1374	0	0	1.0232	1.7613	1.6986	1.6204	0	1.1027	2.0474	0	0.79006	0.78178	0	0	0	0	0	0	0.341067	1.69343	1.05003	0.523947	0	0	0.590745	0.0705919	1.02472	0.45377	0	0	-0.710534	0	1	1621	1045	cre:CHLREDRAFT_151480	hypothetical protein						A8J8K5					_GAP_||PF00153||_GAP_
contig_135469_134_880_-	1374	0	0	1.0232	0	0.84928	0.81019	1.1168	2.2054	2.0474	0.79465	0.79006	0.78178	0	0	0	0	0	0	0.341067	0.553157	1.78987	0.78883	0	0	0.590745	0.479446	0.588222	0.00652257	0	0	-0.117843	0	0	1453	747	tps:THAPSDRAFT_1326	hypothetical protein; K00958 sulfate adenylyltransferase [EC:2.7.7.4]	tps01100||tps00920||tps00230||tps00450	K00958	sulfate adenylyltransferase [EC:2.7.7.4]	Purine metabolism || Selenocompound metabolism || Sulfur metabolism	2.7.7.4	B8BQL7					PF01747
contig_136520_1_1065_+	1374	1.9769	1.9589	2.0464	3.5225	1.6986	3.2408	1.1168	2.2054	3.0711	0	0	0	0.96928	0.95395	0.94256	0	0	0	1.99407	2.82063	2.1311	0	0.955263	0	0.046207	0.981864	0.979266	0	0.0134083	0	-1.42089	0	1	2425	1065
contig_136541_1320_1994_-	1374	1.9769	2.9384	2.0464	2.6419	1.6986	1.6204	0	0	0	0	0	0	0	0	0	0	0	0	2.32057	1.98697	0	0	0	0	0.536187	0.568535	0	0	0	0	-0.54916	0	0.999934	2722	675	cel:F49E11.6	scl-11; SCP-Like extracellular protein family member (scl-11)							KOG3017	Defense-related protein containing SCP domain	Function unknown	POORLY CHARACTERIZED	PF00188||_GAP_
contig_137197_1073_1510_+	1374	0	0	0	0.88064	1.6986	0	0	0	0	0	0	0	0	0	0	0	0	0	0	0.859747	0	0	0	0	0	0.849493	0	0	0	0	-1.34289	0	1	1511	438
contig_137725_259_987_-	1374	0.98843	1.9589	2.0464	1.7613	2.5478	1.6204	2.2336	2.2054	1.0237	0	0	0	0	0	0	0	0	0	1.66458	1.9765	1.8209	0	0	0	0.587192	0.499751	0.690539	0	0	0	-2.83982	0	1	2170	729
contig_137725_990_1925_-	1374	0.98843	0.97947	1.0232	0.88064	0.84928	1.6204	2.2336	1.1027	1.0237	0	0	0	0	0	0	0	0	0	0.997033	1.11677	1.45333	0	0	0	0.0230996	0.436435	0.676884	0	0	0	-3.27614	0	1	2170	936
contig_137846_3986_4363_-	1374	0	0	0	0.88064	0.84928	0.81019	0	0	0	1.5893	2.3702	1.5636	1.9386	2.8619	1.8851	0	0	0	0	0.846703	0	1.84103	2.22853	0	0	0.0352956	0	0.458452	0.549164	0	0.552098	1	0	4449	378	olu:OSTLU_30488	RPL7; Ribosomal protein L7, component of cytosolic 80S ribosome and 60S large subunit; K02937 large subunit ribosomal protein L7e	olu03010	K02937	large subunit ribosomal protein L7e	Ribosome		A4RU41	KOG3184	60S ribosomal protein L7	Translation, ribosomal structure and biogenesis	INFORMATION STORAGE AND PROCESSING	PF08079||PF00327
contig_138186_83_2722_+	1374	0	0	0	0	0.84928	0	1.1168	1.1027	0	0.79465	1.5801	2.3453	0	0.95395	2.8277	0	0	0	0	0.283093	0.739833	1.57335	1.26055	0	0	0.490332	0.640753	0.775347	1.43857	0	-0.741959	0	1	3055	2640
contig_138478_1_459_+	1374	0.98843	0	1.0232	0	0	0	0	0	0	0.79465	1.5801	0.78178	0	0	0	0	0	0	0.670543	0	0	1.05218	0	0	0.580968	0	0	0.45724	0	0	-0.285248	0.000502388	0.270633	459	459
contig_138824_264_882_-	1374	1.9769	0	0	0.88064	0.84928	0	0	0	0	0.79465	0.79006	1.5636	0.96928	0.95395	0.94256	0	0	0	0.658967	0.57664	0	1.04944	0.955263	0	1.14136	0.499631	0	0.445284	0.0134083	0	0.729622	0.999131	0	882	619	pti:PHATRDRAFT_11235	hypothetical protein						B7FW38					_GAP_||PF13599||PF00805||_GAP_
contig_140263_356_874_-	1374	1.9769	0.97947	1.0232	0.88064	0	0.81019	0	0	0	0	0	0	0	0	0	0	0	0	1.32652	0.56361	0	0	0	0	0.563667	0.48937	0	0	0	0	-1.81437	0	1	874	519	tps:THAPSDRAFT_7916	FCP_2; hypothetical protein						B8C7W5					PF00504
contig_140437_219_1042_+	1374	2.9653	1.9589	3.0696	1.7613	1.6986	1.6204	2.2336	0	0	0.79465	0.79006	0.78178	0.96928	1.9079	0.94256	0	0	0	2.6646	1.69343	0.744533	0.78883	1.27325	0	0.613375	0.0705919	1.28957	0.00652257	0.549788	0	-0.401536	0	0.387214	1043	824
contig_141286_30_761_+	1374	1.9769	1.9589	2.0464	0.88064	0.84928	0	1.1168	0	0	1.5893	0.79006	0.78178	0	0	0	0	0	0	1.99407	0.57664	0.372267	1.05371	0	0	0.046207	0.499631	0.644785	0.46385	0	0	-0.30205	0	3.96e-05	1236	732	tps:THAPSDRAFT_33653	hypothetical protein						B8BZM1	KOG3003	Molecular chaperone of the GrpE family	Posttranslatiol modification, protein turnover, chaperones	CELLULAR PROCESSES AND SIGLING	_GAP_||PF01025
contig_141991_1_700_-	1374	0	0	0	0	0	0	0	0	0	0.79465	0.79006	0	0.96928	0.95395	2.8277	0	0	0	0	0	0	0.528237	1.58364	0	0	0	0	0.457472	1.07741	0	-0.866979	0	1	996	700
contig_142453_158_621_-	1374	0	0	0	0	0	0	0	0	0	0.79465	0	2.3453	0	0	0	0	0	0	0	0	0	1.04665	0	0	0	0	0	1.19278	0	0	0.827103	0.953195	5.56e-07	621	464	tps:THAPSDRAFT_2291	hypothetical protein						B8BTY4
contig_143378_37_2036_+	1374	0	0	0	0	1.6986	0	0	0	0	0.79465	1.5801	1.5636	0	0.95395	1.8851	0	0	0	0	0.5662	0	1.31278	0.94635	0	0	0.980687	0	0.448792	0.942573	0	-0.695207	0	0.999979	2577	2000	lbz:LbrM09_V2.0850	oligopeptidase B (EC:3.4.21.83); K01354 oligopeptidase B [EC:3.4.21.83]		K01354	oligopeptidase B [EC:3.4.21.83]	Chagas disease (American trypanosomiasis) || African trypanosomiasis	3.4.21.83	A4H5Q8					_GAP_||PF02897||_GAP_||PF00326
contig_143403_43_1928_+	1374	0.98843	0.97947	0	1.7613	1.6986	1.6204	3.3504	1.1027	2.0474	0	0.79006	0	0.96928	1.9079	2.8277	0	0	0	0.655967	1.69343	2.16683	0.263353	1.90163	0	0.568101	0.0705919	1.1286	0.456141	0.929226	0	-0.700587	0	0.999687	2351	1886													_GAP_||PF07773||_GAP_
contig_143619_1_765_+	1374	1.9769	0.97947	1.0232	2.6419	2.5478	1.6204	2.2336	2.2054	3.0711	0	0	0	0	0	0	0	0	0	1.32652	2.27003	2.50337	0	0	0	0.563667	0.564563	0.491874	0	0	0	-0.626203	0	0.983783	765	765
contig_143635_47_1003_+	1374	1.9769	0.97947	1.0232	0.88064	0	0	0	0	0	0	0	0	0	0	0	0	0	0	1.32652	0.293547	0	0	0	0	0.563667	0.508438	0	0	0	0	-0.568016	0	0.99716	1434	957
contig_144066_74_970_+	1374	0.98843	1.9589	0	0	0	0	0	0	0	0.79465	0.79006	0	1.9386	1.9079	0.94256	0	0	0	0.982443	0	0	0.528237	1.59635	0	0.979464	0	0	0.457472	0.56641	0	0.741925	0.999574	0	1095	897													PF00106||_GAP_
contig_147264_258_1376_+	1374	0.98843	1.9589	1.0232	0.88064	0.84928	0.81019	1.1168	1.1027	2.0474	0.79465	0	0	0.96928	0.95395	0.94256	0	0	0	1.32351	0.846703	1.4223	0.264883	0.955263	0	0.550538	0.0352956	0.541398	0.458791	0.0134083	0	-1.44412	0	1	1377	1119
contig_147292_186_1435_+	1374	0.98843	0.97947	0	0	0	0	0	0	0	0.79465	0.79006	2.3453	0	0.95395	0	0	0	0	0.655967	0	0	1.31	0.317983	0	0.568101	0	0	0.896596	0.550763	0	-0.283356	0	0.000169827	1637	1250													_GAP_||PF04278||_GAP_
contig_147481_225_737_+	1374	0.98843	0.97947	3.0696	0.88064	2.5478	2.4306	0	0	0	0.79465	0.79006	0.78178	0	0	0	0	0	0	1.67917	1.95301	0	0.78883	0	0	1.20416	0.93055	0	0.00652257	0	0	0.443088	0.691566	0	1046	513
contig_147876_39_678_+	1374	1.9769	1.9589	3.0696	0.88064	1.6986	1.6204	0	0	0	0.79465	0	0.78178	0	0	0	0	0	0	2.33513	1.39988	0	0.525477	0	0	0.63613	0.451372	0	0.455122	0	0	-0.0467491	2.04e-05	0.000759751	678	640
contig_148440_1_1322_+	1374	0.98843	0	0	0.88064	0.84928	2.4306	1.1168	0	4.0948	2.384	2.3702	2.3453	1.9386	2.8619	1.8851	0	0	0	0.329477	1.38684	1.7372	2.3665	2.22853	0	0.57067	0.904059	2.11672	0.0196135	0.549164	0	0.313075	0.00177742	0	2003	1322									KOG1342	Histone deacetylase complex, catalytic component RPD3	Chromatin structure and dymics	INFORMATION STORAGE AND PROCESSING	_GAP_||PF00850||_GAP_
contig_148605_57_719_+	1374	1.9769	0.97947	0	0	0	0	0	1.1027	2.0474	0.79465	0.79006	0	0	0.95395	0.94256	0	0	0	0.985457	0	1.05003	0.528237	0.63217	0	0.988464	0	1.02472	0.457472	0.547505	0	-0.106267	0	0	1723	663
contig_148957_1_938_-	1374	0	0	0	0	0	0	0	0	0	0	0	0	1.9386	0	1.8851	0	0	0	0	0	0	0	1.27457	0	0	0	0	0	1.10413	0	-1.39578	0	1	1220	938	smm:Smp_157010	titin						C4QER8
contig_149031_1_1002_-	1374	0	0	0	0	0	0	1.1168	1.1027	2.0474	0	0.79006	0	0.96928	0	0.94256	0	0	0	0	0	1.4223	0.263353	0.63728	0	0	0	0.541398	0.456141	0.552062	0	-0.764074	0	0.969639	1125	1002													PF00933||_GAP_||PF01915
contig_15432_380_967_-	1374	1.9769	0.97947	1.0232	0	0	0	0	0	0	3.1786	1.5801	2.3453	0.96928	0.95395	0	0	1.7735	0	1.32652	0	0	2.368	0.641077	0.591167	0.563667	0	0	0.799492	0.555242	1.02393	0.252835	1.84e-05	0	967	588	pti:PHATRDRAFT_46064	hypothetical protein						B7FZX5
contig_15500_379_945_-	1374	1.9769	1.9589	2.0464	2.6419	1.6986	0.81019	3.3504	1.1027	2.0474	1.5893	1.5801	1.5636	0.96928	1.9079	1.8851	0	1.7735	1.7178	1.99407	1.7169	2.16683	1.57767	1.58743	1.16377	0.046207	0.915992	1.1286	0.0130216	0.535452	1.00824	0.147898	1.84e-06	0	1096	567
contig_15534_79_906_-	1374	2.9653	0	2.0464	0	0	0	0	0	0	0	0	0	0	0	0	0	0	0	1.67057	0	0	0	0	0	1.51796	0	0	0	0	0	0.00608803	0	0	964	828
contig_155853_1_838_+	1374	1.9769	1.9589	2.0464	0	0.84928	0.81019	0	0	0	0	0	0.78178	0.96928	0.95395	0	0	0	0	1.99407	0.553157	0	0.260593	0.641077	0	0.046207	0.479446	0	0.451361	0.555242	0	0.109153	0	0	1054	838	pti:PHATR_44015	hypothetical protein						B5Y533
contig_155889_145_1125_+	1374	1.9769	1.9589	3.0696	2.6419	1.6986	2.4306	1.1168	2.2054	2.0474	1.5893	1.5801	2.3453	0	0.95395	0	0	0	0	2.33513	2.25703	1.78987	1.83823	0.317983	0	0.63613	0.495023	0.588222	0.439157	0.550763	0	0.519627	0.996161	0	1179	981	nve:NEMVE_v1g242138	hypothetical protein ; K10364 capping protein (actin filament) muscle Z-line, alpha		K10364	capping protein (actin filament) muscle Z-line, alpha			A7S181	KOG0836	F-actin capping protein, alpha subunit	Cytoskeleton	CELLULAR PROCESSES AND SIGLING	PF01267||_GAP_
contig_156088_206_706_-	1374	0	0	0	0	0	0	0	0	0	0.79465	1.5801	1.5636	0	0	0	0	0	0	0	0	0	1.31278	0	0	0	0	0	0.448792	0	0	1.18794	1	0	794	501	tps:THAPSDRAFT_22656	hypothetical protein						B8C2E2
contig_156254_235_875_-	1374	0	0	0	1.7613	0.84928	1.6204	2.2336	1.1027	2.0474	0.79465	1.5801	1.5636	0	0	0	0	0	0	0	1.41033	1.79457	1.31278	0	0	0	0.490962	0.606364	0.448792	0	0	0.83275	1	0	875	641
contig_156356_243_2110_-	1374	0	0	0	0	0	0	0	0	0	0	0	0	1.9386	1.9079	0.94256	0	0	0	0	0	0	0	1.59635	0	0	0	0	0	0.56641	0	-0.571299	0	1	2316	1868	olu:OSTLU_25572	hypothetical protein						A4S801
contig_156478_233_829_-	1374	0.98843	0	0	0	0	0	2.2336	2.2054	1.0237	0	0	0	0.96928	0.95395	1.8851	0	0	0	0.329477	0	1.8209	0	1.26944	0	0.57067	0	0.690539	0	0.533229	0	-0.583704	0	0.961961	1061	597	nve:NEMVE_v1g246231	hypothetical protein ; K08059 interferon, gamma-inducible protein 30		K08059	interferon, gamma-inducible protein 30	Antigen processing and presentation		A7SMR3	KOG3160	Gamma-interferon inducible lysosomal thiol reductase	Posttranslatiol modification, protein turnover, chaperones	CELLULAR PROCESSES AND SIGLING	PF03227||_GAP_
contig_156584_58_996_+	1374	0	0.97947	0	1.7613	0.84928	0.81019	0	0	0	0	0	0	0	0	0	0	0	0	0.32649	1.14026	0	0	0	0	0.565497	0.538194	0	0	0	0	0.0386464	0	0	1244	939
contig_156738_43_588_+	1374	2.9653	1.9589	2.0464	0.88064	0.84928	0.81019	0	0	0	0	0.79006	0	0	0	0	0	0	0	2.32353	0.846703	0	0.263353	0	0	0.557506	0.0352956	0	0.456141	0	0	0.429804	0.597869	0	819	546
contig_156759_151_600_-	1374	1.9769	1.9589	2.0464	1.7613	1.6986	1.6204	0	0	0	1.5893	3.1602	1.5636	0	0	0	0	0	0	1.99407	1.69343	0	2.10437	0	0	0.046207	0.0705919	0	0.914469	0	0	1.25203	1	0	666	450
contig_156776_323_895_-	1374	0.98843	0.97947	1.0232	0.88064	1.6986	1.6204	1.1168	1.1027	1.0237	0.79465	0.79006	0.78178	1.9386	1.9079	1.8851	0	0	0	0.997033	1.39988	1.08107	0.78883	1.91053	0	0.0230996	0.451372	0.0501787	0.00652257	0.026847	0	0.538761	0.940293	0	1422	573	pti:PHATRDRAFT_3834	hypothetical protein						B7G4C9					PF00481
contig_156838_230_539_-	1374	0.98843	0.97947	1.0232	0	0	1.6204	0	0	0	0.79465	1.5801	0.78178	0	0	0	0	0	0	0.997033	0.540133	0	1.05218	0	0	0.0230996	0.935538	0	0.45724	0	0	0.594515	0.884878	1.26e-11	539	310
contig_156909_169_1209_+	1374	1.9769	1.9589	1.0232	1.7613	1.6986	2.4306	3.3504	2.2054	0	1.5893	0.79006	0.78178	1.9386	2.8619	1.8851	0	0	0	1.653	1.9635	1.85193	1.05371	2.22853	0	0.545497	0.405733	1.70294	0.46385	0.549164	0	0.334966	0.113151	0	2470	1041													PF02729||PF00185||_GAP_
contig_156991_110_833_-	1374	0	0	0	1.7613	0.84928	0.81019	0	0	0	0.79465	0.79006	0.78178	0	0	0	0	0	0	0	1.14026	0	0.78883	0	0	0	0.538194	0	0.00652257	0	0	0.0187622	0	0	833	724									KOG0381	HMG box-containing protein	General function prediction only	POORLY CHARACTERIZED	_GAP_||PF00505
contig_157052_994_1878_-	1374	2.9653	1.9589	2.0464	0	0	0	2.2336	2.2054	3.0711	2.384	3.1602	1.5636	1.9386	0.95395	2.8277	1.744	1.7735	1.7178	2.32353	0	2.50337	2.36927	1.90675	1.7451	0.557506	0	0.491874	0.798402	0.937281	0.0278663	-0.406595	0	0.508099	2228	885	cak:Caul_3102	peptidase S9 prolyl oligopeptidase						B0T1P0					_GAP_||PF07676||_GAP_
contig_157177_1_801_+	1374	1.9769	1.9589	2.0464	1.7613	1.6986	1.6204	2.2336	2.2054	1.0237	1.5893	1.5801	2.3453	1.9386	0.95395	1.8851	0	1.7735	1.7178	1.99407	1.69343	1.8209	1.83823	1.59255	1.16377	0.046207	0.0705919	0.690539	0.439157	0.55369	1.00824	0.726616	0.999983	0	951	801									KOG1615	Phosphoserine phosphatase	Amino acid transport and metabolism	METABOLISM	_GAP_||PF12710||_GAP_
contig_157213_262_867_-	1374	1.9769	1.9589	2.0464	0.88064	1.6986	0	0	0	1.0237	2.384	1.5801	1.5636	1.9386	0.95395	1.8851	0	1.7735	0	1.99407	0.859747	0.341233	1.84257	1.59255	0.591167	0.046207	0.849493	0.591033	0.468968	0.55369	1.02393	0.809767	0.999998	0	915	606
contig_157394_382_894_-	1374	1.9769	1.9589	3.0696	2.6419	2.5478	2.4306	2.2336	2.2054	3.0711	3.1786	2.3702	1.5636	1.9386	1.9079	1.8851	1.744	1.7735	1.7178	2.33513	2.5401	2.50337	2.3708	1.91053	1.7451	0.63613	0.10586	0.491874	0.8075	0.026847	0.0278663	0.346314	0.0353457	0	1896	513	syp:SYNPCC7002_A2665	prk; phosphoribulokise; K00855 phosphoribulokise [EC:2.7.1.19]	syp00710||syp01100||syp01120	K00855	phosphoribulokise [EC:2.7.1.19]	Carbon fixation in photosynthetic organisms || Carbon metabolism	2.7.1.19	B1XLW8	KOG4203	Armadillo/beta-Catenin/plakoglobin	Sigl transduction mechanisms	CELLULAR PROCESSES AND SIGLING	PF00485||_GAP_
contig_157399_1077_1889_+	1374	0	0	0	0	0	0	0	0	0	0	0	0	2.9078	2.8619	2.8277	0	0	0	0	0	0	0	2.8658	0	0	0	0	0	0.0401922	0	-0.232074	0	0.0604923	2085	813
contig_157399_76_1074_+	1374	0	0	0	0	0	0	0	0	0	0	0	0	0.96928	1.9079	1.8851	0	0	0	0	0	0	0	1.58743	0	0	0	0	0	0.535452	0	-0.186852	1.1e-06	0.0458923	2085	999
contig_157571_1648_2058_+	1374	0	0	0	0	0	0	0	1.1027	2.0474	1.5893	0	0.78178	0.96928	0.95395	1.8851	0	0	0	0	0	1.05003	0.79036	1.26944	0	0	0	1.02472	0.794685	0.533229	0	0.360316	0.35934	0	2537	411	nfi:NFIA_028030	phosphoglycerate mutase family protein, putative						A1DD19
contig_158_87_603_+	1374	0	0.97947	2.0464	0.88064	1.6986	1.6204	1.1168	1.1027	0	0	0	0	0	0	0	0	0	0	1.00862	1.39988	0.739833	0	0	0	1.02351	0.451372	0.640753	0	0	0	0.273621	0.0345501	0	603	517													PF01417||_GAP_
contig_158267_897_1892_-	1374	0	0	0	0.88064	0.84928	0	0	0	0	0	0	0	0	0	1.8851	0	0	0	0	0.57664	0	0	0.628367	0	0	0.499631	0	0	1.08836	0	0.210458	0.000113305	0	2186	996
contig_158395_51_3027_+	1374	0	0	0	0.88064	0	0	0	0	0	0.79465	0	0	1.9386	2.8619	1.8851	0	0	0	0	0.293547	0	0.264883	2.22853	0	0	0.508438	0	0.458791	0.549164	0	-0.679687	0	1	3392	2977	son:SO_1872	putative lipoprotein						Q8EFU3
contig_158449_371_1051_+	1374	0	0	0	0	0	0	1.1168	0	3.0711	2.384	3.1602	3.1271	1.9386	0.95395	0.94256	0	0	0	0	0	1.39597	2.89043	1.27837	0	0	0	1.55447	0.438896	0.571804	0	0.651133	1	0	1337	681									KOG0378	40S ribosomal protein S4	Translation, ribosomal structure and biogenesis	INFORMATION STORAGE AND PROCESSING	PF08071||_GAP_||PF00900||PF00467
contig_158469_119_1521_+	1374	0.98843	0.97947	2.0464	0.88064	3.3971	2.4306	2.2336	1.1027	3.0711	1.5893	1.5801	1.5636	0.96928	0.95395	0	0	0	0	1.3381	2.23611	2.1358	1.57767	0.641077	0	0.613422	1.26945	0.987838	0.0130216	0.555242	0	-0.847151	0	1	2044	1403	ppp:PHYPADRAFT_44208	hypothetical protein											_GAP_||PF00246||_GAP_
contig_158505_1101_1888_-	1374	0.98843	0.97947	1.0232	0.88064	0	0	0	0	0	0	0	0	1.9386	0.95395	1.8851	0	0	0	0.997033	0.293547	0	0	1.59255	0	0.0230996	0.508438	0	0	0.55369	0	-1.64376	0	1	4251	788													_GAP_||PF13517||_GAP_
contig_158505_3992_4247_-	1374	2.9653	1.9589	3.0696	0	0	0	0	0	0	0	0	0	0	0	0	0	0	0	2.6646	0	0	0	0	0	0.613375	0	0	0	0	0	-1.20969	0	1	4251	256
contig_158614_853_1581_-	1374	2.9653	0.97947	1.0232	0	0	0	0	0	0	0.79465	2.3702	2.3453	0	0.95395	1.8851	0	0	0	1.65599	0	0	1.83672	0.94635	0	1.13411	0	0	0.902542	0.942573	0	0.68027	1	0	1582	729	geo:Geob_3090	peptidylprolyl isomerase FKBP-type		K01802	peptidylprolyl isomerase [EC:5.2.1.8]		5.2.1.8	B9M3L2	KOG0549	FKBP-type peptidyl-prolyl cis-trans isomerase	Posttranslatiol modification, protein turnover, chaperones	CELLULAR PROCESSES AND SIGLING	_GAP_||PF00254||_GAP_
contig_158833_139_903_-	1374	1.9769	1.9589	0	1.7613	0.84928	0.81019	0	0	0	0	0	0	0	0	0	0	0	0	1.31193	1.14026	0	0	0	0	1.1362	0.538194	0	0	0	0	-0.64006	0	1	1775	765
contig_158916_265_1637_-	1374	0.98843	1.9589	0	0.88064	0.84928	0	0	0	1.0237	0	0	0	0	0	0	0	0	0	0.982443	0.57664	0.341233	0	0	0	0.979464	0.499631	0.591033	0	0	0	-0.872838	0	1	1698	1373	isc:IscW_ISCW021469	Gaba-gated chloride channel, putative; K05270 gamma-aminobutyric acid (GABA) receptor, invertebrate	isc04080	K05181	gamma-aminobutyric acid receptor subunit beta	Neuroactive ligand-receptor interaction || Retrograde endocanbinoid sigling || Serotonergic sypse || GABAergic sypse || Morphine addiction || Nicotine addiction		B7Q4M3	KOG3642	GABA receptor	Sigl transduction mechanisms	CELLULAR PROCESSES AND SIGLING	_GAP_||PF02931||_GAP_
contig_158920_1_1953_+	1374	0	1.9589	2.0464	0	0	0	0	0	0	0	0	0	0	0	0	0	0	0	1.3351	0	0	0	0	0	1.15706	0	0	0	0	0	-0.611726	0	1	2089	1953	pti:PHATRDRAFT_43603	hypothetical protein						B7FSU0
contig_159148_1134_2147_+	1374	0.98843	0.97947	1.0232	0.88064	0.84928	1.6204	0	0	1.0237	0.79465	0	0	0	0	0.94256	0	0	0	0.997033	1.11677	0.341233	0.264883	0.314187	0	0.0230996	0.436435	0.591033	0.458791	0.544187	0	-0.618663	0	1	3941	1014	rpc:RPC_0863	hypothetical protein						Q21B03					_GAP_||PF03407||_GAP_
contig_159314_1_631_+	1374	2.9653	1.9589	3.0696	1.7613	1.6986	2.4306	0	1.1027	1.0237	0	0	0	0	0	0	0	0	0	2.6646	1.9635	0.7088	0	0	0	0.613375	0.405733	0.615108	0	0	0	0.903039	1	0	665	631									KOG0027	Calmodulin and related proteins (EF-Hand superfamily)	Sigl transduction mechanisms	CELLULAR PROCESSES AND SIGLING	_GAP_||PF13405||_GAP_
contig_159516_17_856_+	1374	0	0.97947	0	0	0	0	1.1168	1.1027	1.0237	1.5893	0.79006	1.5636	0	0	0.94256	0	0	0	0.32649	0	1.08107	1.31432	0.314187	0	0.565497	0	0.0501787	0.454204	0.544187	0	0.536429	0.988123	0	1057	840													PF08450
contig_15962_126_812_-	1374	0	0	0	0	0	0	0	0	0	0	0	1.5636	0	0	0	0	0	0	0	0	0	0.5212	0	0	0	0	0	0.902745	0	0	1.02369	1	0	856	687	pti:PHATRDRAFT_17766	Lhcr4; protein fucoxanthin chlorophyll a/c protein						B7FQE1					_GAP_||PF00504||_GAP_
contig_159798_51_1007_+	1374	0	0	0	0	0	0	0	0	0	0	0	0	1.9386	0	0.94256	0	1.7735	0	0	0	0	0	0.960387	0.591167	0	0	0	0	0.969423	1.02393	0.1912	7.53e-06	0	1396	957
contig_159922_1_1010_+	1374	0.98843	0	0	0.88064	0	0	1.1168	0	0	0.79465	0	2.3453	0.96928	0	0.94256	0	0	0	0.329477	0.293547	0.372267	1.04665	0.63728	0	0.57067	0.508438	0.644785	1.19278	0.552062	0	-0.326504	0	0.25825	1590	1010									KOG1402	Ornithine aminotransferase	Amino acid transport and metabolism	METABOLISM	_GAP_||PF00202
contig_159967_1_1111_+	1374	0	0.97947	0	0	0	0.81019	1.1168	1.1027	2.0474	0	0	0	0.96928	0	0	0	0	0	0.32649	0.270063	1.4223	0	0.323093	0	0.565497	0.467763	0.541398	0	0.559614	0	-0.537745	0	1	1942	1111									KOG1567	Ribonucleotide reductase, beta subunit	Nucleotide transport and metabolism	METABOLISM	_GAP_||PF00268||_GAP_
contig_159967_1436_1941_-	1374	0.98843	0.97947	1.0232	0.88064	0	0	0	0	0	0.79465	0.79006	2.3453	0	0	0	0	0	0	0.997033	0.293547	0	1.31	0	0	0.0230996	0.508438	0	0.896596	0	0	0.768837	1	0	1942	506	mrd:Mrad2831_1124	glutaredoxin-like protein; K07390 monothiol glutaredoxin		K07390	monothiol glutaredoxin			B1M1U8					_GAP_||PF00462
contig_159981_1877_2851_-	1374	0.98843	1.9589	2.0464	2.6419	2.5478	1.6204	0	1.1027	1.0237	0	0	0	0	0	0	0	0	0	1.66458	2.27003	0.7088	0	0	0	0.587192	0.564563	0.615108	0	0	0	-3.84148	0	1	3298	975	pti:PHATR_46929	hypothetical protein						B5Y488
contig_160694_35_786_-	1374	1.9769	0.97947	1.0232	0	1.6986	3.2408	2.2336	3.3081	3.0711	1.5893	2.3702	3.9089	2.9078	2.8619	2.8277	0	0	0	1.32652	1.64647	2.87093	2.6228	2.8658	0	0.563667	1.62103	0.564524	1.18025	0.0401922	0	0.904607	1	0	786	752	ppp:PHYPADRAFT_184238	hypothetical protein; K02727 20S proteasome subunit alpha 7 [EC:3.4.25.1]	ppp03050	K02727	20S proteasome subunit alpha 7 [EC:3.4.25.1]	Proteasome	3.4.25.1	A9SF12	KOG0184	20S proteasome, regulatory subunit alpha type PSMA3/PRE10	Posttranslatiol modification, protein turnover, chaperones	CELLULAR PROCESSES AND SIGLING	PF10584||PF00227||_GAP_
contig_160823_203_1209_-	1374	0	0	0	0.88064	0.84928	0.81019	0	0	1.0237	1.5893	1.5801	1.5636	0	1.9079	0	0	0	0	0	0.846703	0.341233	1.57767	0.635967	0	0	0.0352956	0.591033	0.0130216	1.10153	0	0.79134	0.999999	0	2775	1007	ota:Ot08g04200	Predicted dehydrogese (ISS)						Q012M2					_GAP_||PF13460||_GAP_
contig_16084_333_849_-	1374	0.98843	0.97947	1.0232	0	1.6986	0.81019	0	0	2.0474	1.5893	0	0.78178	2.9078	2.8619	1.8851	0	0	0	0.997033	0.836263	0.682467	0.79036	2.5516	0	0.0230996	0.8496	1.18207	0.794685	0.577662	0	-0.205169	0	0	849	517
contig_160851_937_1612_-	1374	0	0	0	0	0	0	0	0	0	0.79465	1.5801	0.78178	0	0	0	0	0	0	0	0	0	1.05218	0	0	0	0	0	0.45724	0	0	-0.174403	0	0.00345968	1613	676									KOG2670	Enolase	Carbohydrate transport and metabolism	METABOLISM	_GAP_||PF03952||PF00113
contig_160875_1707_3909_-	1374	0.98843	0.97947	1.0232	3.5225	2.5478	0.81019	1.1168	0	1.0237	0	0	0	0	0	0	0	0	0	0.997033	2.2935	0.7135	0	0	0	0.0230996	1.37392	0.61966	0	0	0	-4.8447	0	1	4931	2203	scl:sce2643	hypothetical protein						A9G7B0
contig_161241_170_2529_-	1374	0	0	0	0	0	0	1.1168	1.1027	0	0.79465	0	0.78178	2.9078	2.8619	1.8851	0	0	0	0	0	0.739833	0.525477	2.5516	0	0	0	0.640753	0.455122	0.577662	0	-0.295153	0	0.0462827	2531	2360	rlg:Rleg_6037	glycoside hydrolase family 37						C6BA53
contig_161277_27_1135_+	1374	0	0	0	0.88064	0.84928	0.81019	0	1.1027	1.0237	0.79465	0.79006	1.5636	1.9386	1.9079	2.8277	0	0	1.7178	0	0.846703	0.7088	1.04944	2.22473	0.5726	0	0.0352956	0.615108	0.445284	0.52241	0.991772	0.331545	0.0356592	0	1403	1109													_GAP_||PF00218||_GAP_
contig_161278_1547_1963_+	1374	0.98843	0.97947	1.0232	0.88064	0.84928	0.81019	0	0	0	0.79465	0.79006	0.78178	0.96928	1.9079	0.94256	0	0	0	0.997033	0.846703	0	0.78883	1.27325	0	0.0230996	0.0352956	0	0.00652257	0.549788	0	-1.29135	0	1	2097	417	spo:SPCC191.07	cyc1; cytochrome c (predicted); K08738 cytochrome c		K08738	cytochrome c	Sulfur metabolism || Two-component system || p53 sigling pathway || Apoptosis || Non-alcoholic fatty liver disease (FLD) || Alzheimer's disease || Parkinson's disease || Amyotrophic lateral sclerosis (ALS) || Huntington's disease || Legionellosis || Toxoplasmosis || Tuberculosis || Hepatitis B || Influenza A || Herpes simplex infection || Pathways in cancer || Colorectal cancer || Small cell lung…		P00046	KOG3453	Cytochrome c	Energy production and conversion	METABOLISM	_GAP_||PF00034
contig_16148_136_513_-	1374	0	0	0	0	0	0	0	0	0	0	0	0	0	0	0	5.2321	1.7735	1.7178	0	0	0	0	0	2.9078	0	0	0	0	0	2.0131	0.858257	1	0	513	378	olu:OSTLU_9941	hypothetical protein						A4RUH7					_GAP_||PF00830
contig_161541_1_1344_+	1374	0.98843	0	0	0	0	0.81019	2.2336	1.1027	0	0	0	0	0	0	0	0	0	0	0.329477	0.270063	1.1121	0	0	0	0.57067	0.467763	1.11683	0	0	0	-0.673973	0	0.994013	1429	1344
contig_161870_201_897_-	1374	0.98843	0.97947	0	1.7613	1.6986	1.6204	4.4672	1.1027	3.0711	2.384	0.79006	0.78178	0	0	0.94256	0	0	1.7178	0.655967	1.69343	2.88033	1.31861	0.314187	0.5726	0.568101	0.0705919	1.69034	0.922661	0.544187	0.991772	0.300511	0.180155	0	897	697
contig_162086_212_931_-	1374	0	0	0	0	0	0	1.1168	1.1027	1.0237	0	0	0	0.96928	0.95395	1.8851	0	0	1.7178	0	0	1.08107	0	1.26944	0.5726	0	0	0.0501787	0	0.533229	0.991772	0.206549	1.19e-05	0	931	720									KOG0027	Calmodulin and related proteins (EF-Hand superfamily)	Sigl transduction mechanisms	CELLULAR PROCESSES AND SIGLING	_GAP_||PF13499||PF00036||_GAP_||PF13499
contig_162224_204_854_-	1374	1.9769	0.97947	1.0232	3.5225	2.5478	2.4306	0	0	0	2.384	2.3702	3.1271	0	0	0	0	0	0	1.32652	2.83363	0	2.6271	0	0	0.563667	0.599447	0	0.433068	0	0	0.370042	0.227726	0	902	651
contig_162271_188_868_-	1374	0	0	0	0	0	0	0	0	0	0	0.79006	0	1.9386	0.95395	0.94256	0	0	1.7178	0	0	0	0.263353	1.27837	0.5726	0	0	0	0.456141	0.571804	0.991772	0.20883	0.00494976	0	2457	681	tad:TRIADDRAFT_59472	hypothetical protein						B3S5T8					PF00051||_GAP_||PF00066||_GAP_
contig_162292_267_953_-	1374	0.98843	0	1.0232	1.7613	2.5478	2.4306	1.1168	1.1027	1.0237	0.79465	0.79006	0.78178	0	0	0	0	0	0	0.670543	2.24657	1.08107	0.78883	0	0	0.580968	0.424319	0.0501787	0.00652257	0	0	0.603832	1	0	3331	687
contig_162305_1_988_+	1374	0	0	1.0232	0	0	0	0	0	1.0237	1.5893	1.5801	1.5636	0.96928	1.9079	1.8851	3.4881	1.7735	3.4355	0.341067	0	0.341233	1.57767	1.58743	2.89903	0.590745	0	0.591033	0.0130216	0.535452	0.975095	0.0863333	0	0	1288	988	tps:THAPSDRAFT_3560	hypothetical protein						B8BY48
contig_162328_1_1611_+	1374	1.9769	0.97947	1.0232	0	0	0	0	0	0	0	0	0	0	0	0	0	0	0	1.32652	0	0	0	0	0	0.563667	0	0	0	0	0	0.0350825	0	0	2118	1611	pti:PHATRDRAFT_30113	pDLDH1; lipoamide dehydrogese (EC:1.8.1.4); K00382 dihydrolipoamide dehydrogese [EC:1.8.1.4]	pti01100||pti00280||pti00260||pti00020||pti00010||pti01110||pti00620	K00382	dihydrolipoamide dehydrogese [EC:1.8.1.4]	Glycolysis / Gluconeogenesis || Citrate cycle (TCA cycle) || Glycine, serine and threonine metabolism || Valine, leucine and isoleucine degradation || Pyruvate metabolism || Carbon metabolism	1.8.1.4	B7G9G3					_GAP_||PF07992||PF02852
contig_162387_237_1903_-	1374	0.98843	0.97947	0	1.7613	2.5478	1.6204	0	0	0	0	0	0	0.96928	1.9079	1.8851	0	0	0	0.655967	1.9765	0	0	1.58743	0	0.568101	0.499751	0	0	0.535452	0	0.849165	1	0	2005	1667	olu:OSTLU_31762	hypothetical protein						A4RXP0					_GAP_||PF13499||_GAP_
contig_162422_337_978_-	1374	0	0	0	0.88064	0	0	0	0	0	0	1.5801	0.78178	0.96928	0	0	0	0	0	0	0.293547	0	0.787293	0.323093	0	0	0.508438	0	0.790064	0.559614	0	0.0296215	0	0	1950	642	ppp:PHYPADRAFT_129878	hypothetical protein; K00600 glycine hydroxymethyltransferase [EC:2.1.2.1]	ppp01110||ppp00460||ppp00670||ppp00260||ppp01100	K00600	glycine hydroxymethyltransferase [EC:2.1.2.1]	Glycine, serine and threonine metabolism || Cyanoamino acid metabolism || Glyoxylate and dicarboxylate metabolism || One carbon pool by folate || Methane metabolism || Carbon metabolism || Biosynthesis of amino acids	2.1.2.1	A9SHC0	KOG2467	Glycine/serine hydroxymethyltransferase	Amino acid transport and metabolism	METABOLISM	PF00464||_GAP_
contig_162512_334_2212_+	1374	0	0	0	0	0	0	0	0	0	0.79465	0.79006	0	2.9078	1.9079	2.8277	0	1.7735	0	0	0	0	0.528237	2.5478	0.591167	0	0	0	0.457472	0.555615	1.02393	-0.0151229	0	0	2423	1879													PF00246||_GAP_
contig_16262_280_657_-	1374	1.9769	2.9384	2.0464	0.88064	0.84928	1.6204	0	1.1027	1.0237	1.5893	0.79006	1.5636	0	0	0	0	0	0	2.32057	1.11677	0.7088	1.31432	0	0	0.536187	0.436435	0.615108	0.454204	0	0	0.31924	0.0866162	0	1027	378	tet:TTHERM_00442830	Protein kise domain containing protein							KOG0027	Calmodulin and related proteins (EF-Hand superfamily)	Sigl transduction mechanisms	CELLULAR PROCESSES AND SIGLING	_GAP_||PF13499
contig_162971_1_583_+	1374	0	0	0	0	0	0	2.2336	2.2054	3.0711	1.5893	1.5801	0.78178	2.9078	0.95395	1.8851	1.744	1.7735	1.7178	0	0	2.50337	1.31706	1.91562	1.7451	0	0	0.491874	0.463589	0.977282	0.0278663	0.177653	0.0566999	4.97e-05	721	583	tps:THAPSDRAFT_923	hypothetical protein						B8BSU3
contig_163056_119_696_-	1374	0	0	0	0.88064	0.84928	0.81019	0	0	0	0.79465	1.5801	0.78178	0.96928	0.95395	0	0	0	0	0	0.846703	0	1.05218	0.641077	0	0	0.0352956	0	0.45724	0.555242	0	0.993562	1	0	696	578
contig_163671_45_629_+	1374	0.98843	0.97947	1.0232	0.88064	0.84928	1.6204	0	0	0	0	0.79006	1.5636	0	0.95395	0.94256	0	0	0	0.997033	1.11677	0	0.784553	0.63217	0	0.0230996	0.436435	0	0.781815	0.547505	0	0.277012	0.00109968	0	829	585	tps:THAPSDRAFT_10088	hypothetical protein						B8CD59
contig_163823_87_737_+	1374	2.9653	1.9589	3.0696	1.7613	1.6986	1.6204	2.2336	2.2054	4.0948	1.5893	1.5801	0.78178	2.9078	2.8619	1.8851	1.744	0	1.7178	2.6646	1.69343	2.8446	1.31706	2.5516	1.15393	0.613375	0.0705919	1.0828	0.463589	0.577662	0.999421	0.200104	0.0695537	1.08e-05	973	651
contig_163888_34_501_+	1374	0	0	0	0	0	0.81019	0	0	0	1.5893	1.5801	2.3453	0.96928	0.95395	1.8851	1.744	1.7735	1.7178	0	0.270063	0	1.83823	1.26944	1.7451	0	0.467763	0	0.439157	0.533229	0.0278663	1.09689	1	0	877	468
contig_164169_1_787_+	1374	0	1.9589	2.0464	0	0	0	0	0	0	0.79465	0.79006	0.78178	0	0	0	0	0	0	1.3351	0	0	0.78883	0	0	1.15706	0	0	0.00652257	0	0	0.469989	0.968631	0	825	787									KOG4308	LRR-containing protein	Function unknown	POORLY CHARACTERIZED	_GAP_||PF13516||_GAP_
contig_164219_224_460_-	1374	0.98843	1.9589	3.0696	0.88064	1.6986	1.6204	1.1168	2.2054	1.0237	0	0	0	0.96928	0	0	0	0	0	2.00564	1.39988	1.44863	0	0.323093	0	1.04137	0.451372	0.65703	0	0.559614	0	0.109103	0	0	634	237
contig_164422_1_146_+	1374	0	0.97947	0	0.88064	0	0	0	1.1027	0	3.9733	1.5801	1.5636	1.9386	1.9079	2.8277	0	1.7735	0	0.32649	0.293547	0.367567	2.37233	2.22473	0.591167	0.565497	0.508438	0.636644	1.3865	0.52241	1.02393	0.88808	1	0	1404	146									KOG3499	60S ribosomal protein L38	Translation, ribosomal structure and biogenesis	INFORMATION STORAGE AND PROCESSING	PF01781
contig_164451_259_954_-	1374	1.9769	1.9589	2.0464	0	1.6986	0.81019	1.1168	0	0	0.79465	1.5801	1.5636	0	0	0	0	0	0	1.99407	0.836263	0.372267	1.31278	0	0	0.046207	0.8496	0.644785	0.448792	0	0	0.649477	1	0	1273	696	pti:PHATRDRAFT_10747	hypothetical protein						B7FUD8	KOG1203	Predicted dehydrogese	Carbohydrate transport and metabolism	METABOLISM	PF13460
contig_165577_1_1340_+	1374	0	0	0	0.88064	1.6986	0	0	0	0	0	0.79006	0.78178	0.96928	0.95395	0.94256	0	0	0	0	0.859747	0	0.523947	0.955263	0	0	0.849493	0	0.45377	0.0134083	0	0.138817	0.000833469	0	1528	1340	tps:THAPSDRAFT_263365	hypothetical protein						B8C6M9					_GAP_||PF07228||PF00595||_GAP_
contig_166579_687_983_-	1374	0.98843	1.9589	2.0464	2.6419	1.6986	1.6204	1.1168	1.1027	1.0237	2.384	2.3702	1.5636	0	0	0	0	0	0	1.66458	1.98697	1.08107	2.10593	0	0	0.587192	0.568535	0.0501787	0.469725	0	0	0.479286	0.98963	0	1293	297
contig_166940_84_1336_+	1374	2.9653	2.9384	3.0696	1.7613	1.6986	0.81019	0	0	0	0.79465	1.5801	0.78178	0	0	0	0	0	0	2.9911	1.42336	0	1.05218	0	0	0.0693007	0.531948	0	0.45724	0	0	0.621771	0.99718	0	1500	1253
contig_167138_246_716_-	1374	2.9653	1.9589	2.0464	1.7613	2.5478	2.4306	0	0	0	2.384	1.5801	0.78178	0	0	0	0	0	0	2.32353	2.24657	0	1.58196	0	0	0.557506	0.424319	0	0.801112	0	0	0.91887	1	0	798	471	pti:PHATRDRAFT_35301	hypothetical protein						B7FY47
contig_167292_1_798_+	1374	0.98843	0.97947	1.0232	0.88064	0.84928	0.81019	0	1.1027	1.0237	1.5893	1.5801	3.1271	2.9078	2.8619	2.8277	0	0	1.7178	0.997033	0.846703	0.7088	2.09883	2.8658	0.5726	0.0230996	0.0352956	0.615108	0.890517	0.0401922	0.991772	0.319003	0.0789757	0	897	798
contig_16734_77_919_+	1374	1.9769	0	1.0232	0	1.6986	0	1.1168	2.2054	3.0711	1.5893	0.79006	1.5636	0.96928	0.95395	0.94256	0	0	0	1.00003	0.5662	2.1311	1.31432	0.955263	0	0.988654	0.980687	0.979266	0.454204	0.0134083	0	0.316783	0.0119924	0	1099	843													_GAP_||PF09451
contig_167723_77_680_-	1374	1.9769	0.97947	1.0232	0.88064	0.84928	0.81019	0	0	0	0	2.3702	1.5636	0	0	0	0	0	0	1.32652	0.846703	0	1.31127	0	0	0.563667	0.0352956	0	1.20508	0	0	0.126808	0.00137454	0	680	604
contig_167749_50_688_+	1374	1.9769	0	3.0696	0	0	0	0	0	0	1.5893	1.5801	0.78178	0	0	0	0	0	0	1.68217	0	0	1.31706	0	0	1.55588	0	0	0.463589	0	0	0.948555	1	0	911	639	tps:THAPSDRAFT_263658	hypothetical protein						B8C9C4					_GAP_||PF05419
contig_167818_1_437_+	1374	0.98843	1.9589	2.0464	0.88064	0.84928	0.81019	0	0	0	1.5893	3.1602	3.1271	0	0	0	0	0	0	1.66458	0.846703	0	2.62553	0	0	0.587192	0.0352956	0	0.897557	0	0	0.829112	1	0	789	437
contig_16801_124_628_-	1374	0	0	0	0.88064	1.6986	0	0	0	1.0237	0.79465	0.79006	1.5636	0	0	0	0	0	0	0	0.859747	0.341233	1.04944	0	0	0	0.849493	0.591033	0.445284	0	0	0.731439	1	0	628	505									KOG3048	Molecular chaperone Prefoldin, subunit 5	Posttranslatiol modification, protein turnover, chaperones	CELLULAR PROCESSES AND SIGLING	_GAP_||PF02996
contig_168090_475_1307_+	1374	0	0.97947	1.0232	0.88064	1.6986	0.81019	0	0	0	0	0	0	0	0	0	0	0	0	0.667557	1.12981	0	0	0	0	0.578534	0.493844	0	0	0	0	1.178	1	0	1507	833									KOG3124	Pyrroline-5-carboxylate reductase	Amino acid transport and metabolism	METABOLISM	PF03807||_GAP_||PF14748
contig_168272_177_908_-	1374	0.98843	0.97947	1.0232	0	0	0	0	0	0	2.384	1.5801	2.3453	0	0	0	0	0	0	0.997033	0	0	2.10313	0	0	0.0230996	0	0	0.453373	0	0	0.229125	0.0272479	0	1061	732	fps:FP0015	sprD; putative cell surface protein precursor SprD						A6GVL2
contig_168297_26_754_+	1374	1.9769	2.9384	2.0464	0.88064	0.84928	0.81019	0	0	0	0	0	0	0	0	0	0	0	0	2.32057	0.846703	0	0	0	0	0.536187	0.0352956	0	0	0	0	0.38213	0.4485	1.23e-06	754	729	cfi:Celf_0435	cold-shock D-binding domain-containing protein		K03704	cold shock protein (beta-ribbon, CspA family)								_GAP_||PF00313
contig_168878_152_574_+	1374	2.9653	1.9589	3.0696	0.88064	0.84928	1.6204	0	0	0	2.384	2.3702	1.5636	0	0	0	0	0	0	2.6646	1.11677	0	2.10593	0	0	0.613375	0.436435	0	0.469725	0	0	0.297376	0.351663	0.0079369	574	423
contig_169729_1_355_+	1374	0	0	0	0	0	0	0	0	0	2.384	2.3702	1.5636	0	0	0	0	0	0	0	0	0	2.10593	0	0	0	0	0	0.469725	0	0	1.05832	1	0	530	355
contig_169880_86_358_+	1374	0	0.97947	0	0	0	0.81019	0	0	0	1.5893	1.5801	1.5636	0.96928	0	0	0	0	0	0.32649	0.270063	0	1.57767	0.323093	0	0.565497	0.467763	0	0.0130216	0.559614	0	1.26162	1	0	563	273	cre:CHLREDRAFT_149240	NUOB8; DH:ubiquinone oxidoreductase 11 kDa subunit; K03946 DH dehydrogese (ubiquinone) 1 alpha subcomplex 2 [EC:1.6.5.3 1.6.99.3]	cre00190||cre01100	K03946	DH dehydrogese (ubiquinone) 1 alpha subcomplex subunit 2	Oxidative phosphorylation || Non-alcoholic fatty liver disease (FLD) || Alzheimer's disease || Parkinson's disease || Huntington's disease	1.6.99.3||1.6.5.3	Q6V9A9	KOG3446	DH:ubiquinone oxidoreductase NDUFA2/B8 subunit	Energy production and conversion	METABOLISM	PF05047
contig_170680_1_627_+	1374	0.98843	0.97947	0	0	0.84928	0	0	0	0	0.79465	0.79006	1.5636	0	0	0	0	0	0	0.655967	0.283093	0	1.04944	0	0	0.568101	0.490332	0	0.445284	0	0	0.447064	0.654879	0	849	627
contig_171274_55_807_+	1374	0	0	0	0	0.84928	0	0	0	0	0.79465	1.5801	1.5636	0	0	0	0	0	0	0	0.283093	0	1.31278	0	0	0	0.490332	0	0.448792	0	0	0.466213	0.742271	0	952	753	fps:FP0015	sprD; putative cell surface protein precursor SprD						A6GVL2
contig_171499_83_526_+	1374	2.9653	1.9589	1.0232	0.88064	0.84928	0	0	0	0	0.79465	0.79006	0	0.96928	0	1.8851	0	0	0	1.98247	0.57664	0	0.528237	0.95146	0	0.971264	0.499631	0	0.457472	0.942676	0	1.13758	1	0	716	444	ddi:DDB_G0288319	arcE; actin related protein 2/3 complex, 16 kDa subunit; K05754 actin related protein 2/3 complex, subunit 5		K05754	actin related protein 2/3 complex, subunit 5	Fc gamma R-mediated phagocytosis || Regulation of actin cytoskeleton || Bacterial invasion of epithelial cells || Pathogenic Escherichia coli infection || Shigellosis || Salmonella infection		O96626	KOG3380	Actin-related protein Arp2/3 complex, subunit ARPC5	Cytoskeleton	CELLULAR PROCESSES AND SIGLING	PF04699
contig_171665_232_688_-	1374	1.9769	0	1.0232	0	0	0	0	0	0	0	0	0	0	0	0	0	0	0	1.00003	0	0	0	0	0	0.988654	0	0	0	0	0	-0.024679	9.21e-05	0.000648145	688	457
contig_172055_67_1017_+	1374	0.98843	1.9589	2.0464	0.88064	0.84928	0.81019	2.2336	1.1027	1.0237	1.5893	0.79006	1.5636	2.9078	2.8619	2.8277	0	1.7735	0	1.66458	0.846703	1.45333	1.31432	2.8658	0.591167	0.587192	0.0352956	0.676884	0.454204	0.0401922	1.02393	0.38612	0.343146	0	1300	951									KOG0015	Regulator of arginine metabolism and related MADS box-containing transcription factors	Transcription	INFORMATION STORAGE AND PROCESSING	_GAP_||PF00319||_GAP_
contig_172382_1_697_+	1374	1.9769	2.9384	3.0696	0	0.84928	0	0	1.1027	0	0.79465	0.79006	0.78178	0	0.95395	0.94256	1.744	1.7735	1.7178	2.66163	0.283093	0.367567	0.78883	0.63217	1.7451	0.596614	0.490332	0.636644	0.00652257	0.547505	0.0278663	-0.55482	0.000885771	0.696154	697	697
contig_17319_211_862_-	1374	0.98843	0	2.0464	1.7613	1.6986	0	3.3504	3.3081	1.0237	2.384	1.5801	2.3453	1.9386	2.8619	0	1.744	1.7735	3.4355	1.01161	1.1533	2.56073	2.10313	1.60017	2.31767	1.0234	0.999279	1.33128	0.453373	1.46066	0.968184	0.743467	0.999996	0	862	652													_GAP_||PF00584
contig_173263_54_735_-	1374	0	0	0	0	0	0.81019	1.1168	0	0	0	0	0	0.96928	2.8619	2.8277	0	0	0	0	0.270063	0.372267	0	2.21963	0	0	0.467763	0.644785	0	1.08297	0	0.21261	2.91e-05	0	735	682
contig_173321_1_501_-	1374	1.9769	1.9589	3.0696	1.7613	1.6986	2.4306	2.2336	2.2054	3.0711	1.5893	1.5801	0.78178	2.9078	2.8619	2.8277	1.744	3.5469	1.7178	2.33513	1.9635	2.50337	1.31706	2.8658	2.33623	0.63613	0.405733	0.491874	0.463589	0.0401922	1.04855	-0.648203	0	0.999999	536	501
contig_17762_1_748_+	1374	1.9769	0.97947	1.0232	0	0	0	0	0	0	0	0	0	0	0	0	0	0	0	1.32652	0	0	0	0	0	0.563667	0	0	0	0	0	0.859056	1	0	889	748									KOG2991	Splicing regulator	R processing and modification	INFORMATION STORAGE AND PROCESSING
contig_179264_1023_1424_+	1374	0.98843	0.97947	0	0.88064	1.6986	1.6204	1.1168	1.1027	1.0237	2.384	2.3702	3.1271	2.9078	2.8619	2.8277	0	0	1.7178	0.655967	1.39988	1.08107	2.6271	2.8658	0.5726	0.568101	0.451372	0.0501787	0.433068	0.0401922	0.991772	0.936915	1	0	2929	402	olu:OSTLU_28528	RPS3a; Ribosomal protein S3a, component of cytosolic 80S ribosome and 40S small subunit; K02984 small subunit ribosomal protein S3Ae	olu03010	K02984	small subunit ribosomal protein S3Ae	Ribosome		A4SAD2	KOG1628	40S ribosomal protein S3A	Translation, ribosomal structure and biogenesis	INFORMATION STORAGE AND PROCESSING	PF01015||_GAP_
contig_179282_1488_3342_-	1374	0	0	0	0	0	0	2.2336	1.1027	3.0711	0	0	0.78178	1.9386	1.9079	1.8851	1.744	1.7735	0	0	0	2.1358	0.260593	1.91053	1.1725	0	0	0.987838	0.451361	0.026847	1.01552	-0.31894	0	0.0510138	4536	1855	tps:THAPSDRAFT_34030	MAO1; D dependent malic enzyme (EC:1.1.1.39); K00029 malate dehydrogese (oxaloacetate-decarboxylating)(DP+) [EC:1.1.1.40]	tps01100||tps00620	K00029	malate dehydrogese (oxaloacetate-decarboxylating)(DP+) [EC:1.1.1.40]	Pyruvate metabolism || Carbon fixation in photosynthetic organisms || Carbon metabolism	1.1.1.40	B8C1Z0	KOG1257	DP+-dependent malic enzyme	Energy production and conversion	METABOLISM	_GAP_||PF00390||PF03949||_GAP_
contig_179339_1992_2690_-	1374	0.98843	0.97947	0	0.88064	0	0	0	0	1.0237	0	0	0	1.9386	0.95395	0.94256	0	0	0	0.655967	0.293547	0.341233	0	1.27837	0	0.568101	0.508438	0.591033	0	0.571804	0	-1.07454	0	0.999838	2778	699
contig_179364_750_1915_-	1374	0.98843	0.97947	1.0232	0.88064	2.5478	1.6204	0	0	0	0	0	0	0	0	0	0	0	0	0.997033	1.68295	0	0	0	0	0.0230996	0.835338	0	0	0	0	-0.328723	0	0	2698	1166
contig_179464_877_1869_-	1374	0	0	0	0	0	0	0	0	0	0.79465	0	1.5636	0	0	0	0	0	0	0	0	0	0.786083	0	0	0	0	0	0.781835	0	0	-0.105028	0	0	2942	993	olu:OSTLU_49504	hypothetical protein						A4RWE2	KOG2620	Prohibitins and stomatins of the PID superfamily	Energy production and conversion	METABOLISM	_GAP_||PF01145||_GAP_
contig_179534_1959_2969_-	1374	1.9769	0.97947	2.0464	1.7613	2.5478	1.6204	2.2336	1.1027	3.0711	0.79465	1.5801	0.78178	1.9386	1.9079	1.8851	1.744	1.7735	1.7178	1.66759	1.9765	2.1358	1.05218	1.91053	1.7451	0.596942	0.499751	0.987838	0.45724	0.026847	0.0278663	-1.78434	0	1	3019	1011	pti:PHATRDRAFT_49215	hypothetical protein						B7G9V1	KOG2353	L-type voltage-dependent Ca2+ channel, alpha2/delta subunit	Inorganic ion transport and metabolism	METABOLISM
contig_179606_2459_3797_-	1374	0	0	1.0232	1.7613	1.6986	1.6204	1.1168	0	2.0474	0	0	0	0	0	0	0	0	0	0.341067	1.69343	1.05473	0	0	0	0.590745	0.0705919	1.02511	0	0	0	-0.878565	0	1	3800	1339									KOG2650	Zinc carboxypeptidase	Function unknown	POORLY CHARACTERIZED	_GAP_||PF00246||_GAP_
contig_180261_121_592_+	1374	0	0	0	0	0	0	0	0	0	3.1786	2.3702	2.3453	0	0	0	0	0	0	0	0	0	2.63137	0	0	0	0	0	0.474081	0	0	0.165741	0	0	592	472	ppp:PHYPADRAFT_233731	hypothetical protein						A9SNV6					PF00504
contig_182259_216_418_-	1374	0.98843	0	1.0232	0.88064	0	0	3.3504	2.2054	1.0237	0.79465	0	0	0	0	0.94256	0	0	0	0.670543	0.293547	2.19317	0.264883	0.314187	0	0.580968	0.508438	1.1634	0.458791	0.544187	0
contig_184265_519_1141_-	1374	0.98843	0.97947	0	0.88064	1.6986	1.6204	0	0	0	1.5893	1.5801	1.5636	0	0	0	0	0	0	0.655967	1.39988	0	1.57767	0	0	0.568101	0.451372	0	0.0130216	0	0	0.456836	0.725919	0	1142	623
contig_184267_929_1927_-	1374	0.98843	0.97947	1.0232	1.7613	1.6986	1.6204	2.2336	2.2054	2.0474	1.5893	1.5801	1.5636	0.96928	0.95395	1.8851	0	0	0	0.997033	1.69343	2.16213	1.57767	1.26944	0	0.0230996	0.0705919	0.100357	0.0130216	0.533229	0	-0.00596576	8.66e-07	2.74e-06	2841	999
contig_184458_2272_2905_-	1374	1.9769	0.97947	2.0464	0.88064	1.6986	0.81019	1.1168	1.1027	0	2.384	1.5801	1.5636	2.9078	2.8619	2.8277	0	0	0	1.66759	1.12981	0.739833	1.84257	2.8658	0	0.596942	0.493844	0.640753	0.468968	0.0401922	0	0.537493	0.980301	0	2907	634
contig_184500_1_1350_+	1374	0.98843	0	0	0	0	0	0	0	0	0.79465	1.5801	0.78178	0	0	0	0	0	0	0.329477	0	0	1.05218	0	0	0.57067	0	0	0.45724	0	0	-0.0412903	0	0	3657	1350													_GAP_||PF02746||_GAP_||PF01188||PF13378||_GAP_
contig_184570_136_621_-	1374	0	0	0	0	0	0	1.1168	0	0	2.384	0.79006	1.5636	1.9386	1.9079	2.8277	1.744	0	0	0	0	0.372267	1.57922	2.22473	0.581333	0	0	0.644785	0.797085	0.52241	1.0069	0.942765	0.999997	0	690	486	syx:SynWH7803_2205	hypothetical protein						A5GNW6
contig_184647_292_1014_-	1374	0	0	0	0	0.84928	0	0	0	0	0.79465	0.79006	1.5636	0.96928	0.95395	1.8851	0	0	0	0	0.283093	0	1.04944	1.26944	0	0	0.490332	0	0.445284	0.533229	0	0.550182	0.920215	0	1098	723	tps:THAPSDRAFT_21227	hypothetical protein						B8BU20
contig_184685_1_523_+	1374	0	0.97947	2.0464	0	0	0	0	0	0	1.5893	1.5801	0.78178	0	0	0	0	0	0	1.00862	0	0	1.31706	0	0	1.02351	0	0	0.463589	0	0	1.07224	1	0	2241	523
contig_184860_241_1433_-	1374	0	0	0	0	0.84928	1.6204	1.1168	2.2054	2.0474	0.79465	0	0.78178	0	0	0	0	0	0	0	0.823227	1.78987	0.525477	0	0	0	0.810514	0.588222	0.455122	0	0	-0.318298	0	0.018386	2624	1193	amr:AM1_3447	asd; aspartate-semialdehyde dehydrogese; K00133 aspartate-semialdehyde dehydrogese [EC:1.2.1.11]	amr01110||amr01100||amr00300||amr00270||amr01120||amr00260	K00133	aspartate-semialdehyde dehydrogese [EC:1.2.1.11]	Glycine, serine and threonine metabolism || Cysteine and methionine metabolism || Lysine biosynthesis || 2-Oxocarboxylic acid metabolism || Biosynthesis of amino acids	1.2.1.11	B0C143	KOG4777	Aspartate-semialdehyde dehydrogese	Amino acid transport and metabolism	METABOLISM	_GAP_||PF01118||PF02774
contig_184865_234_1037_+	1374	0.98843	0	0	1.7613	0	0	0	0	0	0.79465	0.79006	1.5636	0.96928	0.95395	0	0	0	0	0.329477	0.5871	0	1.04944	0.641077	0	0.57067	1.01689	0	0.445284	0.555242	0	0.377347	0.398758	0	1382	804													_GAP_||PF00160
contig_185075_82_789_+	1374	0	0	0	0	0.84928	0	3.3504	2.2054	3.0711	1.5893	4.7404	0.78178	2.9078	3.8158	1.8851	0	0	0	0	0.283093	2.87563	2.37049	2.86957	0	0	0.490332	0.597002	2.09174	0.965918	0	0.731317	1	0	1005	708	vcn:VOLCADRAFT_83282	poa2; 20S proteasome alpha subunit B; K02726 20S proteasome subunit alpha 2 [EC:3.4.25.1]							KOG0181	20S proteasome, regulatory subunit alpha type PSMA2/PRE8	Posttranslatiol modification, protein turnover, chaperones	CELLULAR PROCESSES AND SIGLING	PF10584||PF00227
contig_185096_214_999_+	1374	2.9653	2.9384	1.0232	0	1.6986	1.6204	0	0	1.0237	0	0.79006	0.78178	0	0	0	0	0	0	2.30897	1.10633	0.341233	0.523947	0	0	1.11359	0.95891	0.591033	0.45377	0	0	0.275251	0.00291905	0	1605	786	ani:AN4546.2	hypothetical protein							KOG2191	R-binding protein NOVA1/PASILLA and related KH domain proteins	R processing and modification	INFORMATION STORAGE AND PROCESSING	PF00013||_GAP_
contig_185196_996_1583_-	1374	0	0.97947	0	0.88064	0.84928	0	2.2336	2.2054	2.0474	0.79465	0	0.78178	2.9078	2.8619	0.94256	0	0	0	0.32649	0.57664	2.16213	0.525477	2.23742	0	0.565497	0.499631	0.100357	0.455122	1.12162	0	-1.05849	0	1	1640	588	tps:THAPSDRAFT_1415	hypothetical protein						B8BQW0					_GAP_||PF01145
contig_185322_230_1641_-	1374	1.9769	0.97947	2.0464	0	0	0	0	0	0	0	0	0	0	0	0	0	0	0	1.66759	0	0	0	0	0	0.596942	0	0	0	0	0	0.146663	0	0	2300	1412									KOG2388	UDP-N-acetylglucosamine pyrophosphorylase	Cell wall/membrane/envelope biogenesis	CELLULAR PROCESSES AND SIGLING	_GAP_||PF01704||_GAP_
contig_185362_176_763_-	1374	0.98843	1.9589	2.0464	0.88064	0	0.81019	0	0	0	1.5893	2.3702	0.78178	3.8771	1.9079	1.8851	0	0	0	1.66458	0.56361	0	1.58043	2.5567	0	0.587192	0.48937	0	0.794247	1.14356	0	0.718685	1	0	1796	588	pti:PHATRDRAFT_14682	hypothetical protein						B7G6A6					PF00160
contig_185652_255_1326_-	1374	0.98843	0.97947	0	0.88064	0	1.6204	0	0	0	0.79465	0	0.78178	0.96928	1.9079	0	0	0	0	0.655967	0.83368	0	0.525477	0.95906	0	0.568101	0.81122	0	0.455122	0.953991	0	0.382314	0.398952	0	1327	1072									KOG3870	Uncharacterized conserved protein	Function unknown	POORLY CHARACTERIZED	PF01937
contig_185841_239_1172_-	1374	0.98843	1.9589	1.0232	0.88064	0.84928	0.81019	0	0	0	0.79465	0.79006	0.78178	0	0	0.94256	0	0	0	1.32351	0.846703	0	0.78883	0.314187	0	0.550538	0.0352956	0	0.00652257	0.544187	0	0.416281	0.558915	0	1173	934									KOG3075	Ribose 5-phosphate isomerase	Carbohydrate transport and metabolism	METABOLISM	_GAP_||PF06026
contig_186106_1_951_-	1374	0.98843	0.97947	1.0232	0	0	0	1.1168	1.1027	1.0237	0	0	0	0.96928	0.95395	1.8851	1.744	0	0	0.997033	0	1.08107	0	1.26944	0.581333	0.0230996	0	0.0501787	0	0.533229	1.0069	-1.24864	0	1	1237	951
contig_186187_1692_2159_+	1374	1.9769	1.9589	3.0696	2.6419	1.6986	3.2408	0	2.2054	1.0237	1.5893	0.79006	1.5636	1.9386	0	0.94256	0	0	0	2.33513	2.5271	1.07637	1.31432	0.960387	0	0.63613	0.777483	1.10364	0.454204	0.969423	0	0.597475	0.999996	0	2848	468									KOG3478	Prefoldin subunit 6, KE2 family	Posttranslatiol modification, protein turnover, chaperones	CELLULAR PROCESSES AND SIGLING	_GAP_||PF01920||_GAP_
contig_186243_2079_4215_+	1374	0.98843	0.97947	1.0232	2.6419	2.5478	1.6204	0	1.1027	1.0237	0	0	0	0	0	0	0	0	0	0.997033	2.27003	0.7088	0	0	0	0.0230996	0.564563	0.615108	0	0	0	-1.06336	0	1	4219	2137
contig_186543_1114_1908_-	1374	1.9769	0	0	0.88064	0	0	0	0	0	0	0	0	0	0	0	0	0	0	0.658967	0.293547	0	0	0	0	1.14136	0.508438	0	0	0	0	0.595853	1	0	2543	795	isc:IscW_ISCW018757	phosphoinositol 4-phosphate adaptor protein, putative (EC:2.7.11.9); K08051 pleckstrin homology domain containing, family A (phosphoinositide binding specific) member 8		K08051	pleckstrin homology domain containing, family A (phosphoinositide binding specific) member 8			B7PLB7					PF00169||_GAP_
contig_186631_73_708_-	1374	0	0	0	0	0	0	0	0	0	0.79465	1.5801	0.78178	0	0	0	0	0	0	0	0	0	1.05218	0	0	0	0	0	0.45724	0	0	1.30212	1	0	2844	636	tps:THAPSDRAFT_8122	hypothetical protein						B8C8G9
contig_188063_299_766_-	1374	1.9769	1.9589	1.0232	0.88064	0.84928	0	0	0	0	0	0	0	0	0	0	1.744	0	1.7178	1.653	0.57664	0	0	0	1.15393	0.545497	0.499631	0	0	0	0.999421	-0.327786	0.00075822	0.380667	766	468
contig_188456_2058_3199_+	1374	0	0	0	0	0	0	1.1168	0	2.0474	0	0	0	0	0	0	0	0	0	0	0	1.05473	0	0	0	0	0	1.02511	0	0	0	0.0759659	0	0	3202	1142	olu:OSTLU_45865	hypothetical protein; K03235 elongation factor 3		K03235	elongation factor 3			A4RZ93					_GAP_||PF00005||_GAP_
contig_188473_1_630_+	1374	2.9653	2.9384	3.0696	2.6419	2.5478	0.81019	2.2336	2.2054	2.0474	0.79465	1.5801	0	1.9386	2.8619	2.8277	0	1.7735	1.7178	2.9911	1.99996	2.16213	0.791583	2.54273	1.16377	0.0693007	1.03145	0.100357	0.790054	0.523474	1.00824	0.526742	0.989587	0	630	630
contig_188877_1_1731_-	1374	0.98843	1.9589	1.0232	0.88064	0	0	1.1168	1.1027	2.0474	0.79465	0	0.78178	2.9078	0.95395	2.8277	0	1.7735	0	1.32351	0.293547	1.4223	0.525477	2.22982	0.591167	0.550538	0.508438	0.541398	0.455122	1.10566	1.02393	-0.970981	0	1	1872	1731	tdn:Suden_1952	hypothetical protein						Q30P55
contig_188932_43_762_+	1374	3.9537	1.9589	3.0696	0.88064	0.84928	0.81019	0	0	0	1.5893	1.5801	0	0	0	0	1.744	0	0	2.99407	0.846703	0	1.05647	0	0.581333	0.999543	0.0352956	0	0.914939	0	1.0069
contig_189508_1_910_+	1374	0	0	0	0	0	0	0	0	0	0.79465	1.5801	1.5636	0	0	0	0	0	0	0	0	0	1.31278	0	0	0	0	0	0.448792	0	0	0.190943	0.145142	0.00168767	1014	910													PF00701
contig_189679_59_712_-	1374	1.9769	1.9589	3.0696	1.7613	2.5478	1.6204	1.1168	2.2054	2.0474	2.384	2.3702	1.5636	1.9386	1.9079	1.8851	1.744	1.7735	1.7178	2.33513	1.9765	1.78987	2.10593	1.91053	1.7451	0.63613	0.499751	0.588222	0.469725	0.026847	0.0278663	0.152585	0.0900485	0.00180905	1209	654
contig_189782_1_898_+	1374	0.98843	1.9589	1.0232	0.88064	0.84928	0	1.1168	1.1027	1.0237	1.5893	0.79006	1.5636	0	0	0	0	0	0	1.32351	0.57664	1.08107	1.31432	0	0	0.550538	0.499631	0.0501787	0.454204	0	0	-0.046869	2.42e-06	0.000213705	898	898
contig_190566_212_882_-	1374	0.98843	0	1.0232	0.88064	0.84928	0.81019	2.2336	1.1027	1.0237	0	0	0.78178	0	0.95395	0	0	0	0	0.670543	0.846703	1.45333	0.260593	0.317983	0	0.580968	0.0352956	0.676884	0.451361	0.550763	0	0.649901	0.999997	0	882	671	vcn:VOLCADRAFT_108271	hypothetical protein											_GAP_||PF13905
contig_190633_1_697_+	1374	0.98843	0.97947	0	0	0	0.81019	0	0	0	1.5893	1.5801	0.78178	0.96928	0.95395	0.94256	0	0	0	0.655967	0.270063	0	1.31706	0.955263	0	0.568101	0.467763	0	0.463589	0.0134083	0	-0.836754	0	0.997421	1098	697	fps:FP0015	sprD; putative cell surface protein precursor SprD						A6GVL2
contig_190687_299_898_-	1374	2.9653	3.9179	2.0464	0.88064	1.6986	0.81019	0	0	0	0	0	0.78178	0	0	0	0	0	0	2.97653	1.12981	0	0.260593	0	0	0.935801	0.493844	0	0.451361	0	0	-0.633274	0	0.999414	1153	600
contig_190735_250_990_-	1374	0	0.97947	1.0232	1.7613	2.5478	0	2.2336	2.2054	1.0237	0.79465	0.79006	0.78178	0	0	0	0	0	0	0.667557	1.43637	1.8209	0.78883	0	0	0.578534	1.30461	0.690539	0.00652257	0	0	0.120841	0	0	1423	741									KOG0032	Ca2+/calmodulin-dependent protein kise, EF-Hand protein superfamily	Sigl transduction mechanisms	CELLULAR PROCESSES AND SIGLING	PF00069||_GAP_
contig_190922_1_1033_+	1374	0	0.97947	1.0232	0	0.84928	0	1.1168	1.1027	0	1.5893	1.5801	1.5636	1.9386	1.9079	1.8851	1.744	0	0	0.667557	0.283093	0.739833	1.57767	1.91053	0.581333	0.578534	0.490332	0.640753	0.0130216	0.026847	1.0069	-0.269665	6.93e-07	0.17565	1459	1033
contig_191368_1_464_-	1374	0	0	0	0.88064	0.84928	0.81019	1.1168	1.1027	2.0474	0	0	0	0	0	0	0	0	0	0	0.846703	1.4223	0	0	0	0	0.0352956	0.541398	0	0	0	-0.253356	0	0	464	464	olu:OSTLU_50659	hypothetical protein; K00856 adenosine kise [EC:2.7.1.20]	olu00230||olu01100	K00856	adenosine kise [EC:2.7.1.20]	Purine metabolism	2.7.1.20	A4S471	KOG2854	Possible pfkB family carbohydrate kise	Carbohydrate transport and metabolism	METABOLISM	PF00294
contig_193578_1_580_-	1374	0.98843	0.97947	1.0232	1.7613	0.84928	0.81019	0	0	0	0.79465	0.79006	0.78178	0	0	0	0	0	0	0.997033	1.14026	0	0.78883	0	0	0.0230996	0.538194	0	0.00652257	0	0	-0.249449	0.000547485	0.220724	580	580
contig_19462_268_791_-	1374	1.9769	2.9384	3.0696	1.7613	1.6986	1.6204	0	2.2054	1.0237	0.79465	0.79006	0.78178	2.9078	1.9079	1.8851	0	0	0	2.66163	1.69343	1.07637	0.78883	2.2336	0	0.596614	0.0705919	1.10364	0.00652257	0.583986	0	0.628946	0.982768	0	791	524	cyn:Cyan7425_3860	FKBP-type peptidylprolyl isomerase; K01802 peptidylprolyl isomerase [EC:5.2.1.8]		K01802	peptidylprolyl isomerase [EC:5.2.1.8]		5.2.1.8	B8HUH5	KOG0544	FKBP-type peptidyl-prolyl cis-trans isomerase	Posttranslatiol modification, protein turnover, chaperones	CELLULAR PROCESSES AND SIGLING	_GAP_||PF00254
contig_195903_68_415_-	1374	0.98843	0.97947	2.0464	0	0	0	1.1168	0	1.0237	0.79465	1.5801	0	0.96928	0.95395	0.94256	0	0	0	1.3381	0	0.7135	0.791583	0.955263	0	0.613422	0	0.61966	0.790054	0.0134083	0	1.33233	1	0	415	348									KOG3448	Predicted snRNP core protein	R processing and modification	INFORMATION STORAGE AND PROCESSING	PF01423
contig_197695_1_525_-	1374	0.98843	1.9589	1.0232	1.7613	1.6986	0.81019	0	0	0	1.5893	1.5801	0.78178	0	0	0	0	0	0	1.32351	1.42336	0	1.31706	0	0	0.550538	0.531948	0	0.463589	0	0
contig_198718_61_1098_+	1374	0	0	0	0	0	0	1.1168	0	0	0.79465	0.79006	0.78178	2.9078	1.9079	3.7702	0	0	0	0	0	0.372267	0.78883	2.86197	0	0	0	0.644785	0.00652257	0.931996	0	0.532645	0.968473	0	1542	1038													_GAP_||PF00249||_GAP_
contig_198730_213_941_-	1374	0	0	0	0	0	0	0	0	0	0	0	0	1.9386	1.9079	1.8851	0	0	0	0	0	0	0	1.91053	0	0	0	0	0	0.026847	0	0.53158	0.996163	0	1555	729									KOG2952	Cell cycle control protein	Cell cycle control, cell division, chromosome partitioning	CELLULAR PROCESSES AND SIGLING	PF03381
contig_198752_1989_2480_-	1374	2.9653	1.9589	2.0464	0.88064	1.6986	2.4306	2.2336	2.2054	3.0711	0.79465	1.5801	1.5636	2.9078	2.8619	2.8277	3.4881	1.7735	3.4355	2.32353	1.66995	2.50337	1.31278	2.8658	2.89903	0.557506	0.775377	0.491874	0.448792	0.0401922	0.975095	0.0422439	0.000261268	1.96e-05	2482	492
contig_198889_297_983_-	1374	0	0	0	0	0	0	0	0	0	1.5893	1.5801	2.3453	0.96928	1.9079	3.7702	0	0	0	0	0	0	1.83823	2.21579	0	0	0	0	0.439157	1.42562	0	1.08956	1	0	1195	687	pti:PHATR_46842	hypothetical protein						B5Y3Y2
contig_198968_1_1849_+	1374	0.98843	1.9589	2.0464	0.88064	0.84928	0	0	0	1.0237	1.5893	0.79006	0.78178	1.9386	1.9079	1.8851	1.744	1.7735	1.7178	1.66458	0.57664	0.341233	1.05371	1.91053	1.7451	0.587192	0.499631	0.591033	0.46385	0.026847	0.0278663	0.112675	0	0	2673	1849
[truncated: 512 more rows]
[truncated: 4 more columns]
